# Supplementary material for: Health inequities and clustering of fever, acute respiratory infection, diarrhoea and wasting in children under five in low- and middle-income countries: a Demographic and Health Surveys analysis
Source: Springer Nature journal article supplement (doi:10.1186/s12916-021-02018-0), 2021-06-24

# Health inequities and clustering of fever, acute respiratory infection, diarrhoea and wasting in children under five in low- and middle-income countries: A Demographic and Health Surveys analysis.

## Supplementary Information: Spatial distribution of adjusted prevalence (AP)

Note, APs are higher than average observed prevalence in the raw data as we present those for the reference group, which is often high risk (for example the reference group include the Poorest households, no vaccination, lowest levels of mother's education etc). We do not show uncertainty in these estimates, which is some cases is large.

### Andaman & Nicobar Islands

Fever

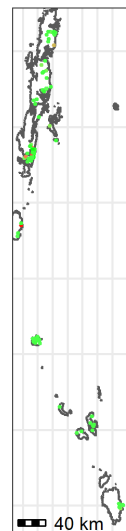

Diarrhoea

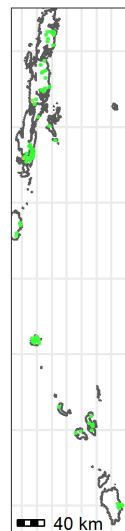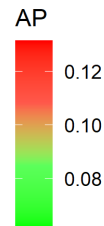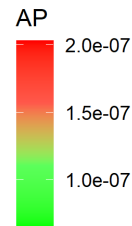

ARI

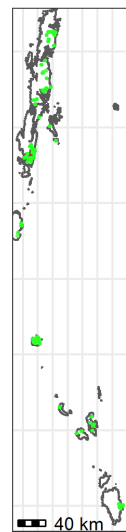

Wasting

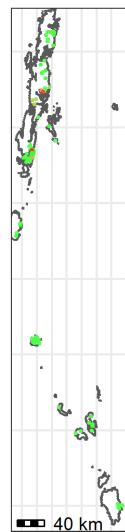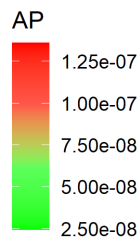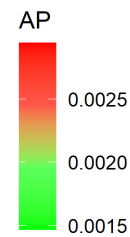

Burundi

Fever

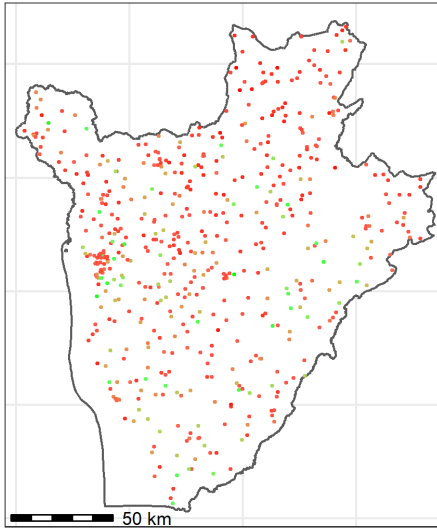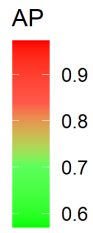

Diarrhoea

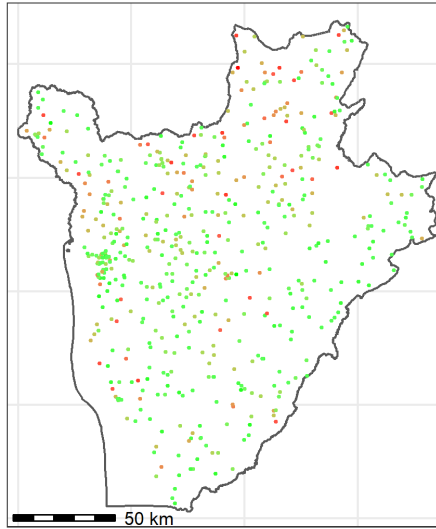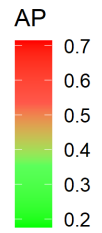

ARI

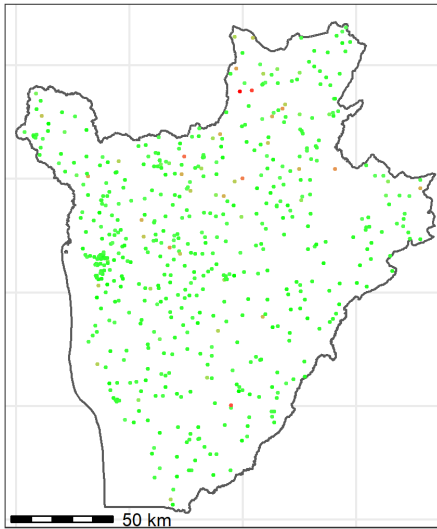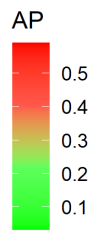

Wasting

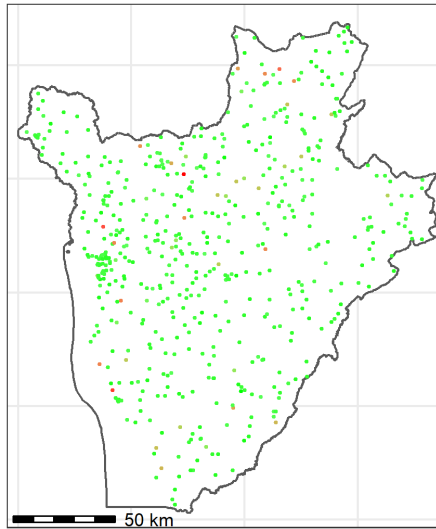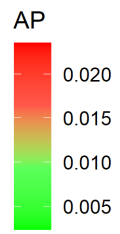

Cambodia

Fever

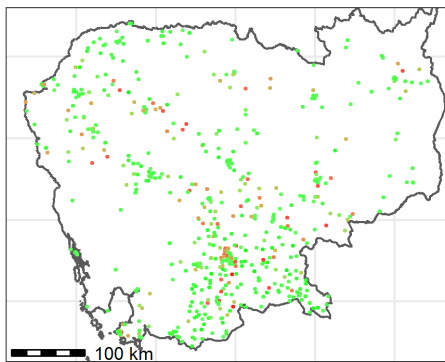

Diarrhoea

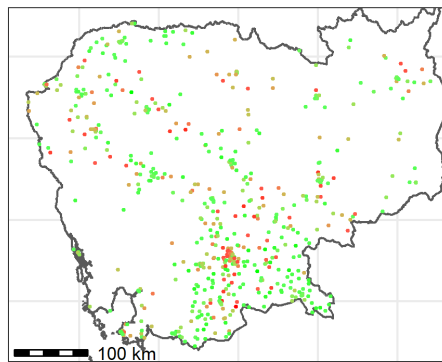

ARI

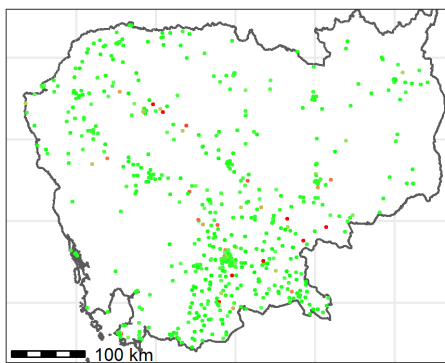

Wasting

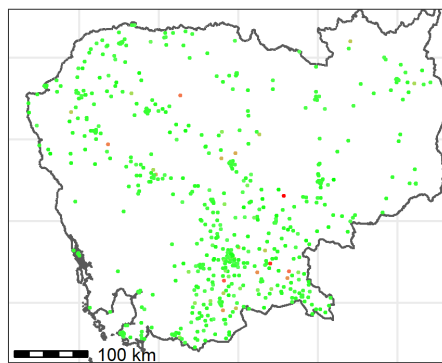

Cameroon

Fever

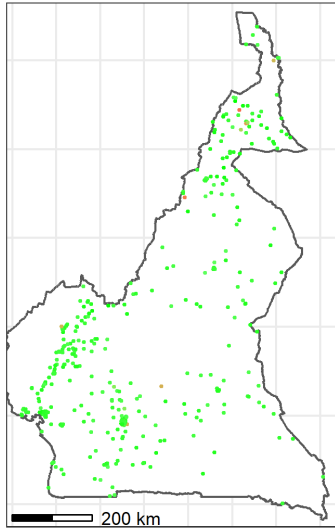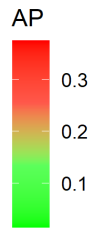

Diarrhoea

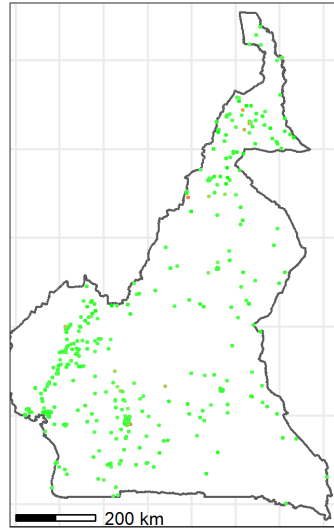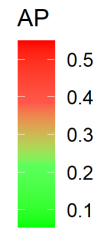

ARI

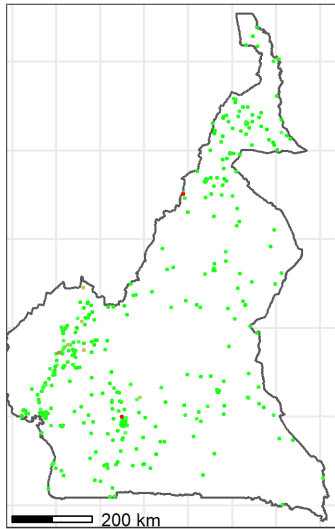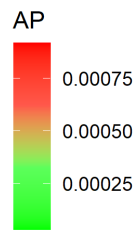

Wasting

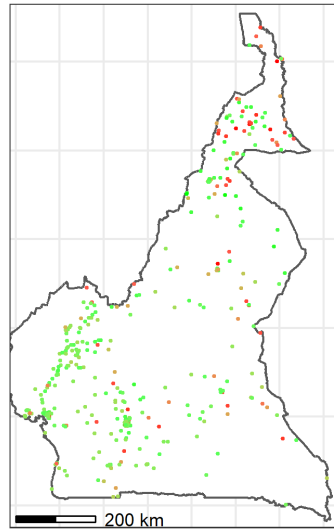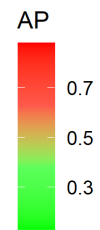

Chad

Fever

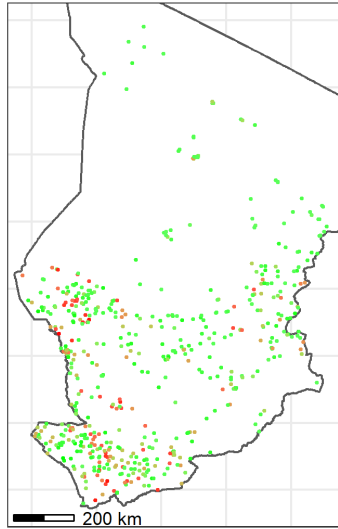

Diarrhoea

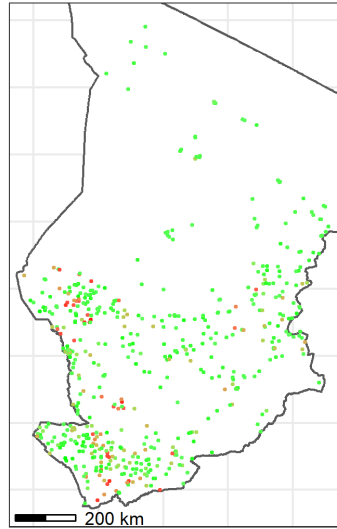

ARI

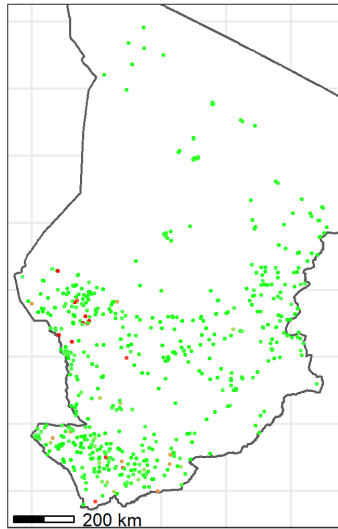

Wasting

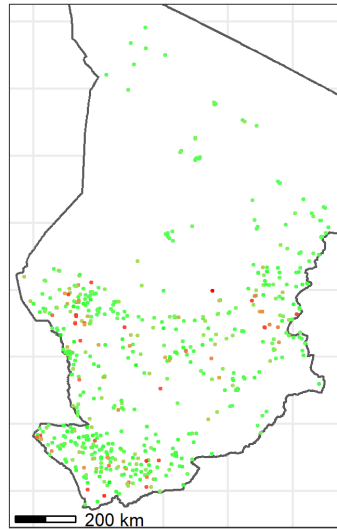

# Chandigarh

## Fever

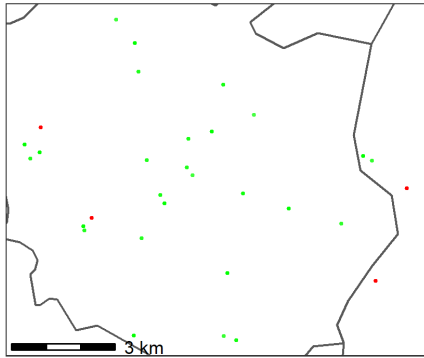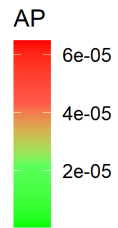

## Diarrhoea

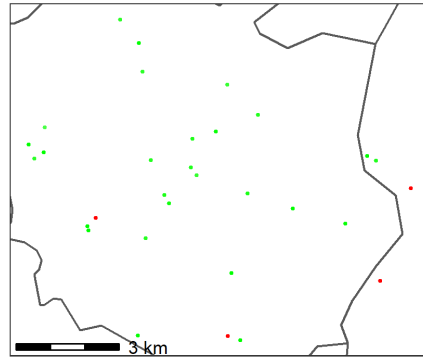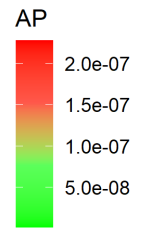

## ARI

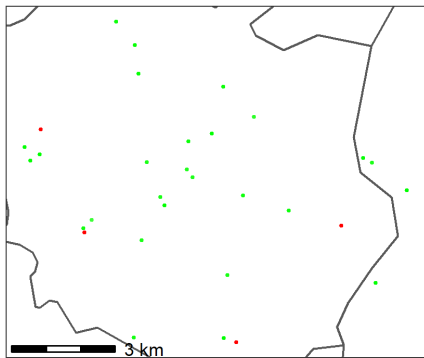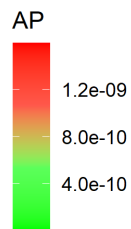

## Wasting

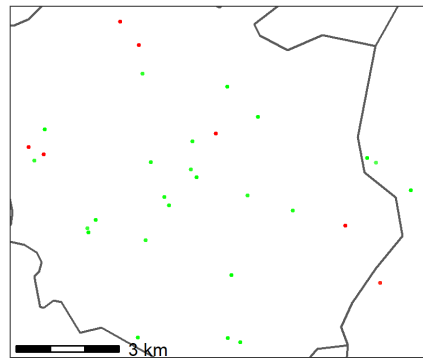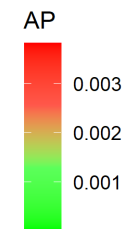

# Chhattisgarh

## Fever

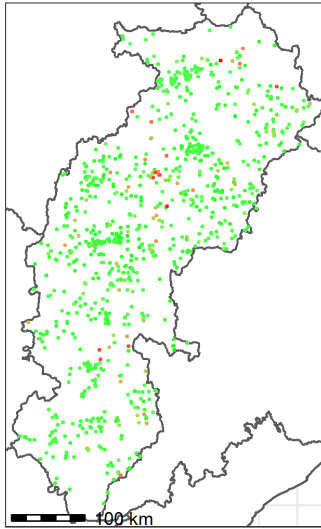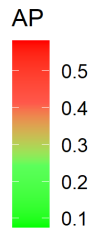

## Diarrhoea

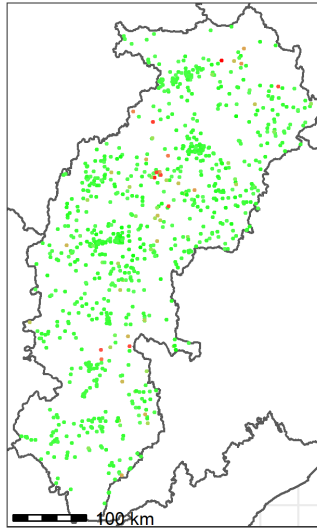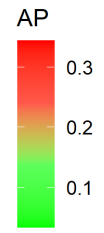

## ARI

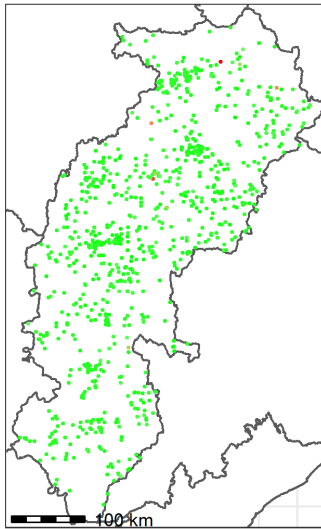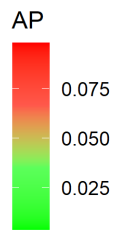

## Wasting

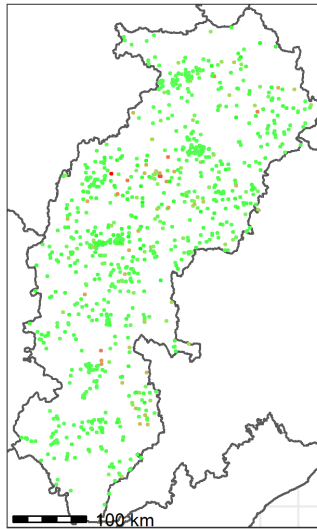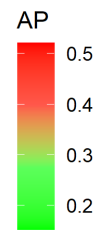

Comoros

Fever

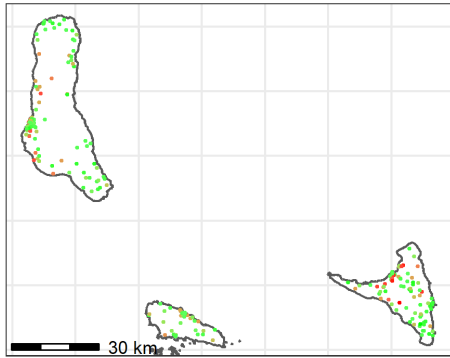

Diarrhoea

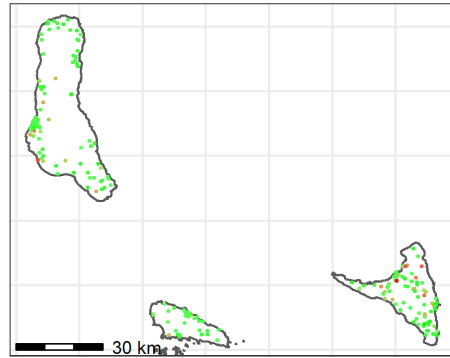

ARI

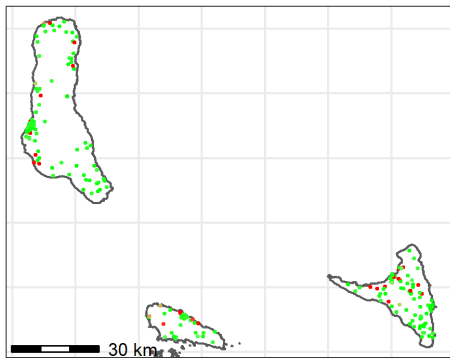

Wasting

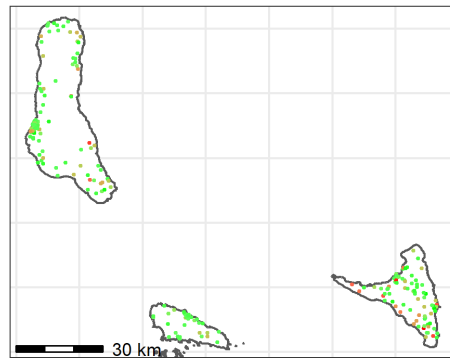



Congo Democratic Republic

Fever

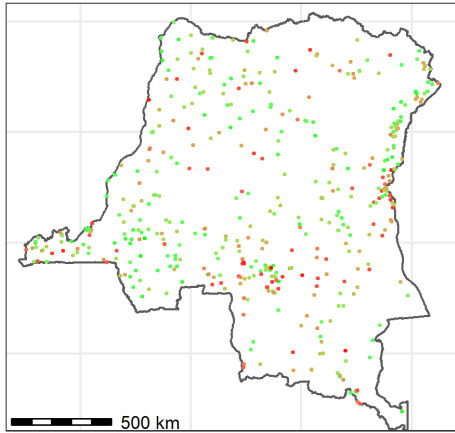

Diarrhoea

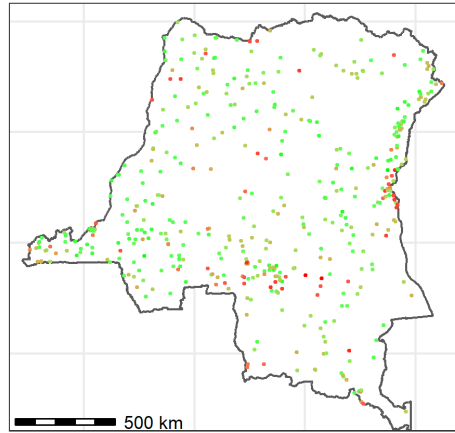

ARI

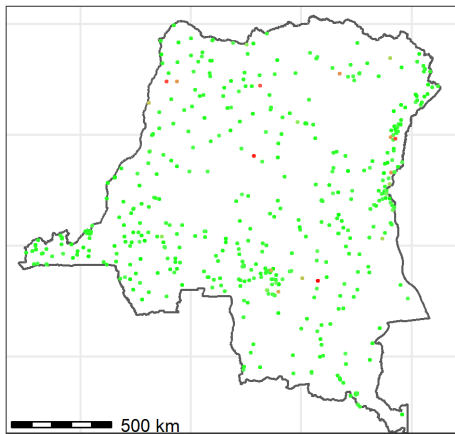

Wasting

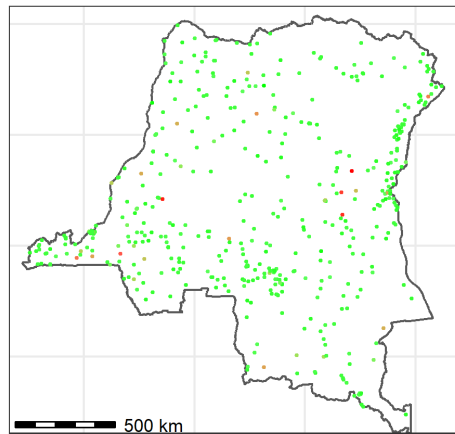

Cote d'Ivoire

Fever

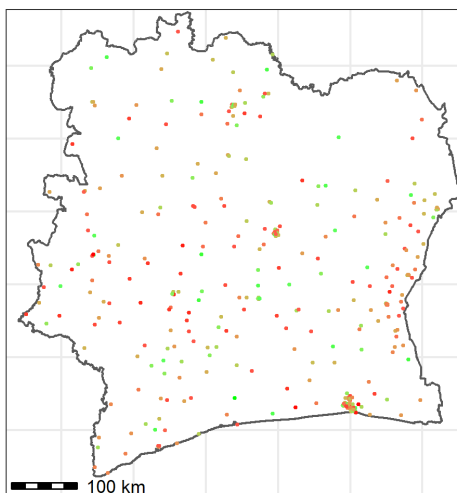

Diarrhoea

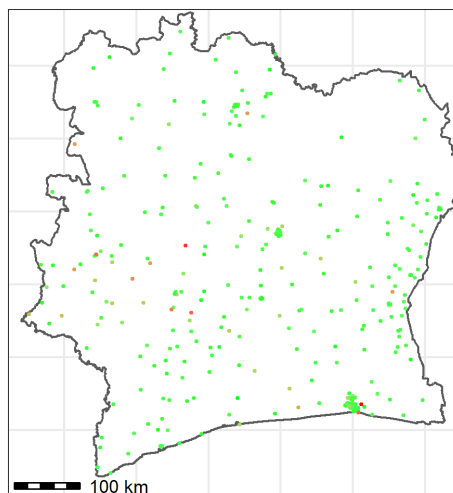

ARI

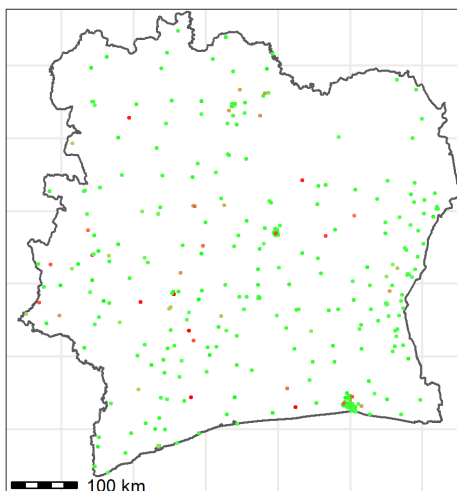

Wasting

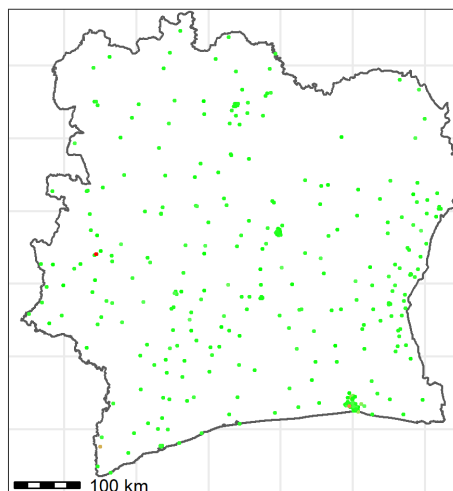

Dadra & Nagar Haveli

Fever

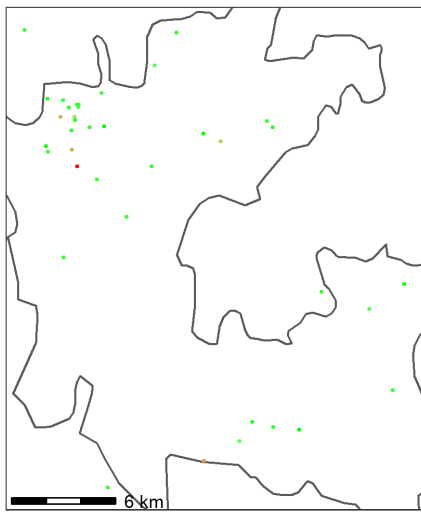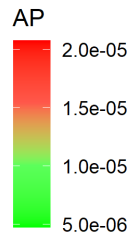

Diarrhoea

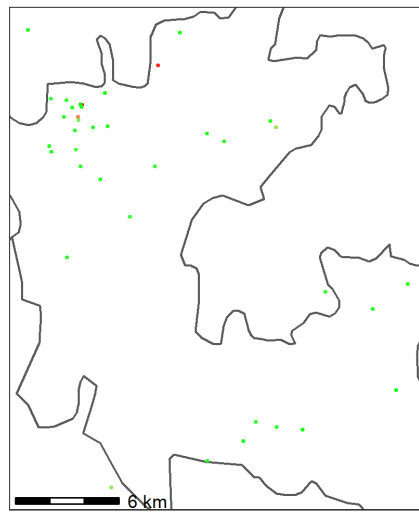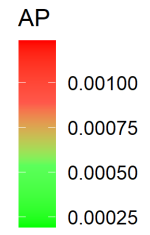

ARI

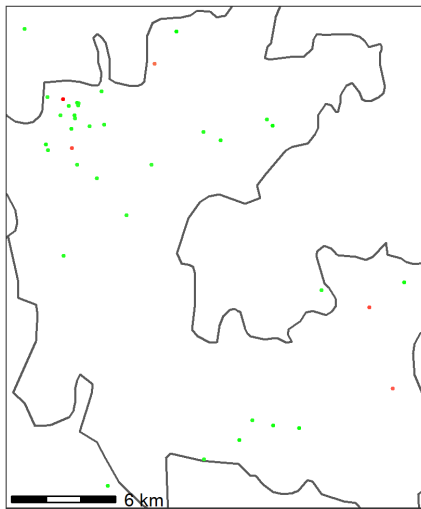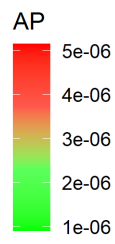

Wasting

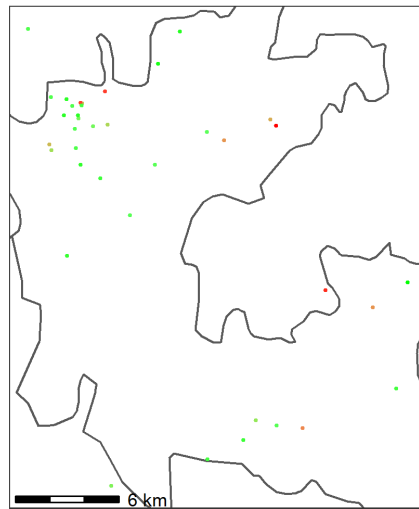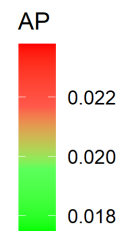

# Andhra Pradesh

## Fever

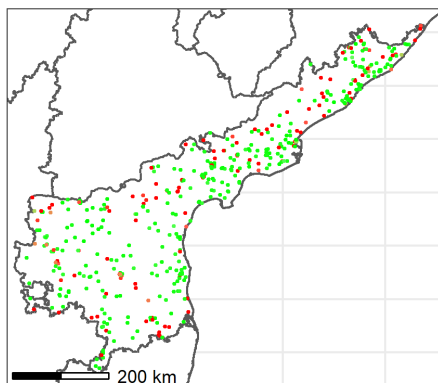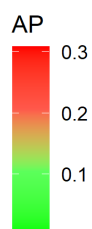

## Diarrhoea

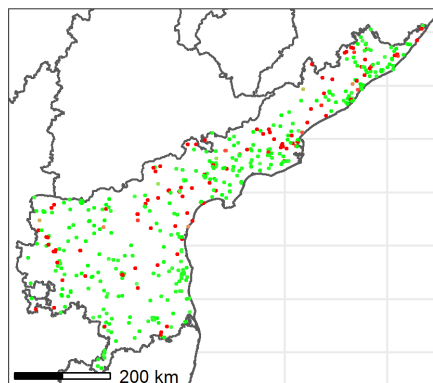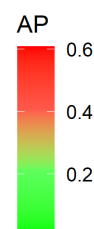

## ARI

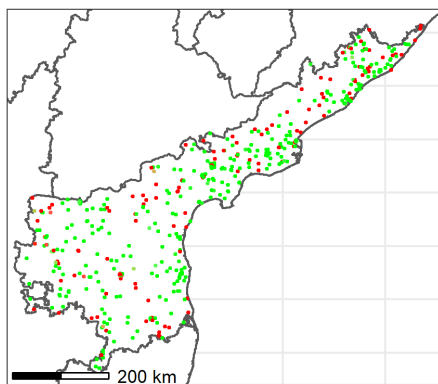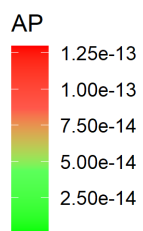

## Wasting

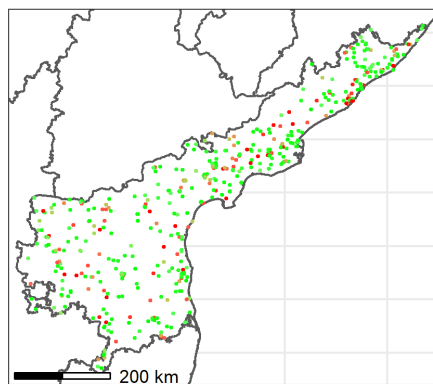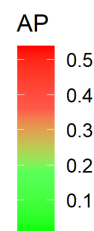

Daman & Diu

Fever

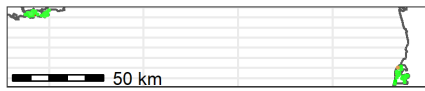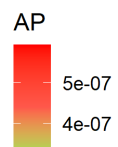

ARI

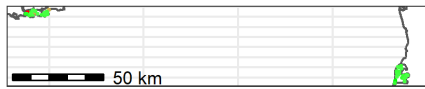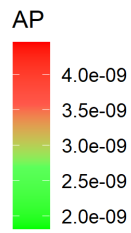

Diarrhoea

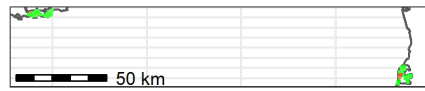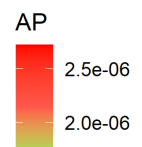

Wasting

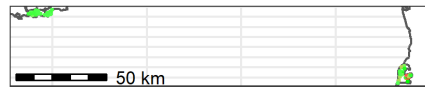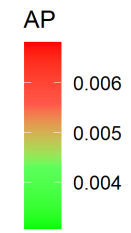

Egypt

Fever

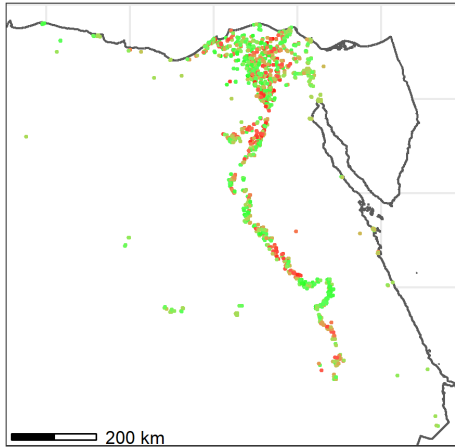

Diarrhoea

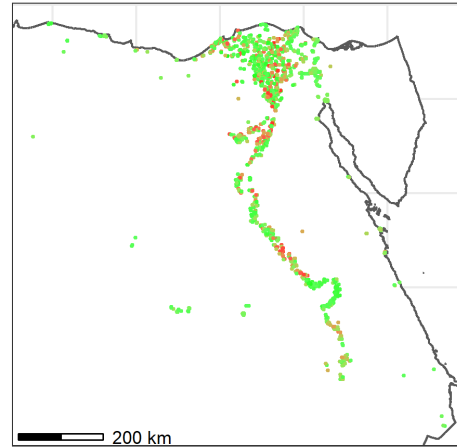

ARI

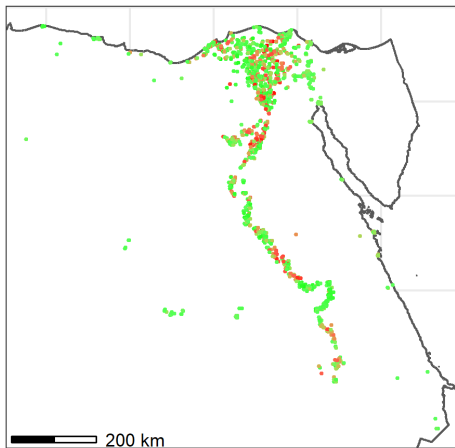

Wasting

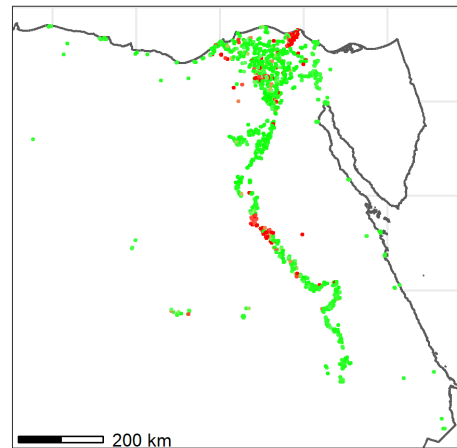

Ethiopia

Fever

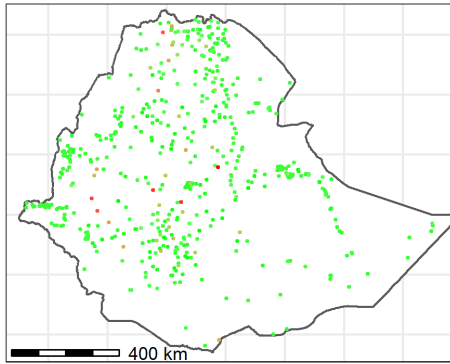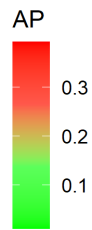

Diarrhoea

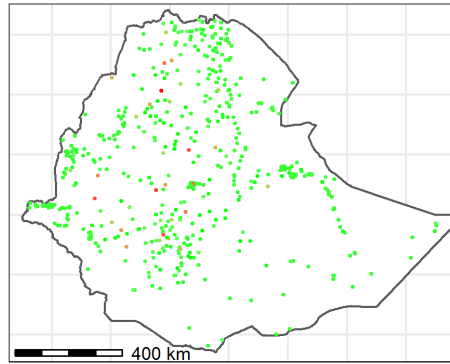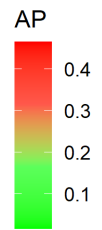

ARI

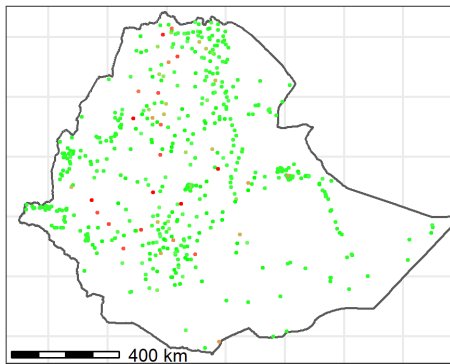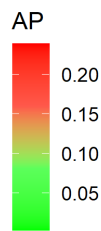

Wasting

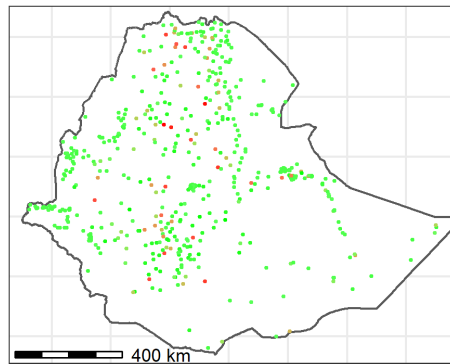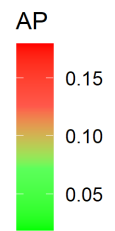

Gabon

Fever

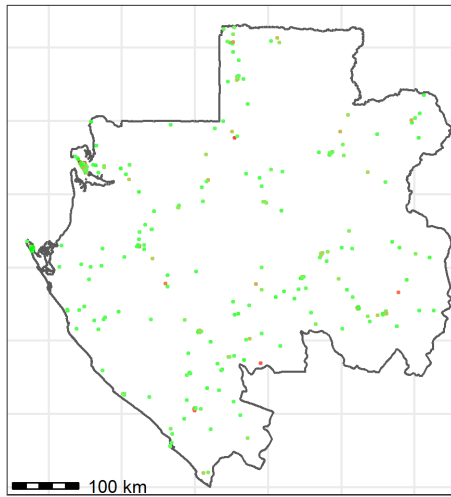

Diarrhoea

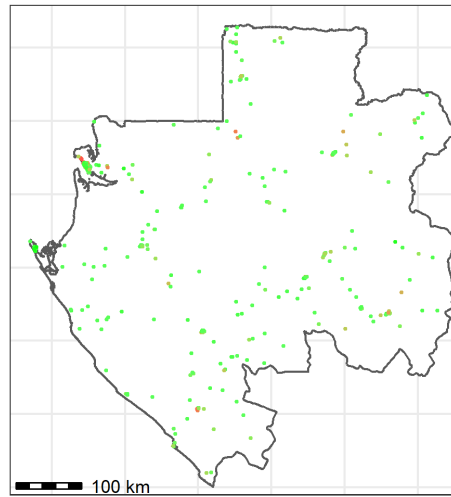

ARI

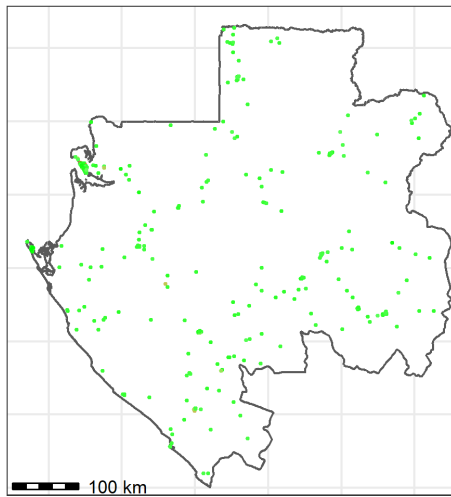

Wasting

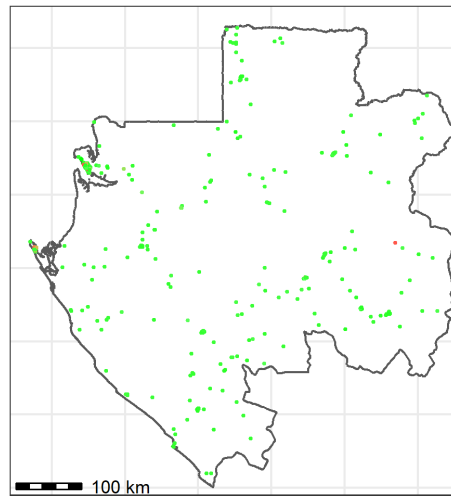



Ghana

Fever

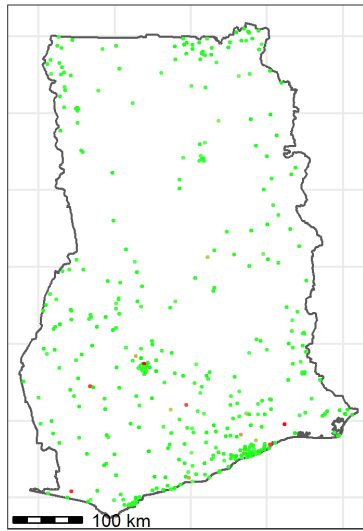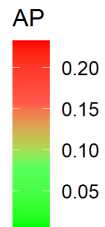

Diarrhoea

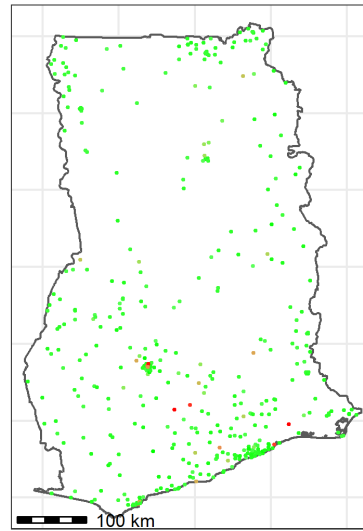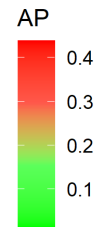

ARI

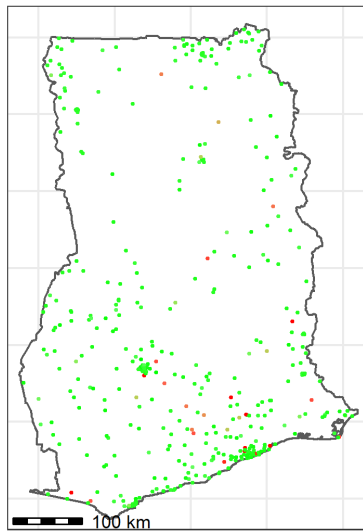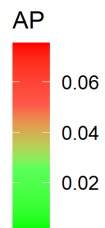

Wasting

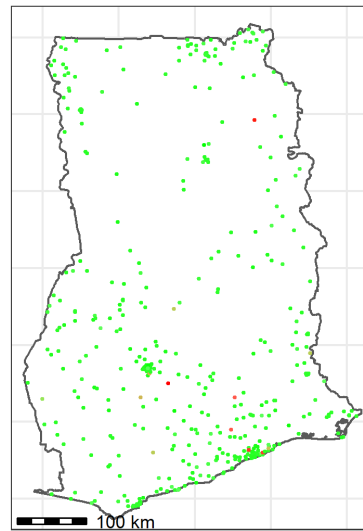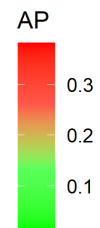

Goa

Fever

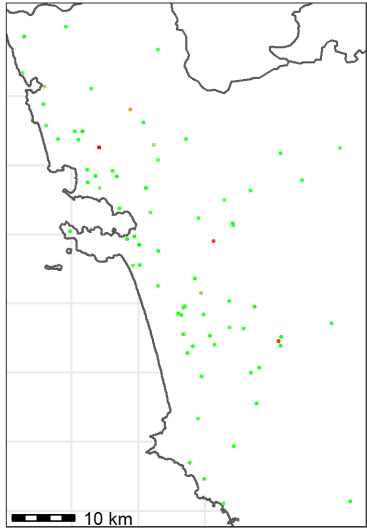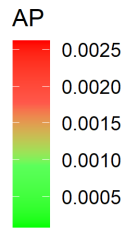

Diarrhoea

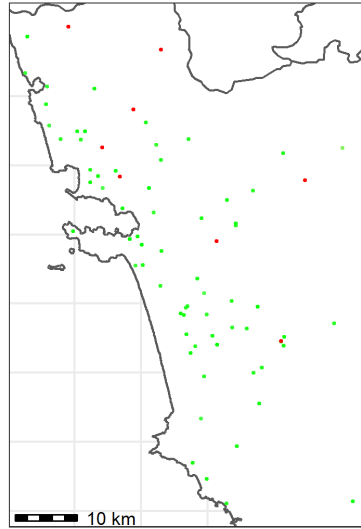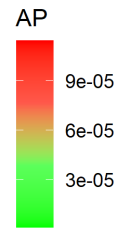

ARI

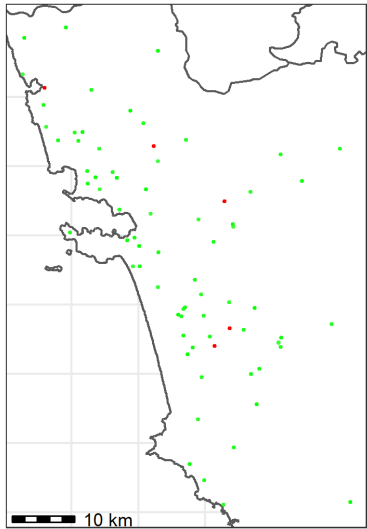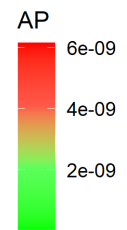

Wasting

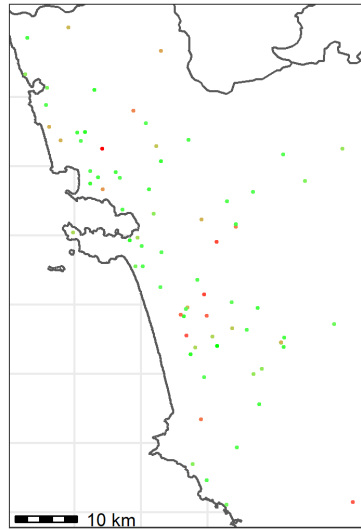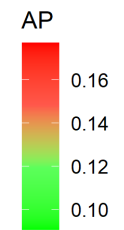

Guinea

Fever

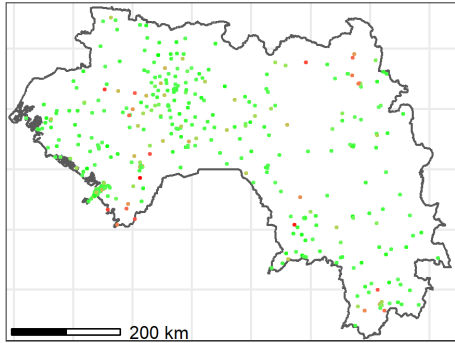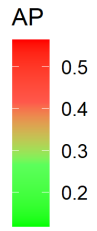

Diarrhoea

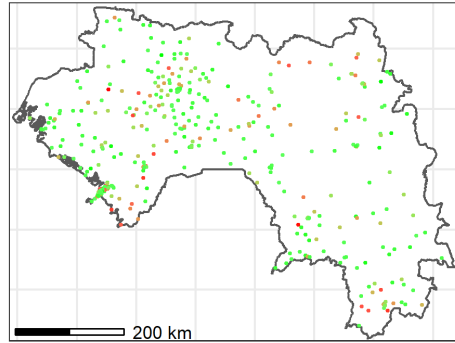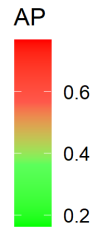

ARI

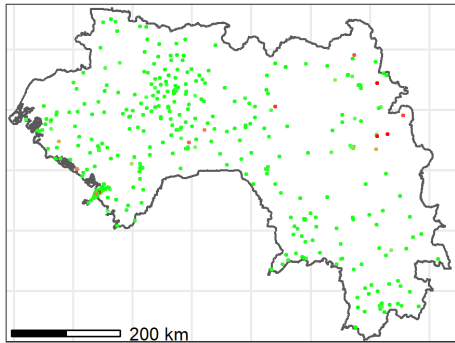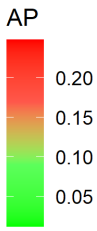

Wasting

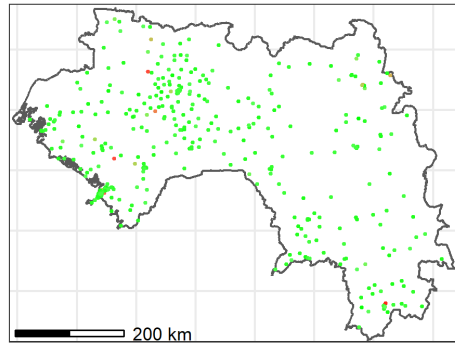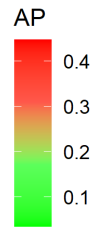

# Gujarat

## Fever

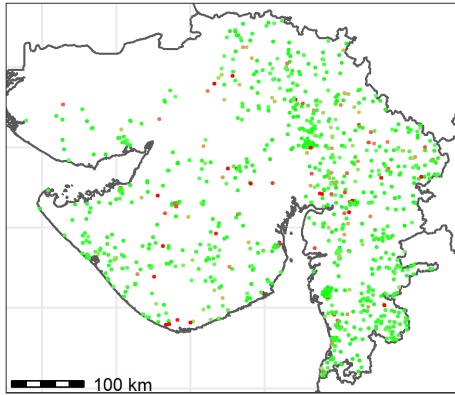

## Diarrhoea

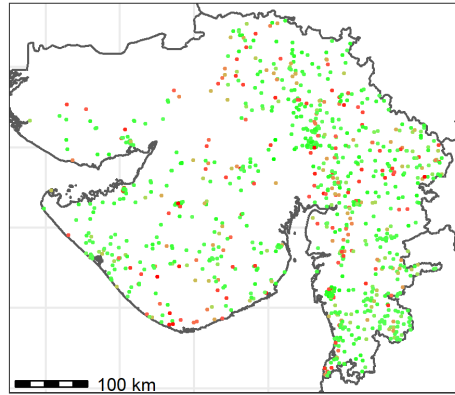

## ARI

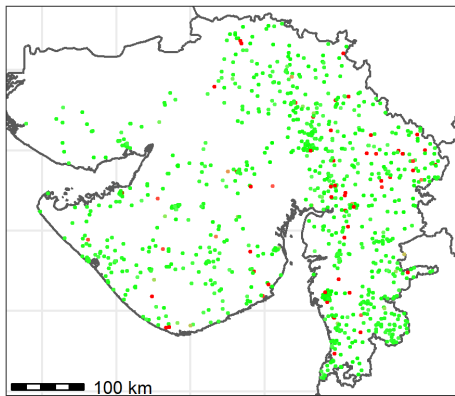

## Wasting

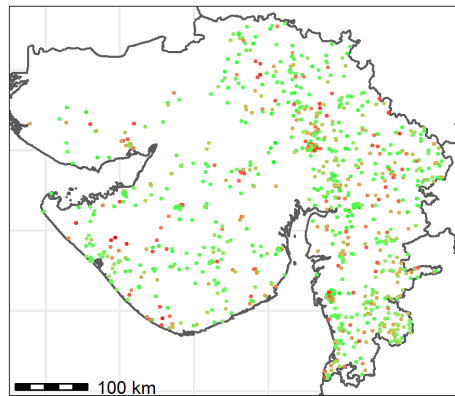

Haiti

Fever

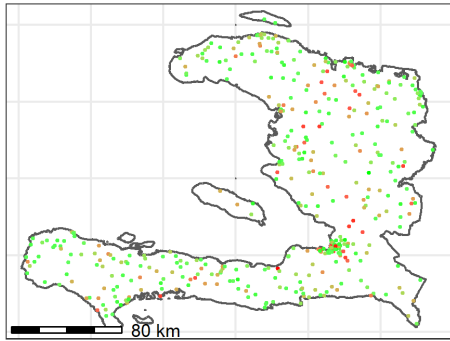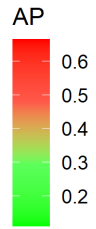

Diarrhoea

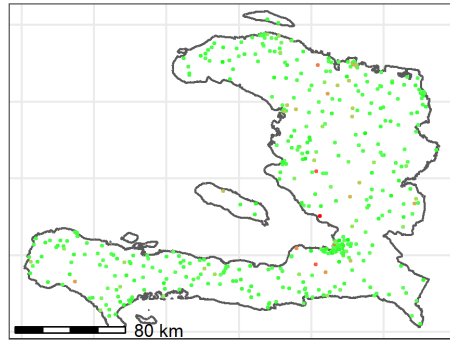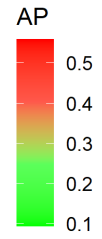

ARI

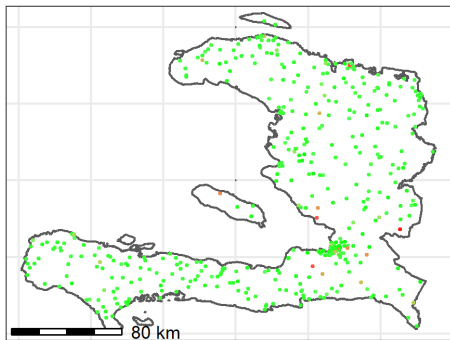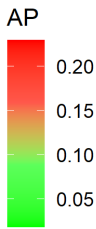

Wasting

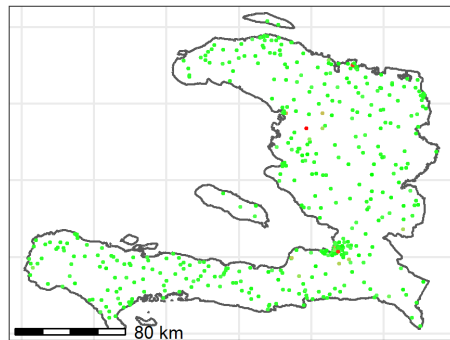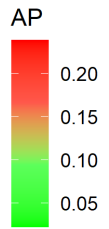

Haryana

Fever

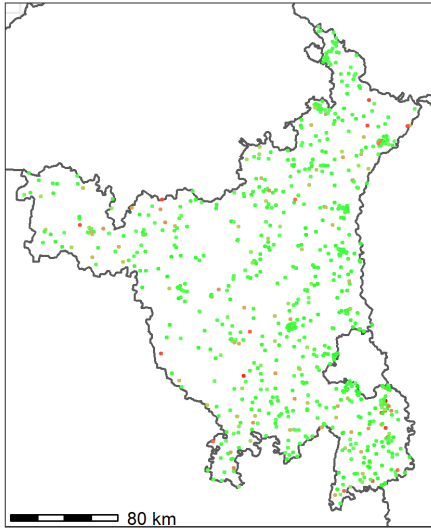

Diarrhoea

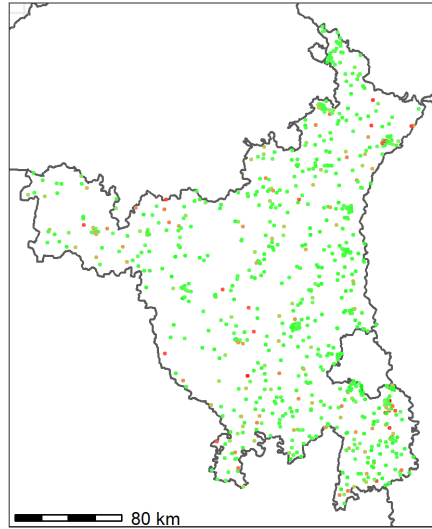

ARI

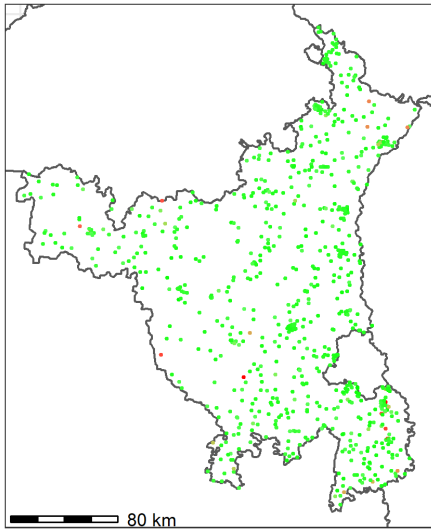

Wasting

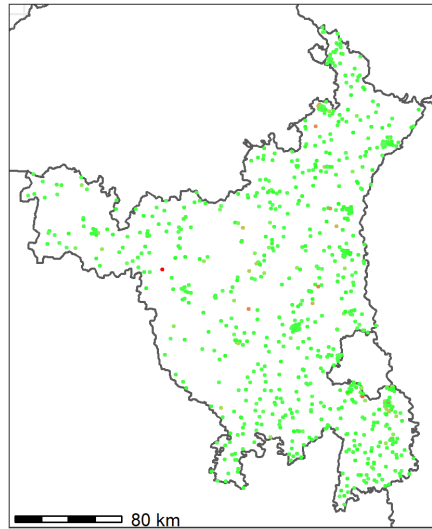

Angola

Fever

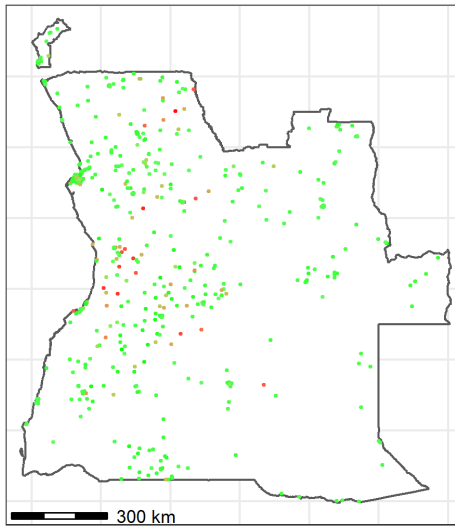

Diarrhoea

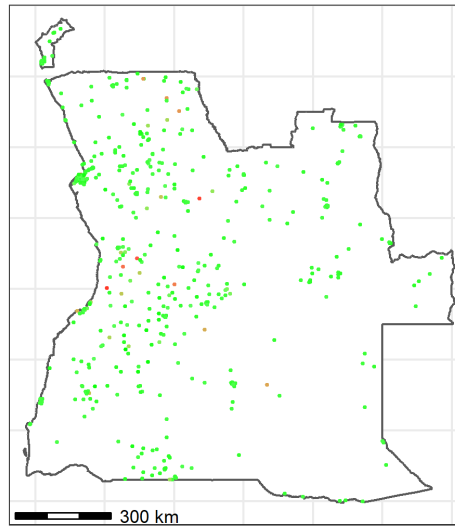

ARI

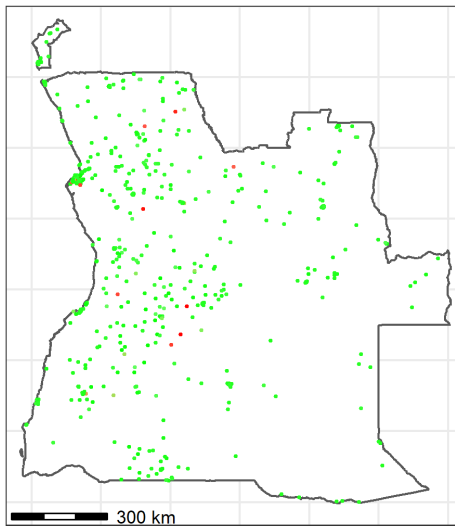

Wasting

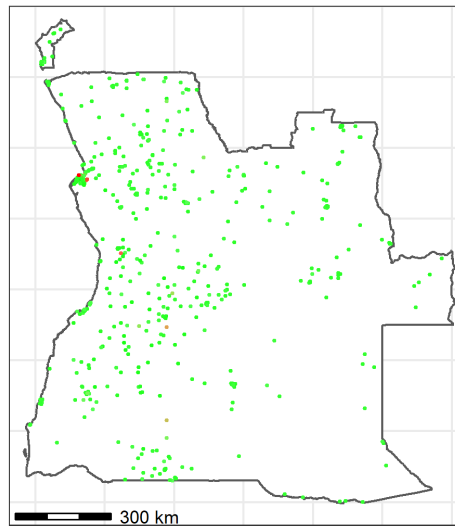

# Himachal Pradesh

## Fever

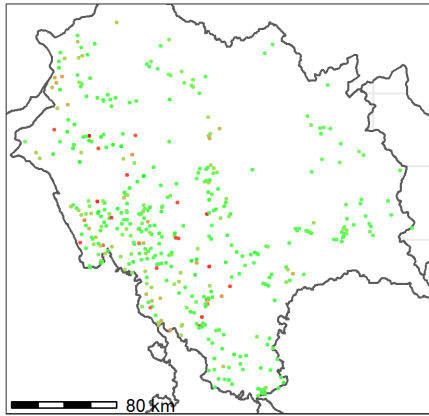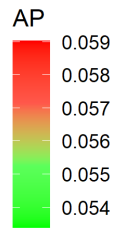

## Diarrhoea

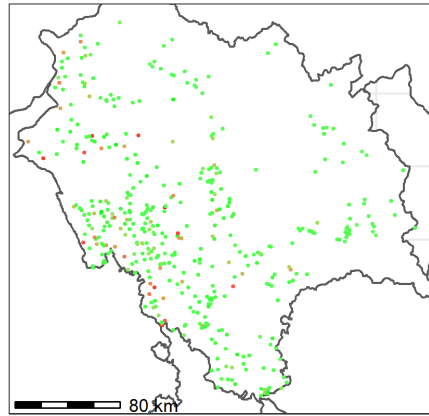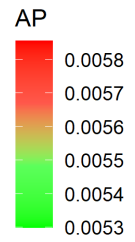

## ARI

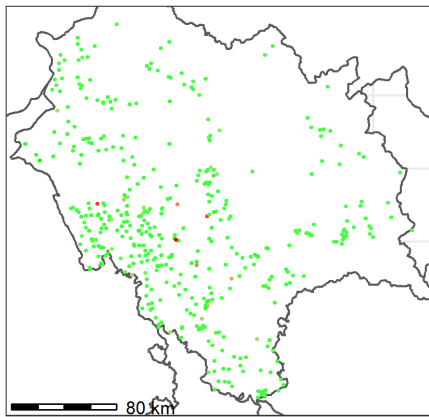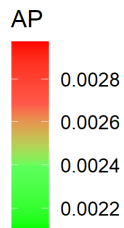

## Wasting

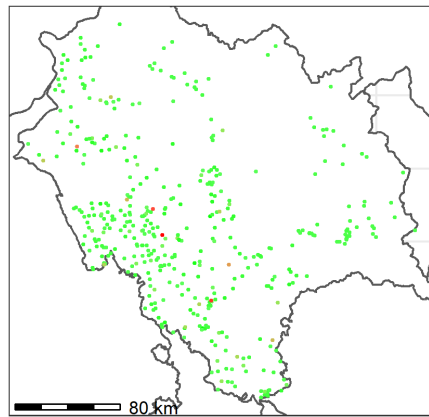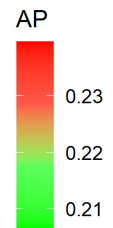



Jammu & Kashmir

Fever

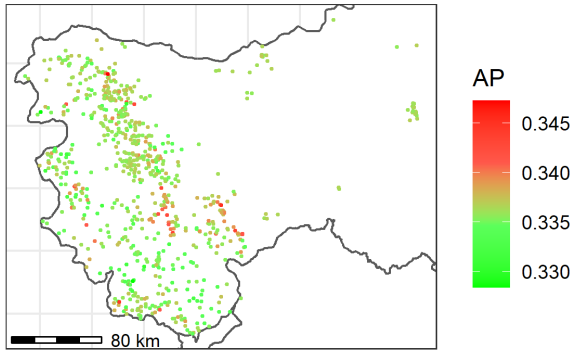

Diarrhoea

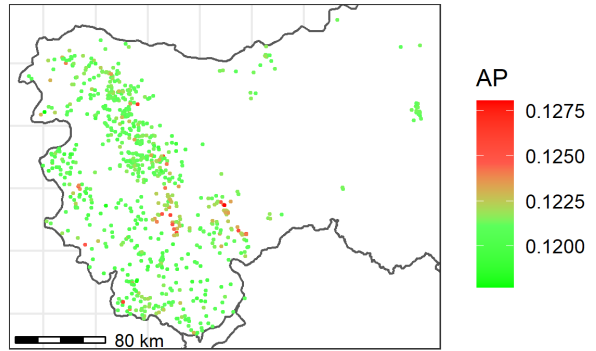

ARI

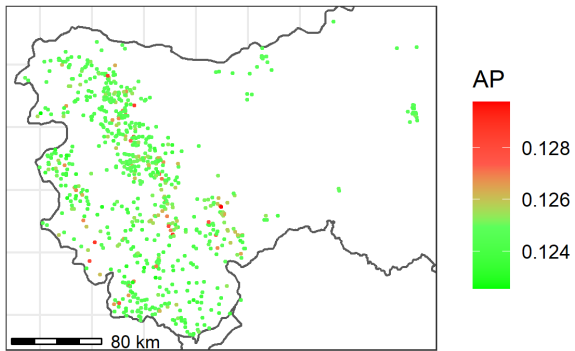

Wasting

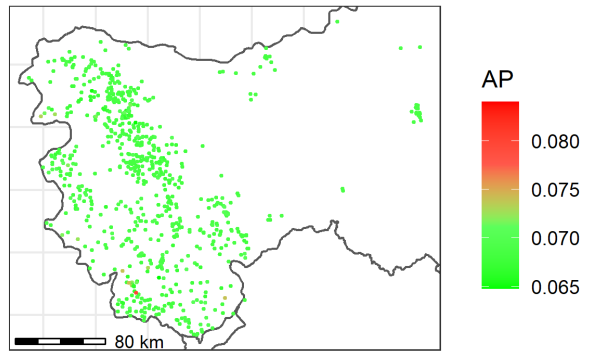

# Jharkhand

## Fever

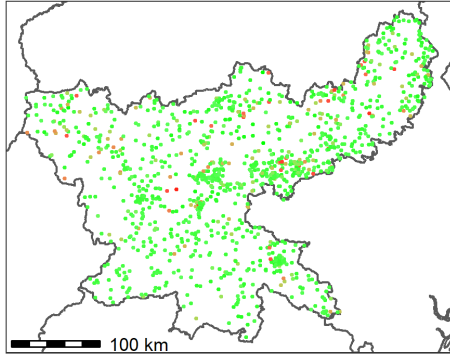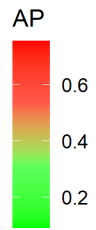

## Diarrhoea

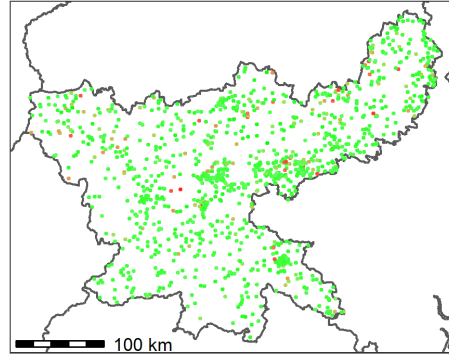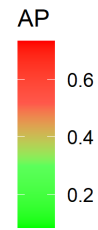

## ARI

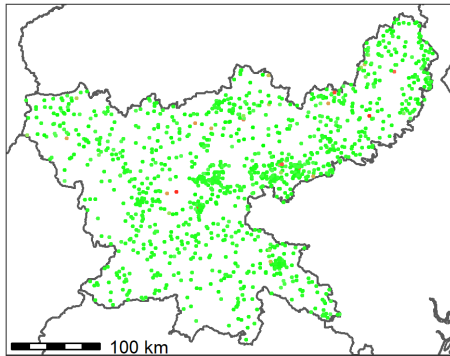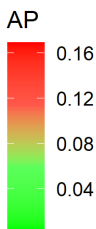

## Wasting

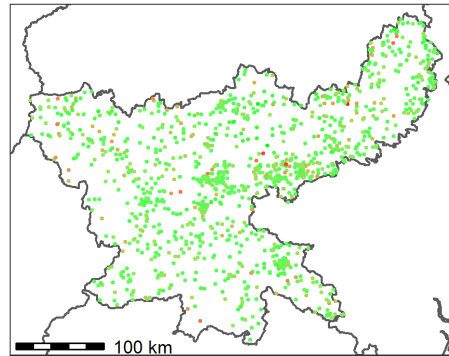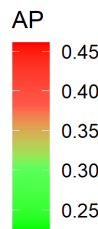

# Karnataka

## Fever

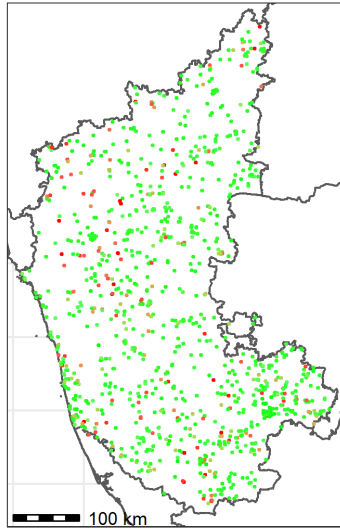

## Diarrhoea

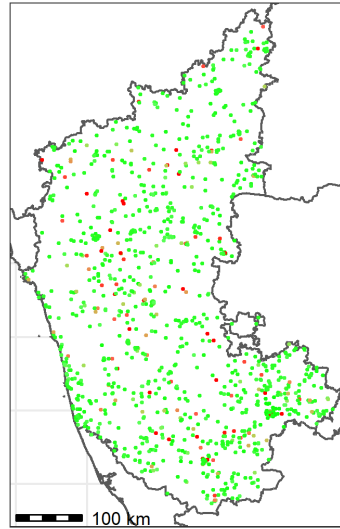

## ARI

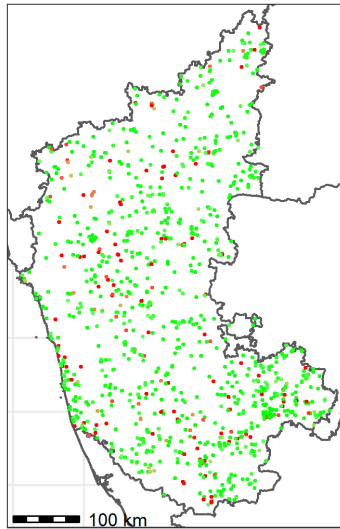

## Wasting

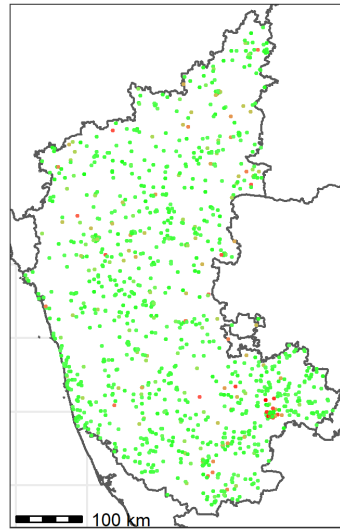

Kenya

Fever

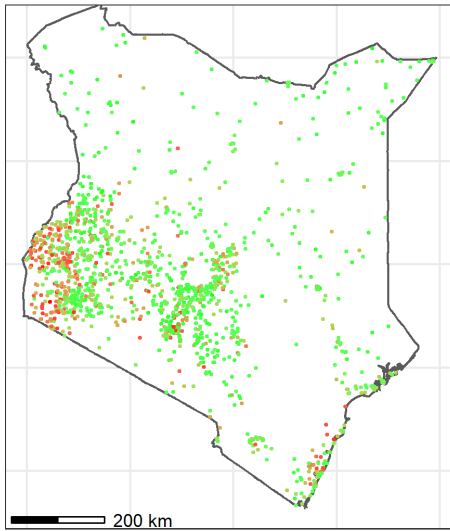

Diarrhoea

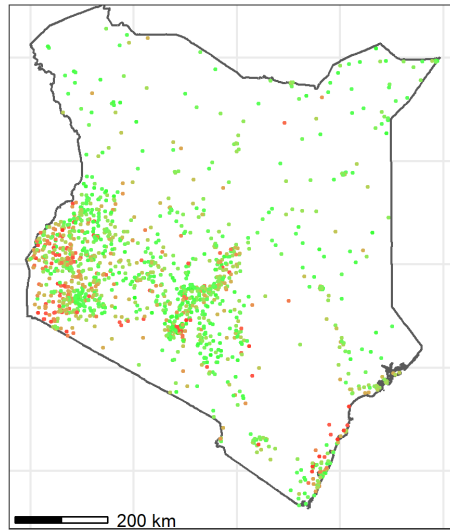

ARI

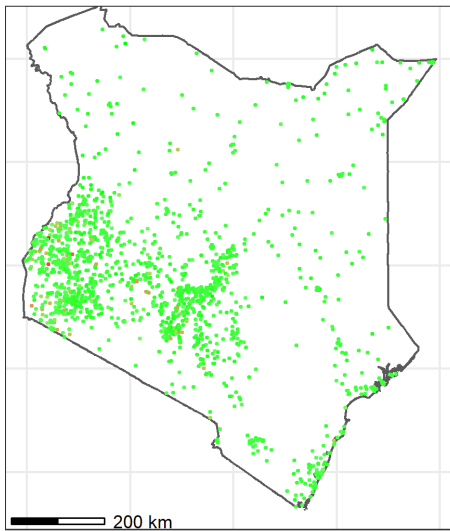

Wasting

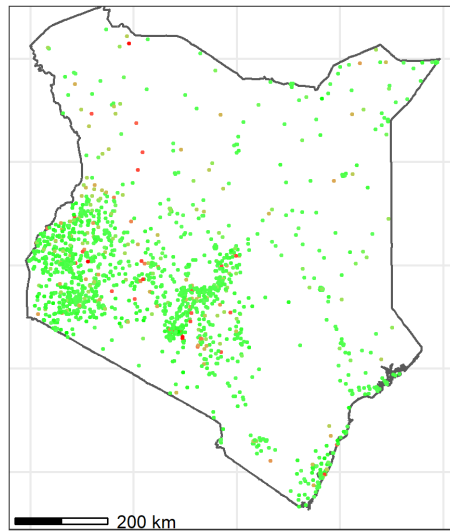

Kerala

Fever

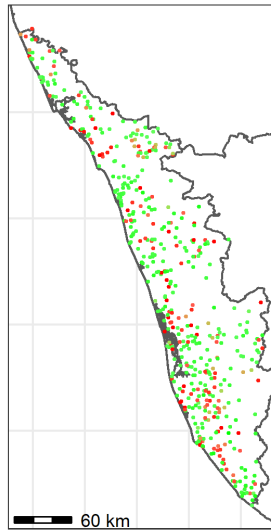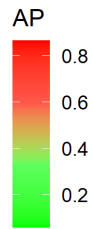

Diarrhoea

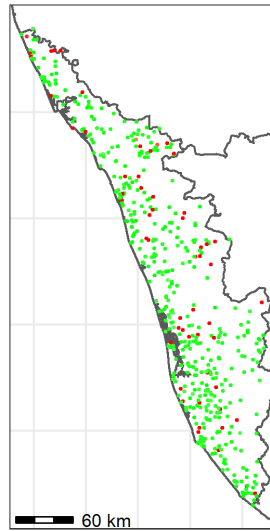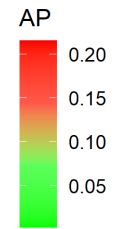

ARI

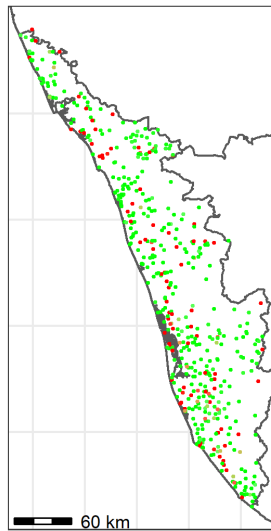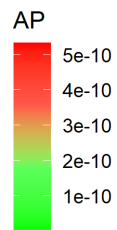

Wasting

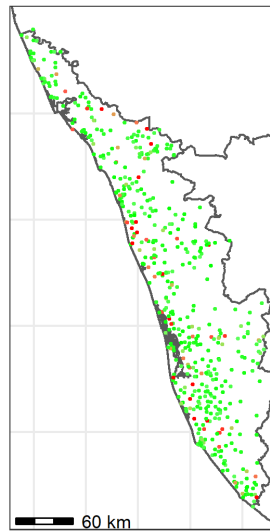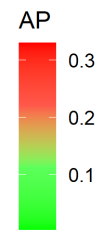

# Lakshadweep

## Fever

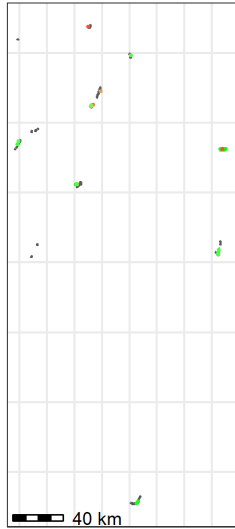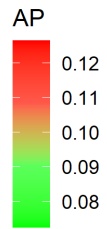

## Diarrhoea

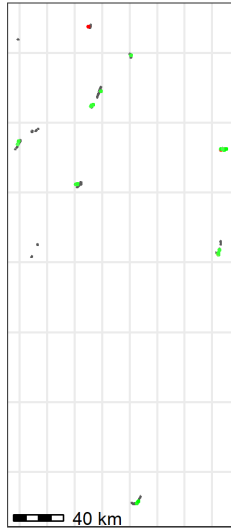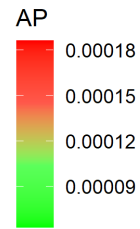

## ARI

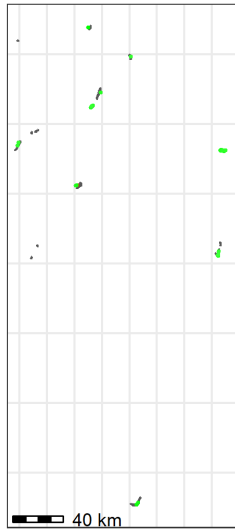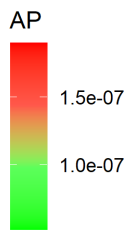

## Wasting

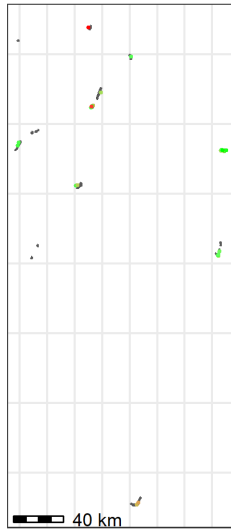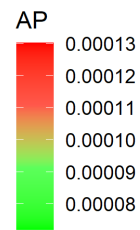

Lesotho

Fever

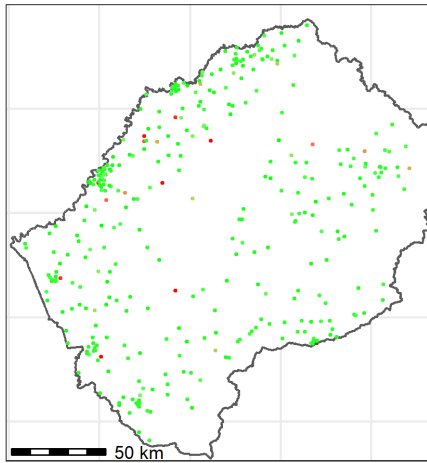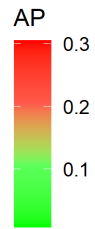

Diarrhoea

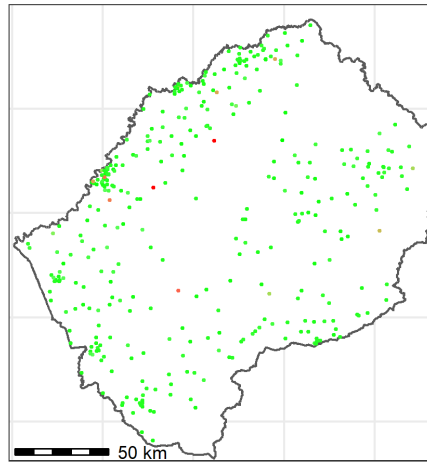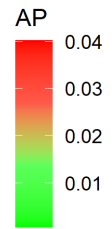

ARI

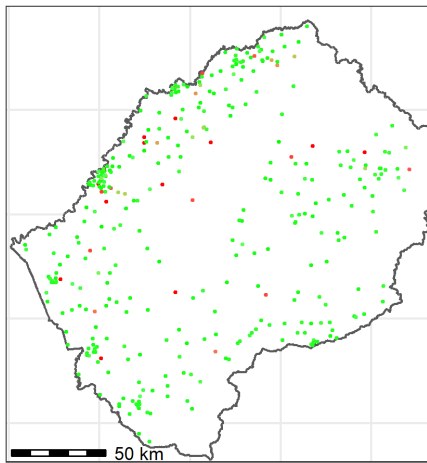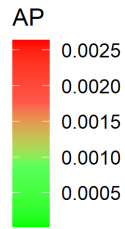

Wasting

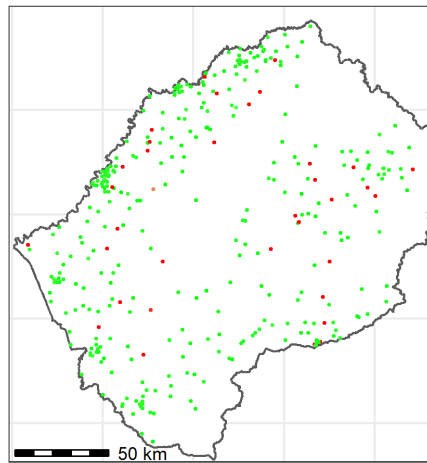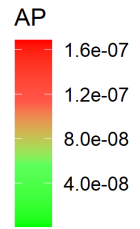

Liberia

Fever

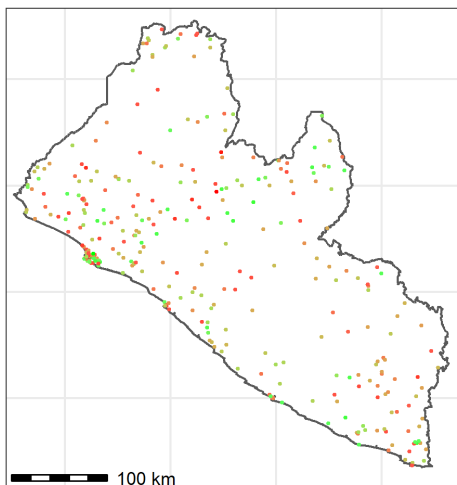

Diarrhoea

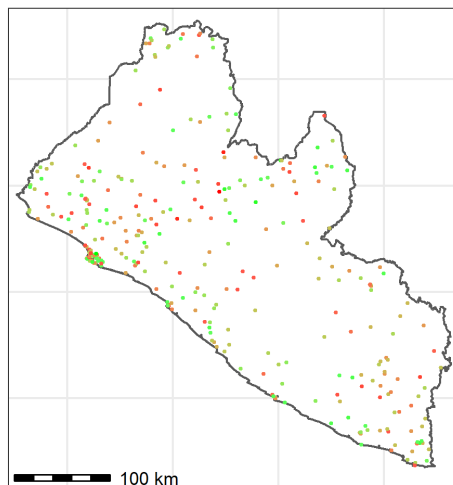

ARI

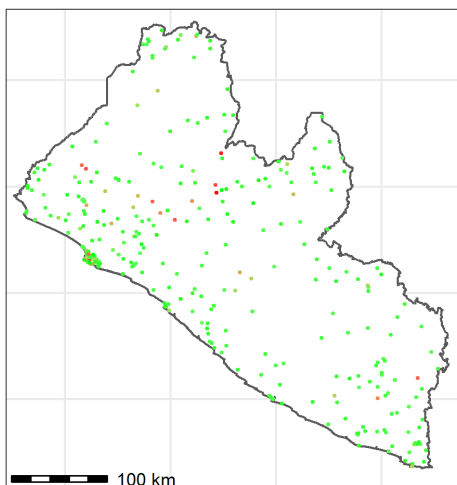

Wasting

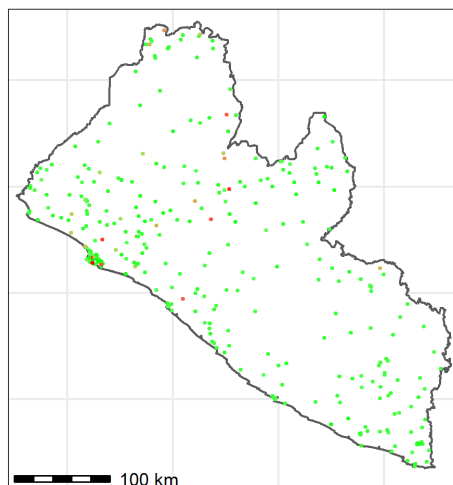



Madhya Pradesh

Fever

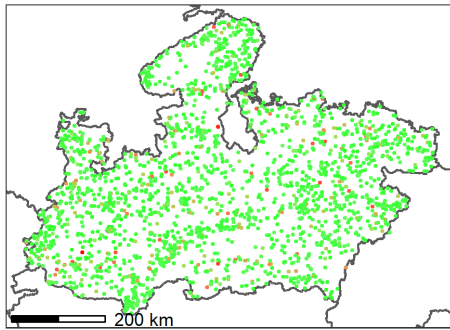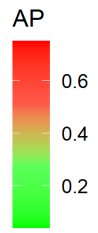

Diarrhoea

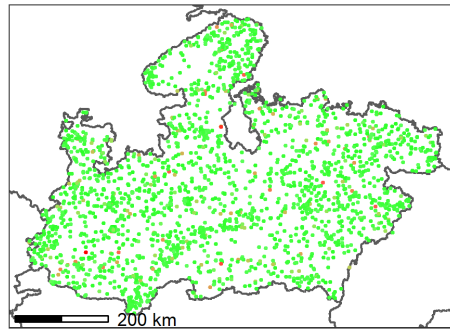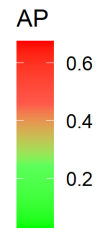

ARI

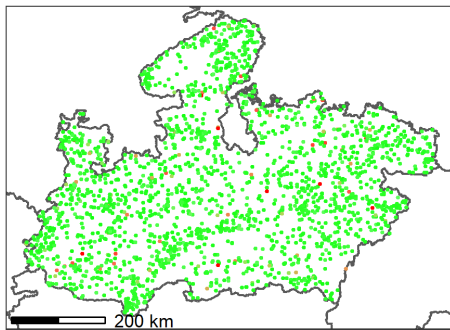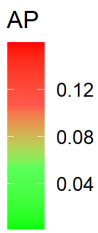

Wasting

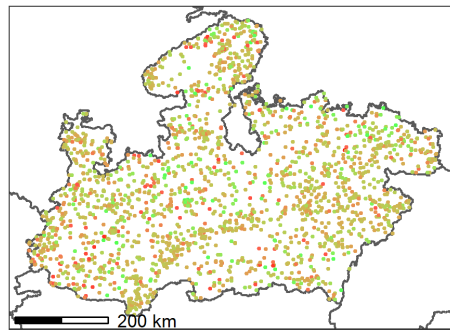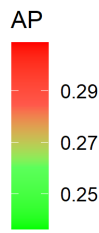

## Arunachal Pradesh

### Fever

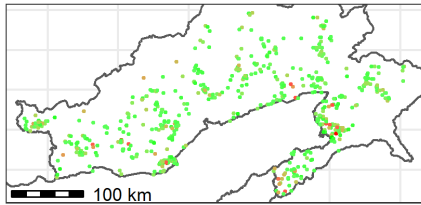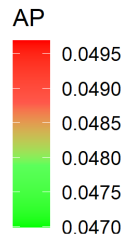

### Diarrhoea

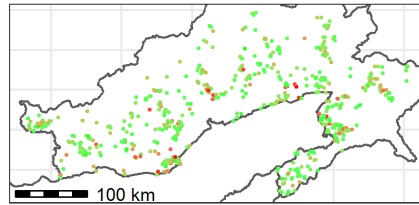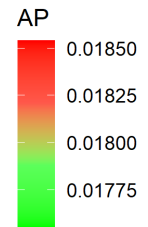

### ARI

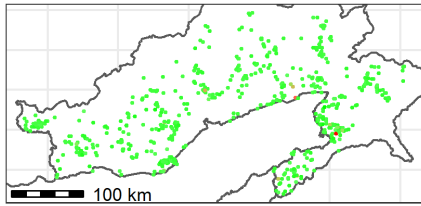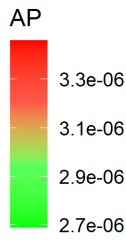

### Wasting

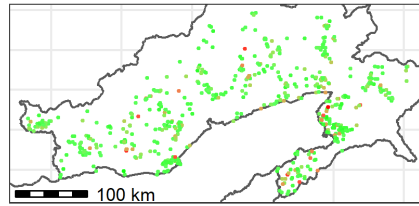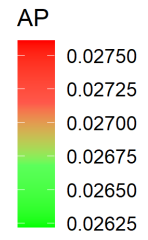

# Maharashtra

## Fever

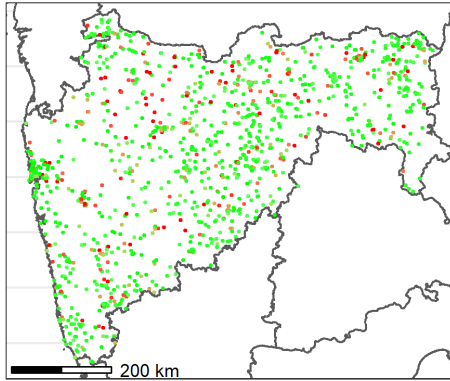

## Diarrhoea

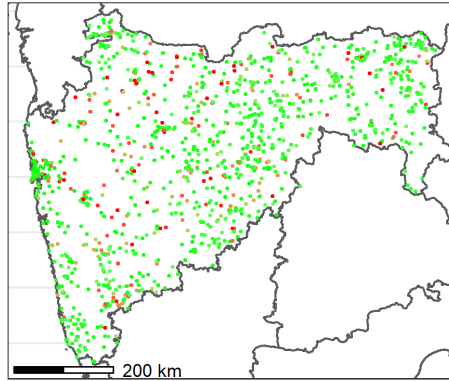

## ARI

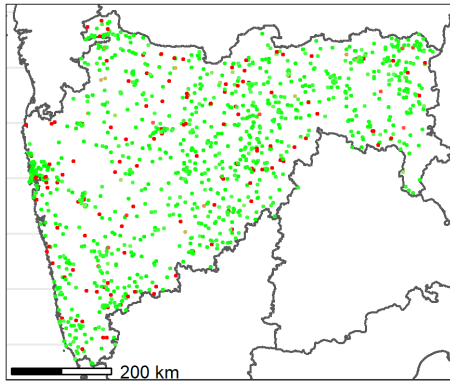

## Wasting

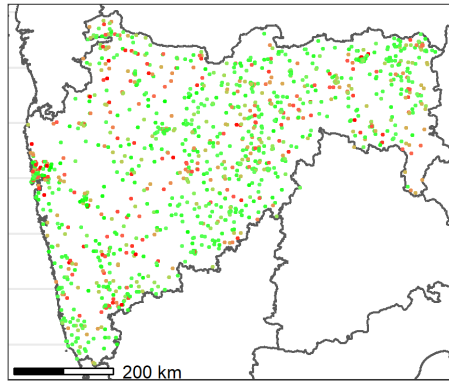

Malawi

Fever

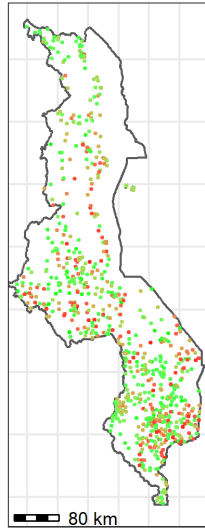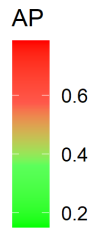

Diarrhoea

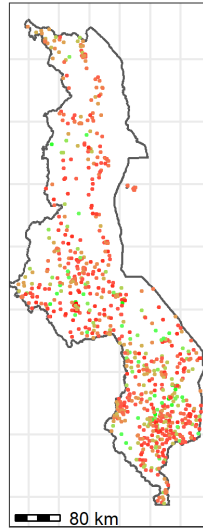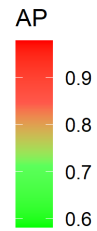

ARI

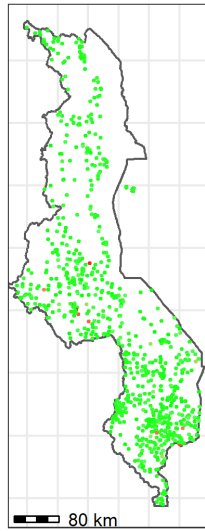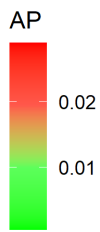

Wasting

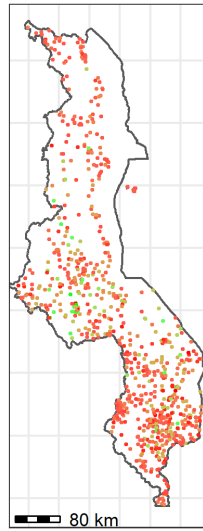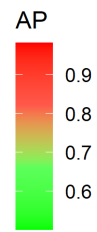

Mali

Fever

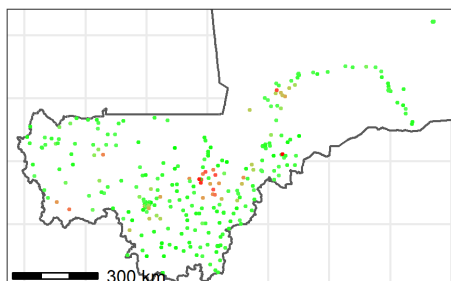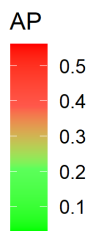

Diarrhoea

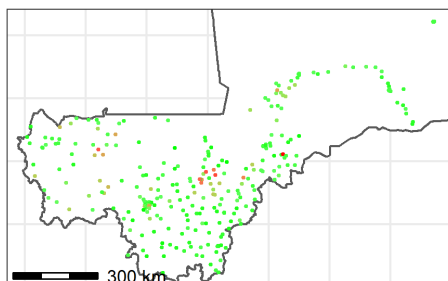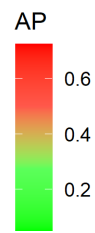

ARI

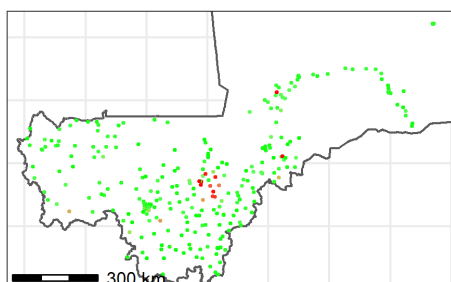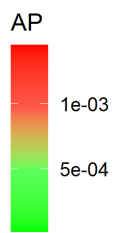

Wasting

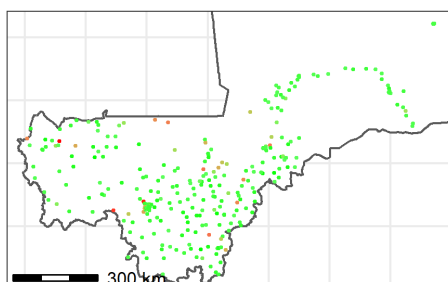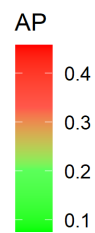

Manipur

Fever

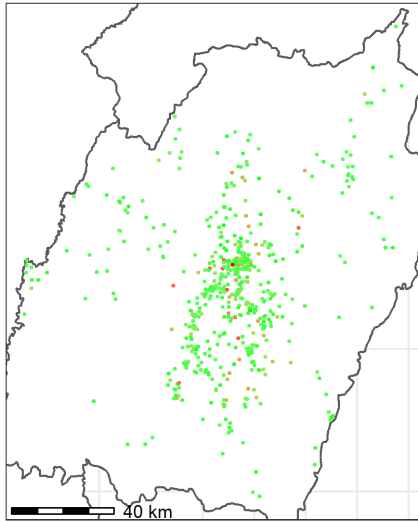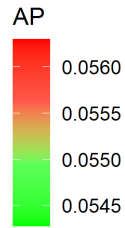

Diarrhoea

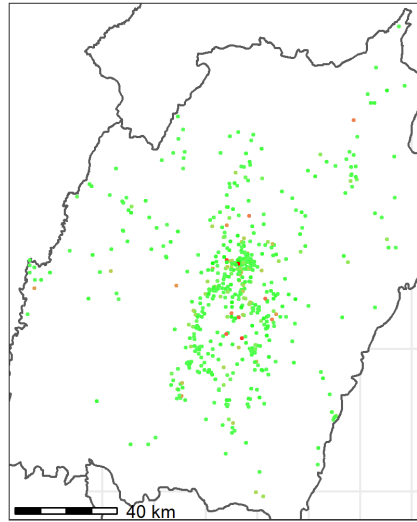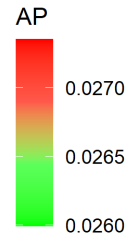

ARI

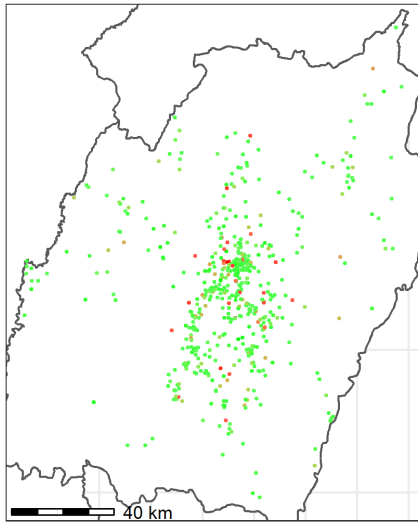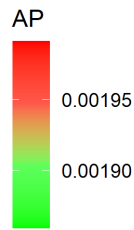

Wasting

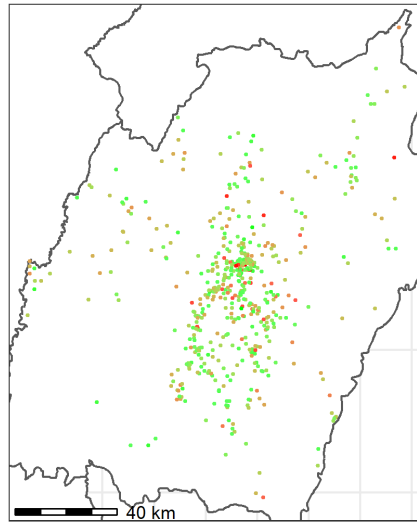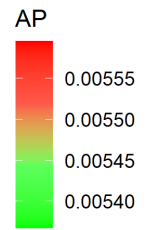

# Meghalaya

## Fever

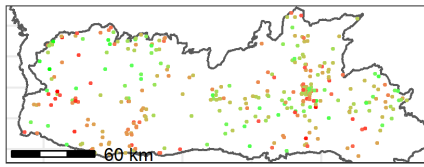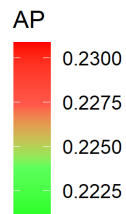

## Diarrhoea

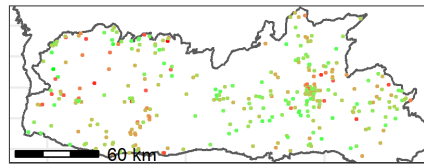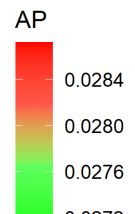

## ARI

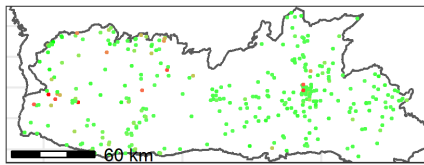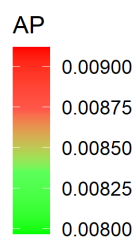

## Wasting

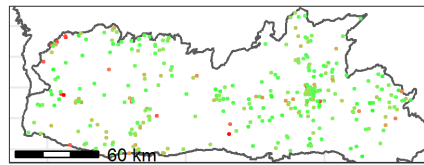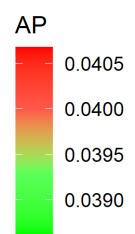

Mizoram

Fever

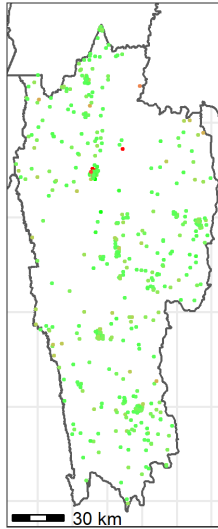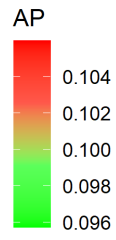

Diarrhoea

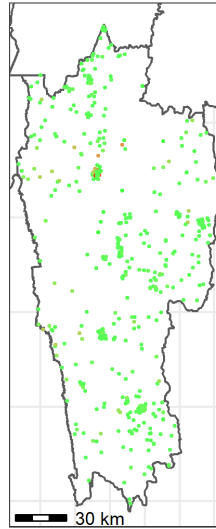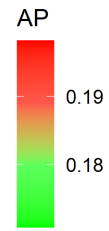

ARI

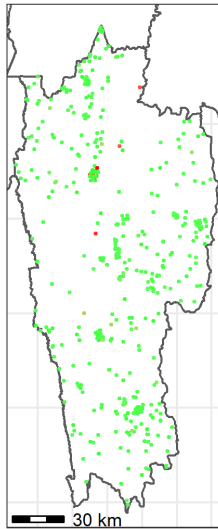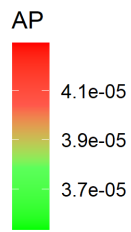

Wasting

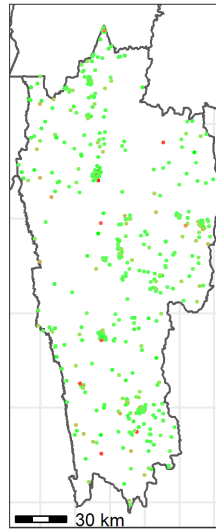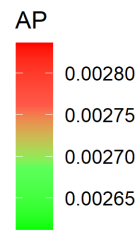



Mozambique

Fever

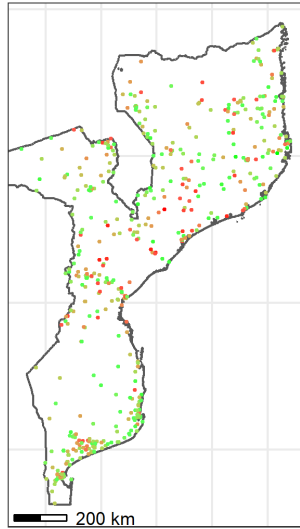

Diarrhoea

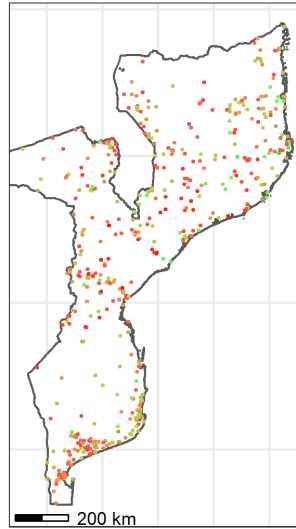

ARI

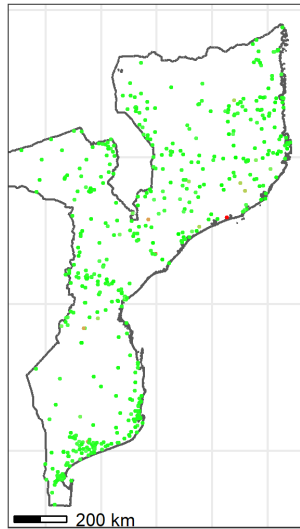

Wasting

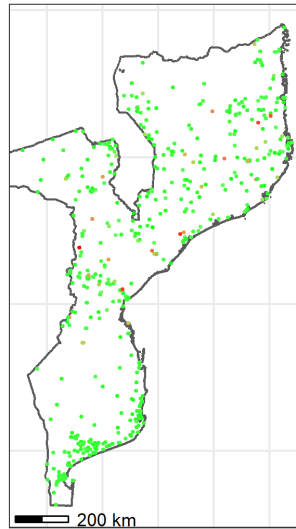

Myanmar

Fever

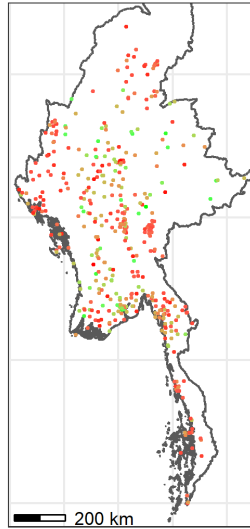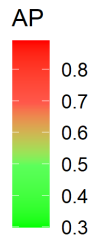

Diarrhoea

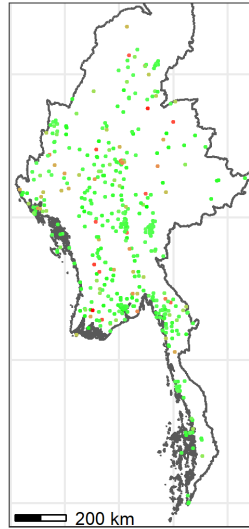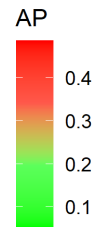

ARI

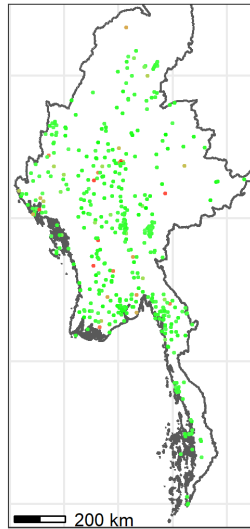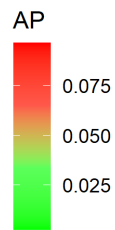

Wasting

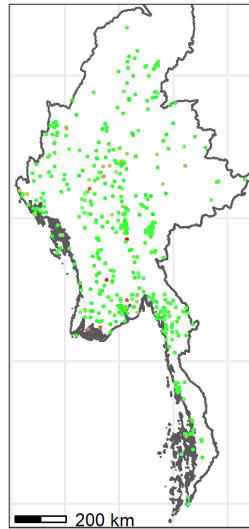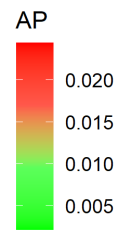

# Nagaland

## Fever

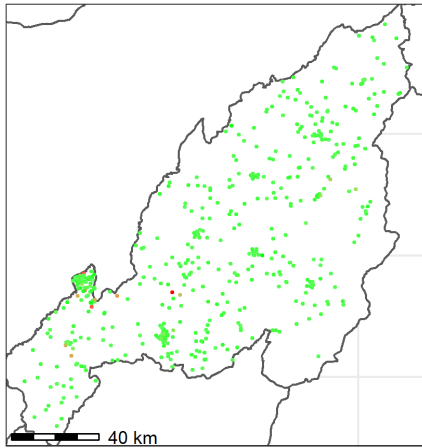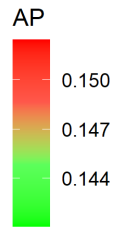

## Diarrhoea

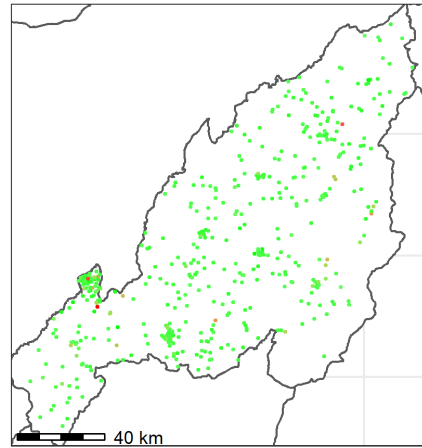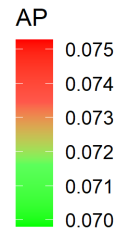

## ARI

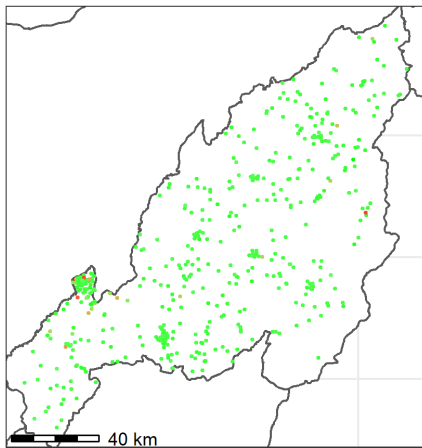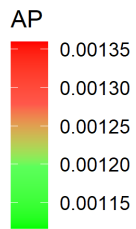

## Wasting

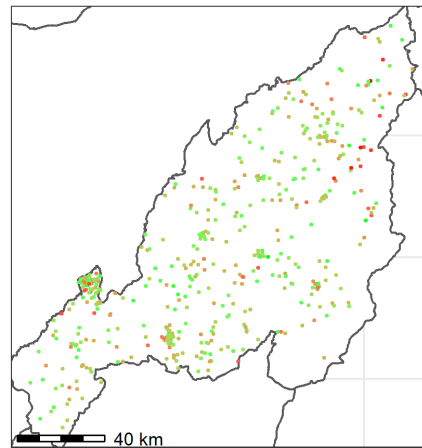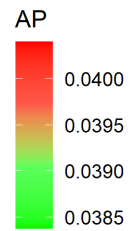

Namibia

Fever

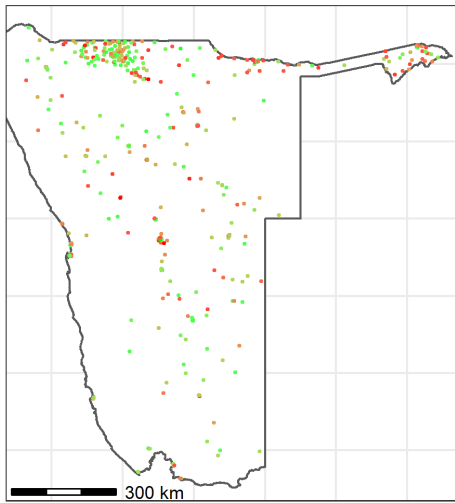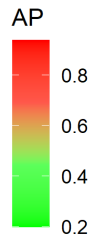

Diarrhoea

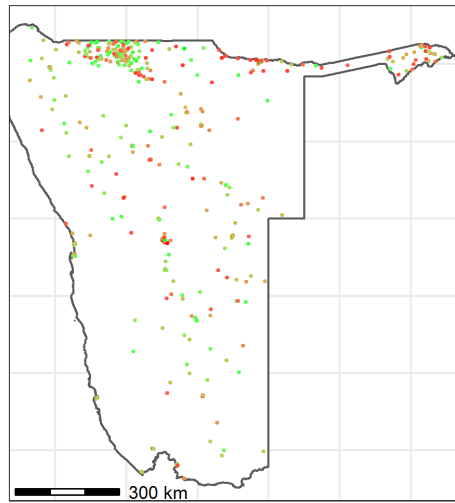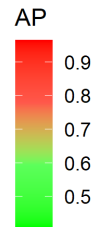

ARI

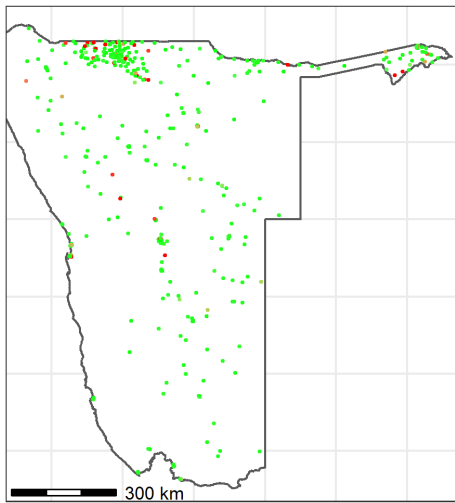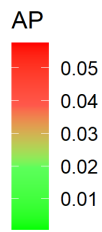

Wasting

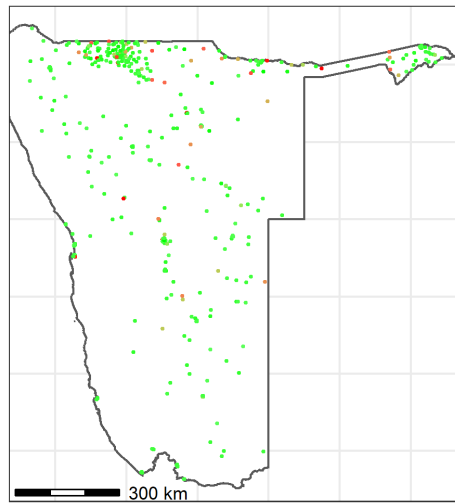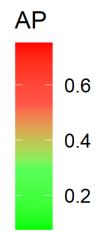

Assam

Fever

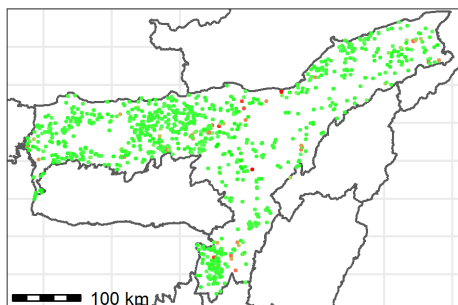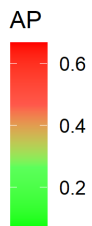

Diarrhoea

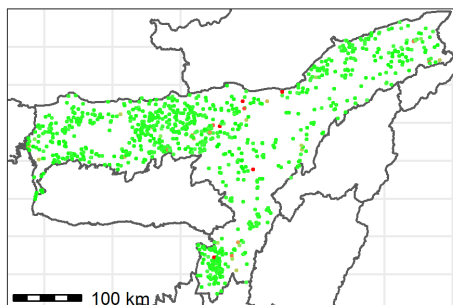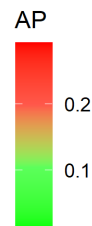

ARI

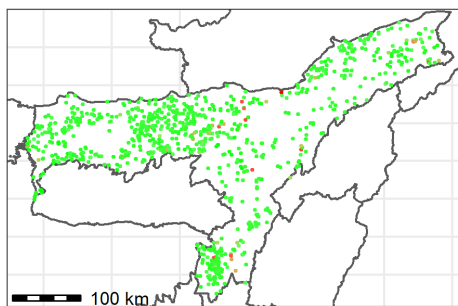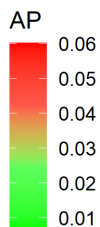

Wasting

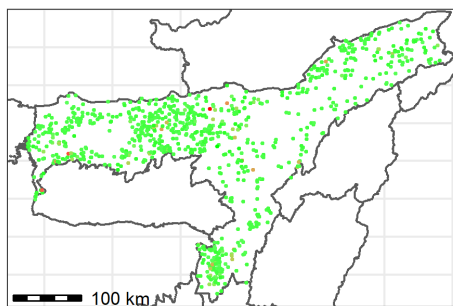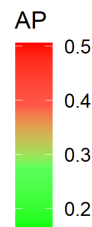

NCT of Delhi

Fever

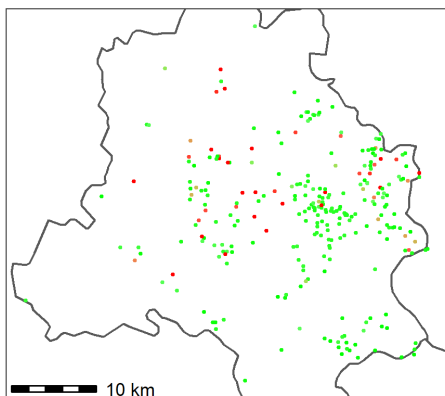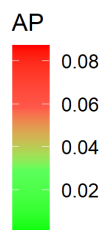

Diarrhoea

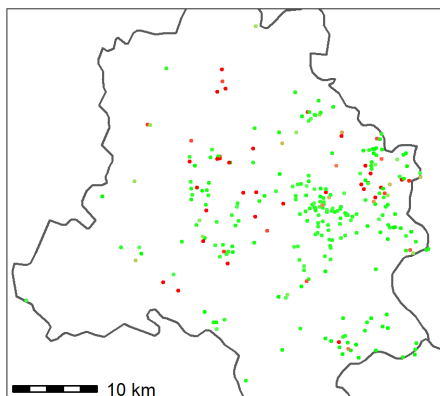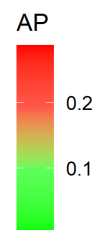

ARI

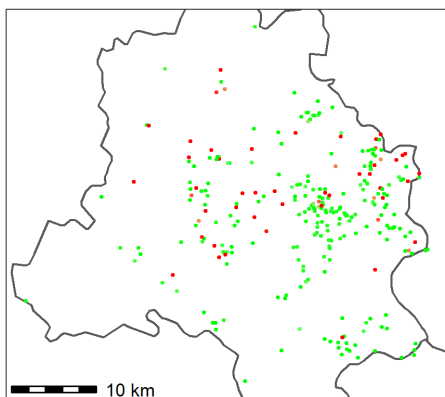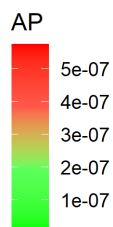

Wasting

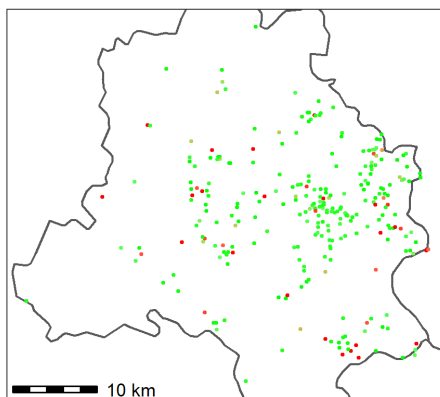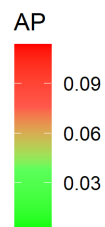

# Nepal

## Fever

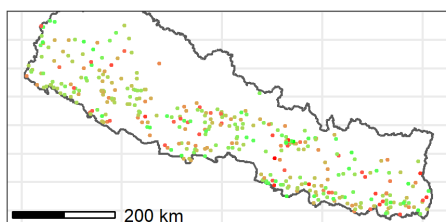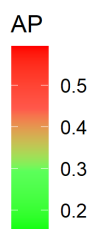

## Diarrhoea

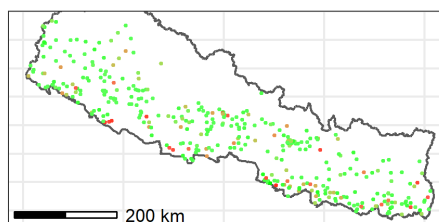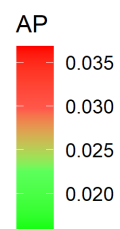

## ARI

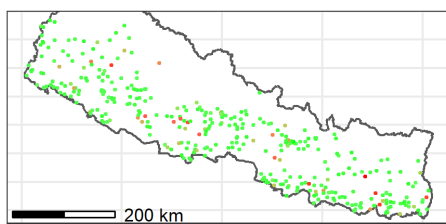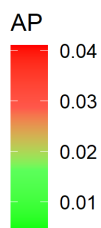

## Wasting

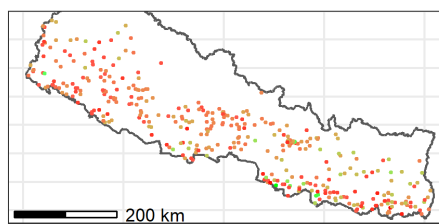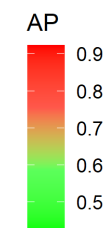

Nigeria

Fever

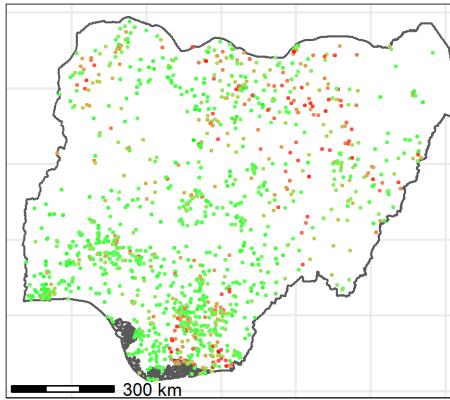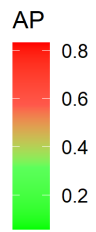

Diarrhoea

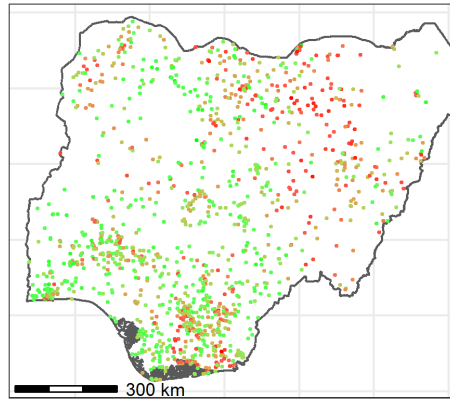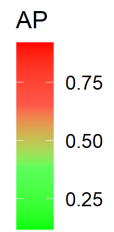

ARI

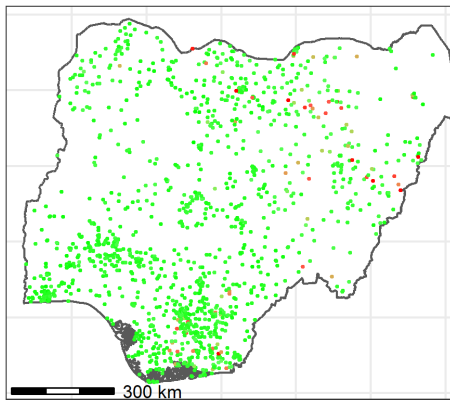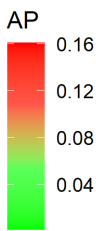

Wasting

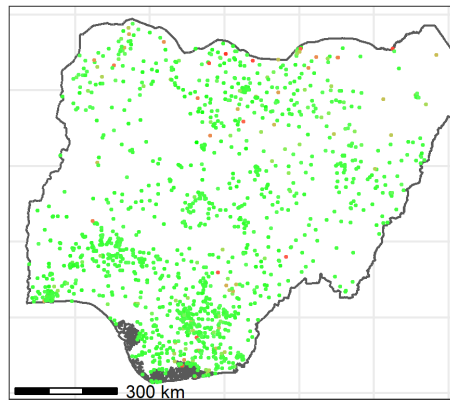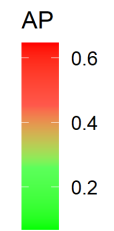



Odisha

Fever

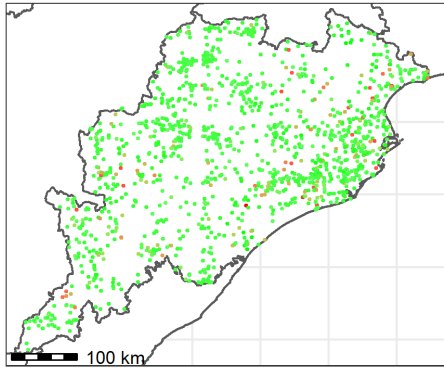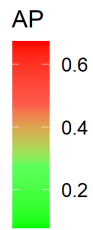

Diarrhoea

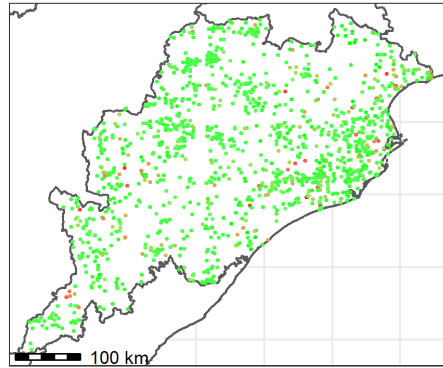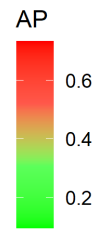

ARI

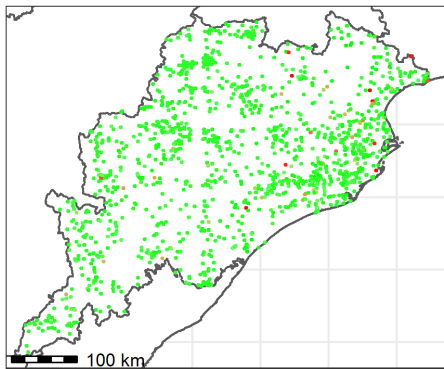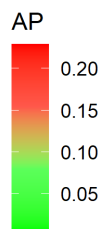

Wasting

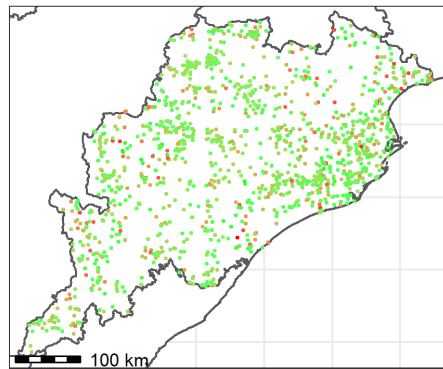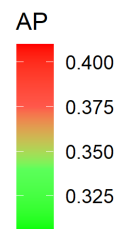

Pakistan

Fever

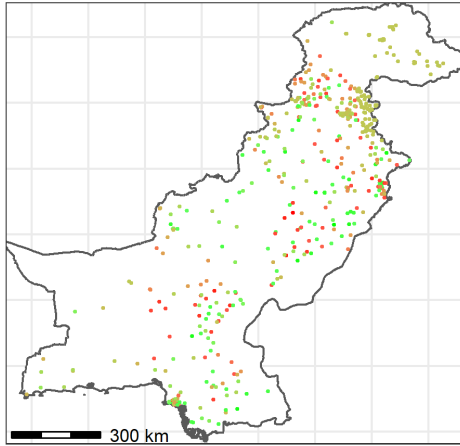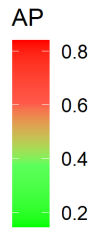

Diarrhoea

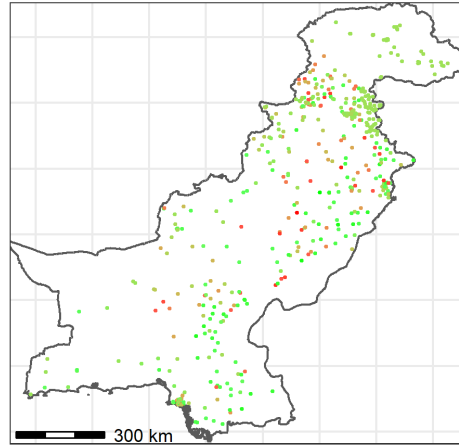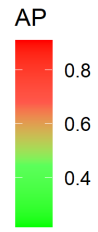

ARI

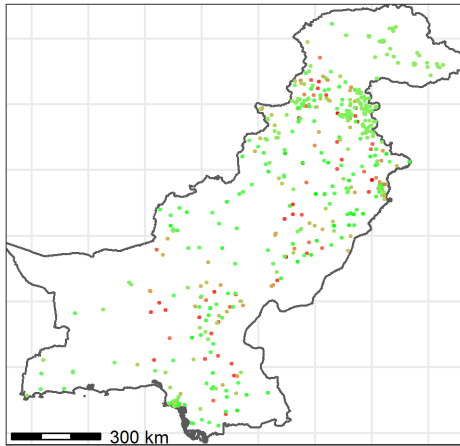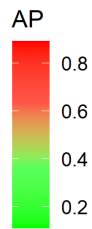

Wasting

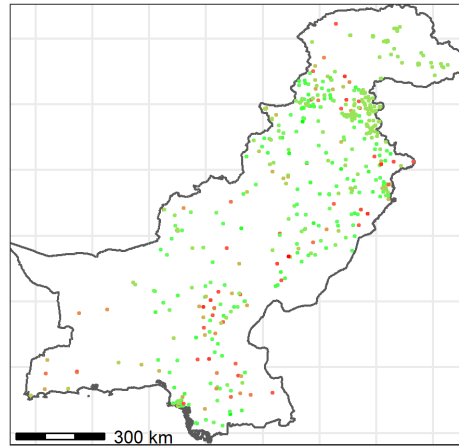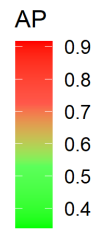

Puducherry

Fever

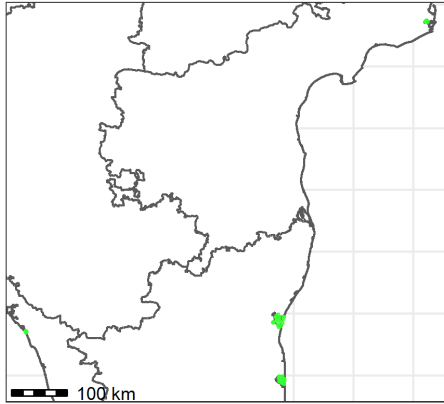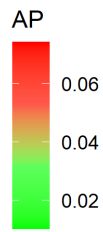

Diarrhoea

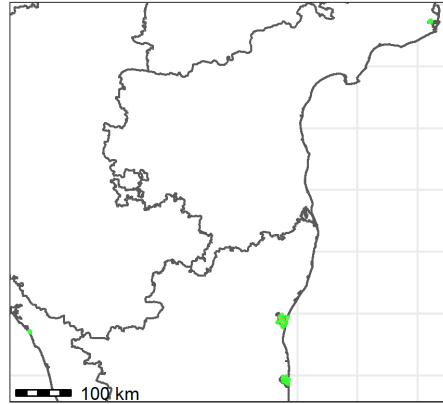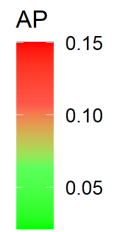

ARI

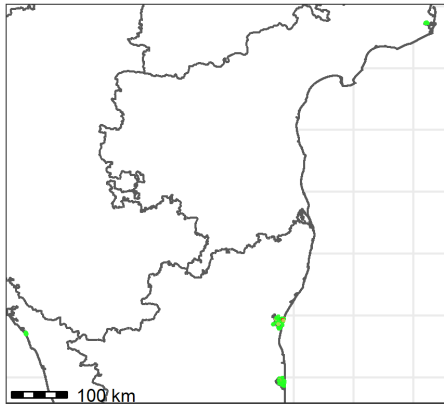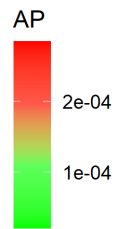

Wasting

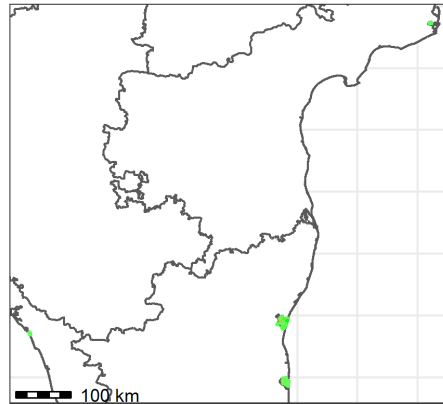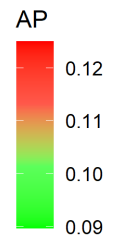

Punjab

Fever

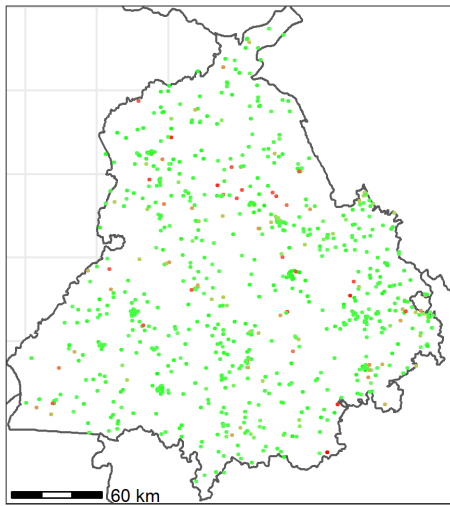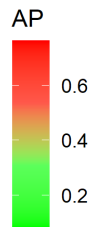

Diarrhoea

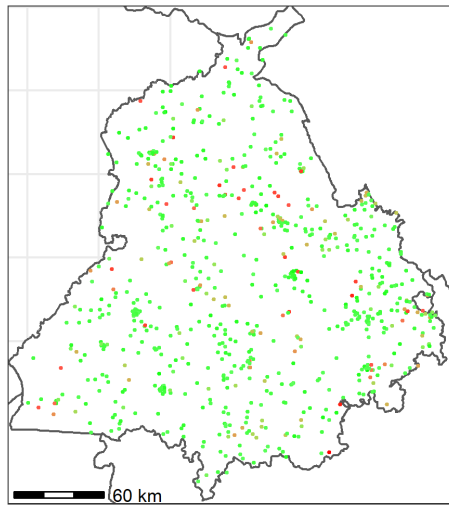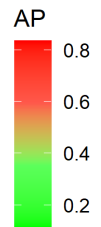

ARI

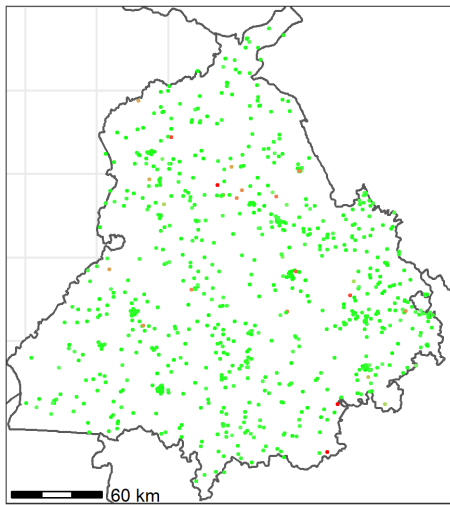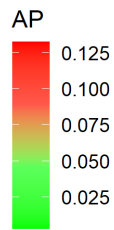

Wasting

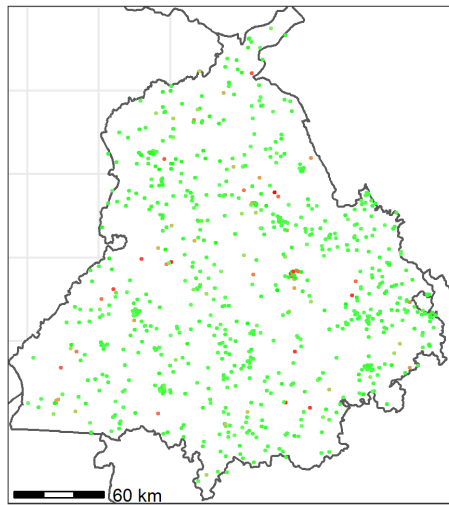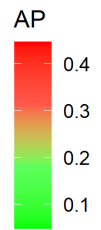

# Rajasthan

## Fever

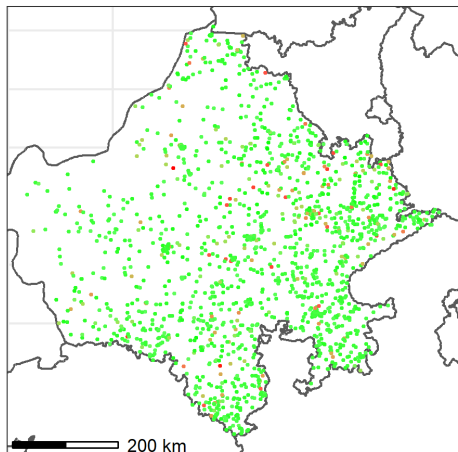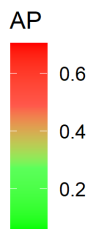

## Diarrhoea

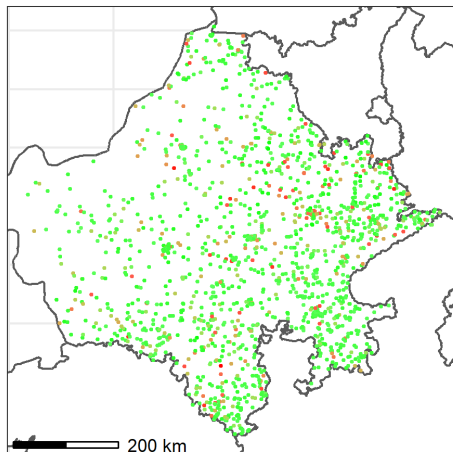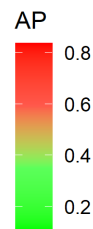

## ARI

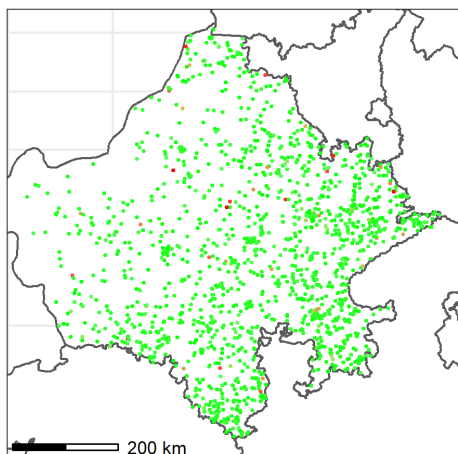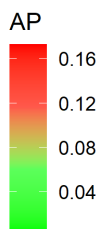

## Wasting

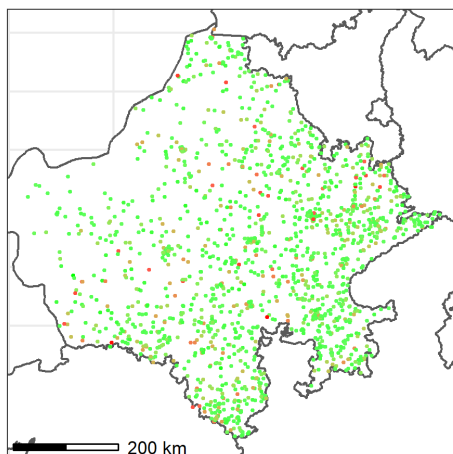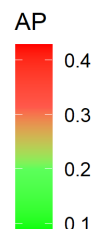

Rwanda

Fever

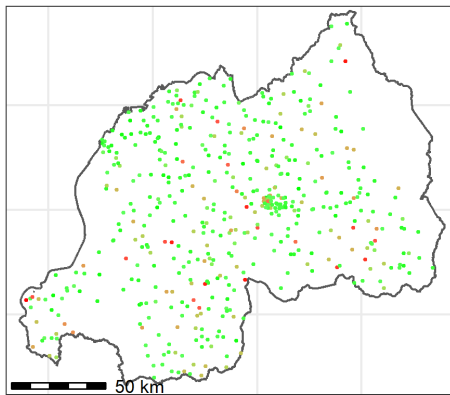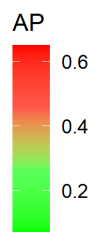

Diarrhoea

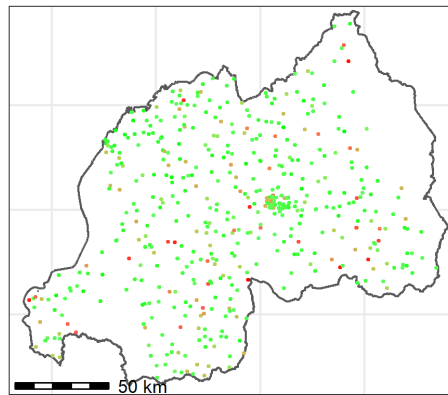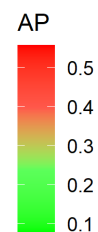

ARI

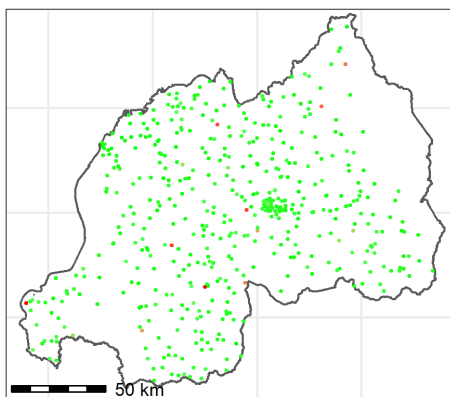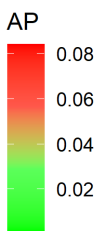

Wasting

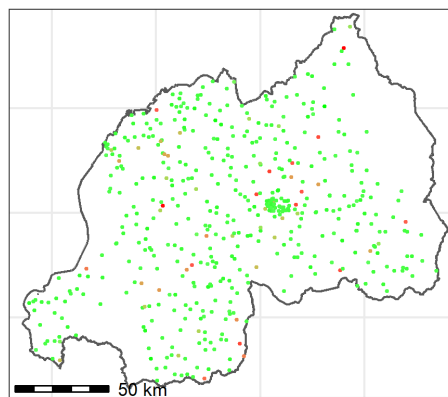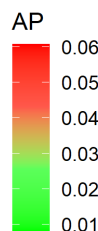

# Senegal

## Fever

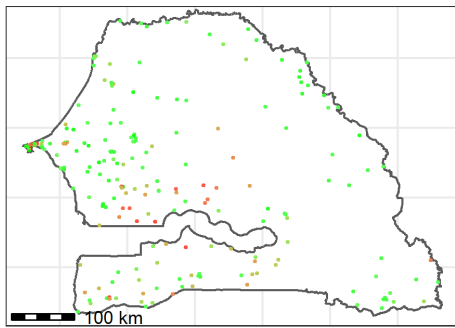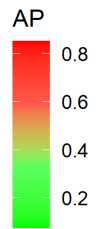

## Diarrhoea

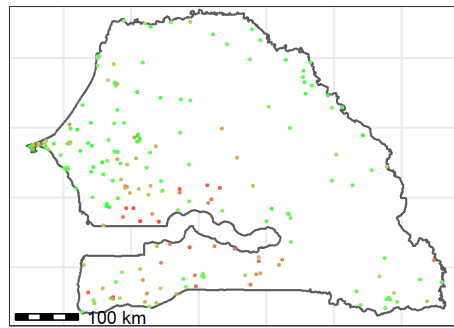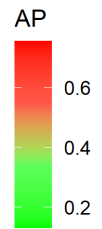

## ARI

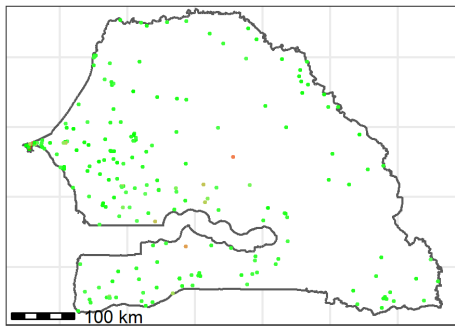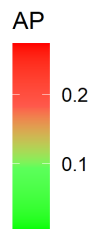

## Wasting

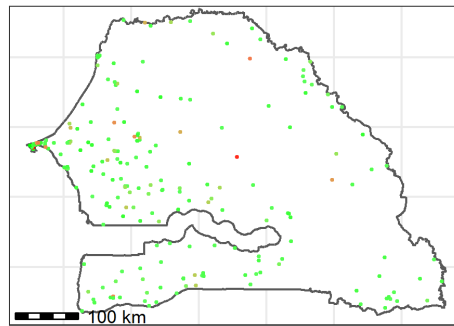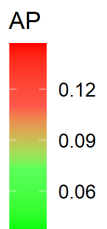

Bangladesh

Fever

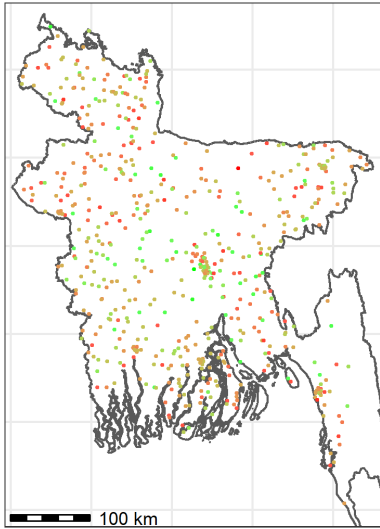

Diarrhoea

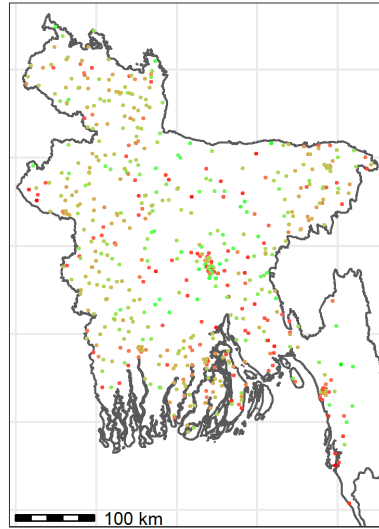

ARI

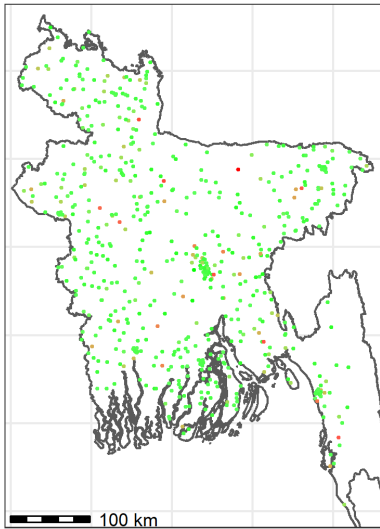

Wasting

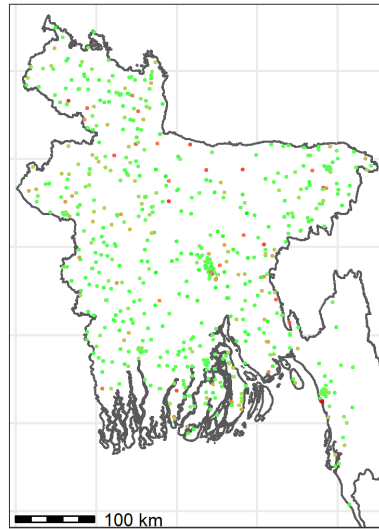



# Sierra Leone

## Fever

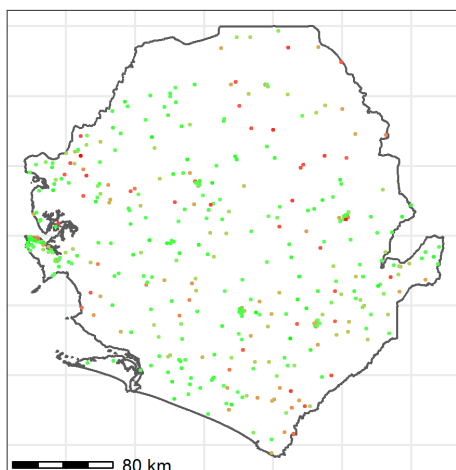

## Diarrhoea

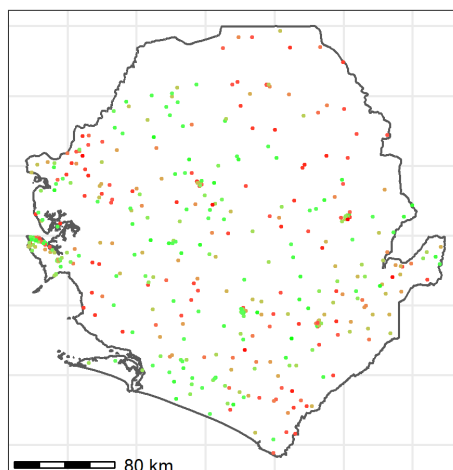

## ARI

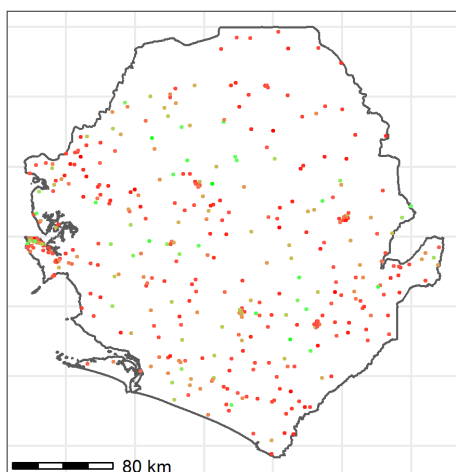

## Wasting

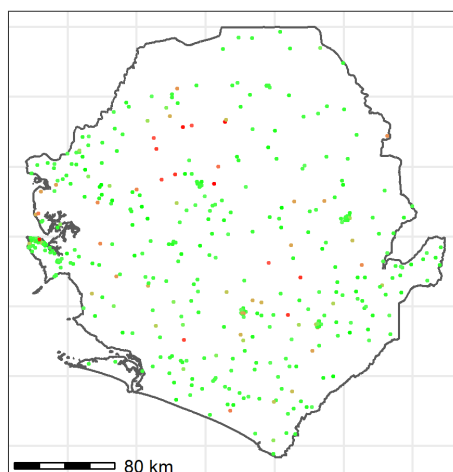

# Sikkim

## Fever

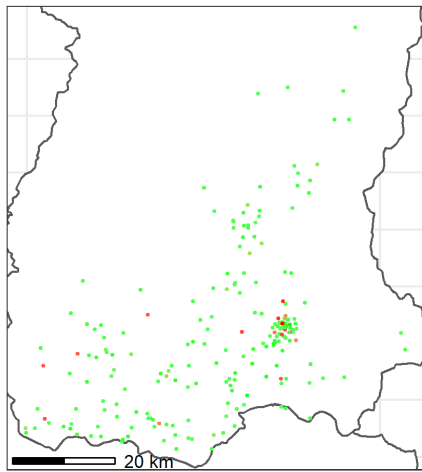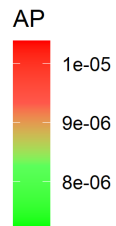

## Diarrhoea

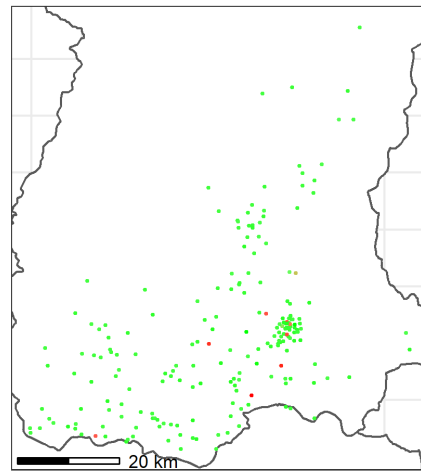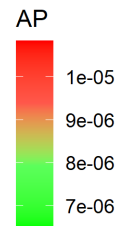

## ARI

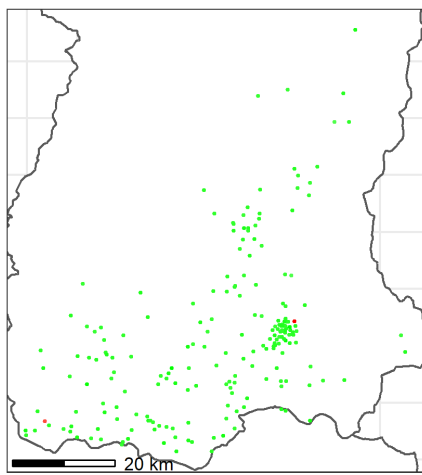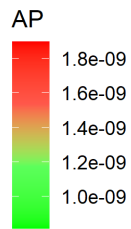

## Wasting

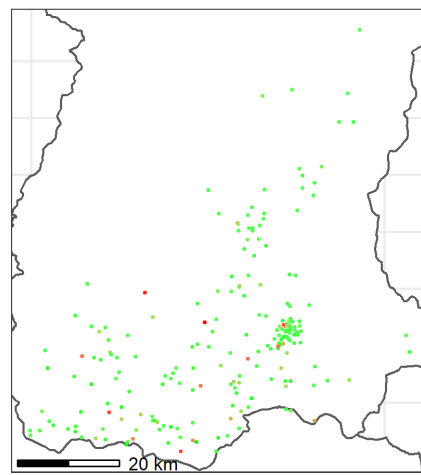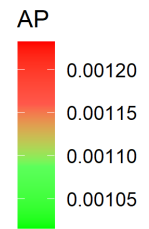

# South Africa

## Fever

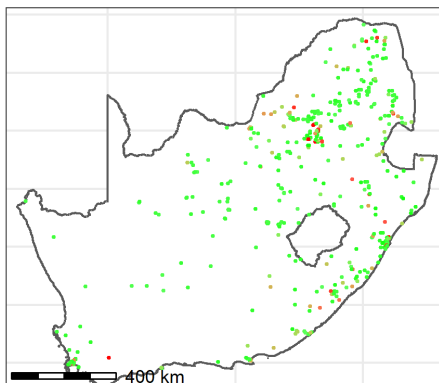

## Diarrhoea

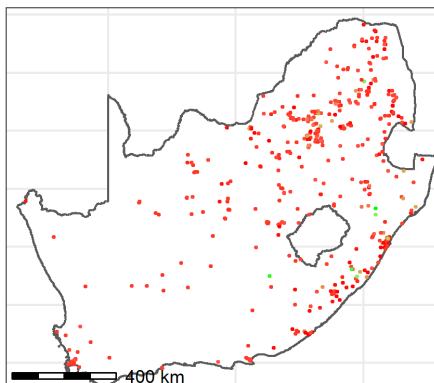

## ARI

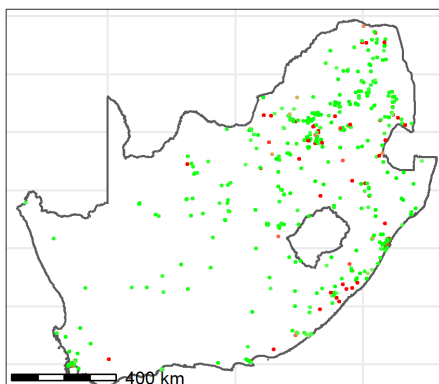

## Wasting

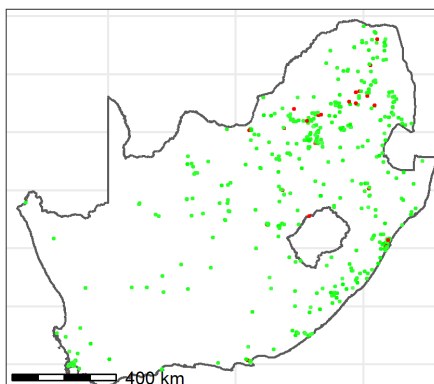

Tamil Nadu

Fever

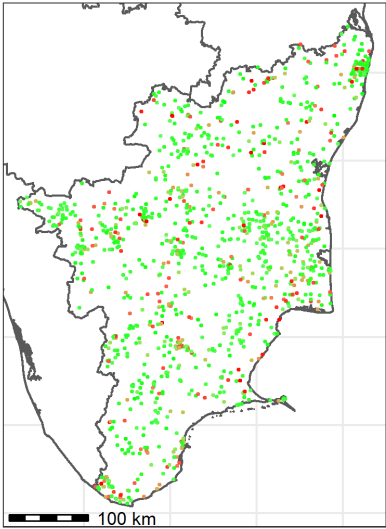

Diarrhoea

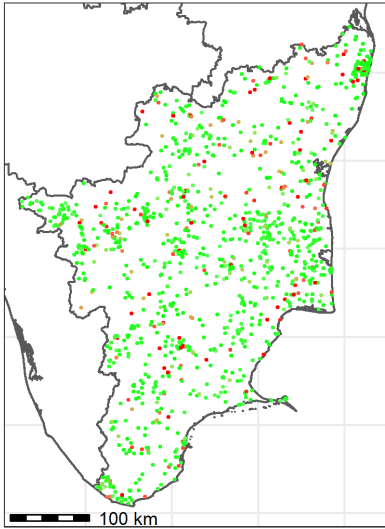

ARI

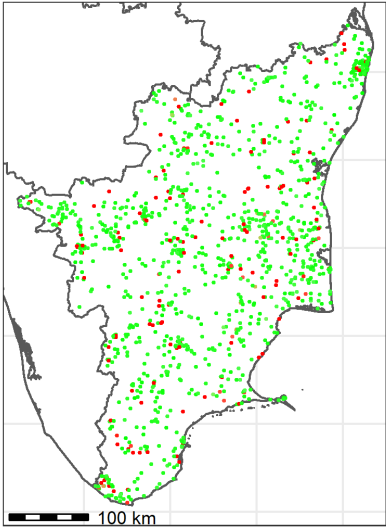

Wasting

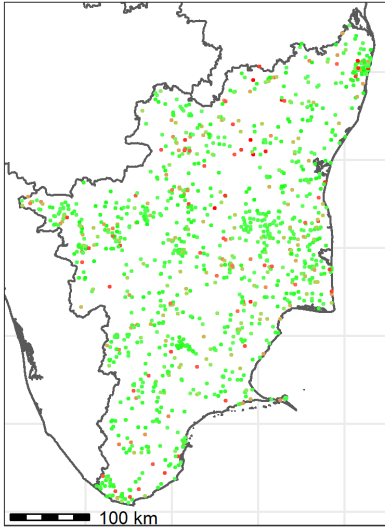

Tanzania

Fever

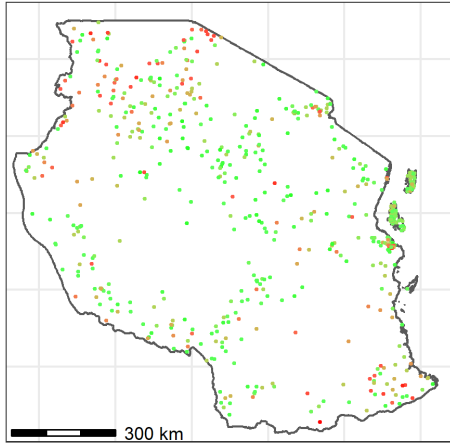

Diarrhoea

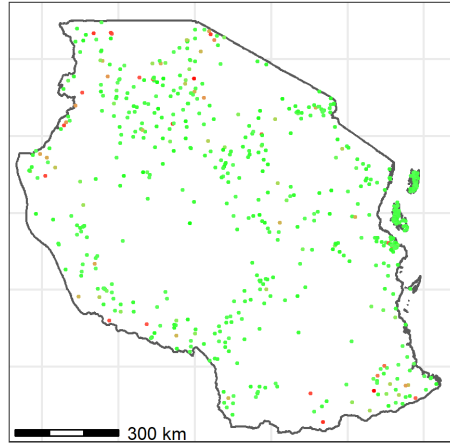

ARI

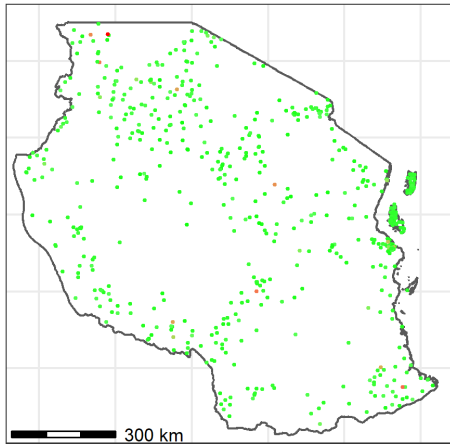

Wasting

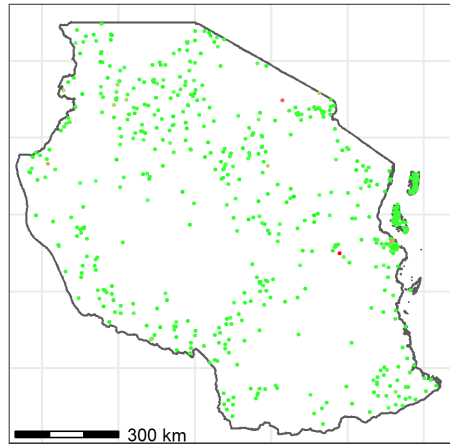

Telangana

Fever

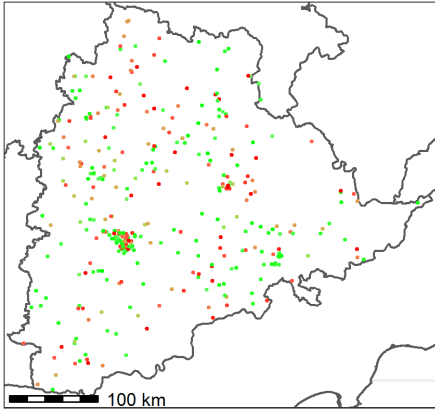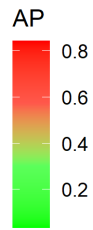

Diarrhoea

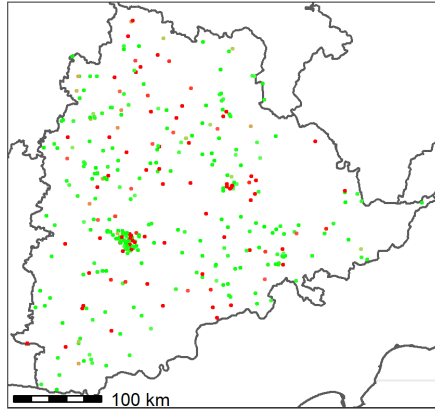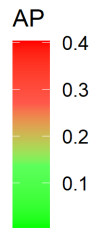

ARI

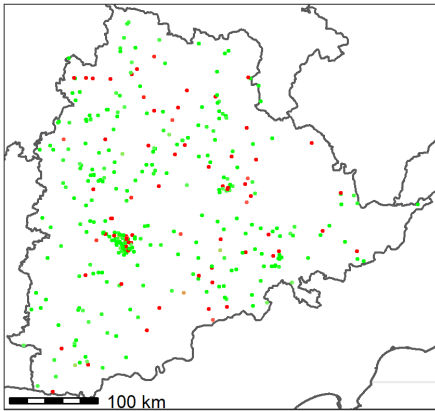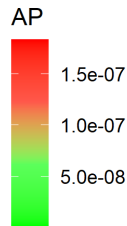

Wasting

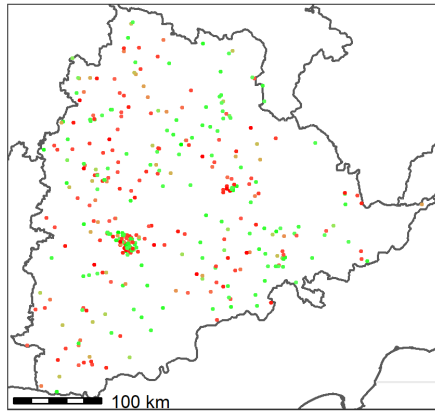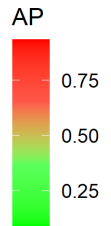

Timor-Leste

Fever

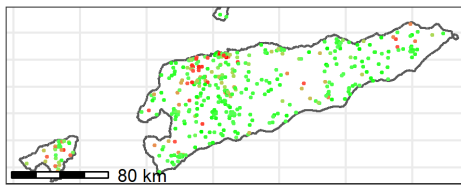

AP

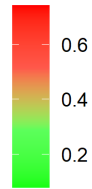

Diarrhoea

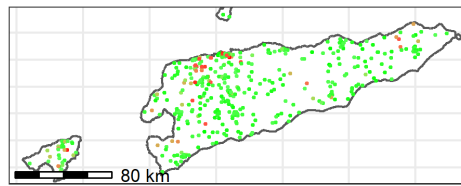

AP

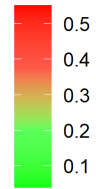

ARI

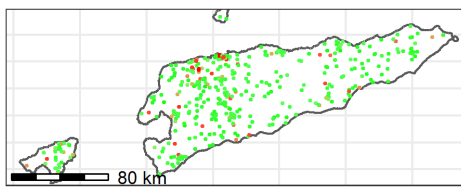

AP

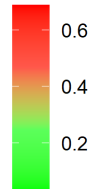

Wasting

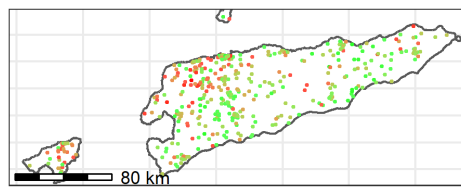

AP

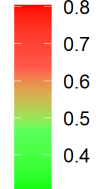

Togo

Fever

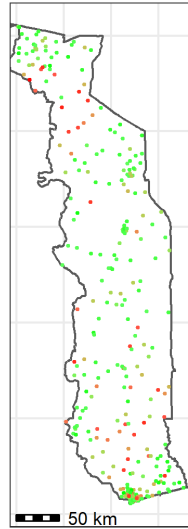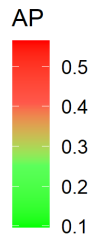

Diarrhoea

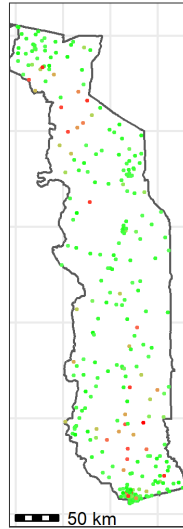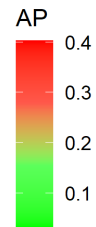

ARI

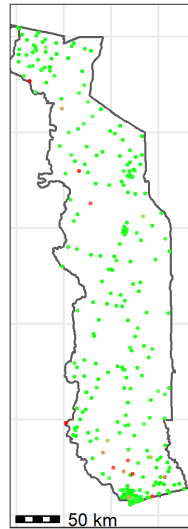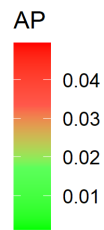

Wasting

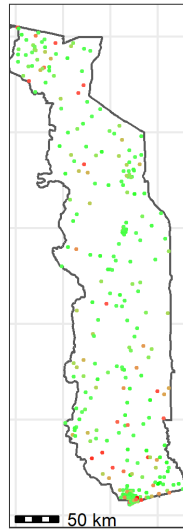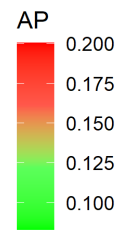



Tripura

Fever

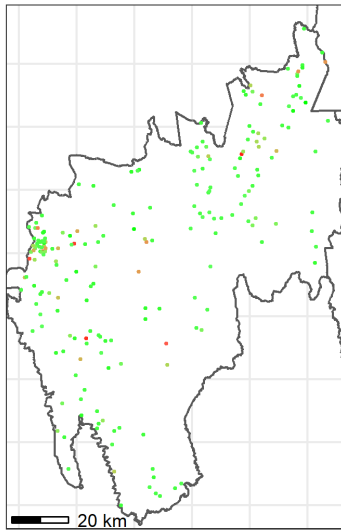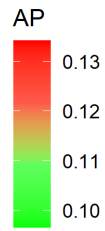

Diarrhoea

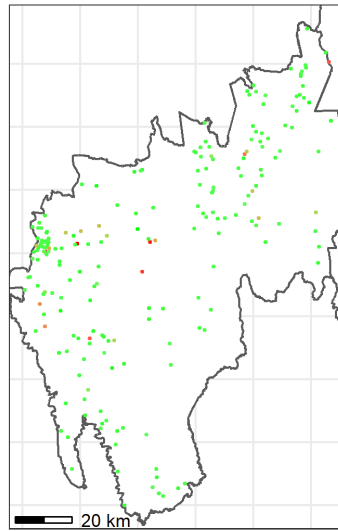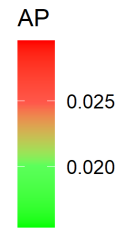

ARI

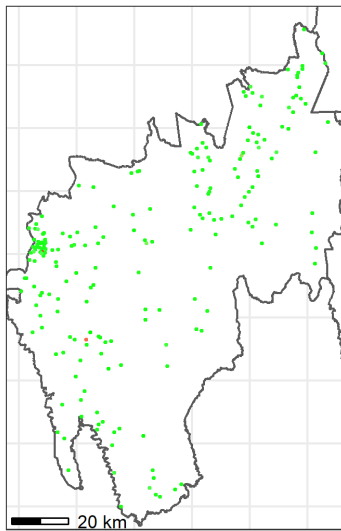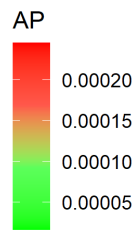

Wasting

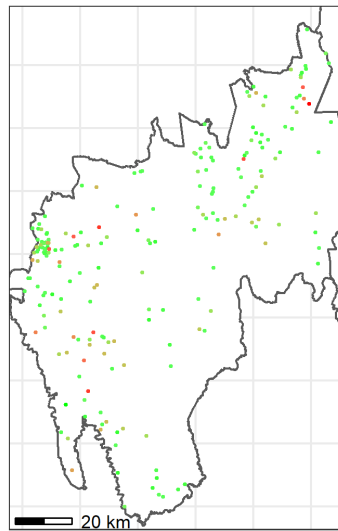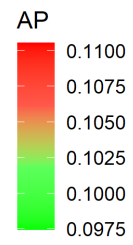

Uganda

Fever

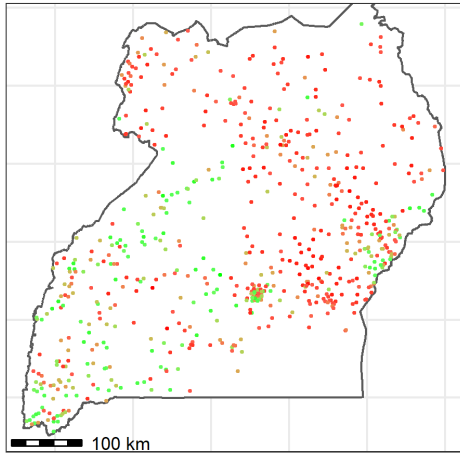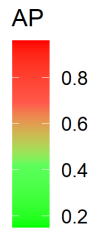

Diarrhoea

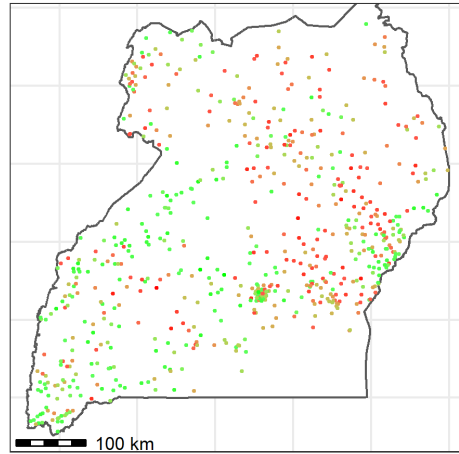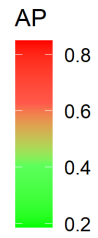

ARI

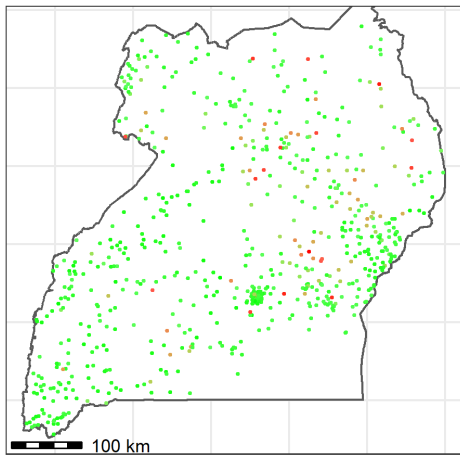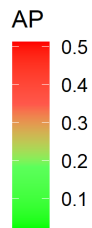

Wasting

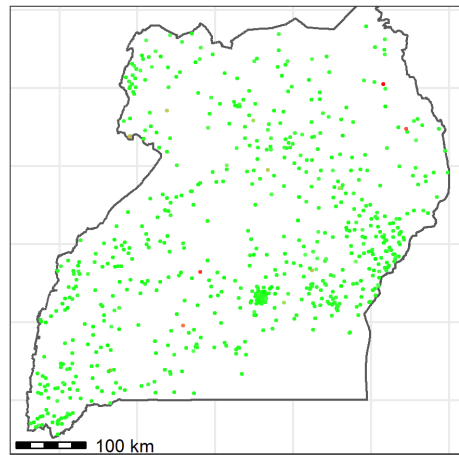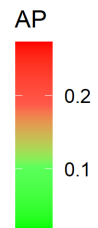

Benin

Fever

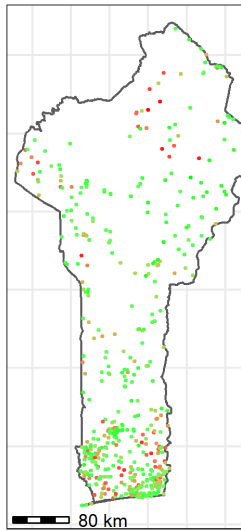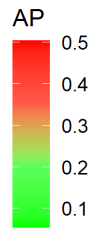

Diarrhoea

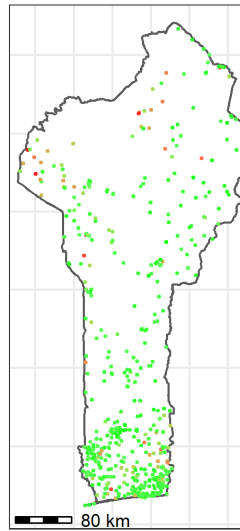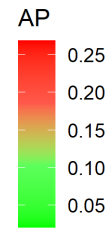

ARI

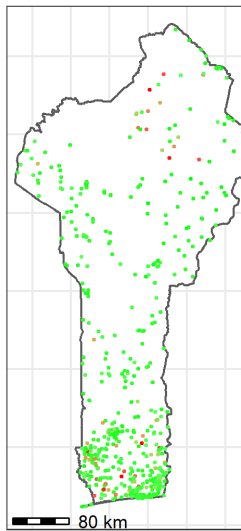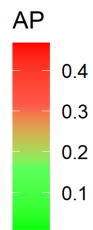

Wasting

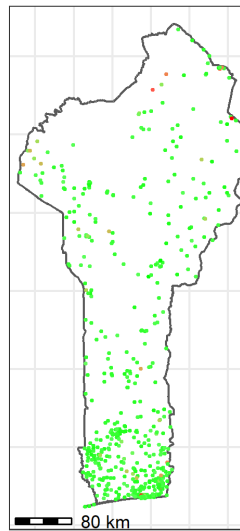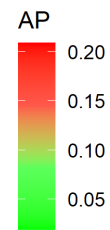

Uttar Pradesh

Fever

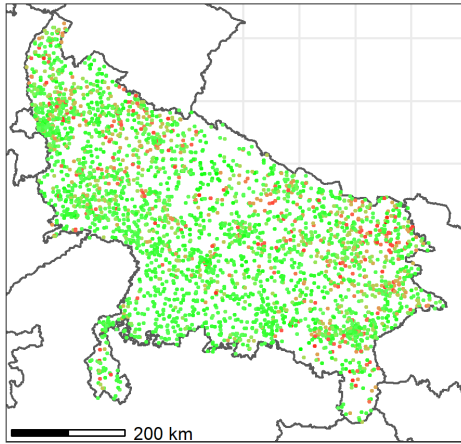

Diarrhoea

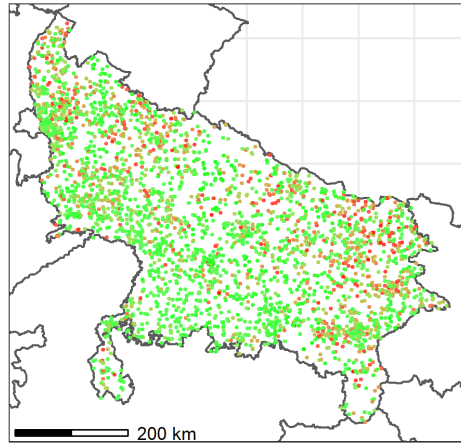

ARI

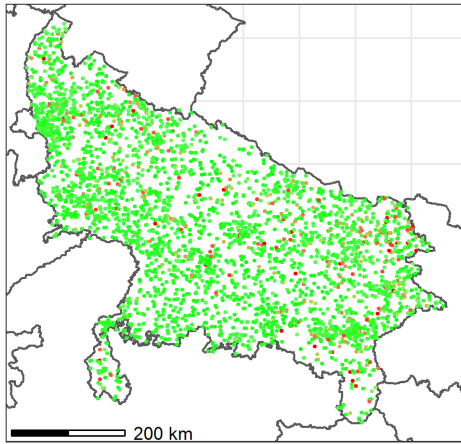

Wasting

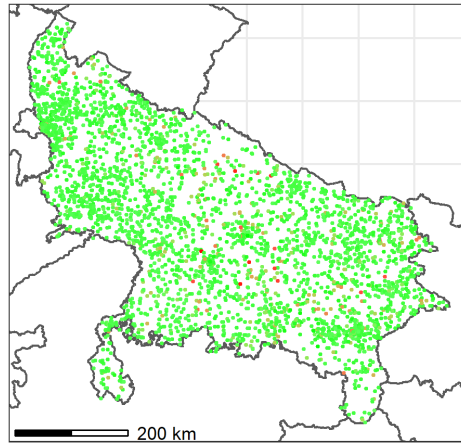

Uttarakhand

Fever

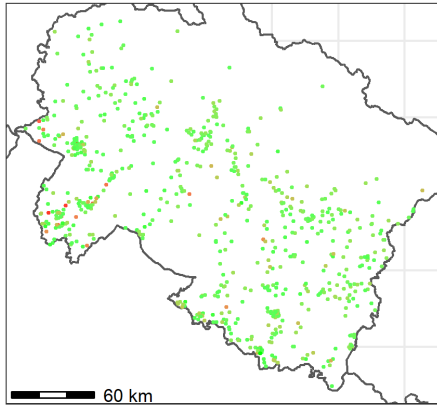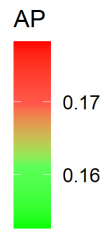

Diarrhoea

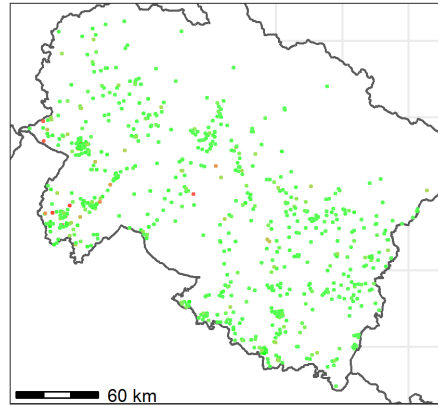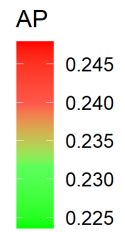

ARI

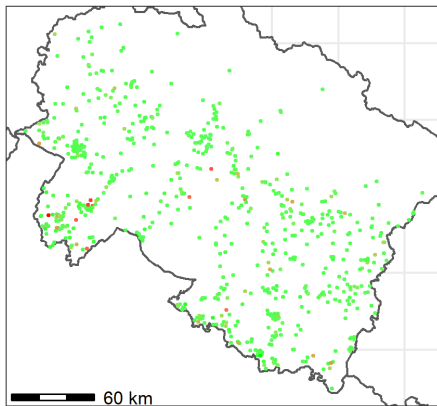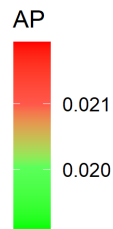

Wasting

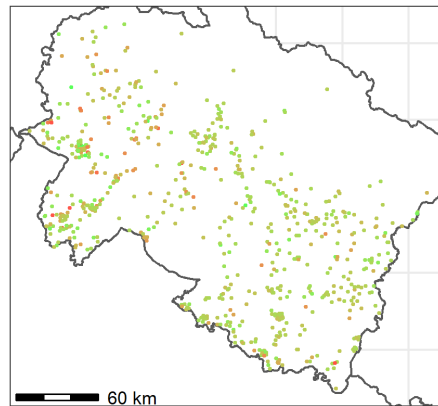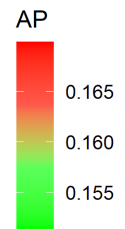

West Bengal

Fever

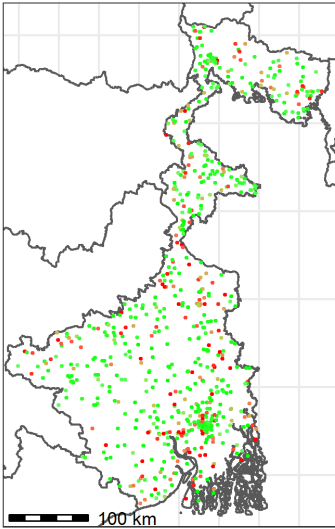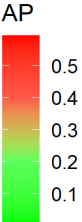

Diarrhoea

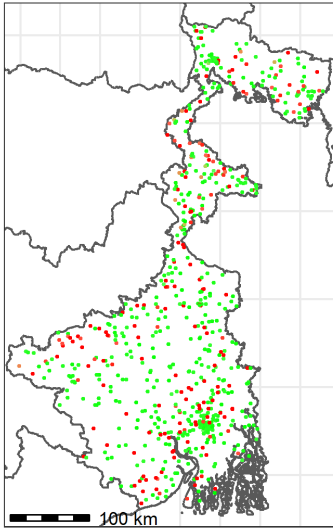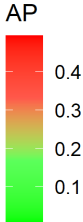

ARI

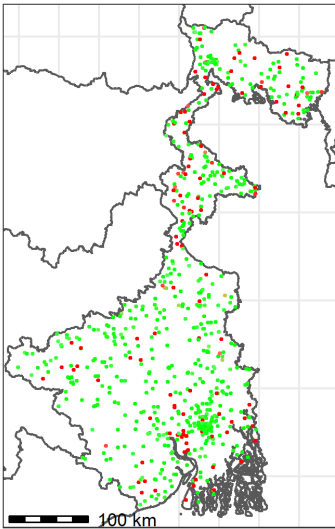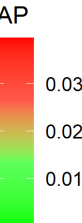

Wasting

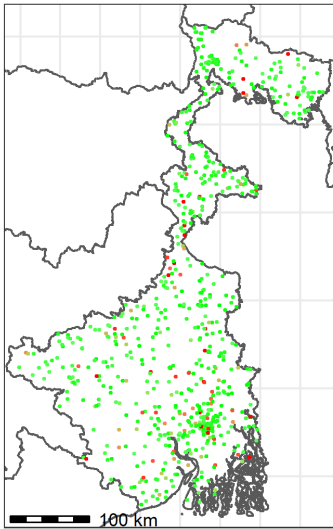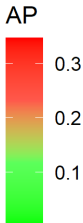

Zambia

Fever

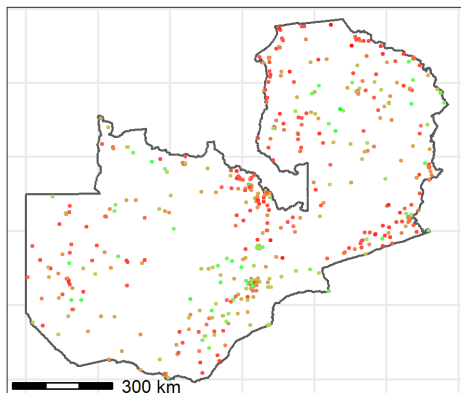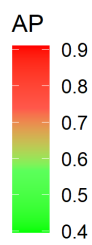

Diarrhoea

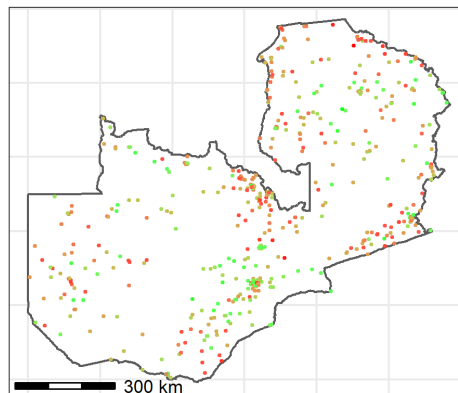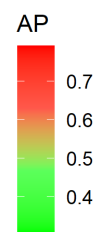

ARI

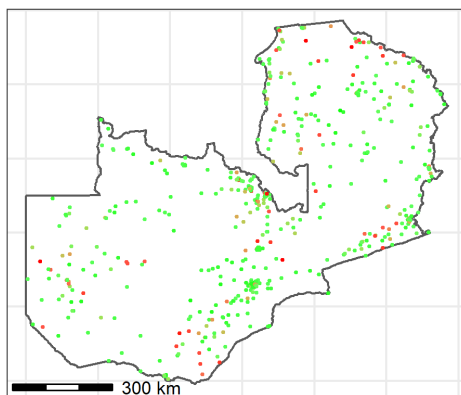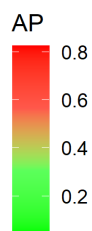

Wasting

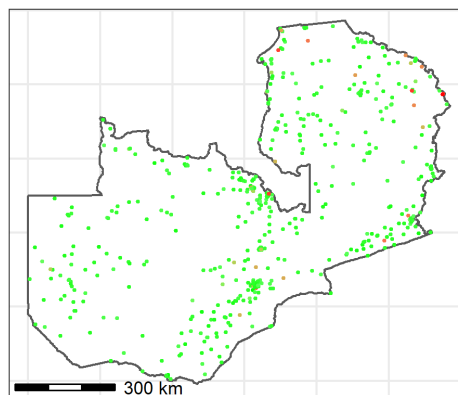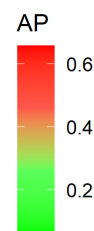

Zimbabwe

Fever

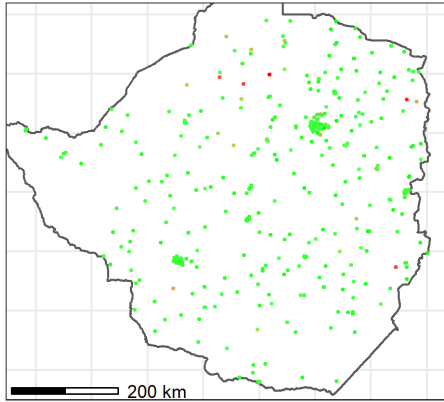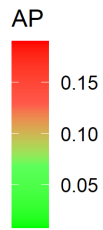

Diarrhoea

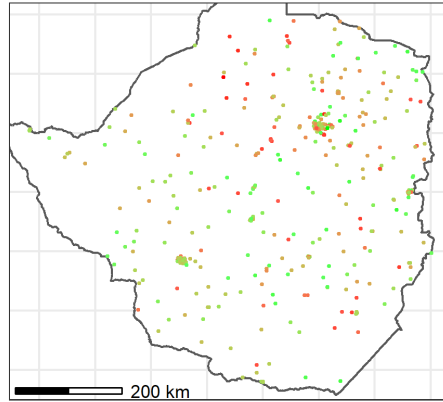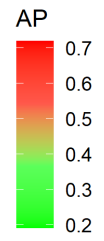

ARI

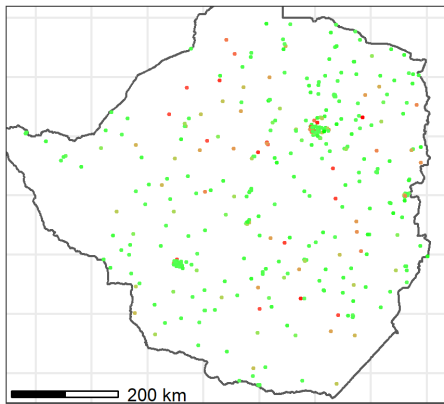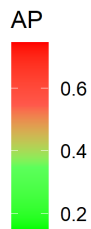

Wasting

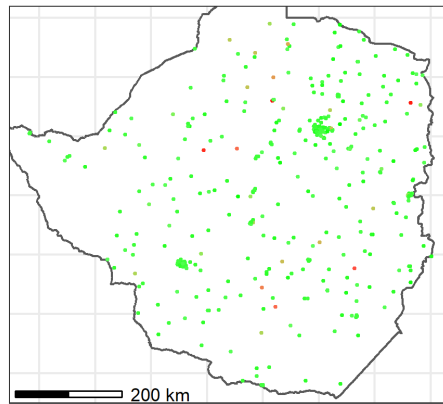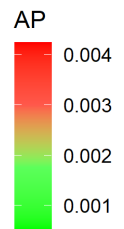



Bihar

Fever

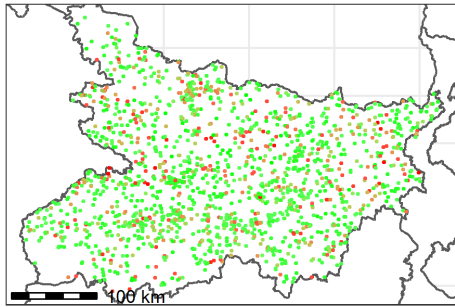

Diarrhoea

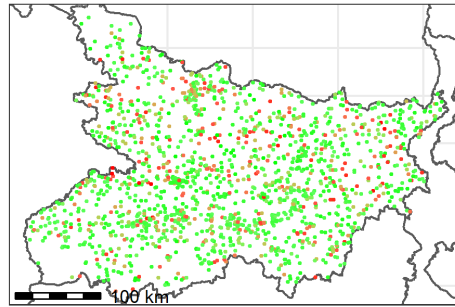

ARI

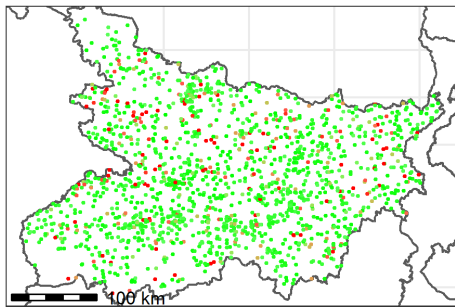

Wasting

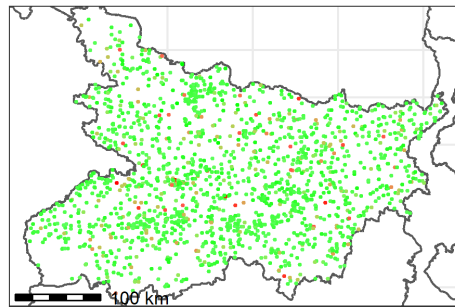

Burkina Faso

Fever

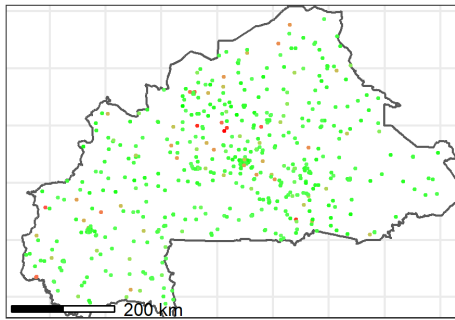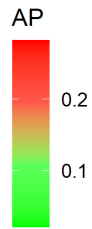

Diarrhoea

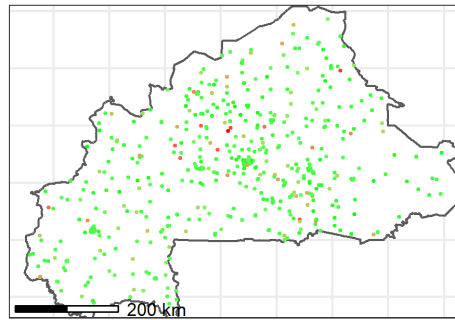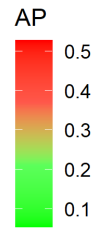

ARI

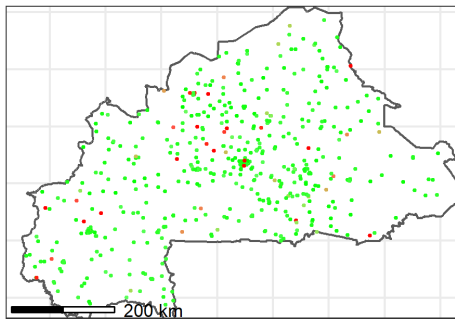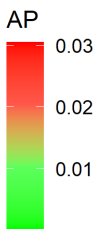

Wasting

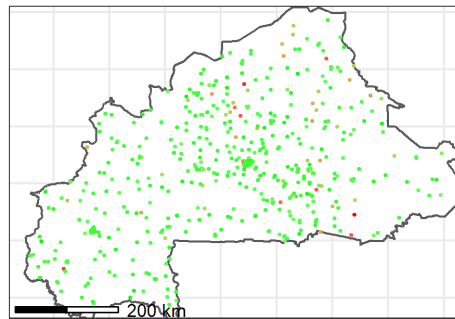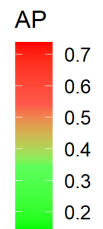

Supplement: MOESM5 [file 19290572]
