# Supplementary material for: Health inequities and clustering of fever, acute respiratory infection, diarrhoea and wasting in children under five in low- and middle-income countries: a Demographic and Health Surveys analysis
Source: Springer Nature journal article supplement (doi:10.1186/s12916-021-02018-0), 2021-06-24

**Health inequities and clustering of fever, acute respiratory infection, diarrhoea and wasting in children under five in low- and middle-income countries: A Demographic and Health Surveys analysis.**

**Supplementary Information: Model fit**

Posterior predictive checks

|                                           | <b>Grouped</b> |               |               |                    |                |
|-------------------------------------------|----------------|---------------|---------------|--------------------|----------------|
|                                           | <b>All</b>     | <b>Wealth</b> | <b>Access</b> | <b>Urban/Rural</b> | <b>Cluster</b> |
| <b>% of checks &lt; 0.05 or &gt; 0.95</b> | 3.4            | 0.8           | 2             | 1.9                | 13.9           |

## AUC

| Country/Region            | ARI  | Diarrhoea | Fever | Wasted | Country/Region | ARI  | Diarrhoea | Fever | Wasted |
|---------------------------|------|-----------|-------|--------|----------------|------|-----------|-------|--------|
| Andaman & Nicobar Islands | 0.67 | 0.61      | 0.70  | 0.74   | Liberia        | 0.77 | 0.73      | 0.71  | 0.80   |
| Andhra Pradesh            | 1.00 | 0.95      | 0.93  | 0.85   | Madhya Pradesh | 0.86 | 0.80      | 0.80  | 0.62   |
| Angola                    | 0.86 | 0.80      | 0.80  | 0.79   | Maharashtra    | 0.96 | 0.87      | 0.86  | 0.79   |
| Arunachal Pradesh         | 0.70 | 0.65      | 0.61  | 0.63   | Malawi         | 0.82 | 0.77      | 0.77  | 0.86   |
| Assam                     | 0.76 | 0.88      | 0.81  | 0.71   | Mali           | 0.85 | 0.77      | 0.74  | 0.76   |
| Bangladesh                | 0.76 | 0.78      | 0.68  | 0.65   | Manipur        | 0.68 | 0.65      | 0.66  | 0.61   |
| Benin                     | 0.87 | 0.79      | 0.73  | 0.78   | Meghalaya      | 0.71 | 0.63      | 0.64  | 0.65   |
| Bihar                     | 0.92 | 0.86      | 0.83  | 0.71   | Mizoram        | 0.72 | 0.69      | 0.70  | 0.64   |
| Burkina Faso              | 0.92 | 0.78      | 0.76  | 0.81   | Mozambique     | 0.84 | 0.76      | 0.74  | 0.83   |
| Burundi                   | 0.81 | 0.75      | 0.73  | 0.80   | Myanmar        | 0.76 | 0.77      | 0.72  | 0.76   |
| Cambodia                  | 0.86 | 0.80      | 0.75  | 0.74   | Nagaland       | 0.77 | 0.73      | 0.72  | 0.62   |
| Cameroon                  | 0.93 | 0.80      | 0.74  | 0.86   | Namibia        | 0.92 | 0.83      | 0.81  | 0.90   |
| Chad                      | 0.84 | 0.77      | 0.77  | 0.73   | NCT of Delhi   | 0.98 | 0.89      | 0.89  | 0.89   |
| Chandigarh                | 0.94 | NA        | 0.95  | 0.96   | Nepal          | 0.82 | 0.75      | 0.75  | 0.79   |
| Chhattisgarh              | 0.77 | 0.75      | 0.76  | 0.67   | Nigeria        | 0.87 | 0.81      | 0.77  | 0.80   |
| Comoros                   | 0.94 | 0.83      | 0.78  | 0.70   | Odisha         | 0.91 | 0.79      | 0.79  | 0.64   |
| Congo Democratic Republic | 0.75 | 0.77      | 0.76  | 0.77   | Pakistan       | 0.76 | 0.76      | 0.72  | 0.80   |
| Cote d'Ivoire             | 0.89 | 0.75      | 0.70  | 0.82   | Puducherry     | 0.75 | 0.68      | 0.67  | 0.57   |
| Dadra & Nagar Haveli      | 0.85 | 0.97      | 0.84  | 0.67   | Punjab         | 0.85 | 0.83      | 0.78  | 0.80   |
| Daman & Diu               | 0.88 | 0.79      | 0.81  | 0.72   | Rajasthan      | 0.87 | 0.82      | 0.80  | 0.74   |
| Egypt                     | 0.80 | 0.79      | 0.77  | 0.90   | Rwanda         | 0.85 | 0.80      | 0.80  | 0.87   |
| Ethiopia                  | 0.81 | 0.73      | 0.72  | 0.74   | Senegal        | 0.80 | 0.75      | 0.75  | 0.68   |
| Gabon                     | 0.70 | 0.72      | 0.66  | 0.70   | Sierra Leone   | 0.87 | 0.83      | 0.77  | 0.80   |
| Ghana                     | 0.88 | 0.83      | 0.84  | 0.87   | Sikkim         | 0.82 | 0.86      | 0.81  | 0.66   |
| Goa                       | 0.91 | 0.93      | 0.87  | 0.72   | South Africa   | 0.99 | 0.93      | 0.85  | 0.95   |
| Guinea                    | 0.91 | 0.79      | 0.74  | 0.83   | Tamil Nadu     | 0.95 | 0.90      | 0.87  | 0.81   |
| Gujarat                   | 0.95 | 0.87      | 0.88  | 0.80   | Tanzania       | 0.80 | 0.79      | 0.75  | 0.70   |
| Haiti                     | 0.78 | 0.76      | 0.72  | 0.78   | Telangana      | 0.99 | 0.93      | 0.87  | 0.87   |
| Haryana                   | 0.82 | 0.78      | 0.80  | 0.74   | Timor-Leste    | 0.86 | 0.82      | 0.80  | 0.70   |
| Himachal Pradesh          | 0.72 | 0.73      | 0.66  | 0.59   | Togo           | 0.90 | 0.78      | 0.72  | 0.78   |
| Jammu & Kashmir           | 0.65 | 0.65      | 0.62  | 0.61   | Tripura        | 0.90 | 0.81      | 0.74  | 0.70   |
| Jharkhand                 | 0.84 | 0.79      | 0.79  | 0.64   | Uganda         | 0.82 | 0.81      | 0.83  | 0.82   |
| Karnataka                 | 0.97 | 0.91      | 0.90  | 0.79   | Uttar Pradesh  | 0.87 | 0.80      | 0.78  | 0.78   |
| Kenya                     | 0.73 | 0.76      | 0.74  | 0.79   | Uttarakhand    | 0.69 | 0.64      | 0.66  | 0.70   |
| Kerala                    | 0.99 | 0.97      | 0.91  | 0.89   | West Bengal    | 0.95 | 0.91      | 0.87  | 0.83   |
| Lakshadweep               | 0.67 | 0.84      | 0.77  | 0.63   | Zambia         | 0.85 | 0.74      | 0.72  | 0.79   |
| Lesotho                   | 0.91 | 0.86      | 0.85  | 0.93   | Zimbabwe       | 0.83 | 0.74      | 0.76  | 0.83   |

Posterior predictive spatial checks

Andaman & Nicobar Islands

Fever

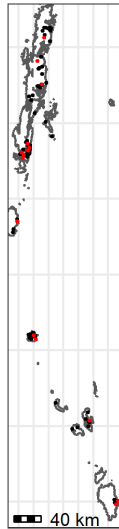

Diarrhoea

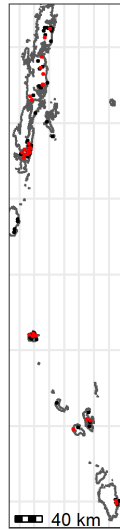

ARI

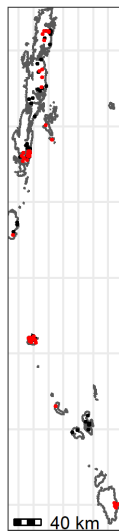

Wasting

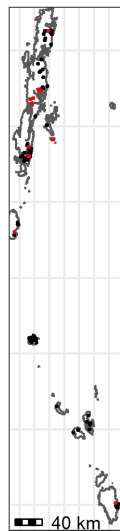

Burundi

Fever

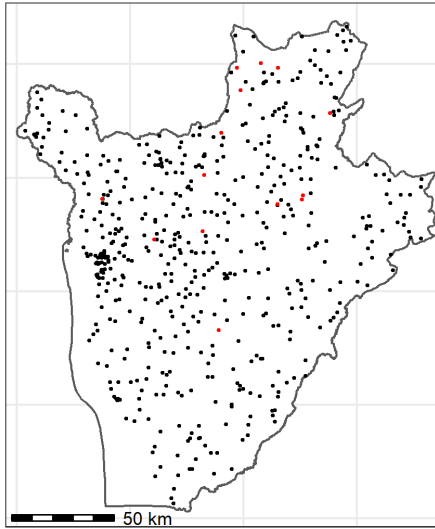

Diarrhoea

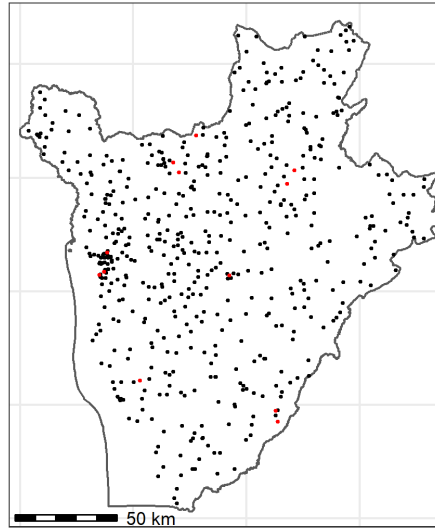

ARI

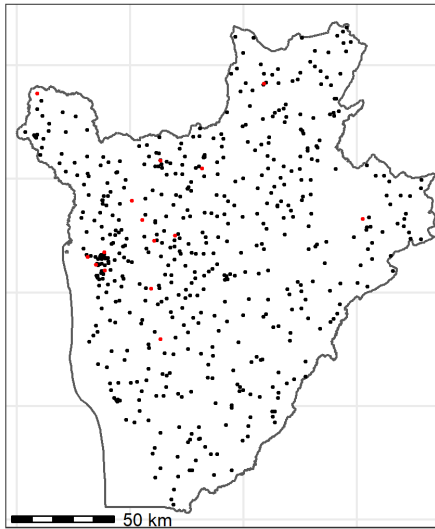

Wasting

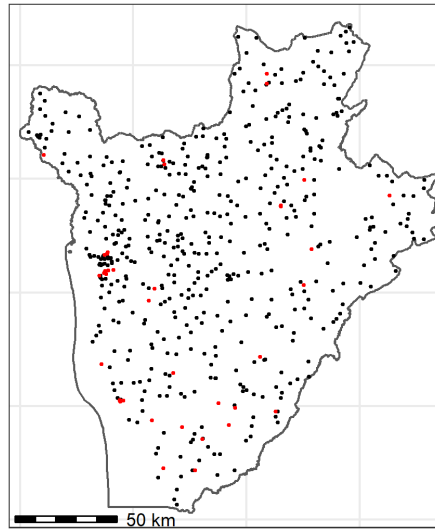

Cambodia

Fever

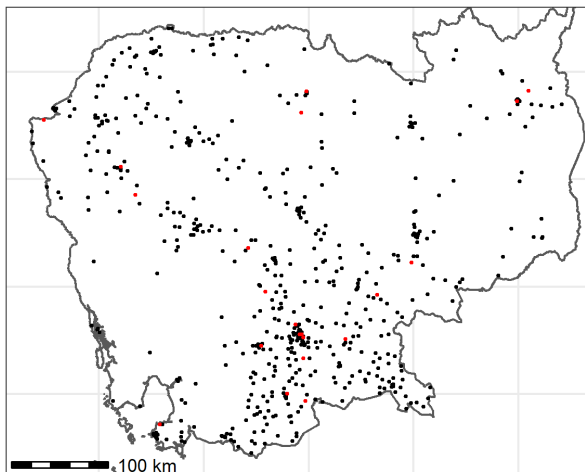

Diarrhoea

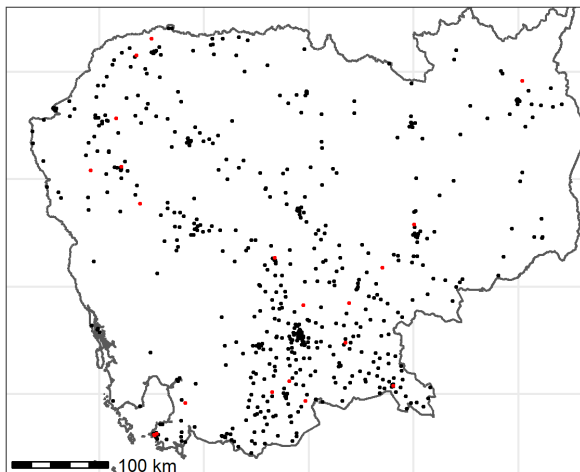

ARI

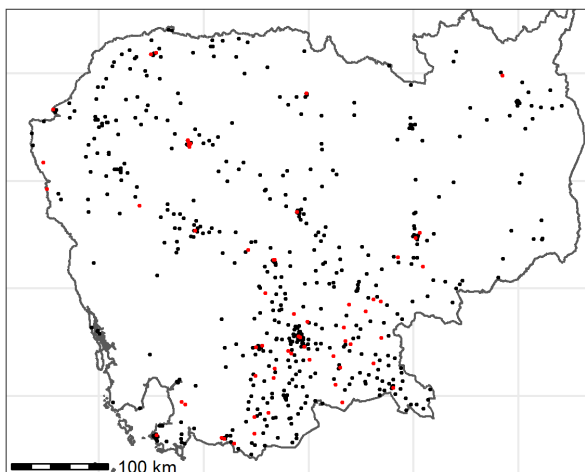

Wasting

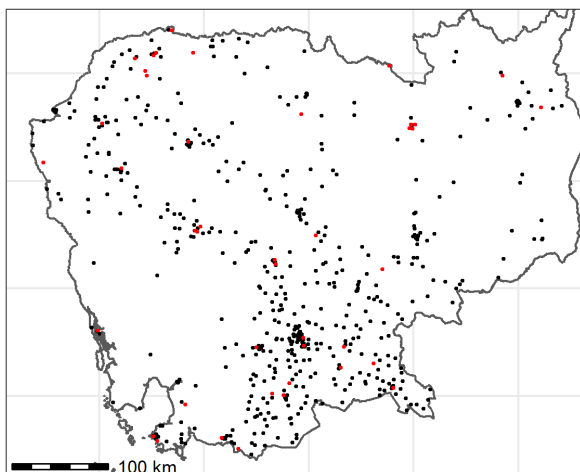

Cameroon

Fever

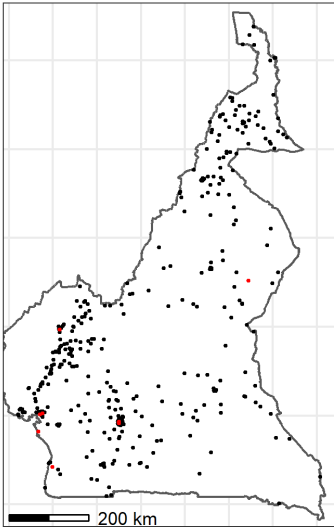

Diarrhoea

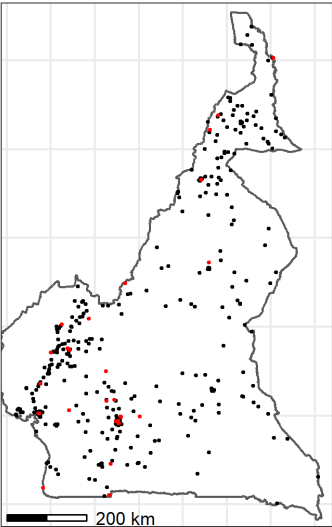

ARI

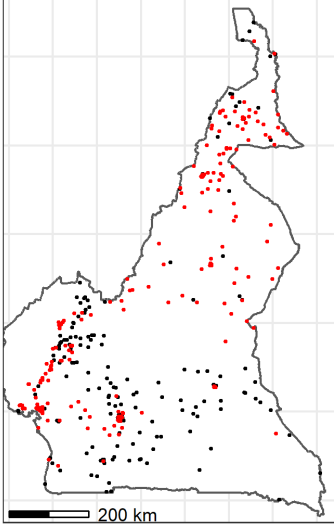

Wasting

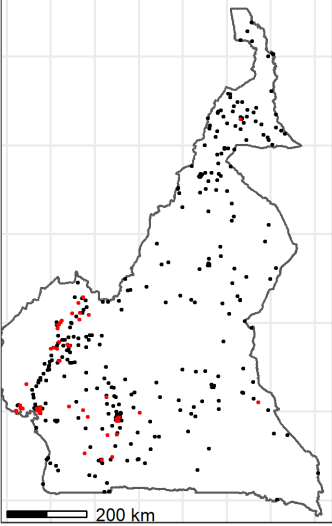

Chad

Fever

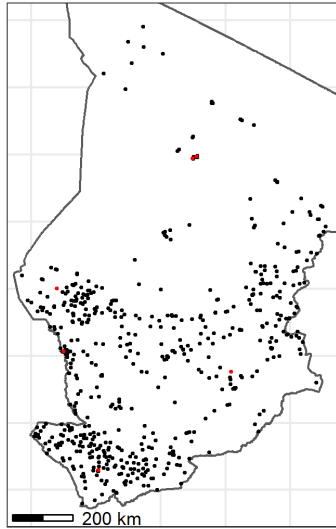

Diarrhoea

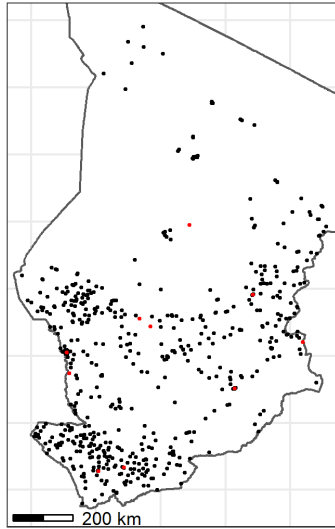

ARI

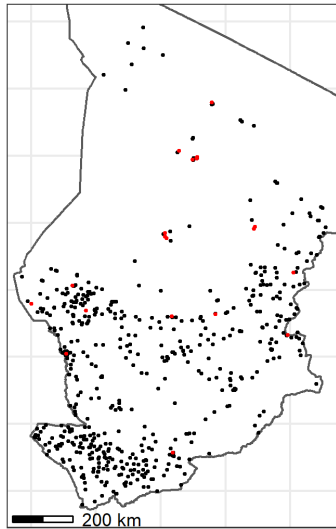

Wasting

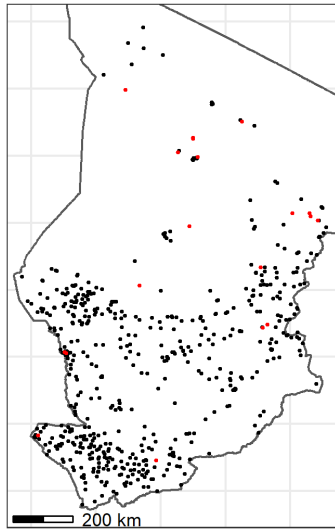

Chandigarh

Fever

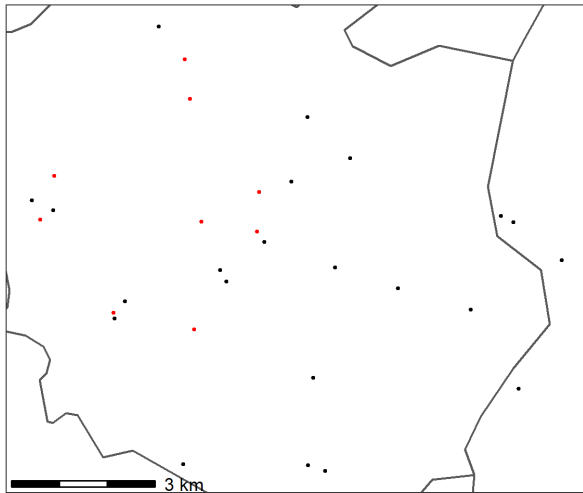

Diarrhoea

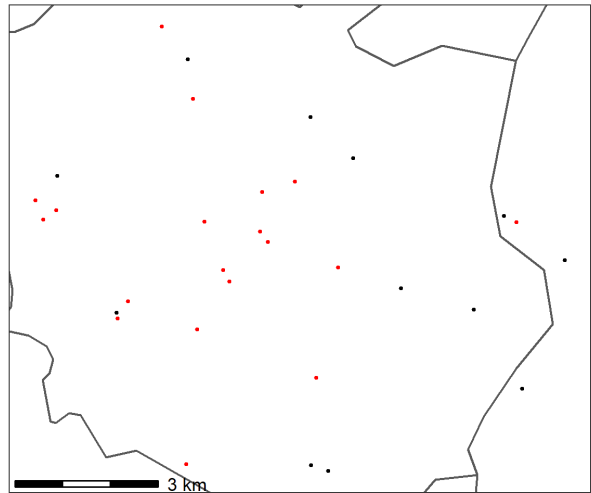

ARI

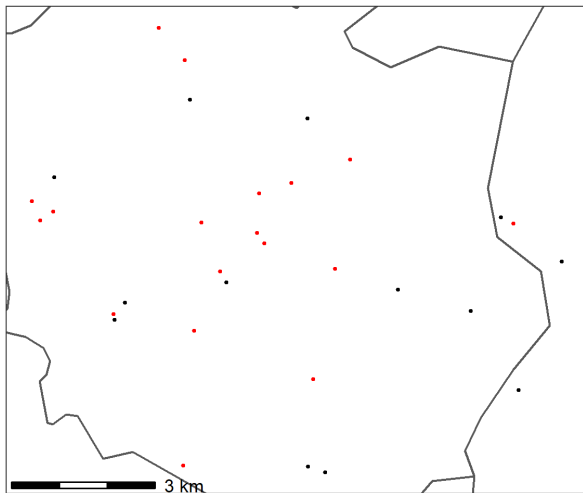

Wasting

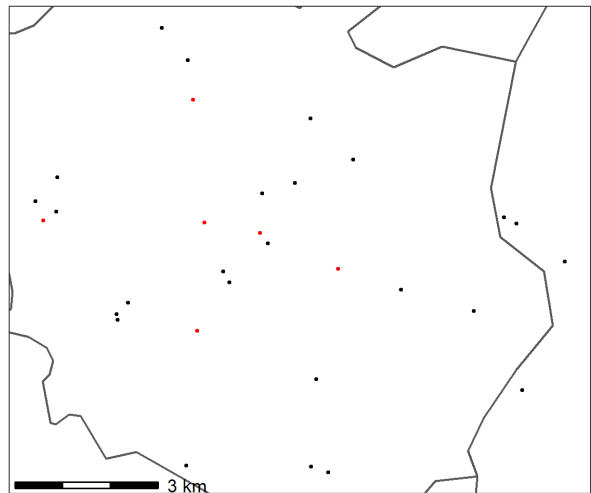



Chhattisgarh

Fever

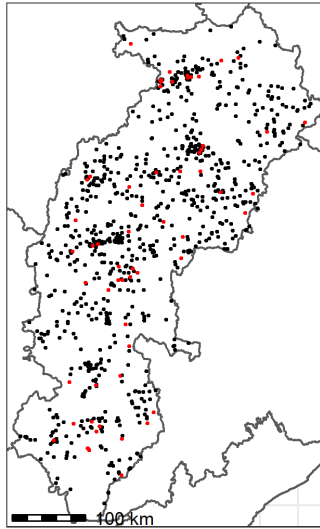

Diarrhoea

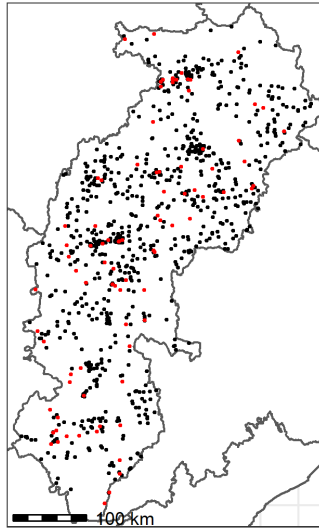

ARI

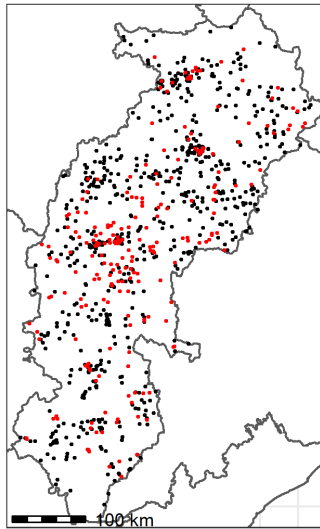

Wasting

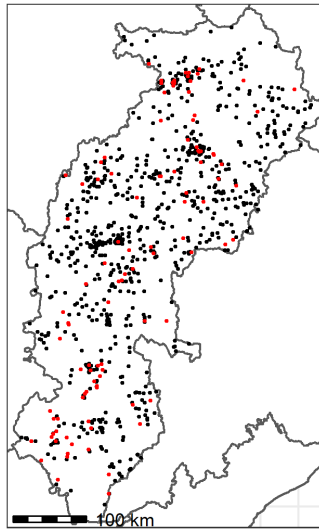

Comoros

Fever

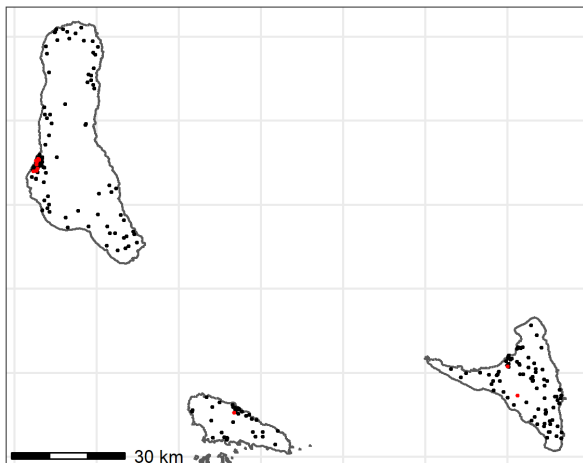

Diarrhoea

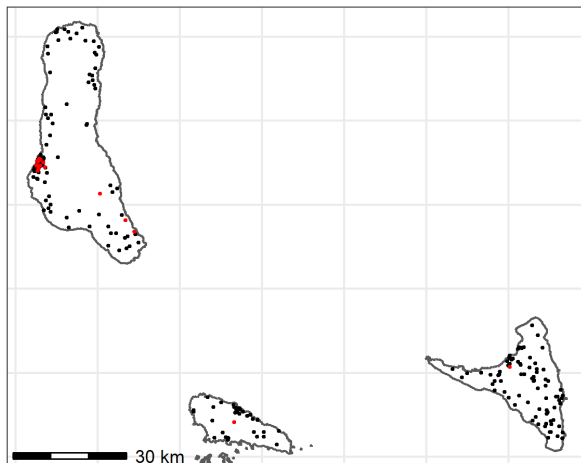

ARI

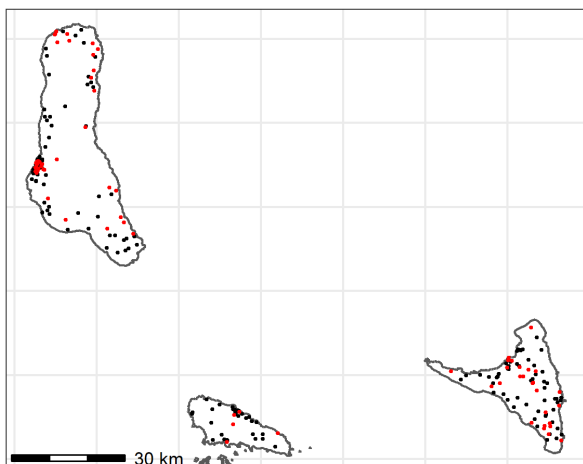

Wasting

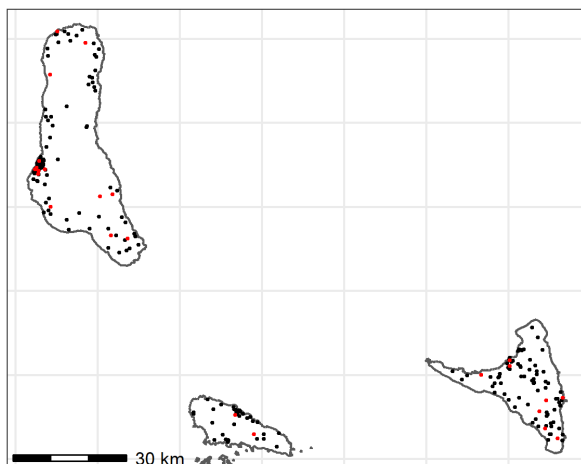

Congo Democratic Republic

Fever

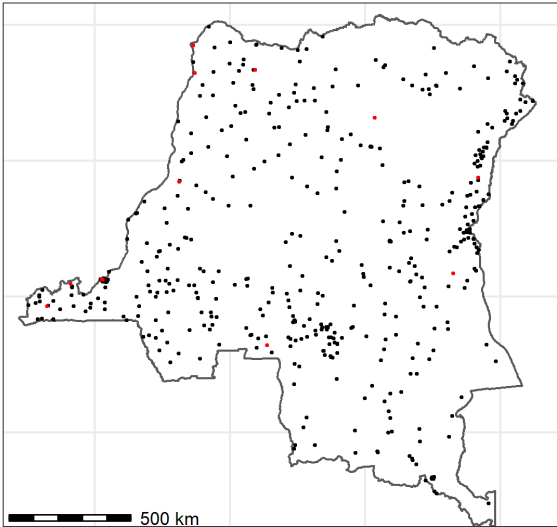

Diarrhoea

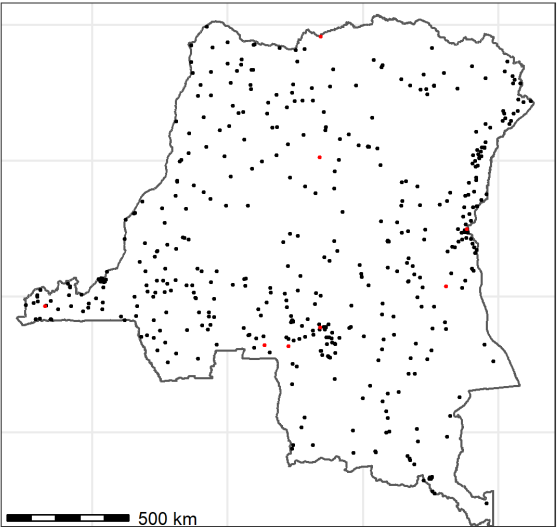

ARI

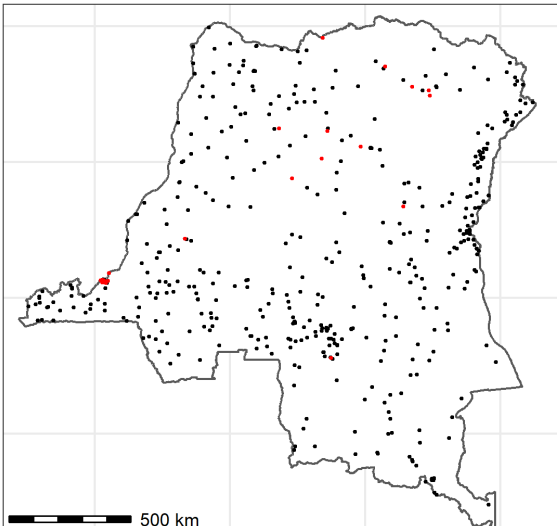

Wasting

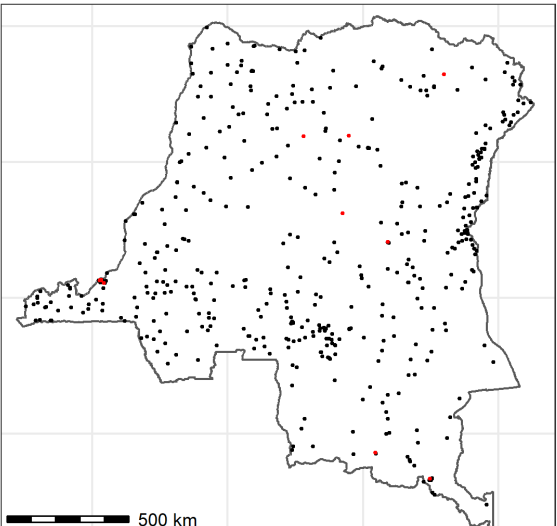

Cote d'Ivoire

Fever

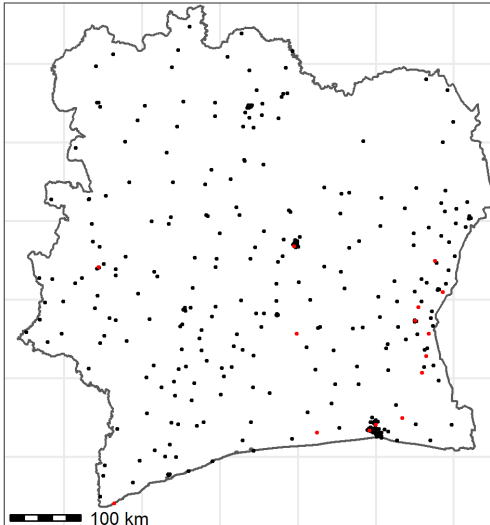

Diarrhoea

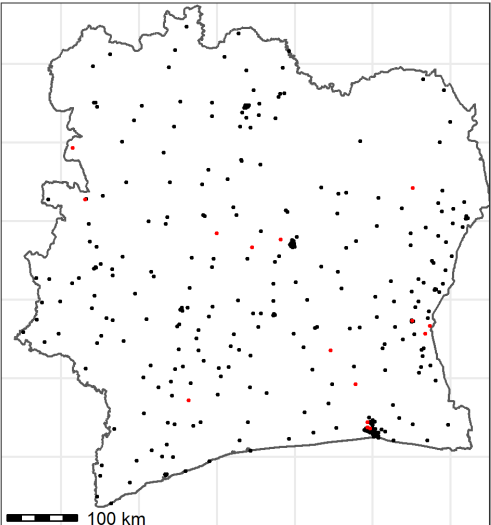

ARI

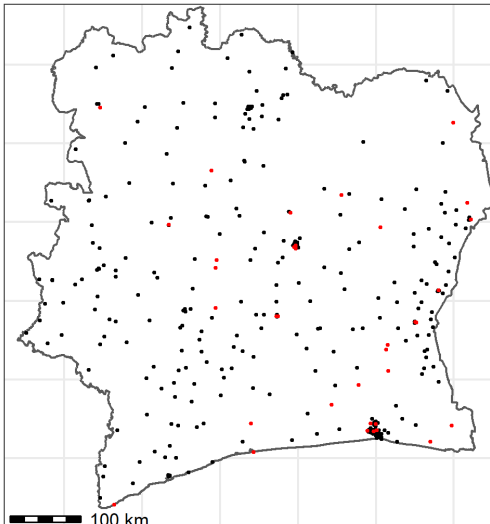

Wasting

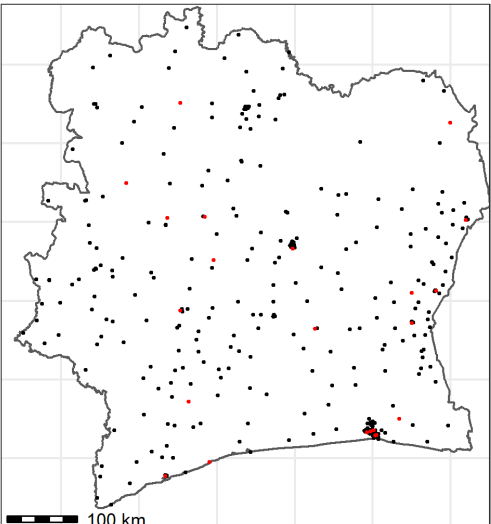

Dadra & Nagar Haveli

Fever

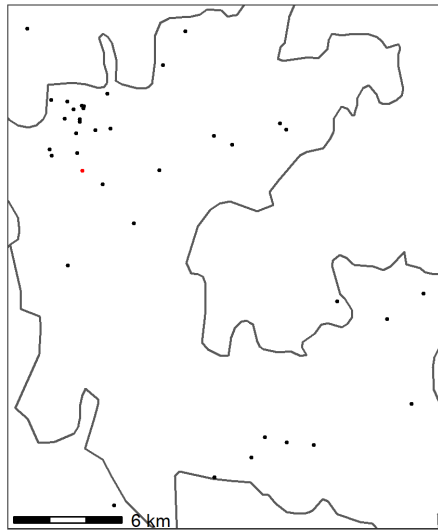

Diarrhoea

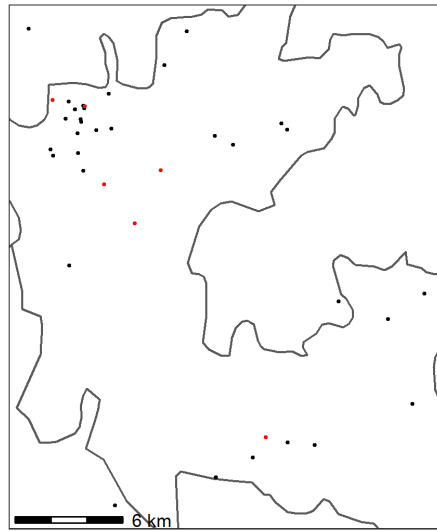

ARI

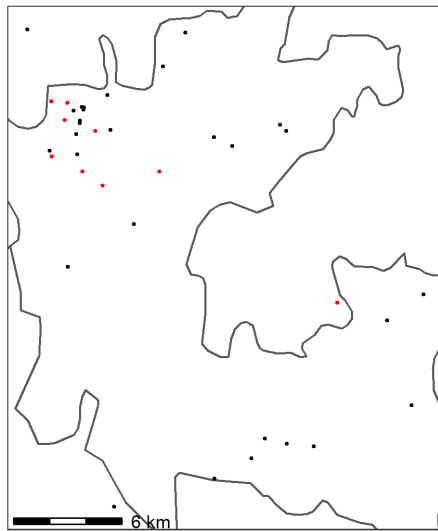

Wasting

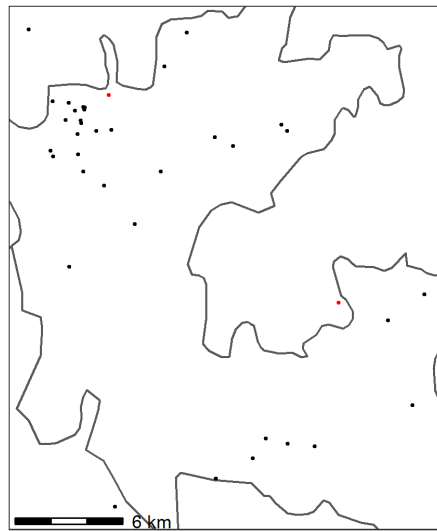

Andhra Pradesh

Fever

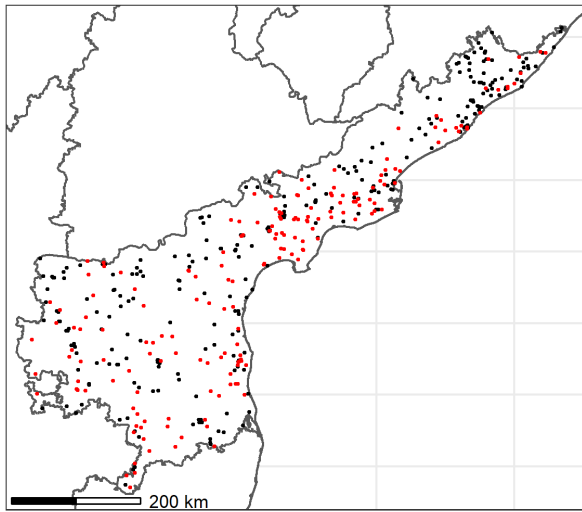

Diarrhoea

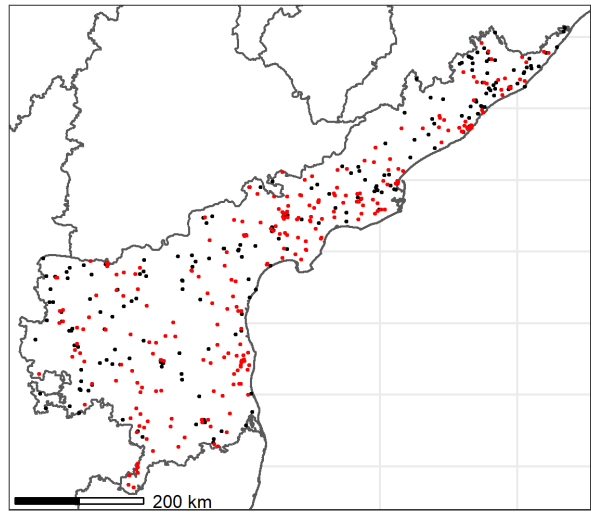

ARI

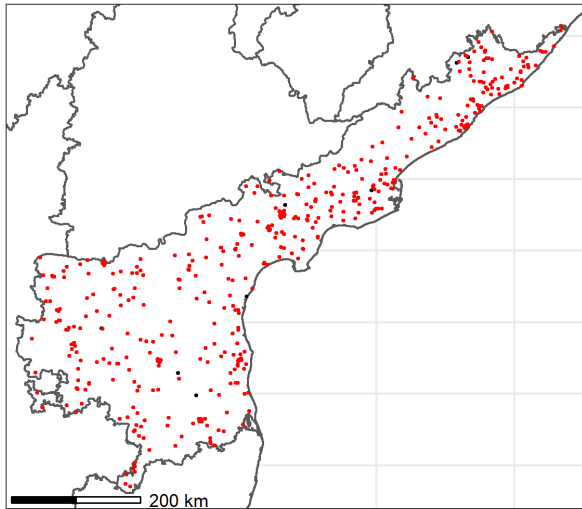

Wasting

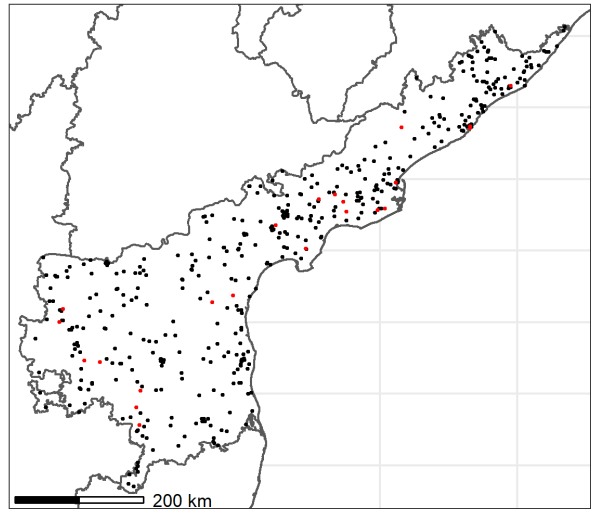

Daman & Diu

Fever

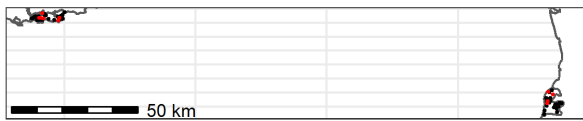

Diarrhoea

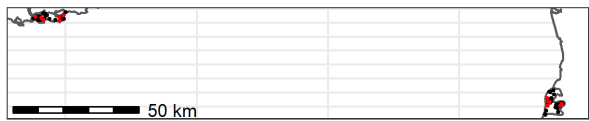

ARI

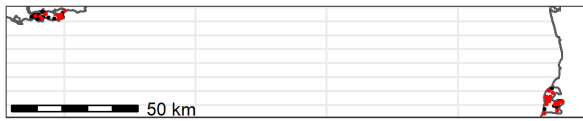

Wasting

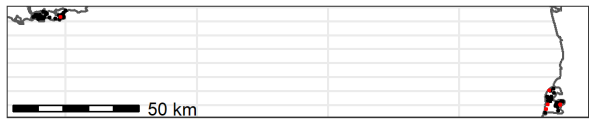

Egypt

Fever

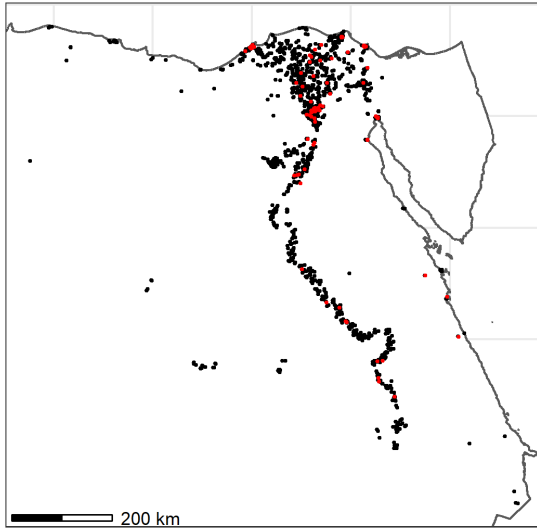

Diarrhoea

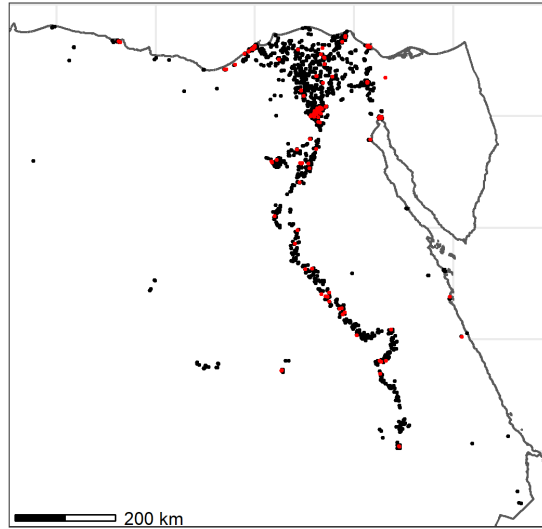

ARI

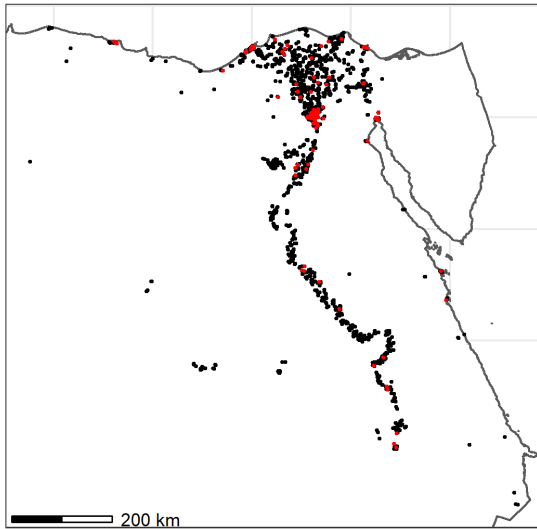

Wasting

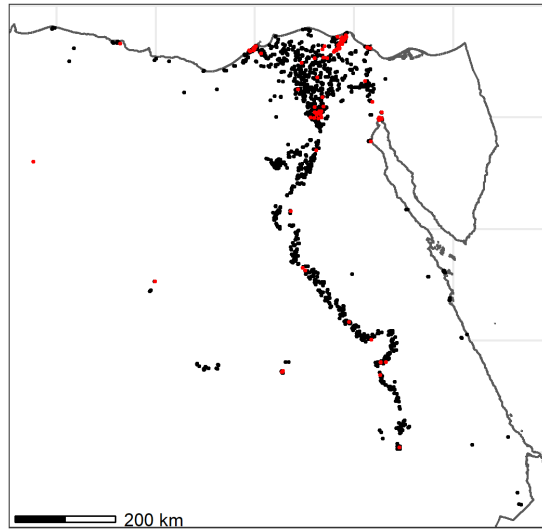



Ethiopia

Fever

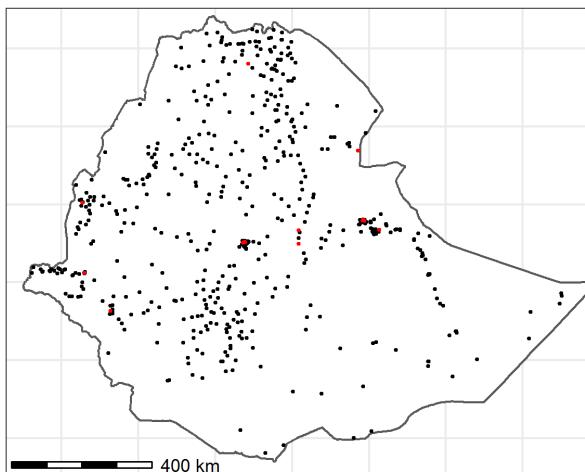

Diarrhoea

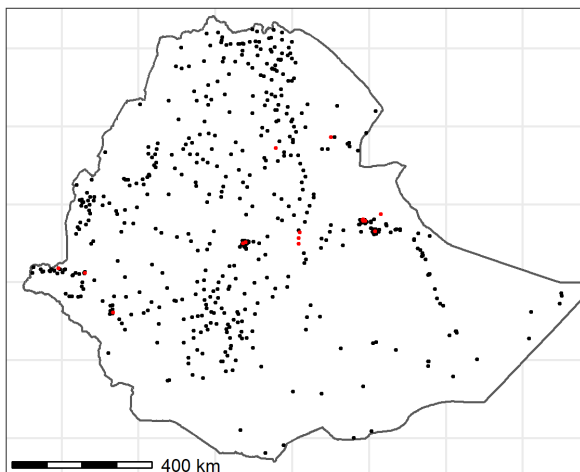

ARI

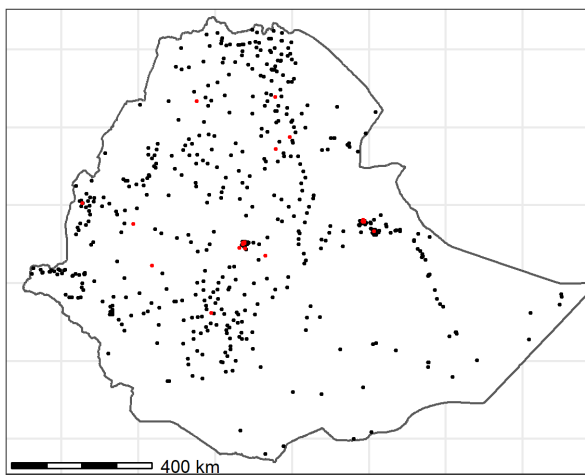

Wasting

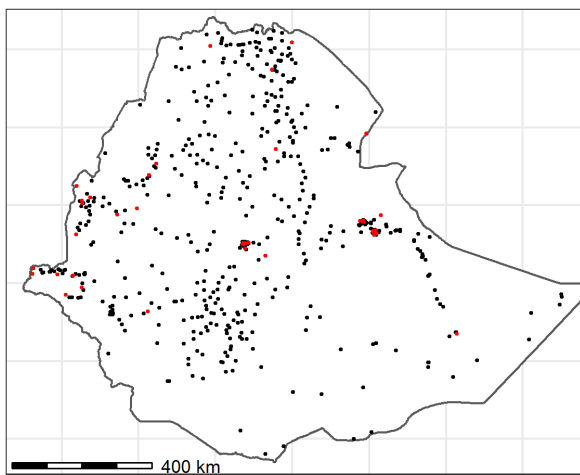

Gabon

Fever

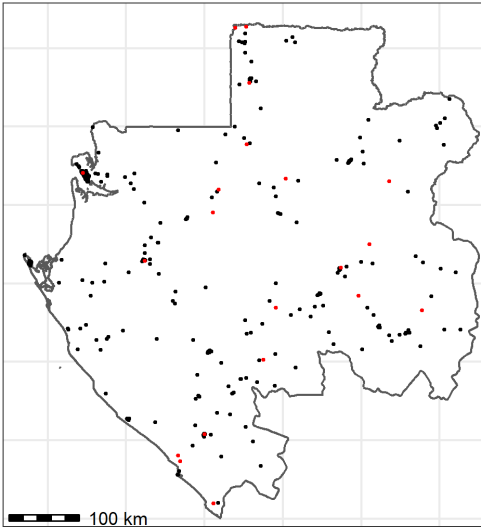

Diarrhoea

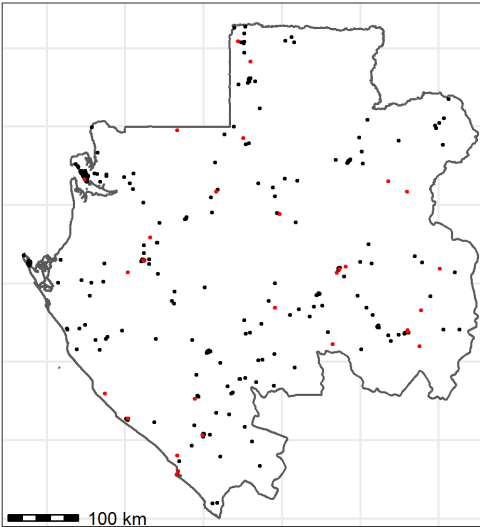

ARI

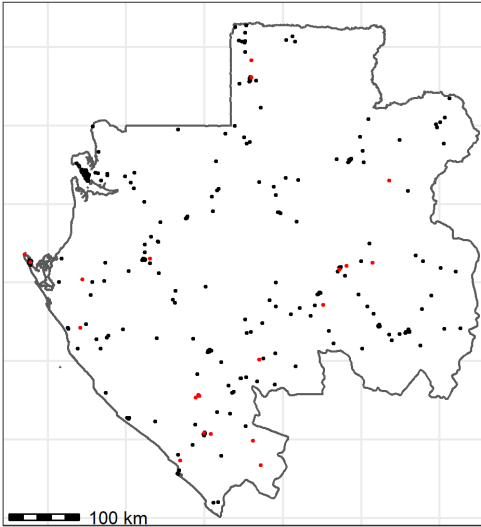

Wasting

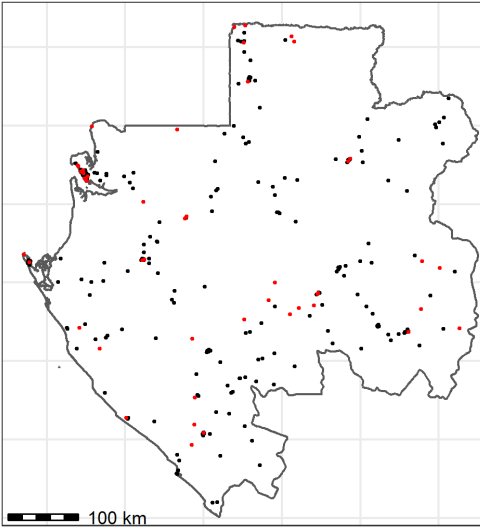

Ghana

Fever

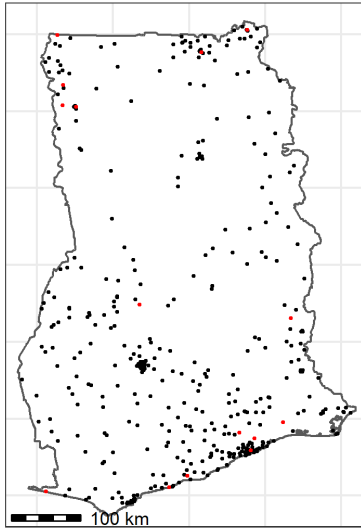

Diarrhoea

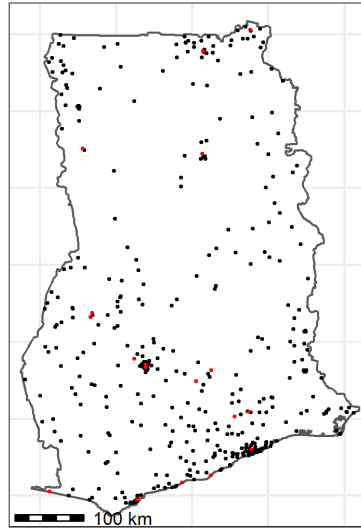

ARI

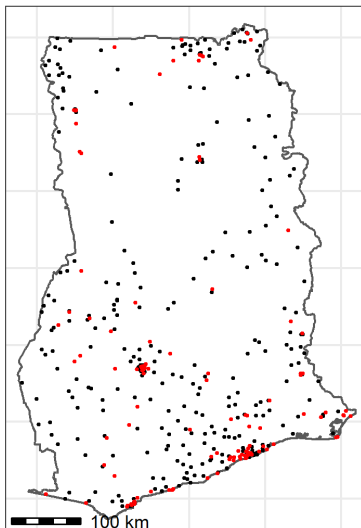

Wasting

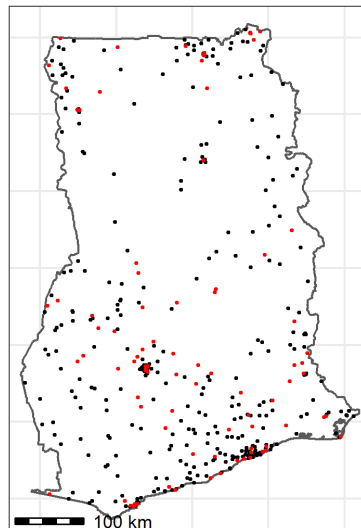

Goa

Fever

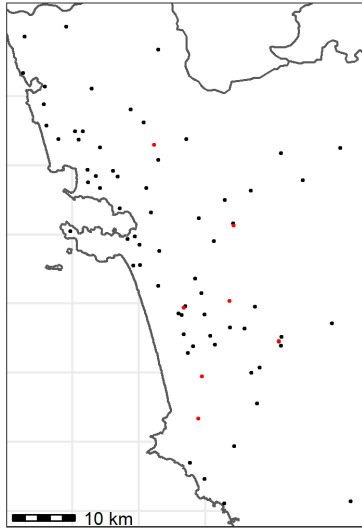

Diarrhoea

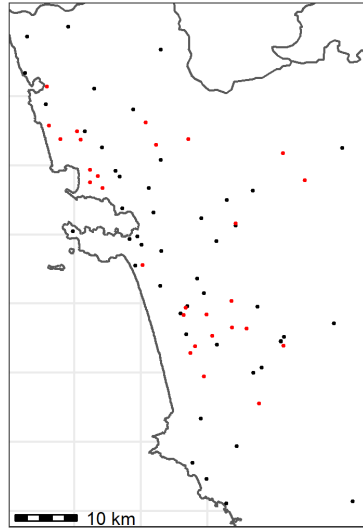

ARI

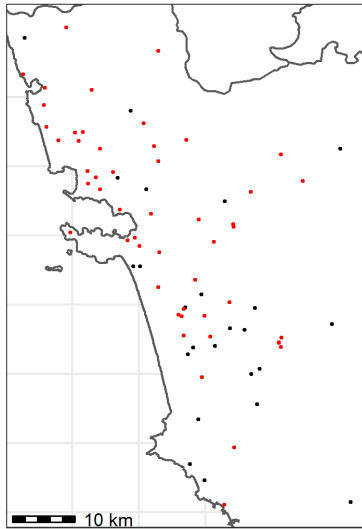

Wasting

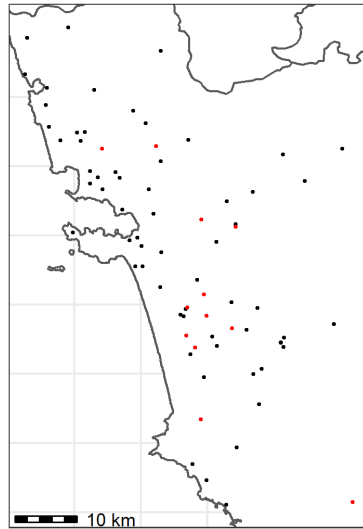

Guinea

Fever

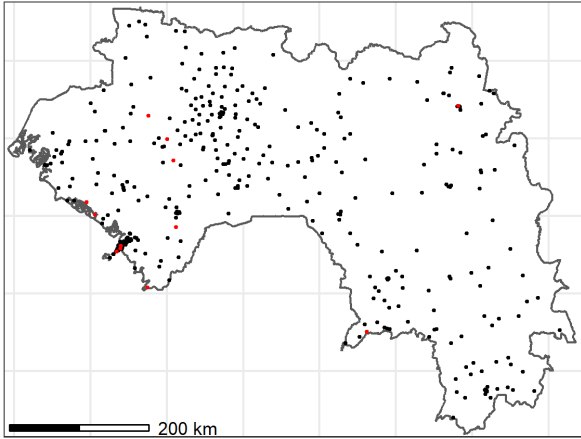

Diarrhoea

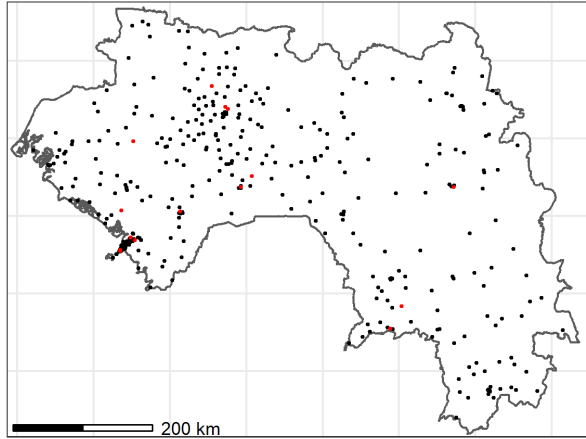

ARI

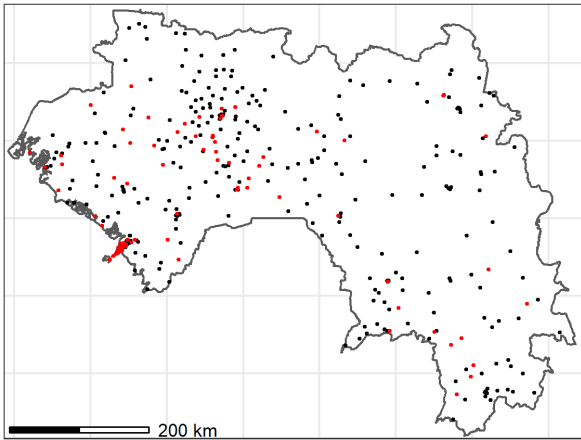

Wasting

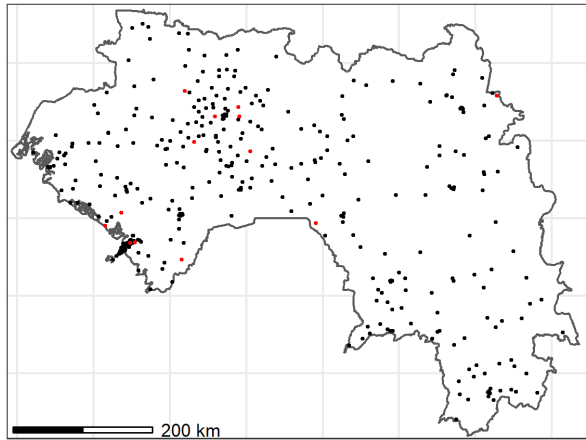

Gujarat

Fever

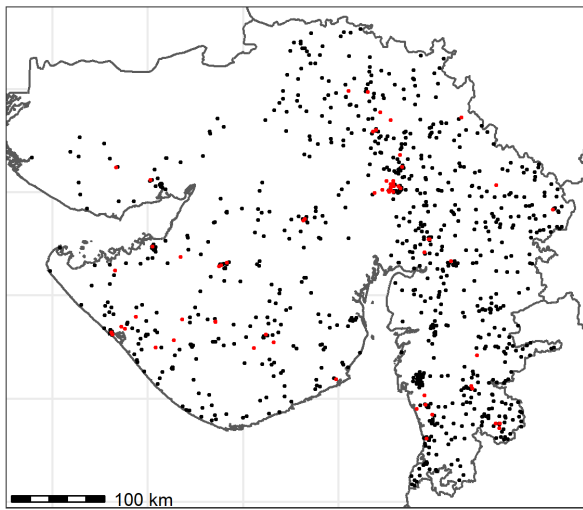

Diarrhoea

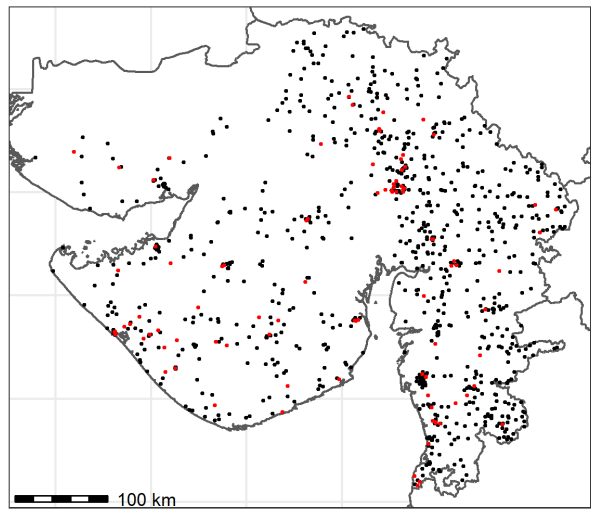

ARI

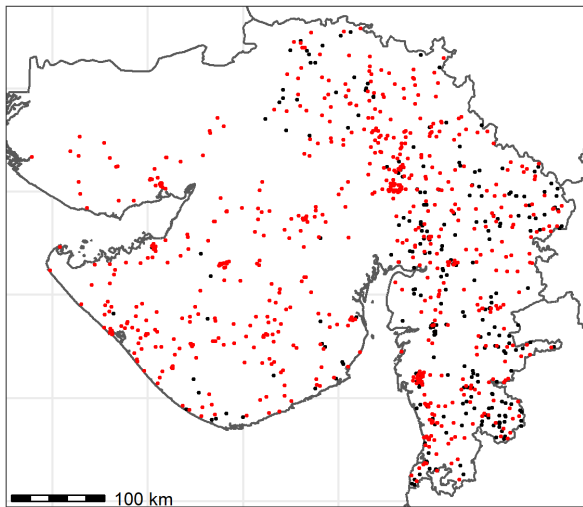

Wasting

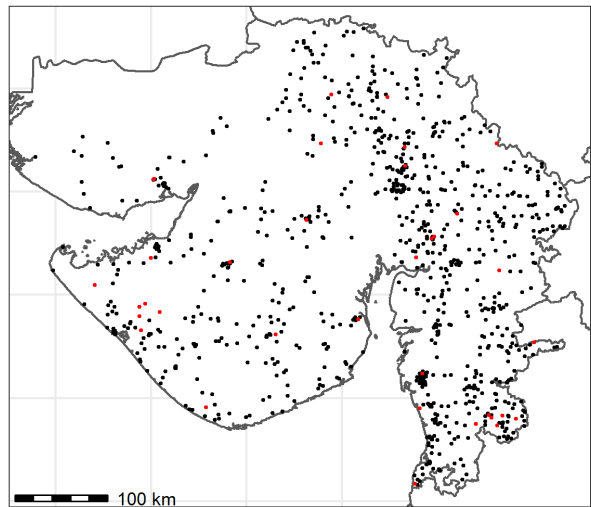

Haiti

Fever

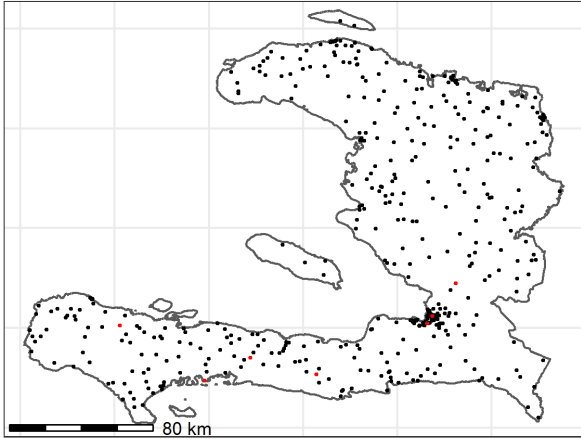

Diarrhoea

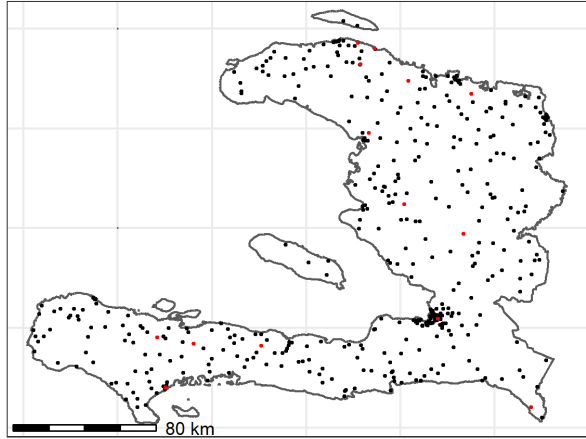

ARI

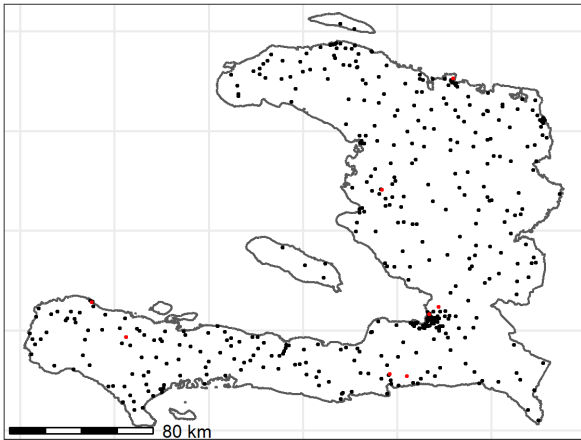

Wasting

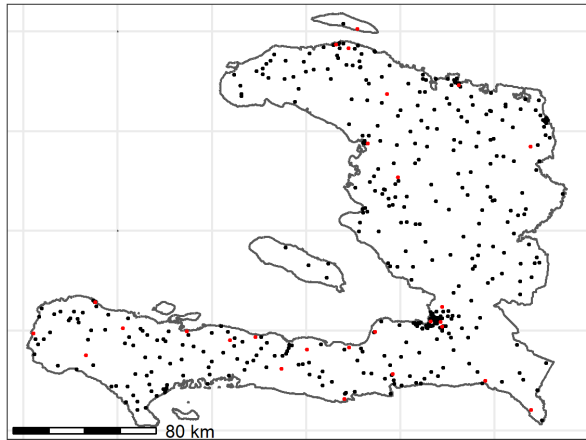

Haryana

Fever

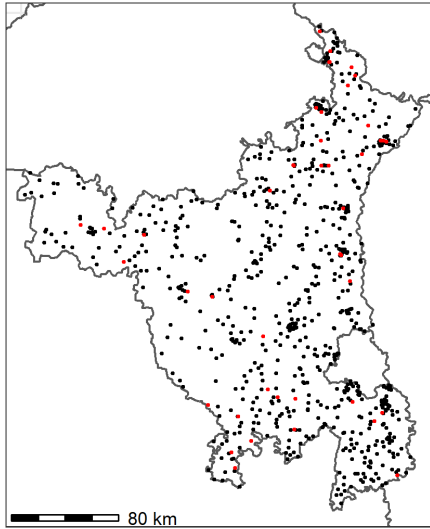

Diarrhoea

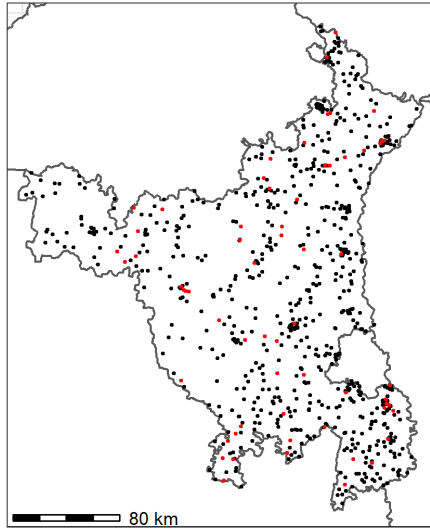

ARI

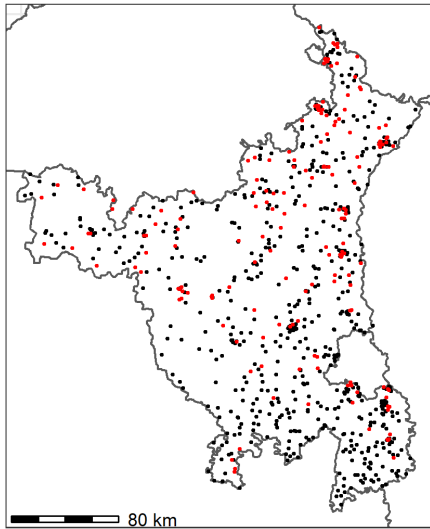

Wasting

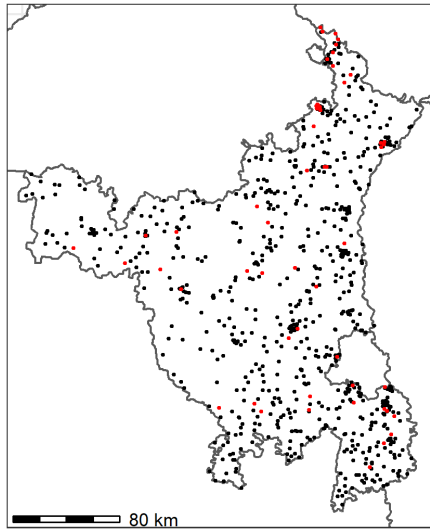



Angola

Fever

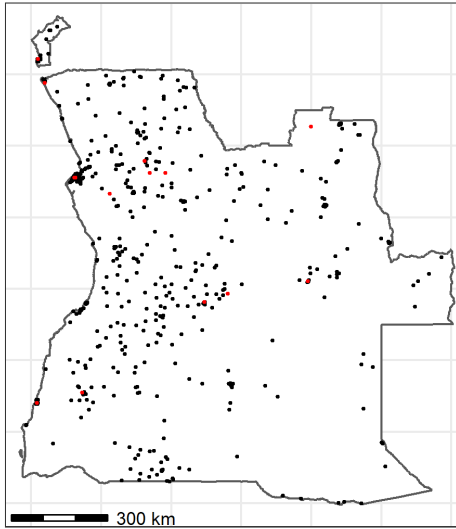

Diarrhoea

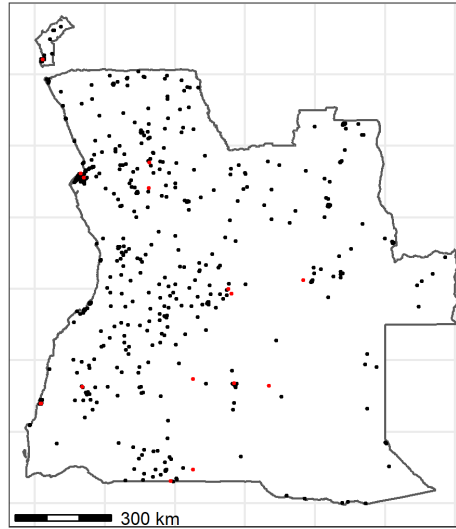

ARI

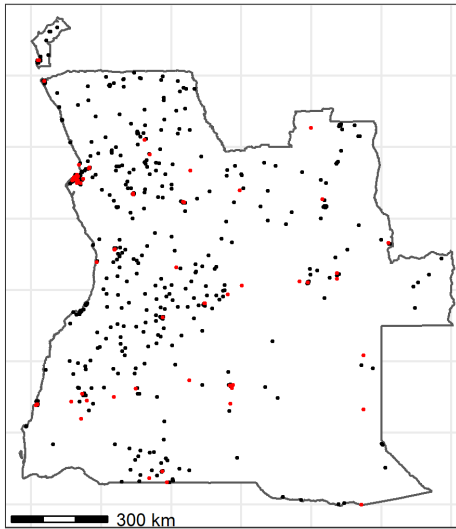

Wasting

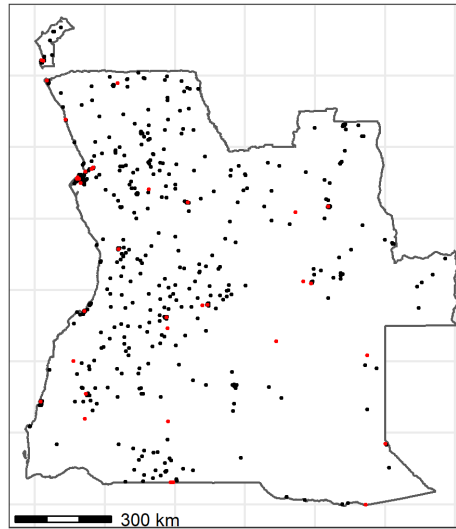

Himachal Pradesh

Fever

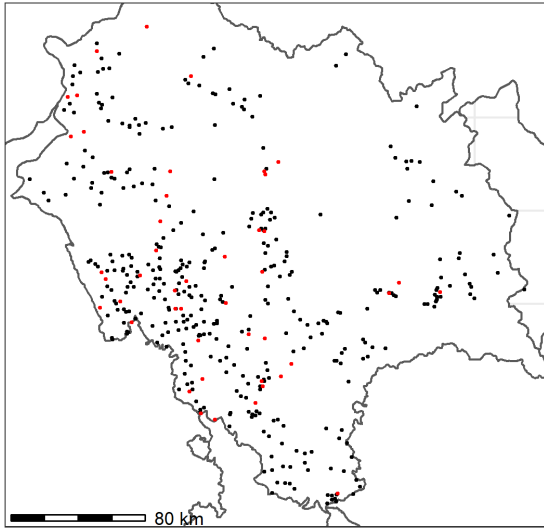

Diarrhoea

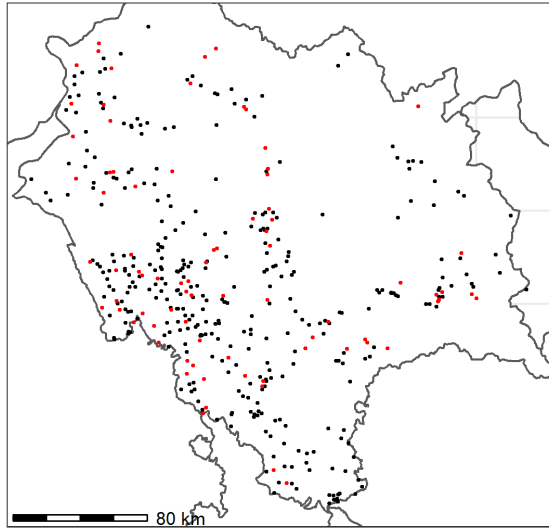

ARI

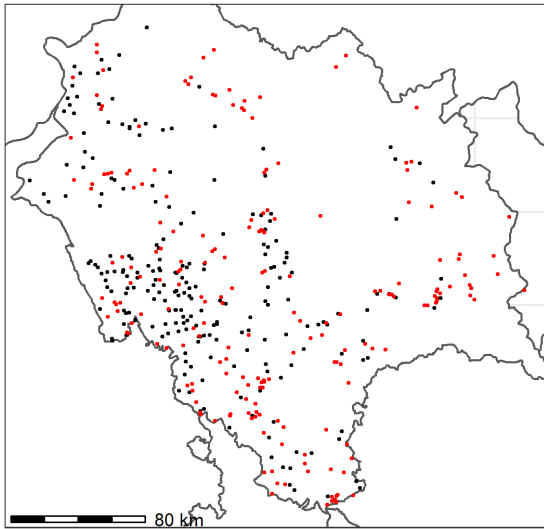

Wasting

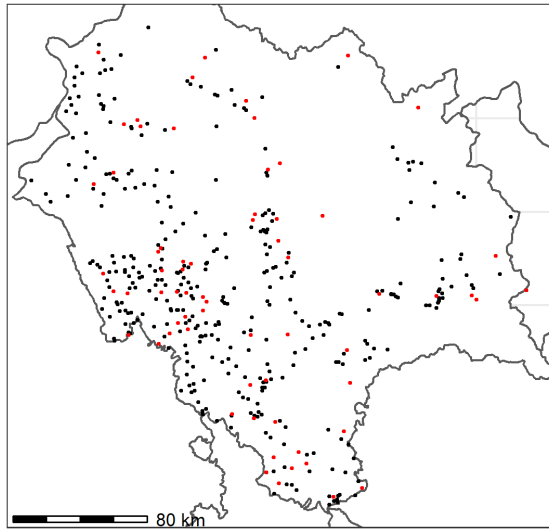

Jammu & Kashmir

Fever

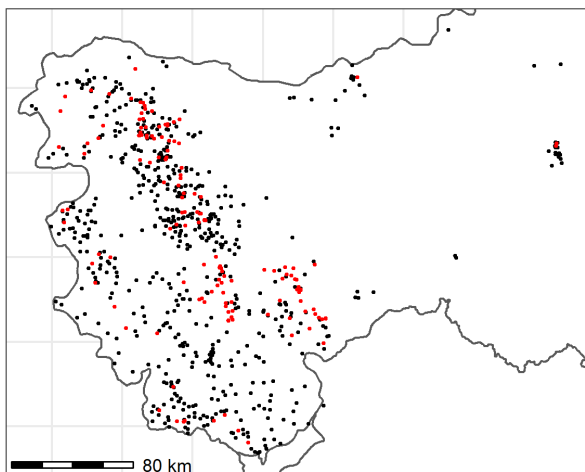

Diarrhoea

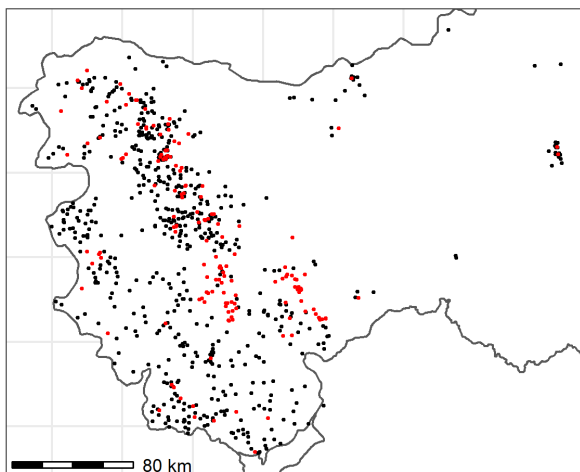

ARI

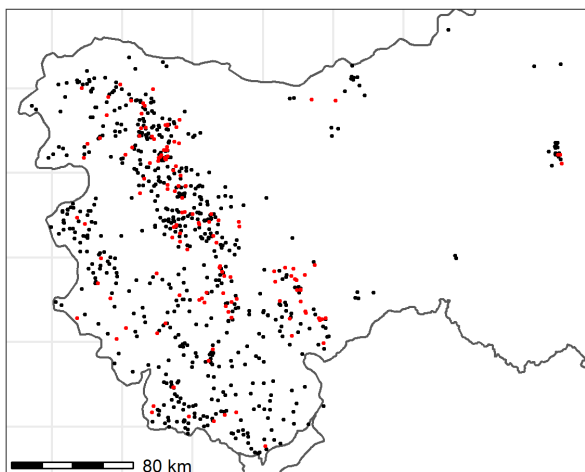

Wasting

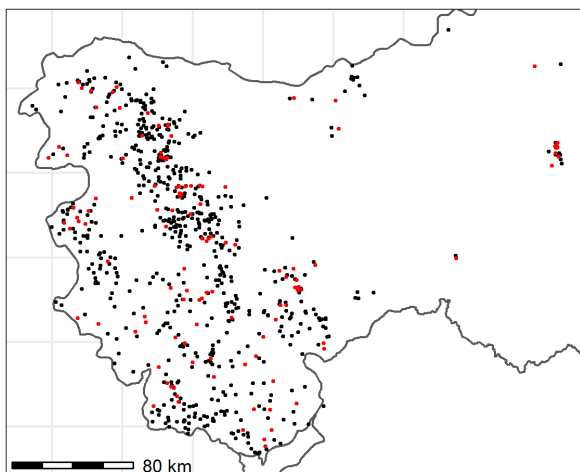

Jharkhand

Fever

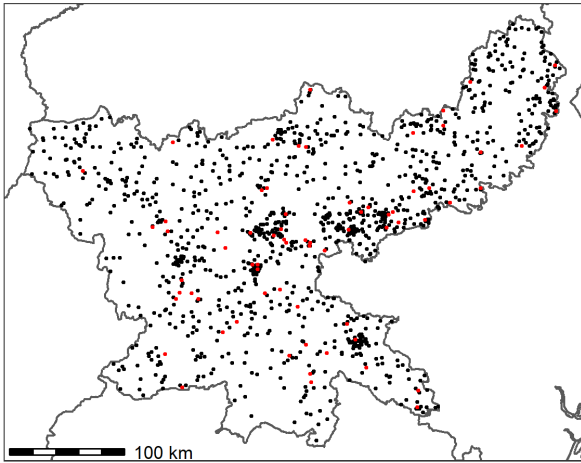

Diarrhoea

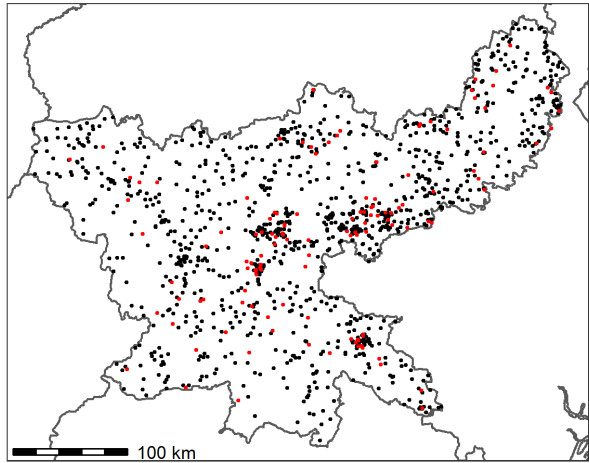

ARI

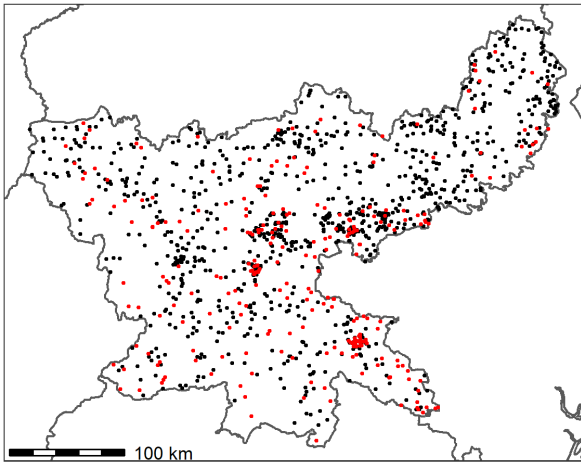

Wasting

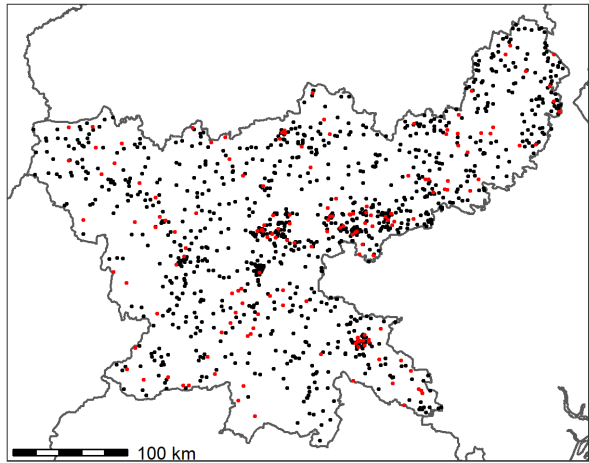

Karnataka

Fever

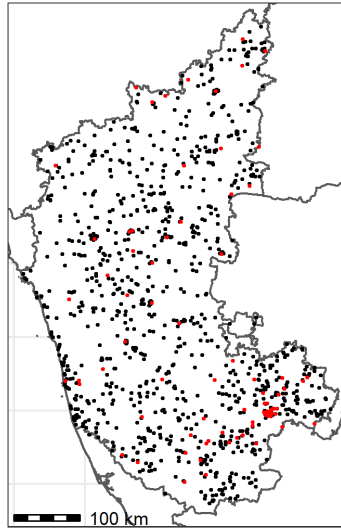

Diarrhoea

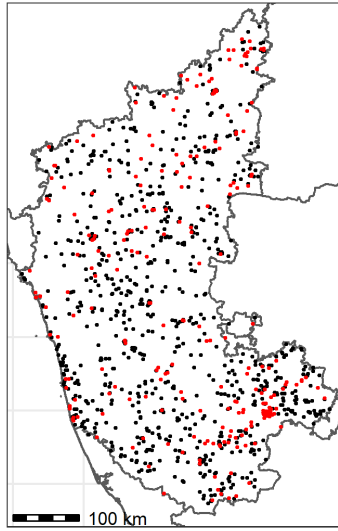

ARI

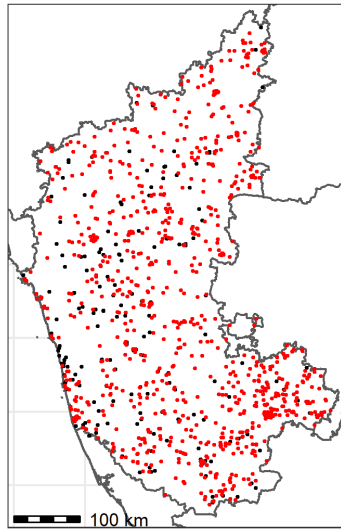

Wasting

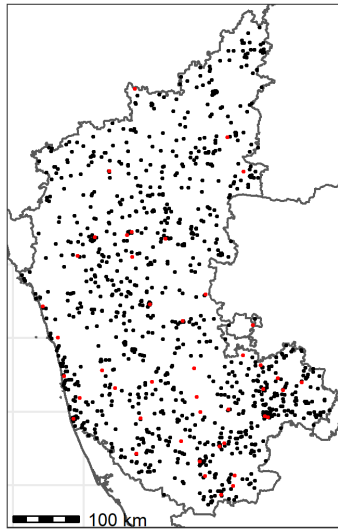

Kenya

Fever

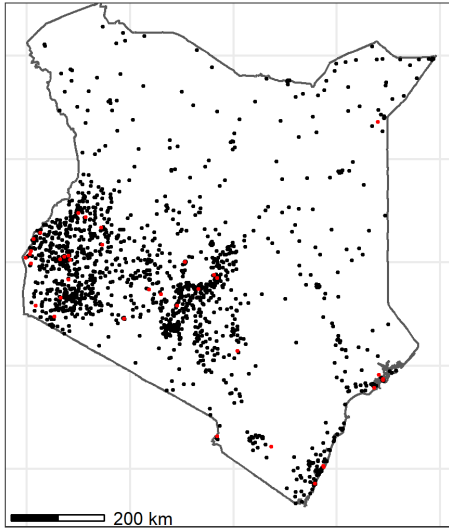

Diarrhoea

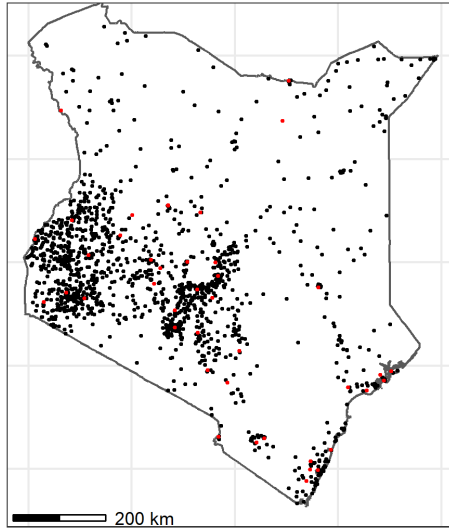

ARI

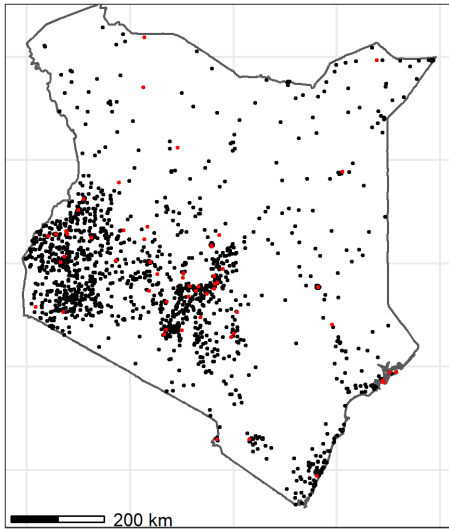

Wasting

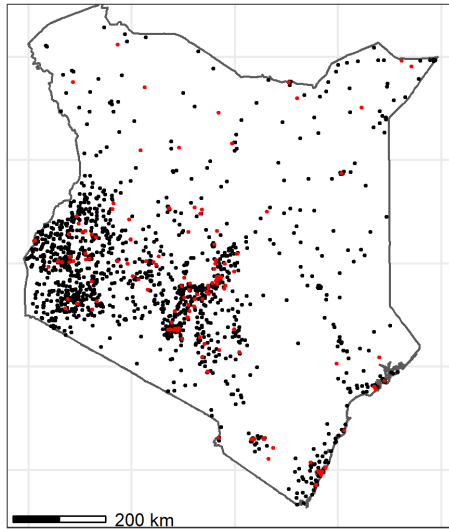

Kerala

Fever

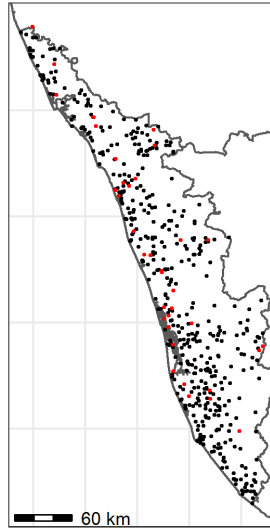

Diarrhoea

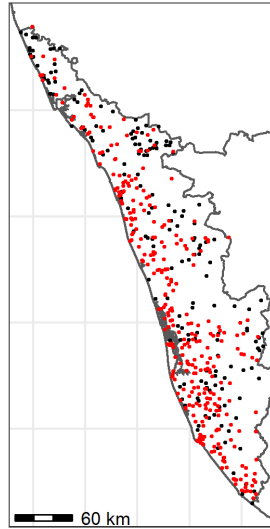

ARI

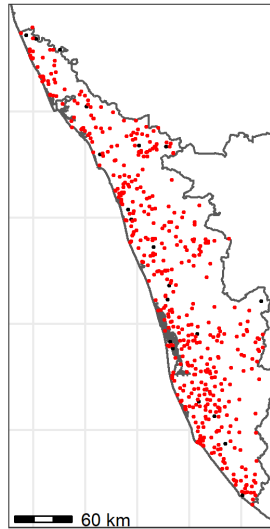

Wasting

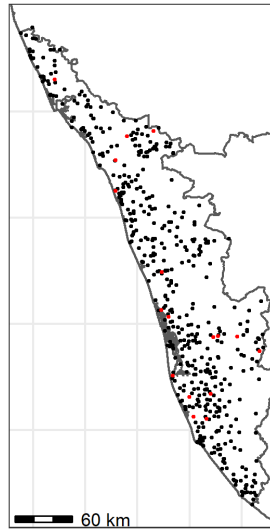

# Lakshadweep

## Fever

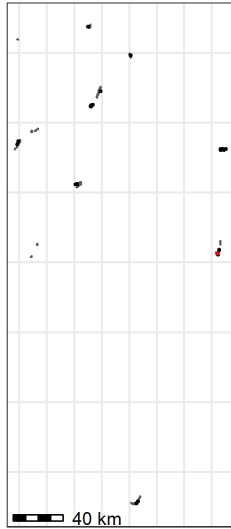

## Diarrhoea

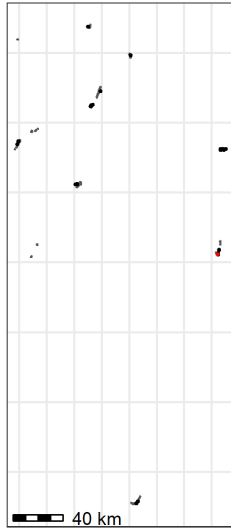

## ARI

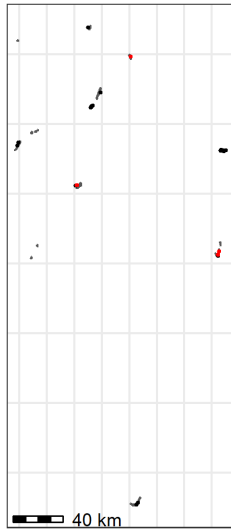

## Wasting

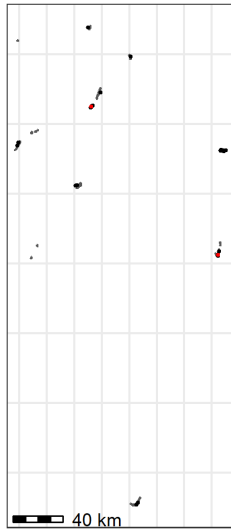



Lesotho

Fever

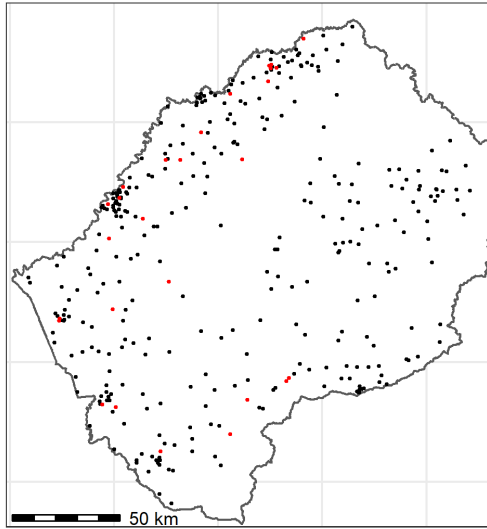

Diarrhoea

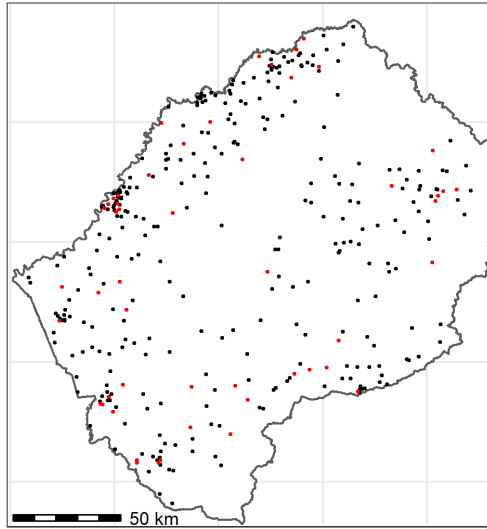

ARI

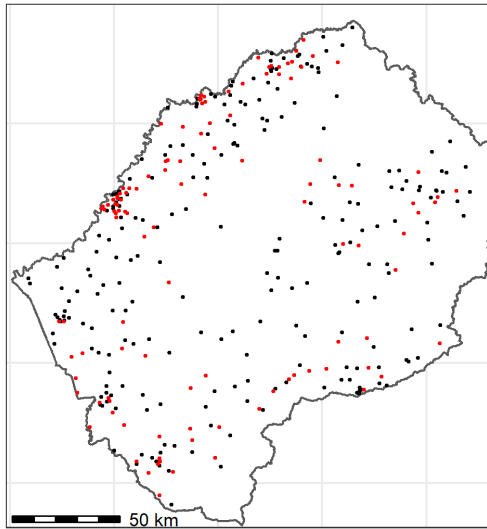

Wasting

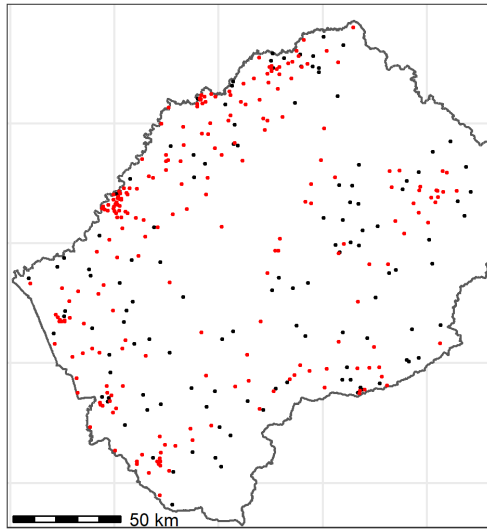

Liberia

Fever

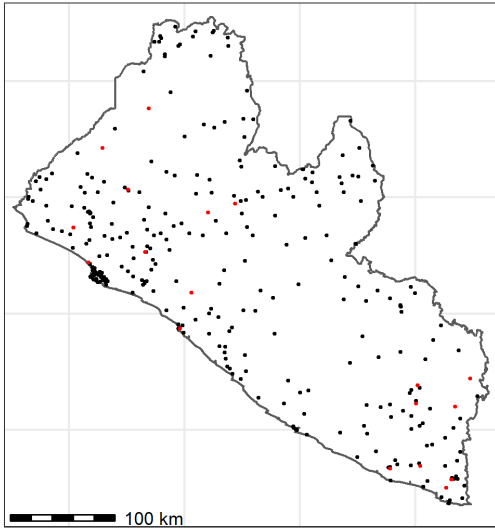

Diarrhoea

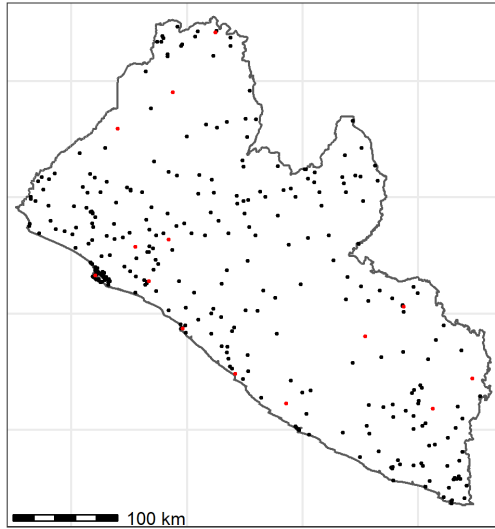

ARI

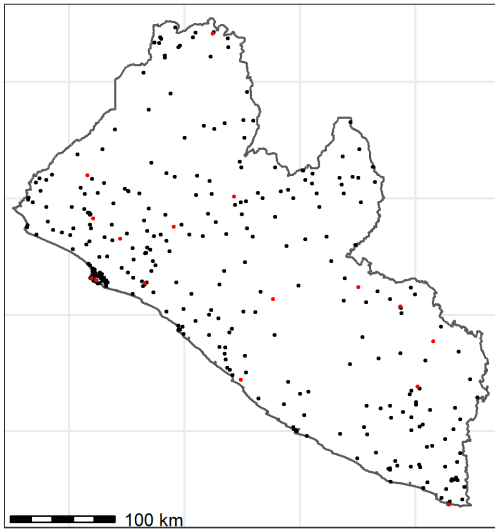

Wasting

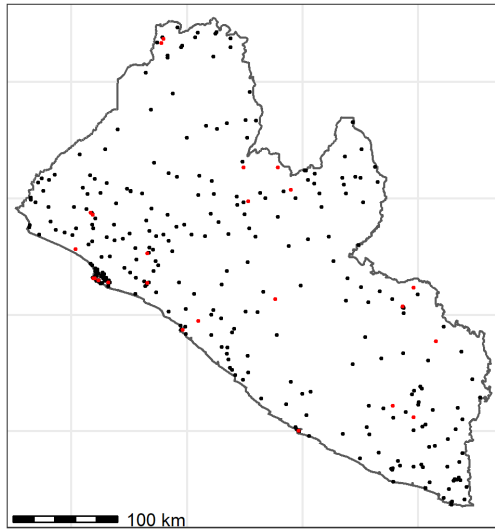

Madhya Pradesh

Fever

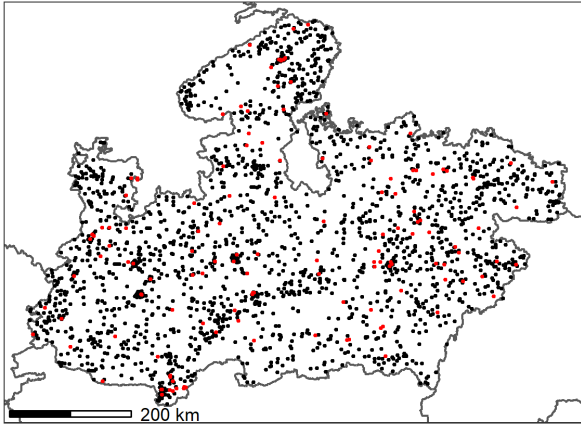

Diarrhoea

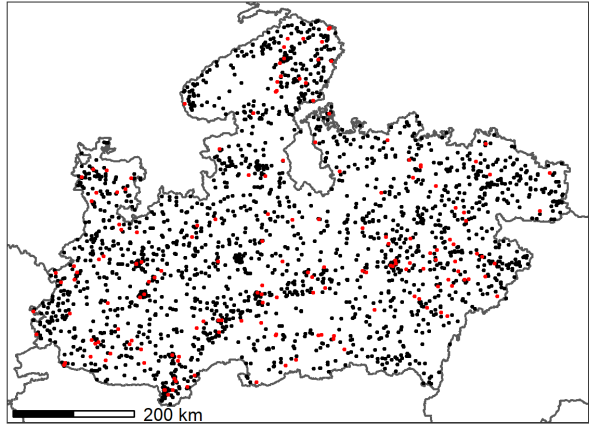

ARI

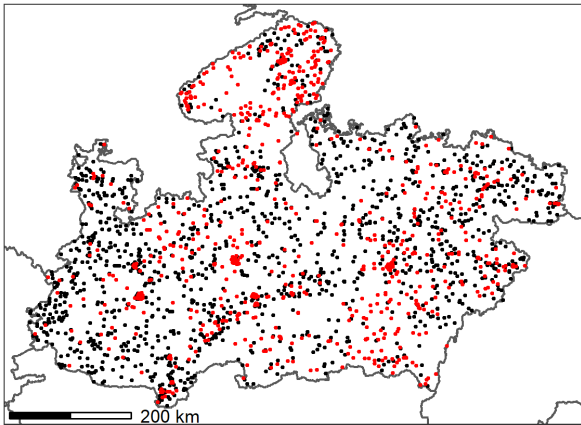

Wasting

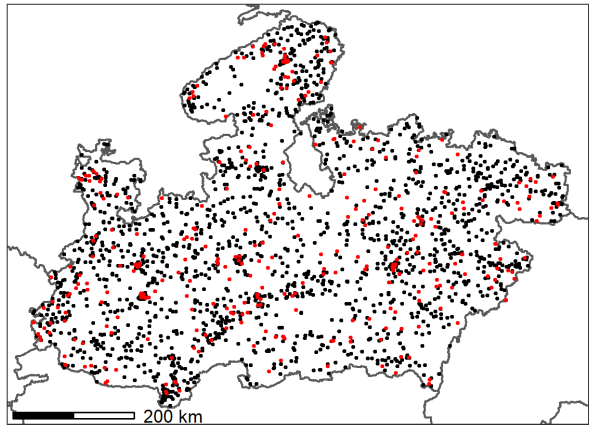

Arunachal Pradesh

Fever

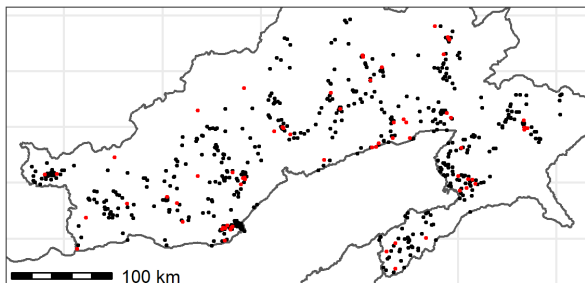

Diarrhoea

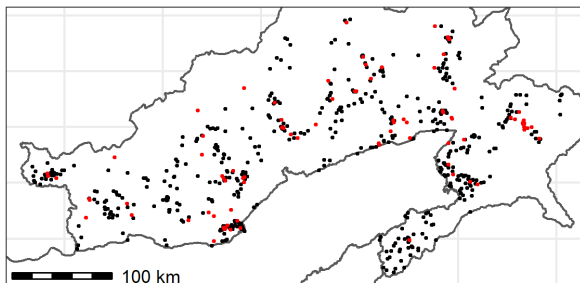

ARI

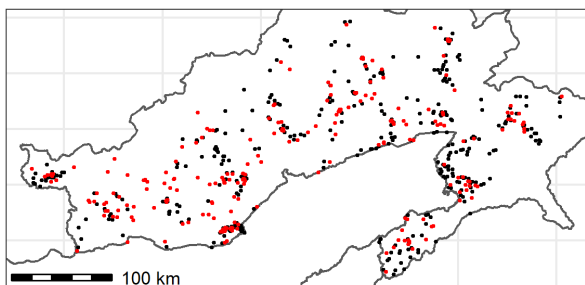

Wasting

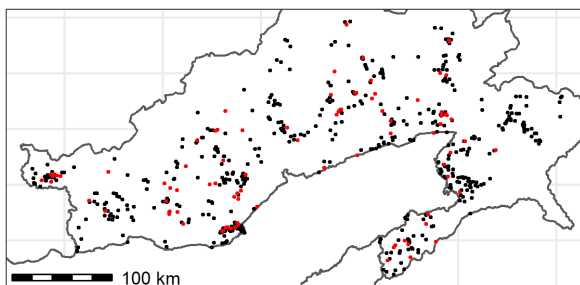

Maharashtra

Fever

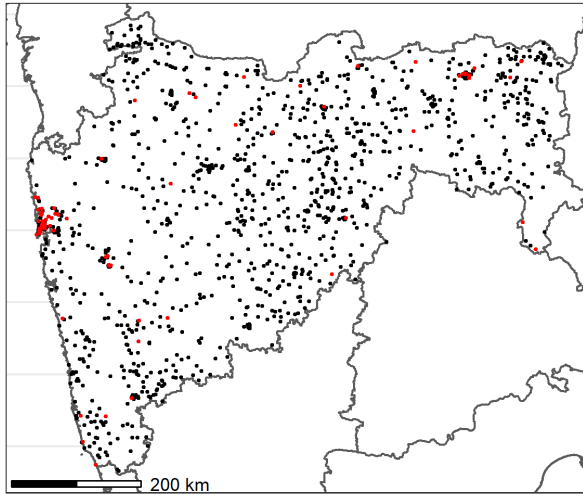

Diarrhoea

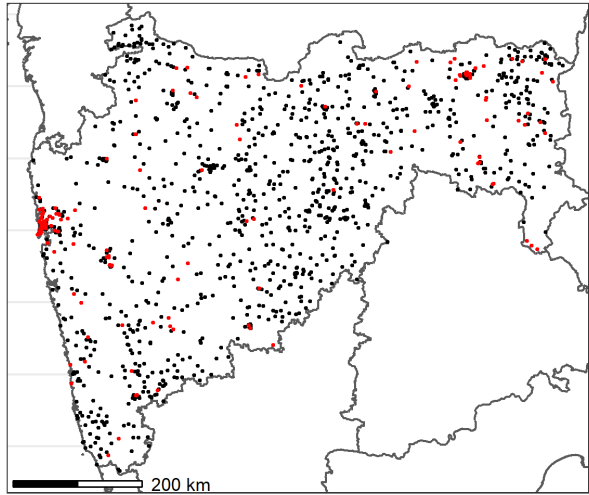

ARI

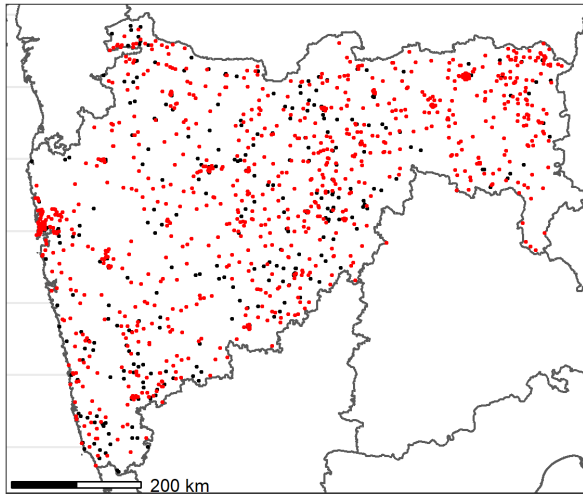

Wasting

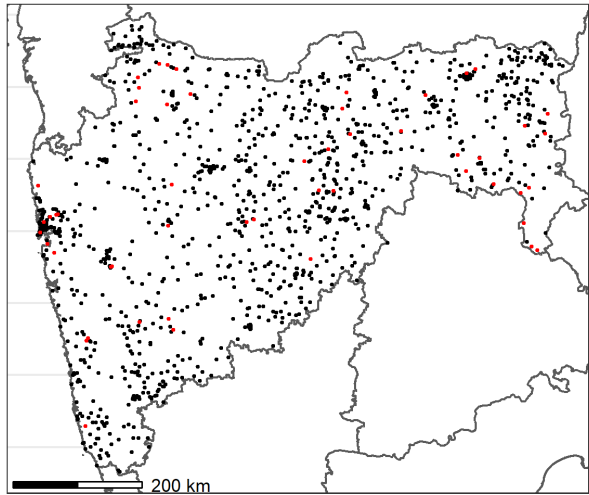

Malawi

Fever

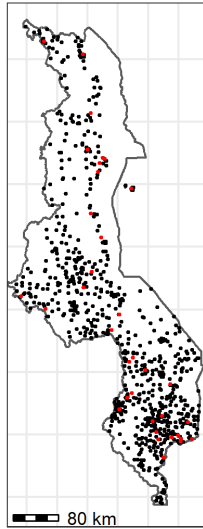

Diarrhoea

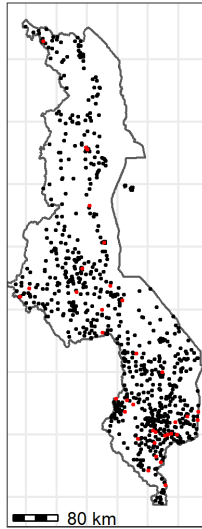

ARI

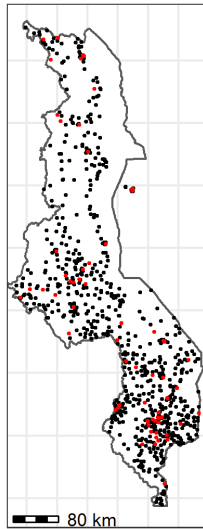

Wasting

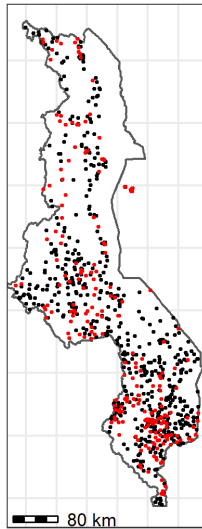

Mali

Fever

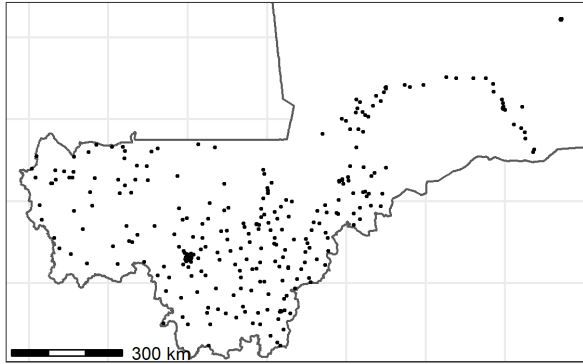

Diarrhoea

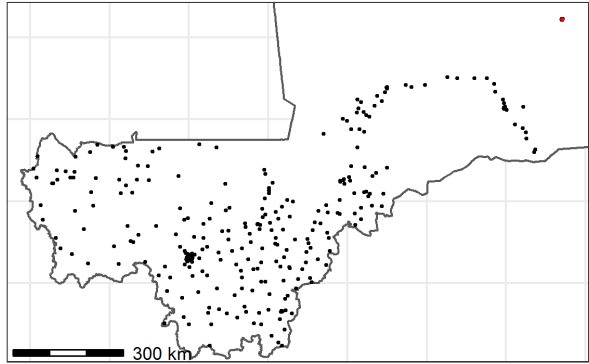

ARI

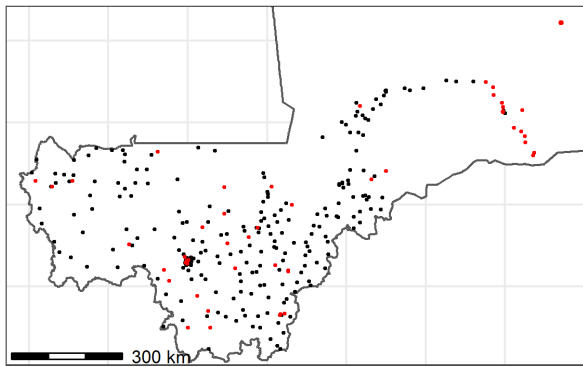

Wasting

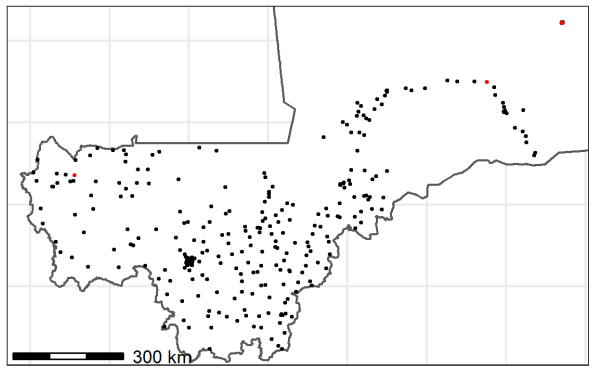

Manipur

Fever

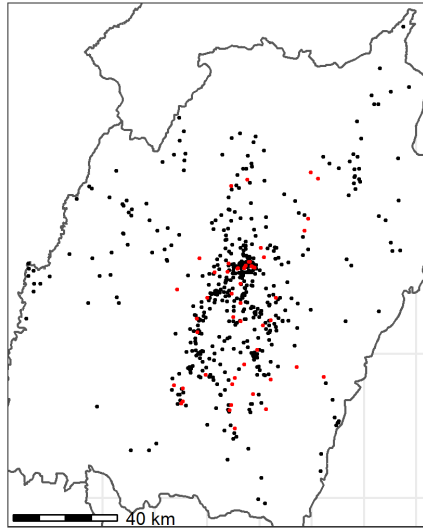

Diarrhoea

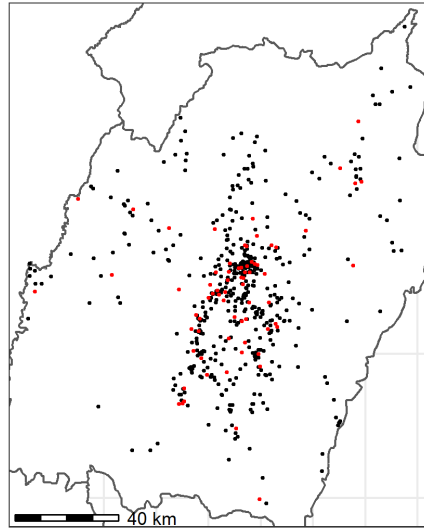

ARI

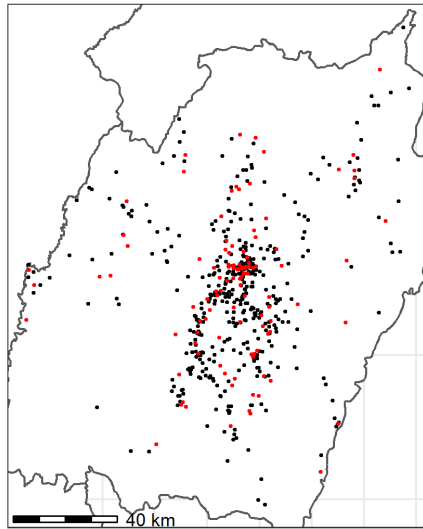

Wasting

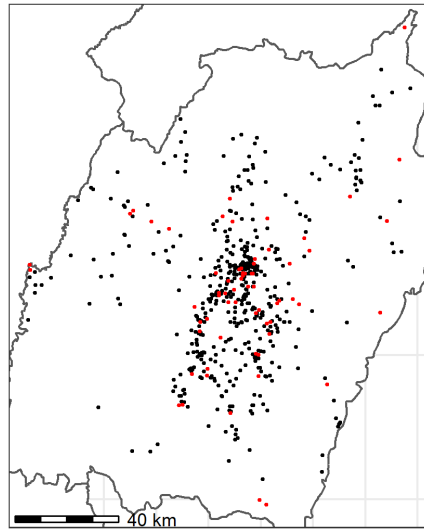



Meghalaya

Fever

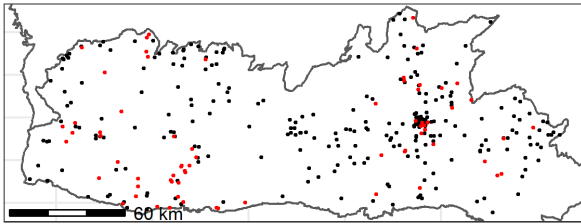

Diarrhoea

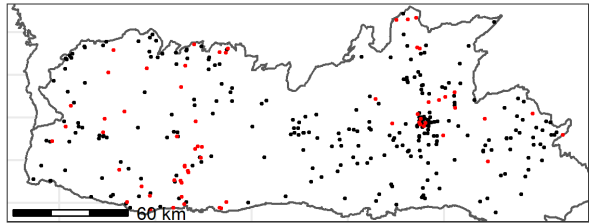

ARI

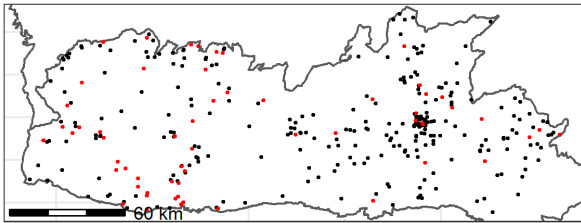

Wasting

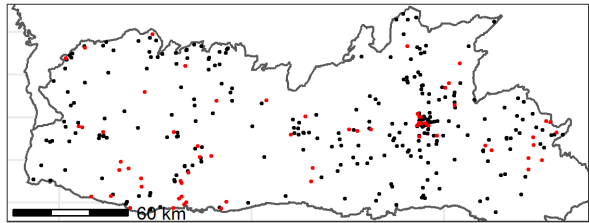

Mizoram

Fever

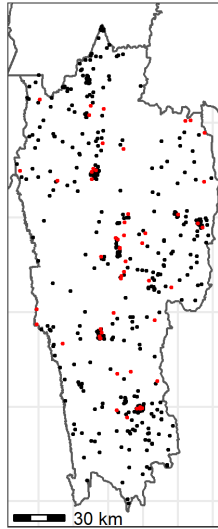

Diarrhoea

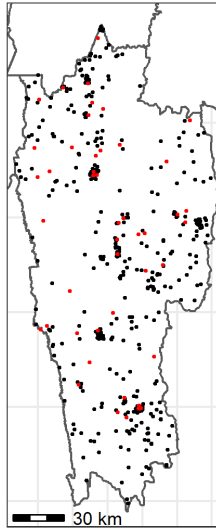

ARI

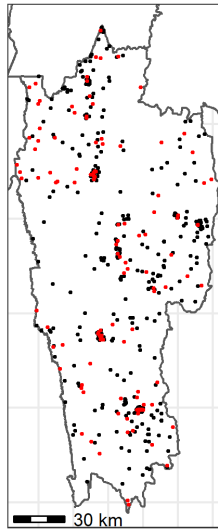

Wasting

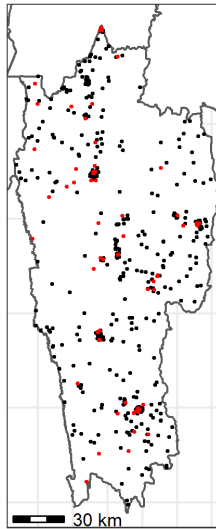

Mozambique

Fever

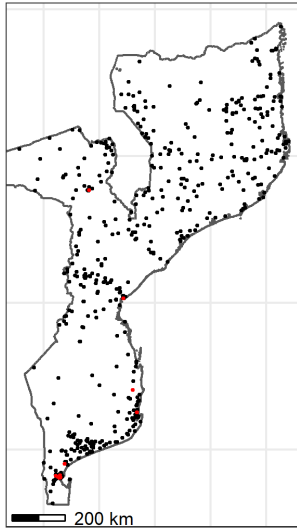

Diarrhoea

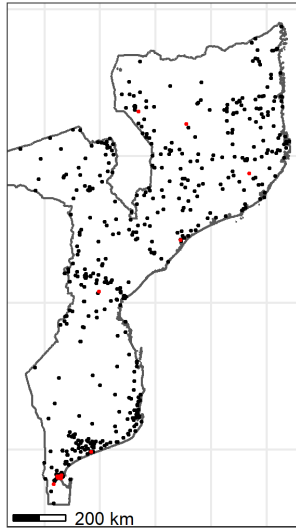

ARI

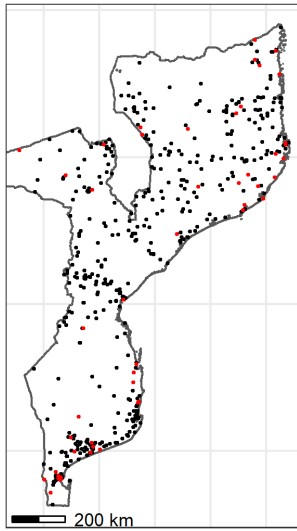

Wasting

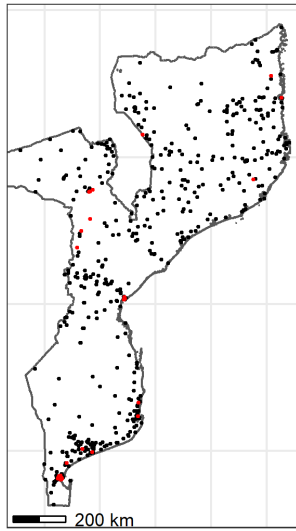

Myanmar

Fever

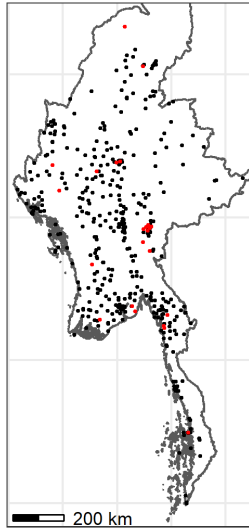

Diarrhoea

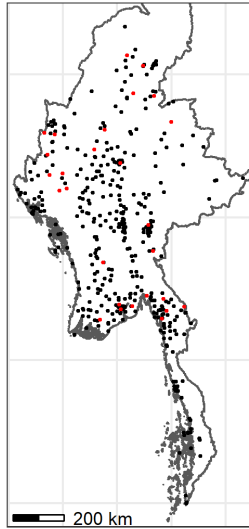

ARI

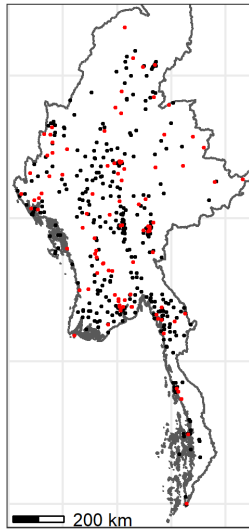

Wasting

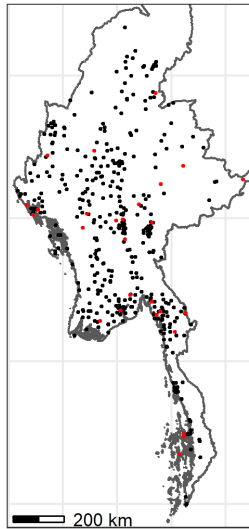

Nagaland

Fever

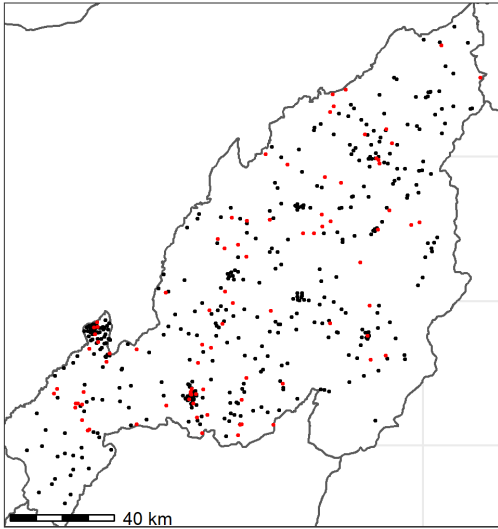

Diarrhoea

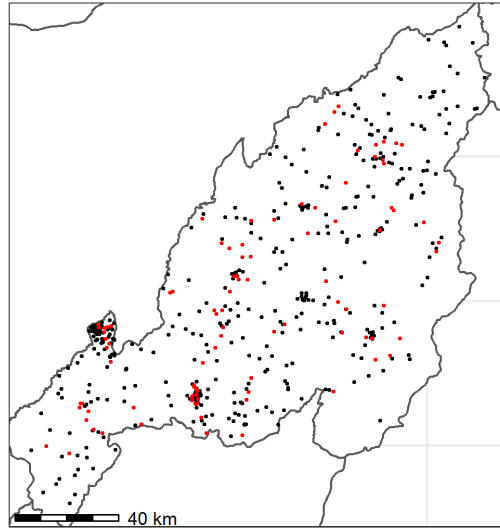

ARI

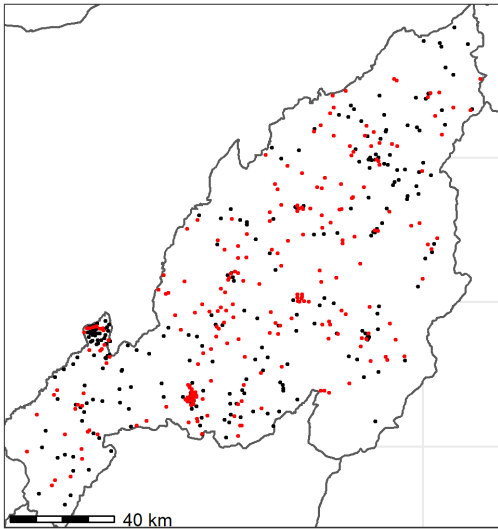

Wasting

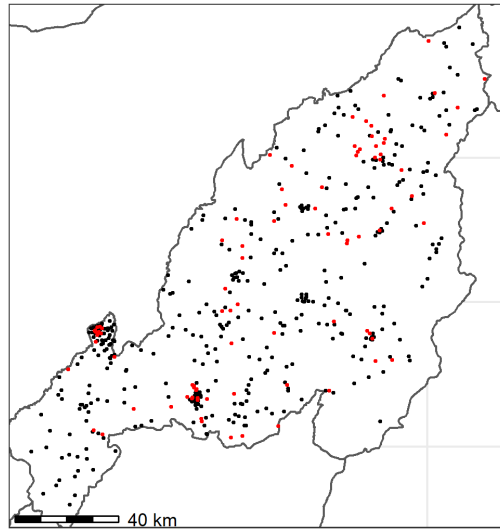

Namibia

Fever

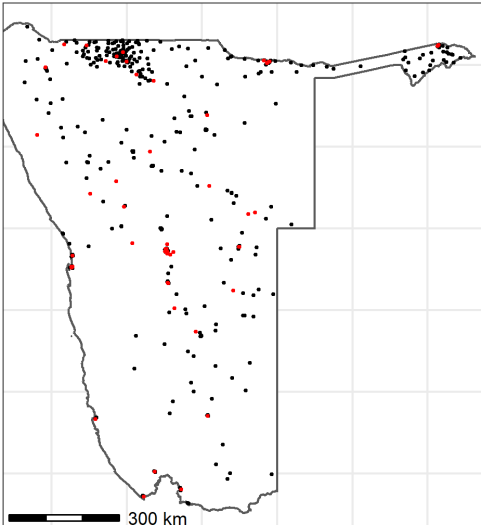

Diarrhoea

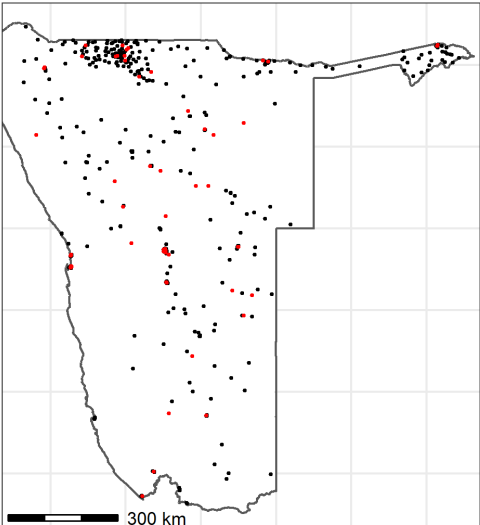

ARI

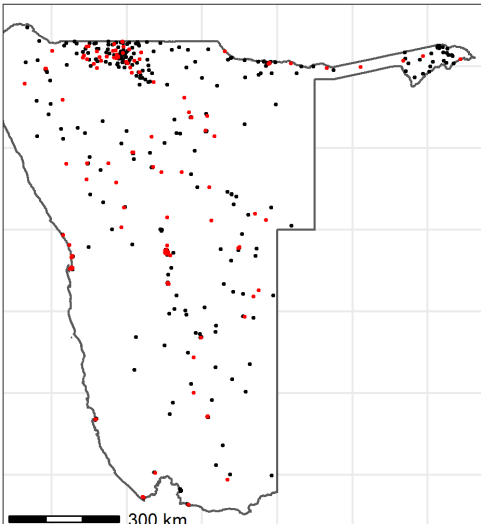

Wasting

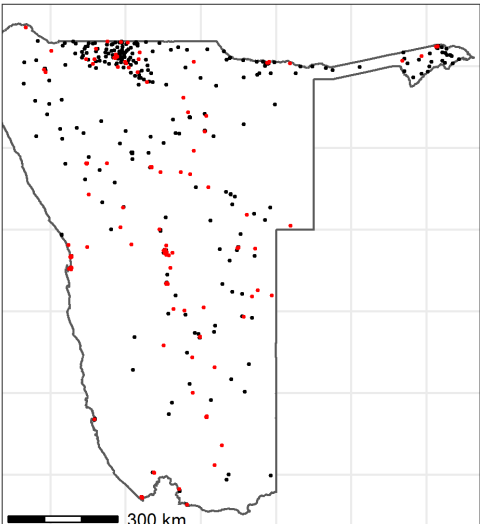

Assam

Fever

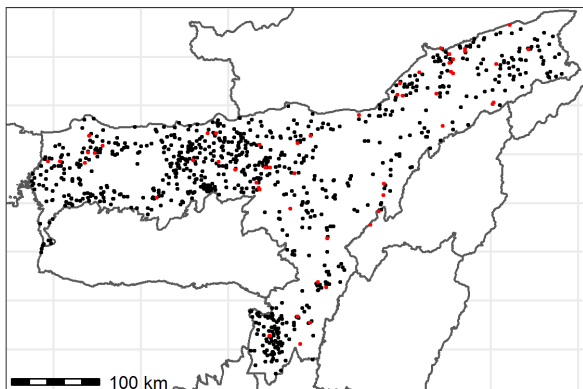

Diarrhoea

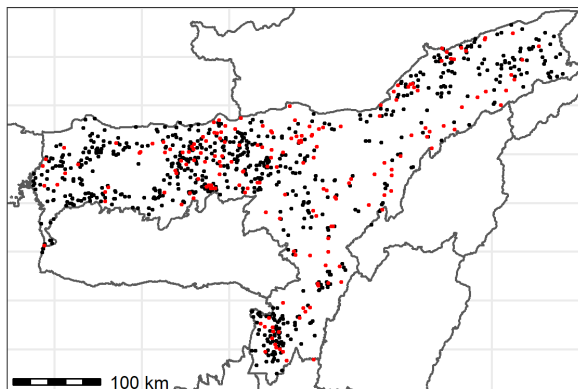

ARI

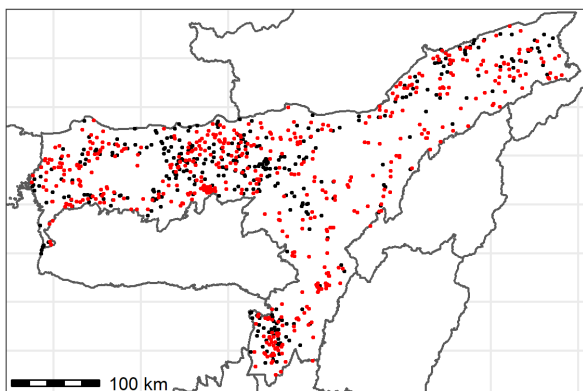

Wasting

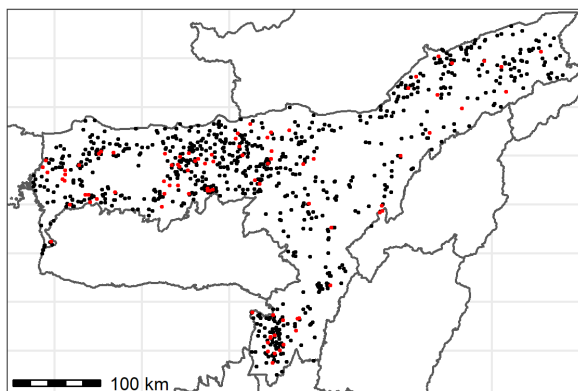

NCT of Delhi

Fever

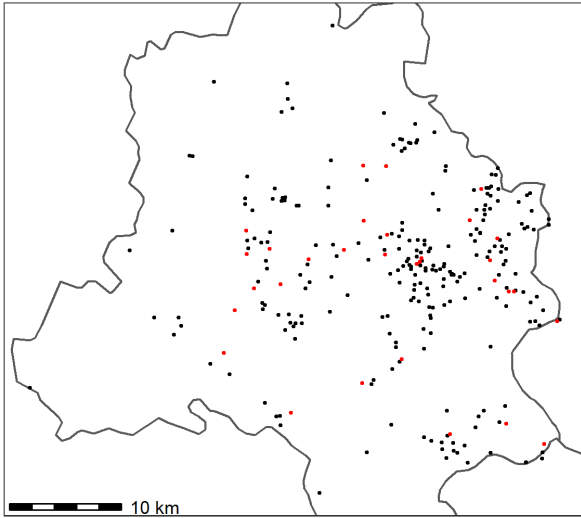

Diarrhoea

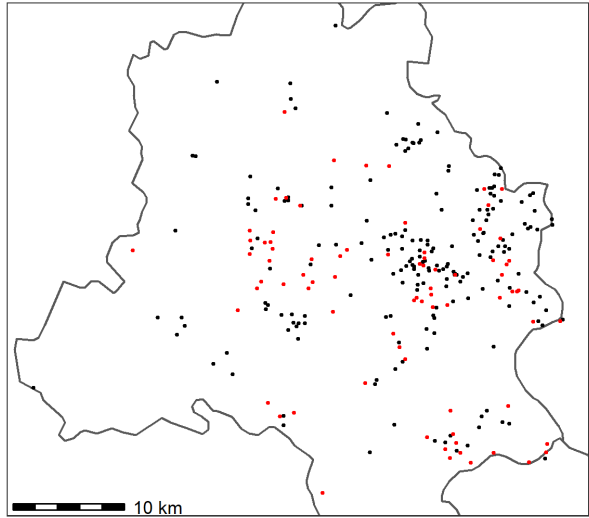

ARI

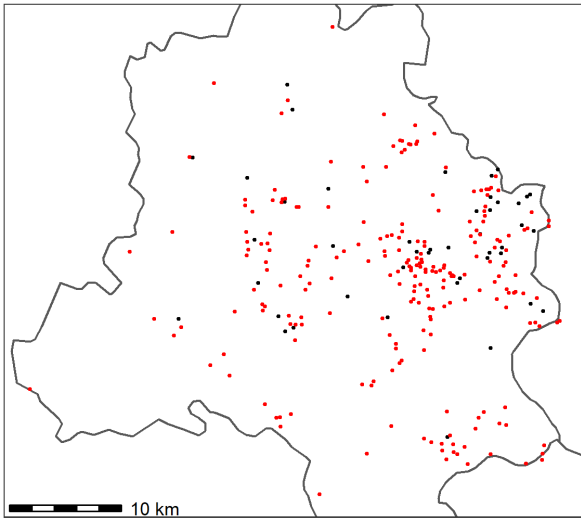

Wasting

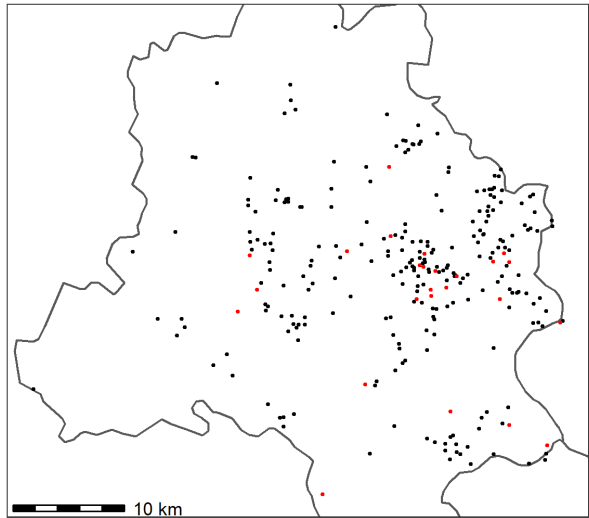



Nepal

Fever

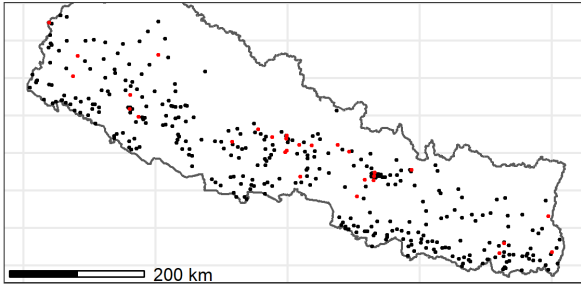

Diarrhoea

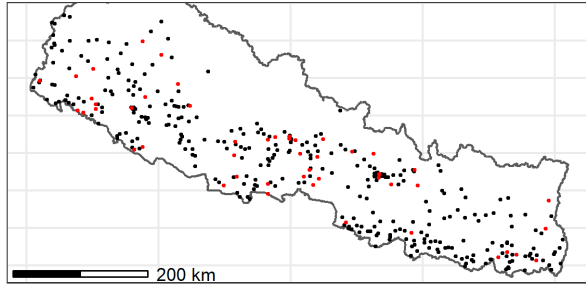

ARI

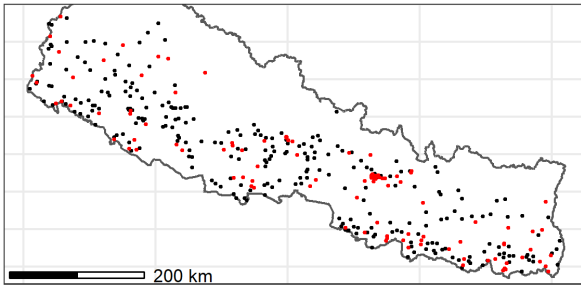

Wasting

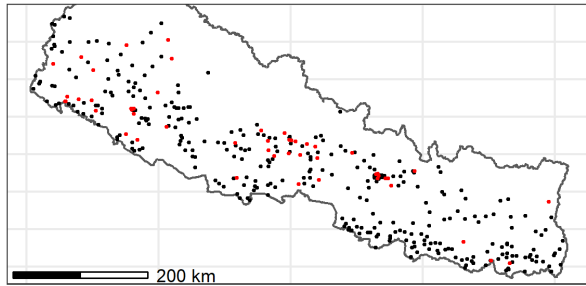

Nigeria

Fever

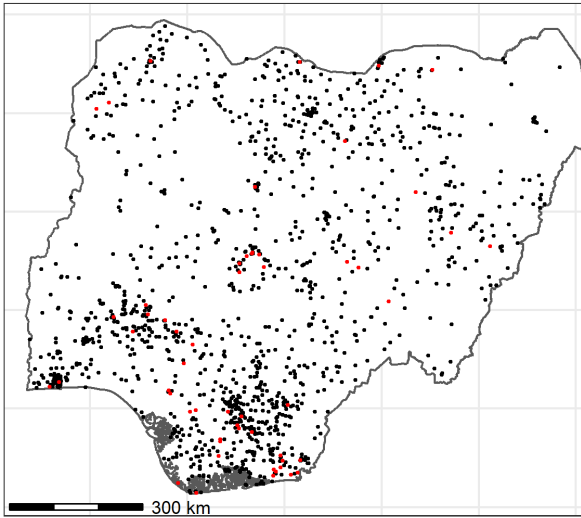

Diarrhoea

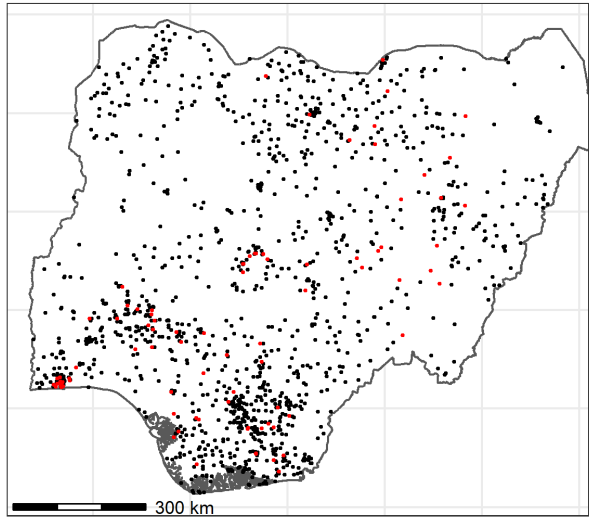

ARI

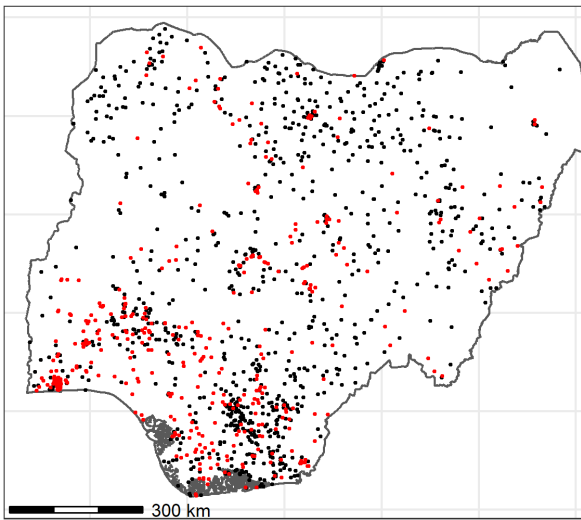

Wasting

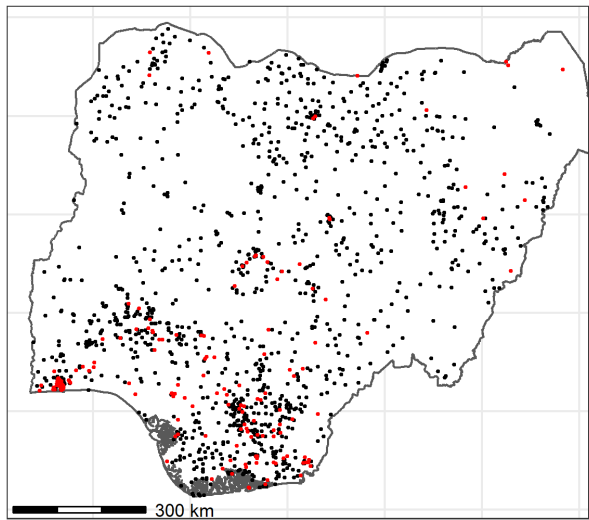

Odisha

Fever

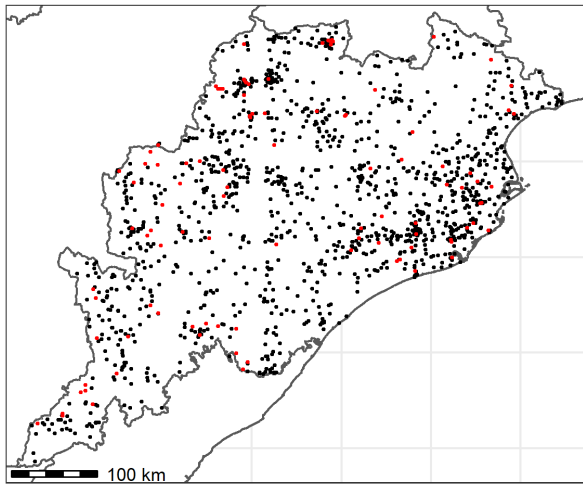

Diarrhoea

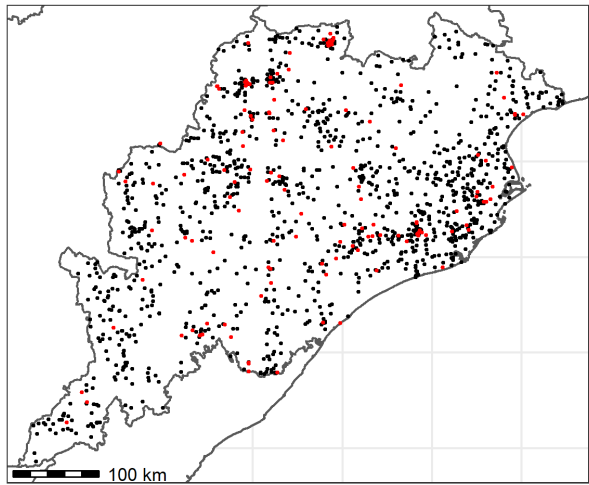

ARI

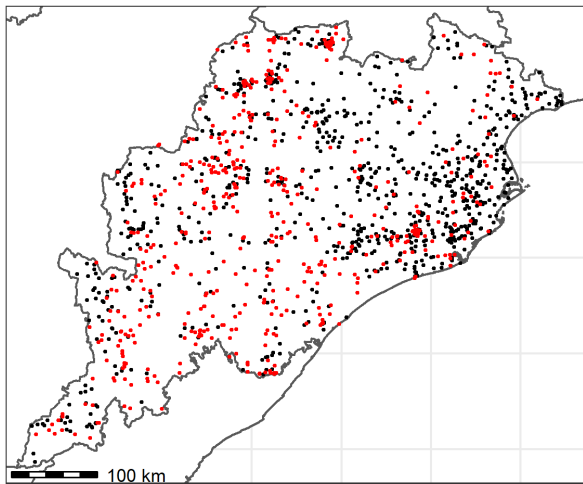

Wasting

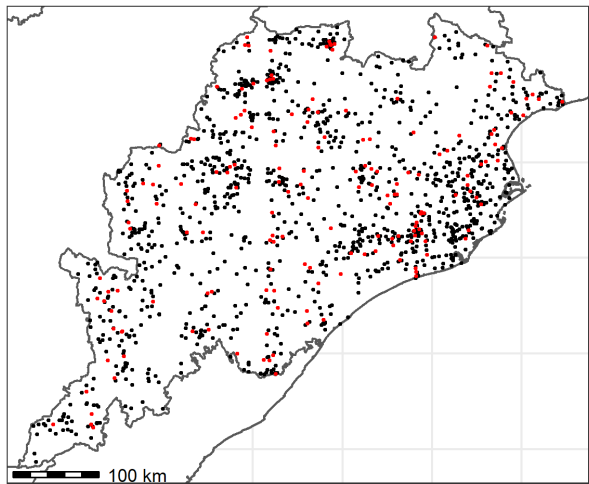

Pakistan

Fever

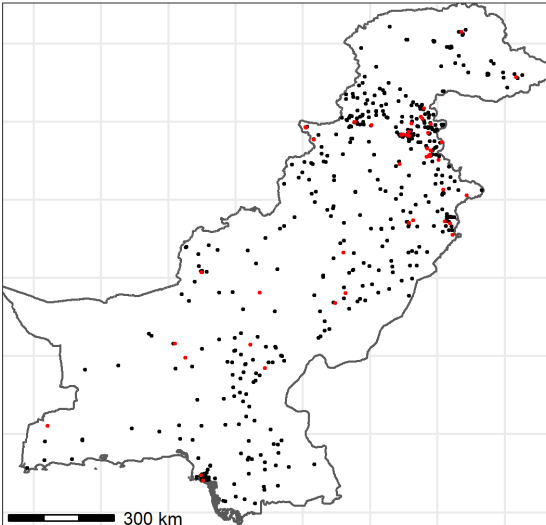

Diarrhoea

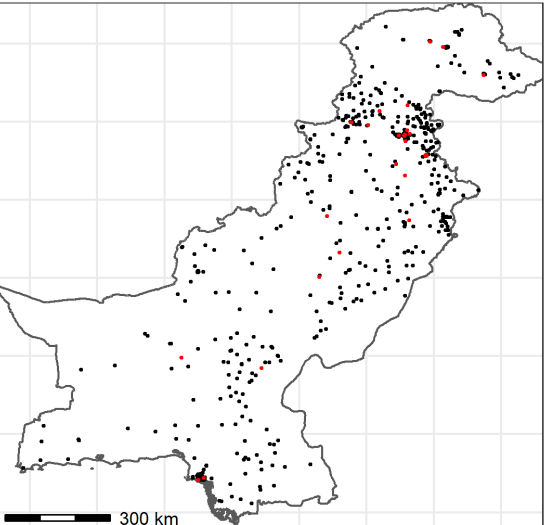

ARI

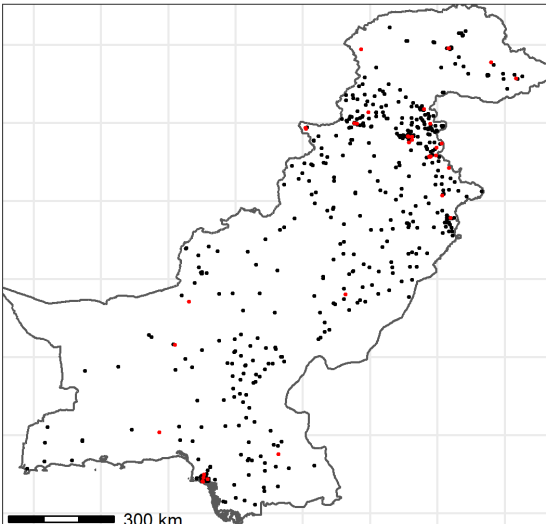

Wasting

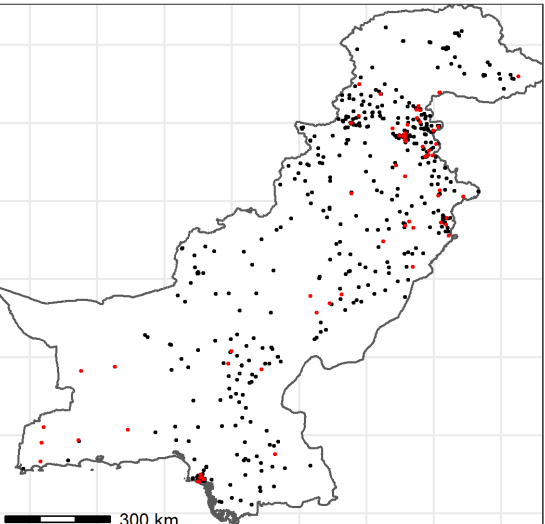

Puducherry

Fever

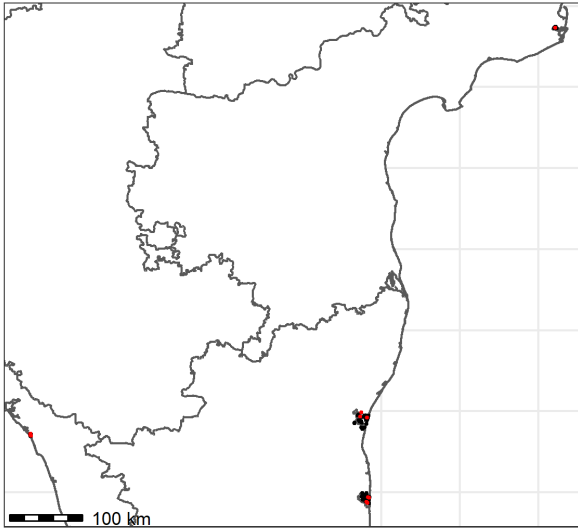

Diarrhoea

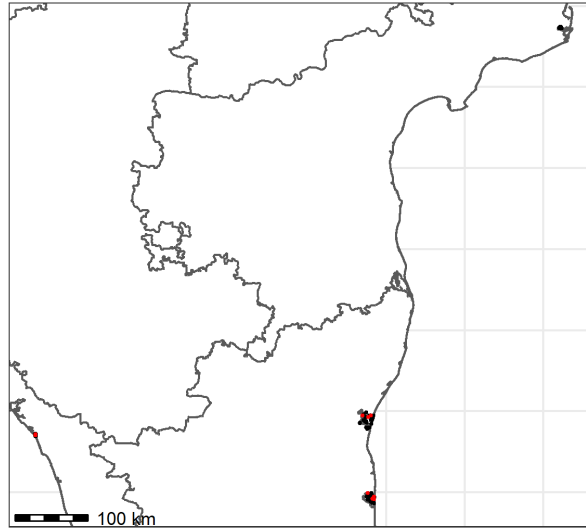

ARI

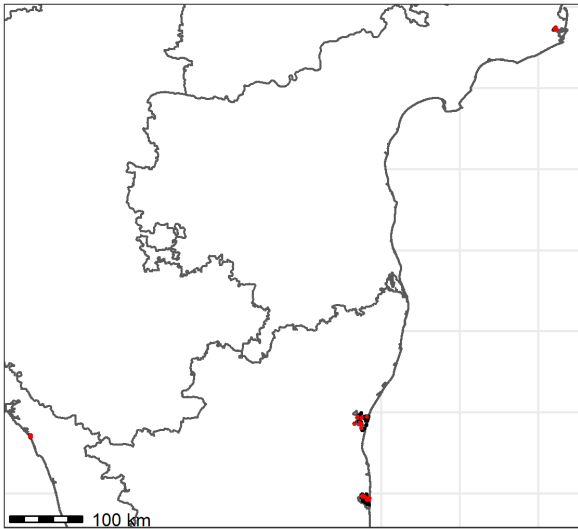

Wasting

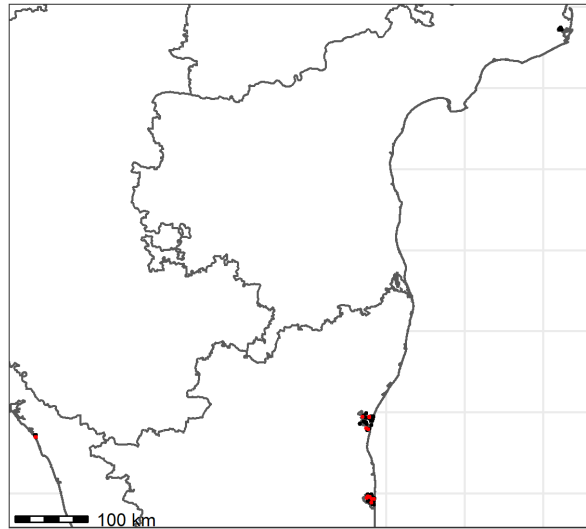

Punjab

Fever

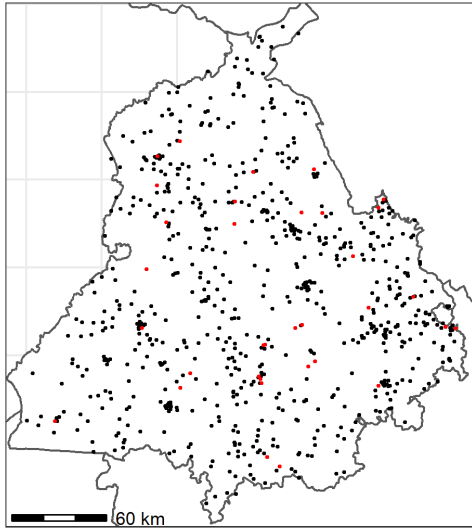

Diarrhoea

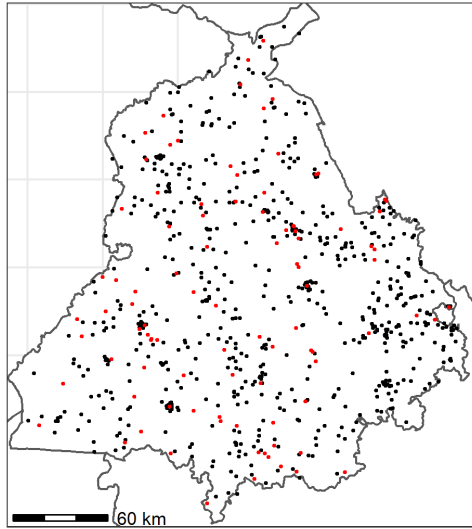

ARI

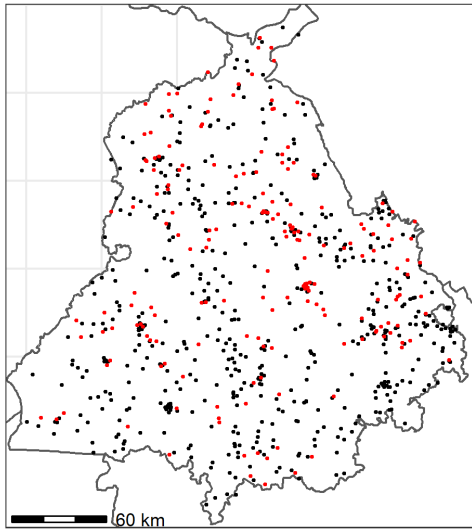

Wasting

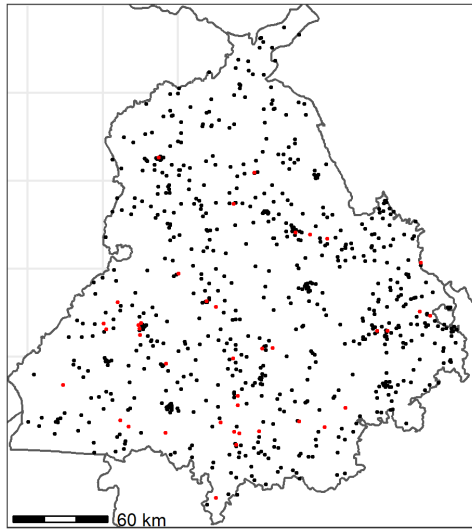

Rajasthan

Fever

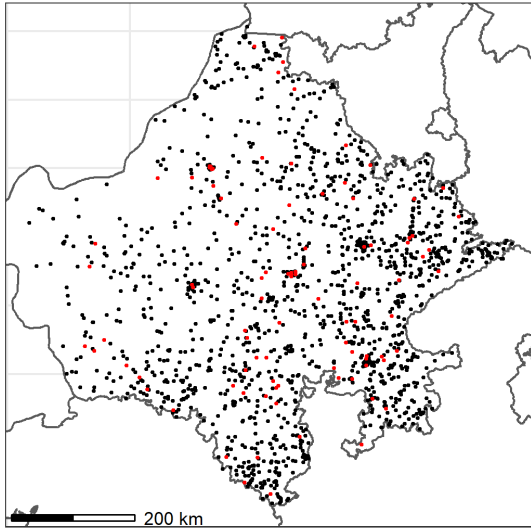

Diarrhoea

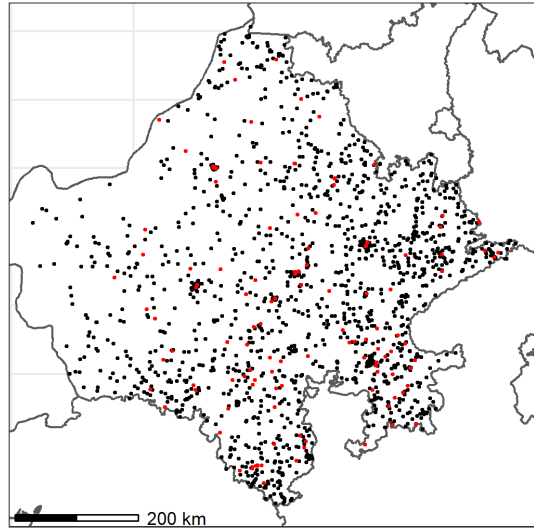

ARI

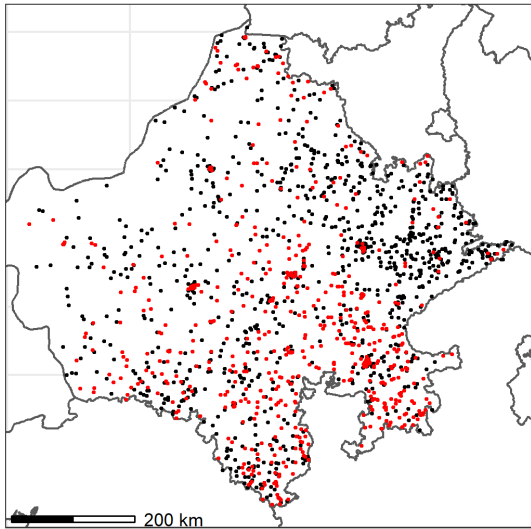

Wasting

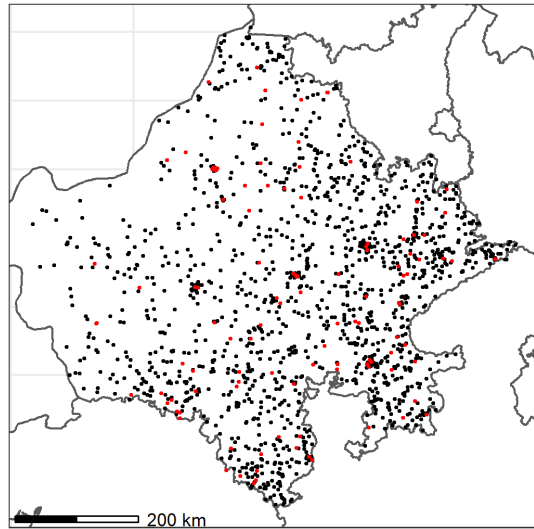

Rwanda

Fever

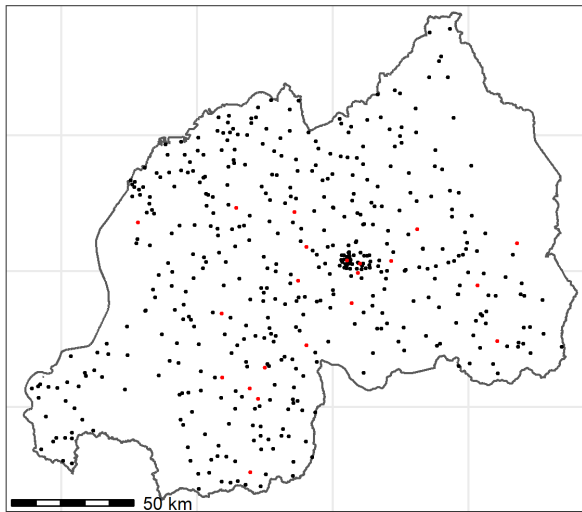

Diarrhoea

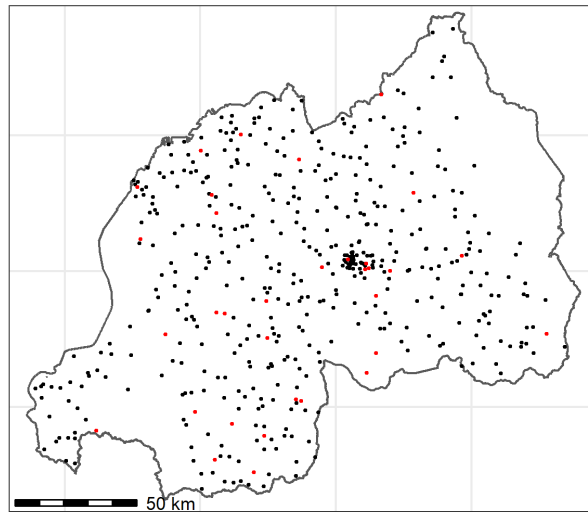

ARI

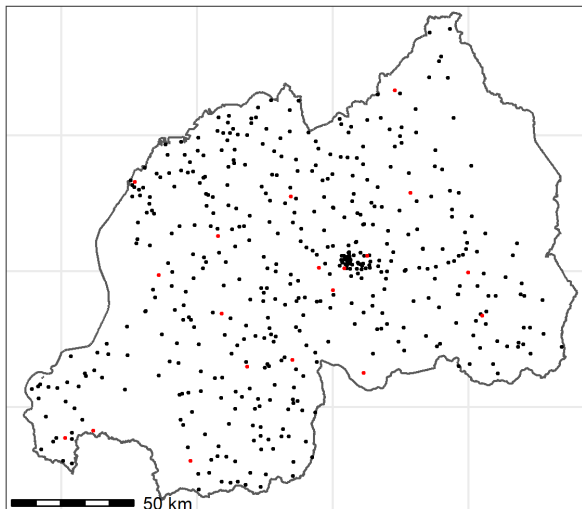

Wasting

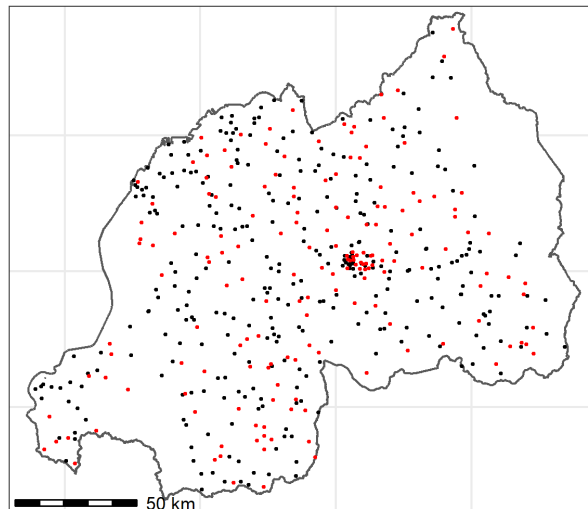



Senegal

Fever

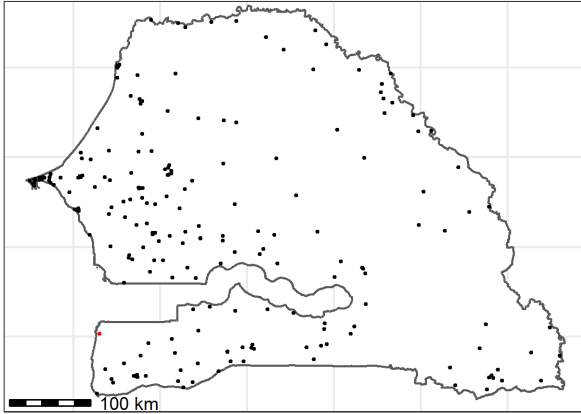

Diarrhoea

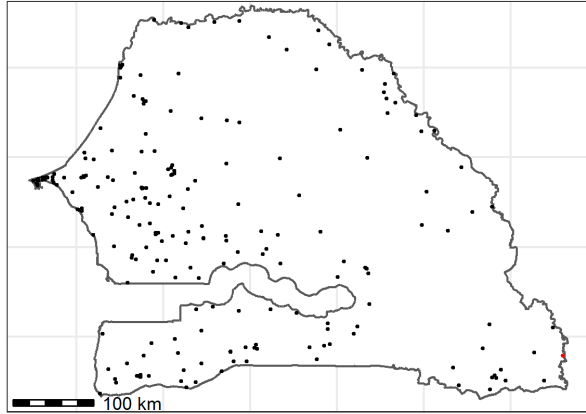

ARI

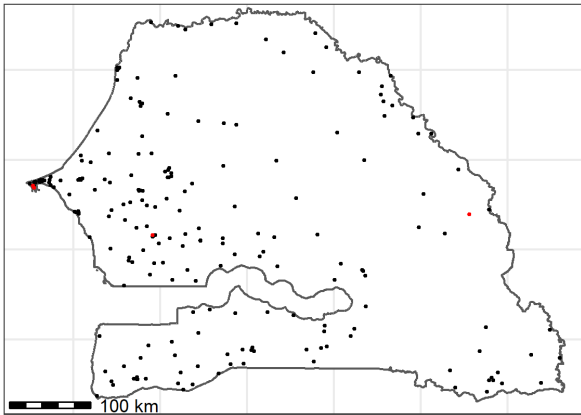

Wasting

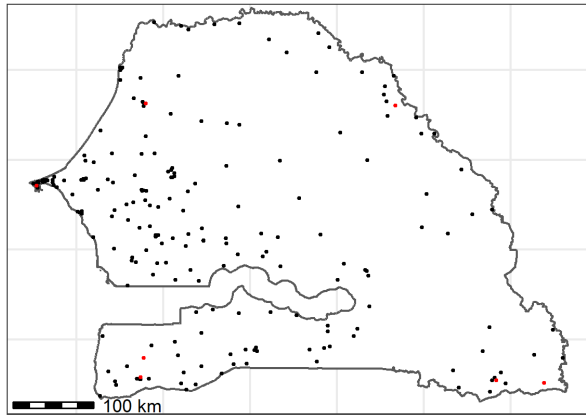

Bangladesh

Fever

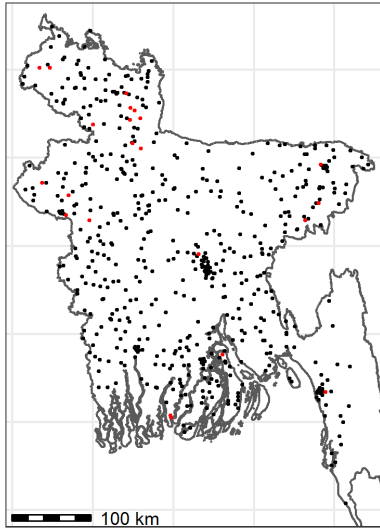

Diarrhoea

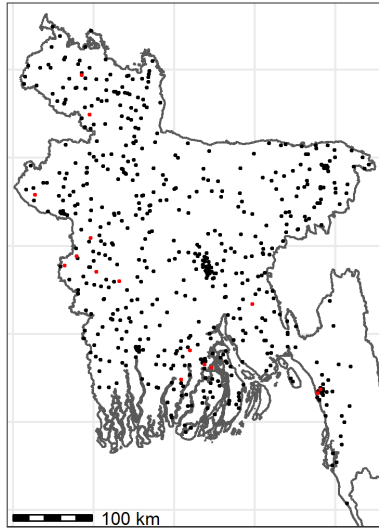

ARI

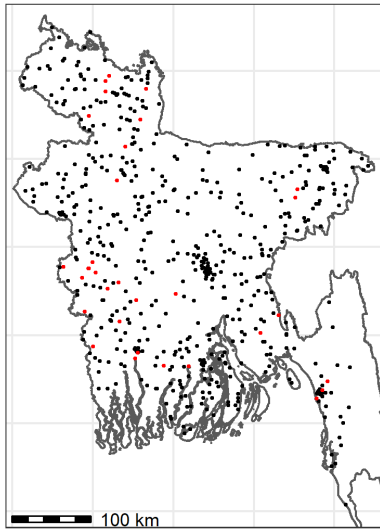

Wasting

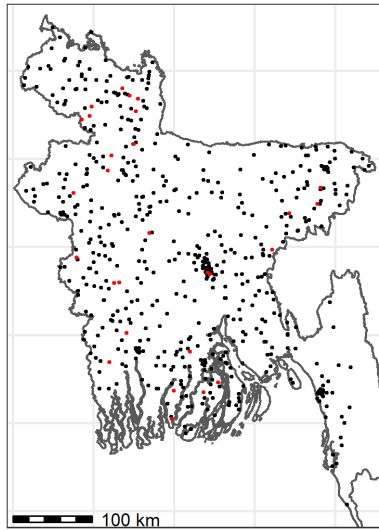

Sierra Leone

Fever

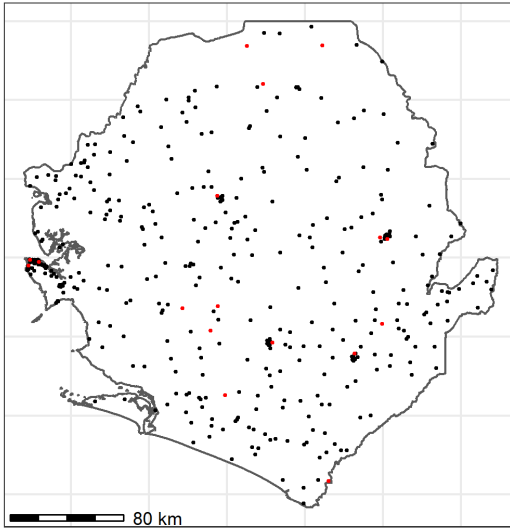

Diarrhoea

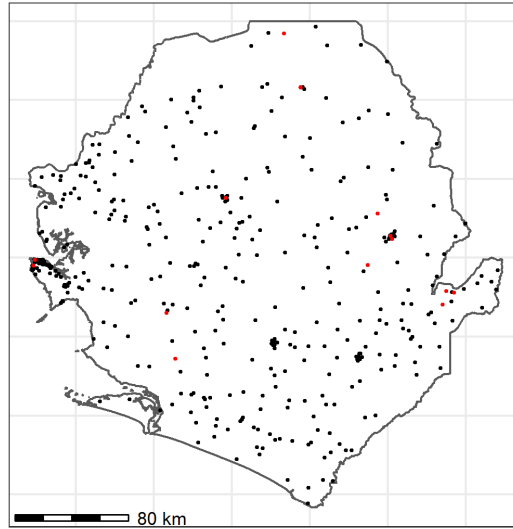

ARI

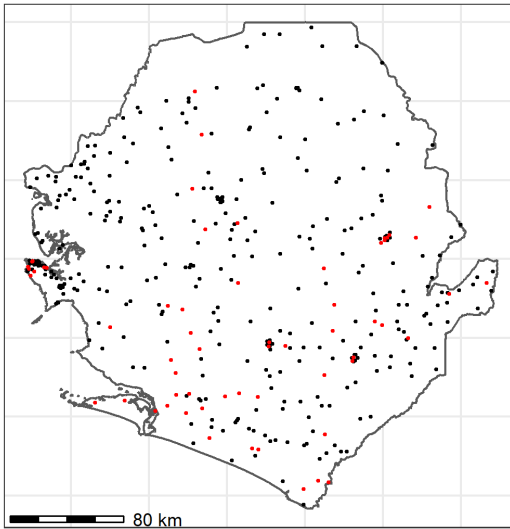

Wasting

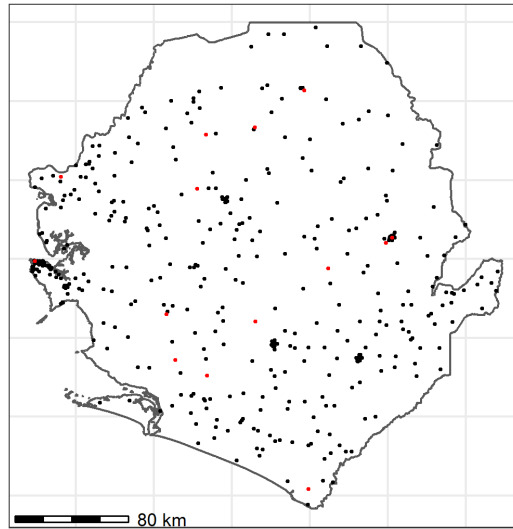

Sikkim

Fever

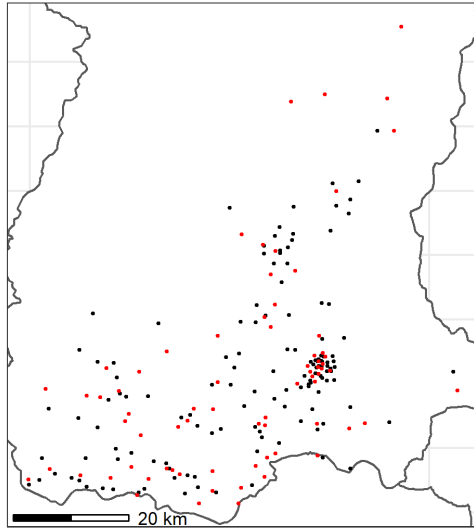

Diarrhoea

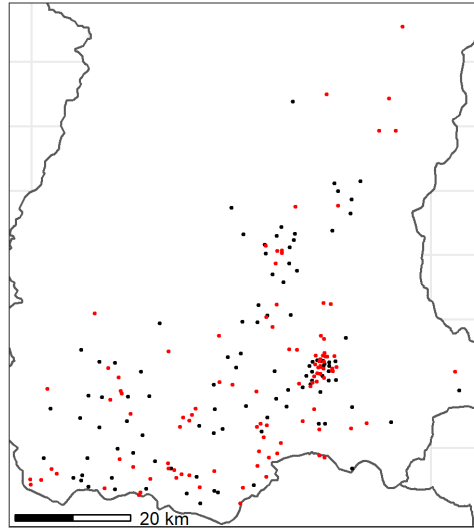

ARI

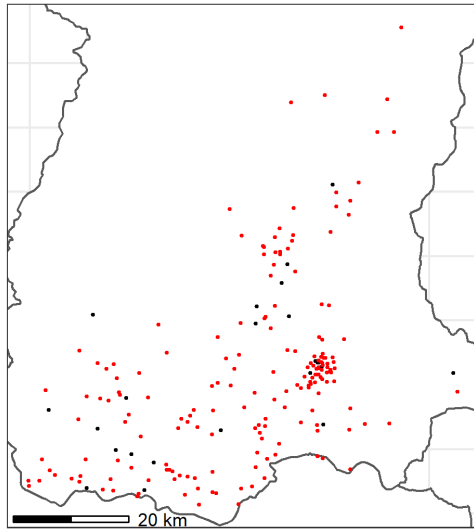

Wasting

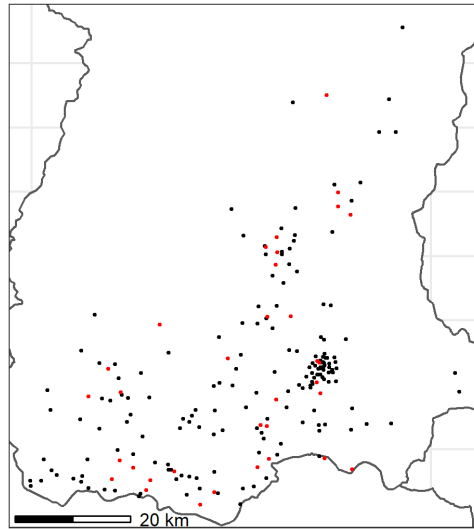

South Africa

Fever

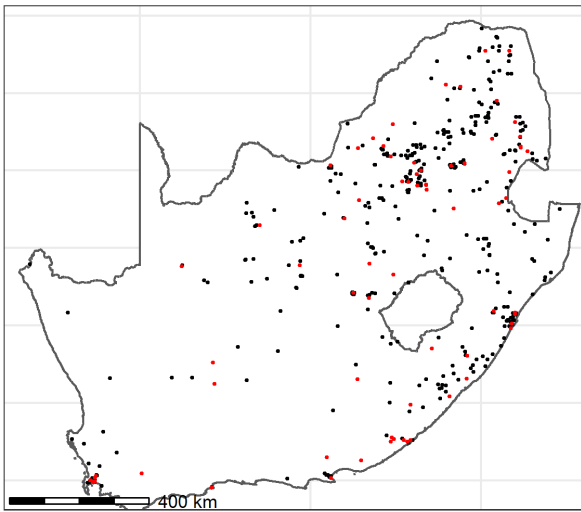

Diarrhoea

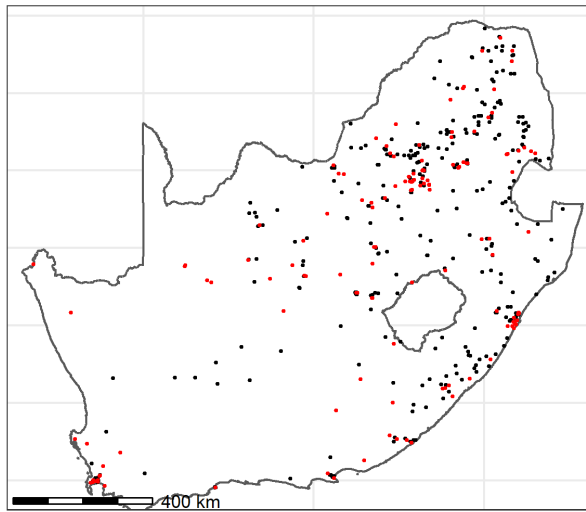

ARI

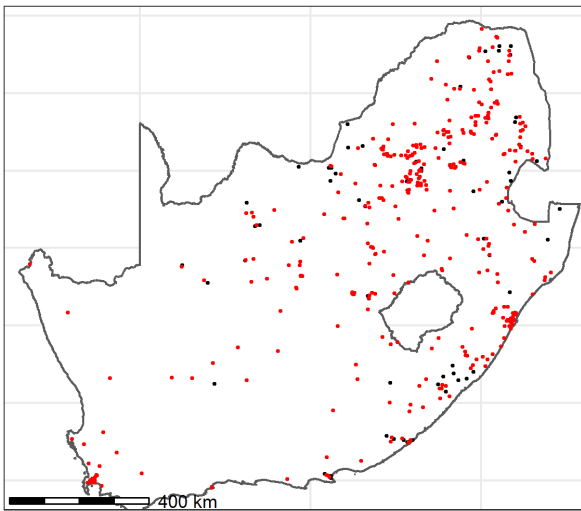

Wasting

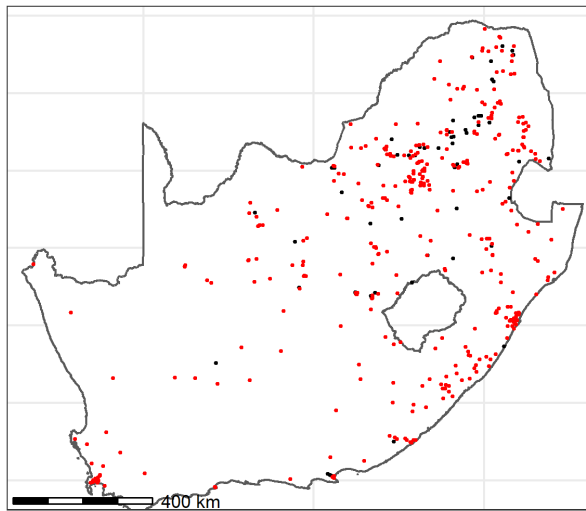

Tamil Nadu

Fever

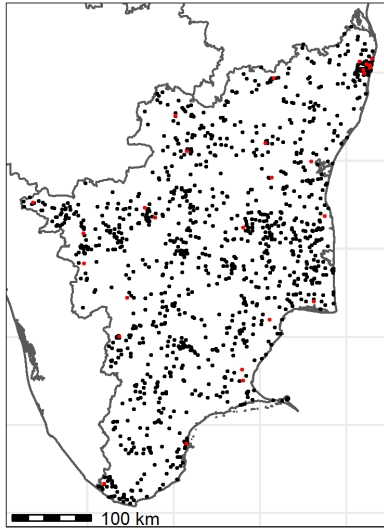

Diarrhoea

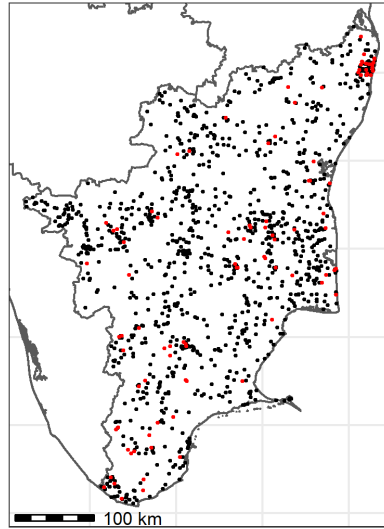

ARI

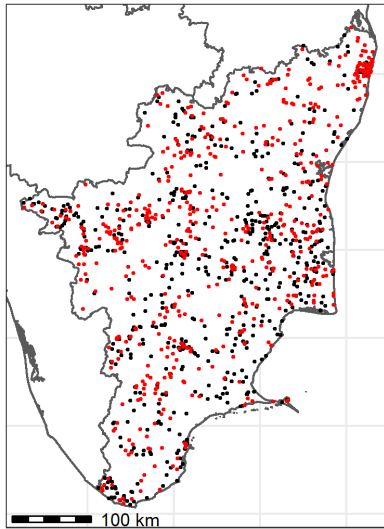

Wasting

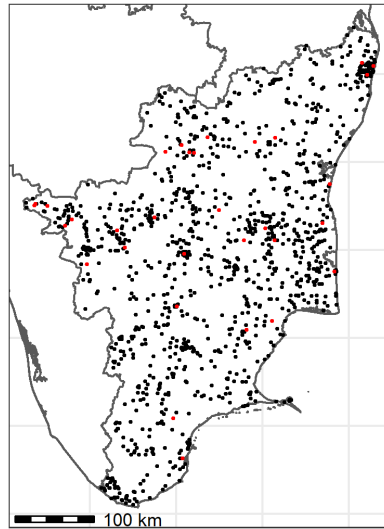

Tanzania

Fever

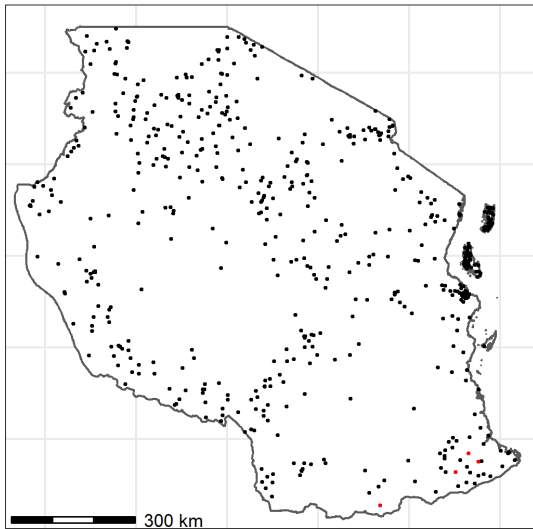

Diarrhoea

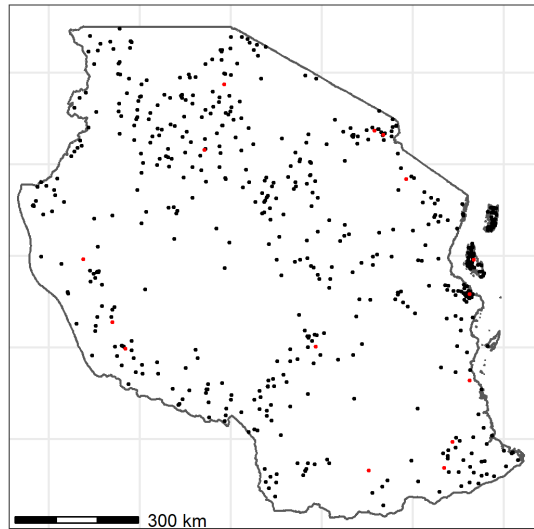

ARI

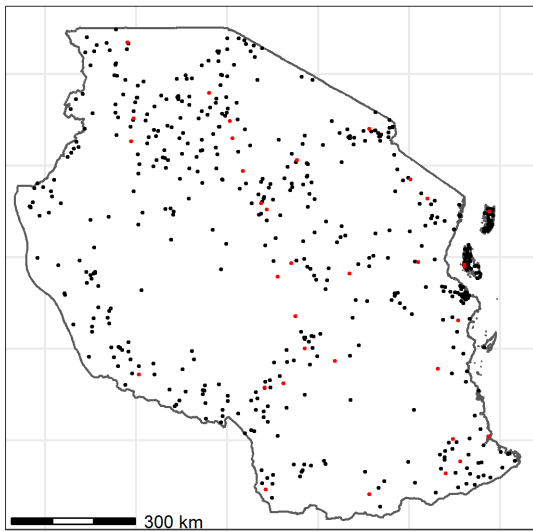

Wasting

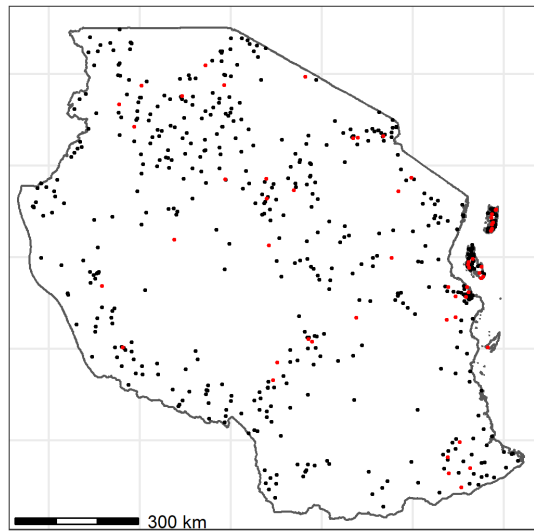

Telangana

Fever

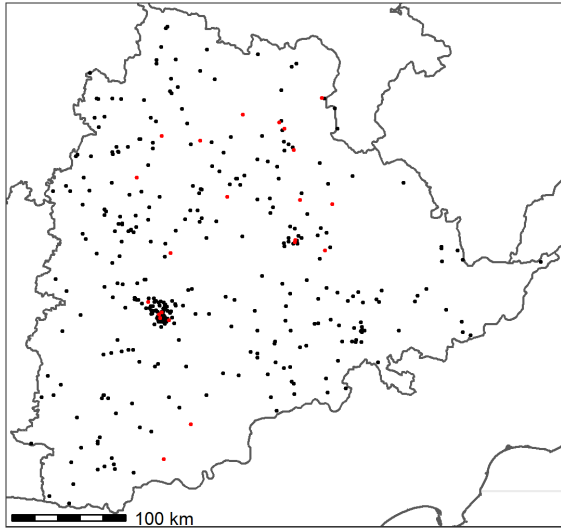

Diarrhoea

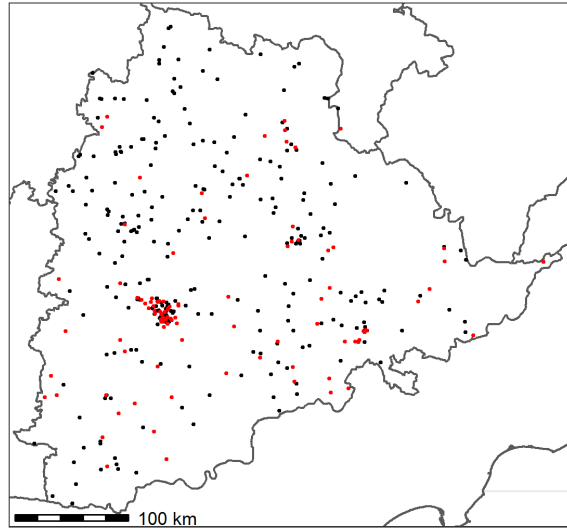

ARI

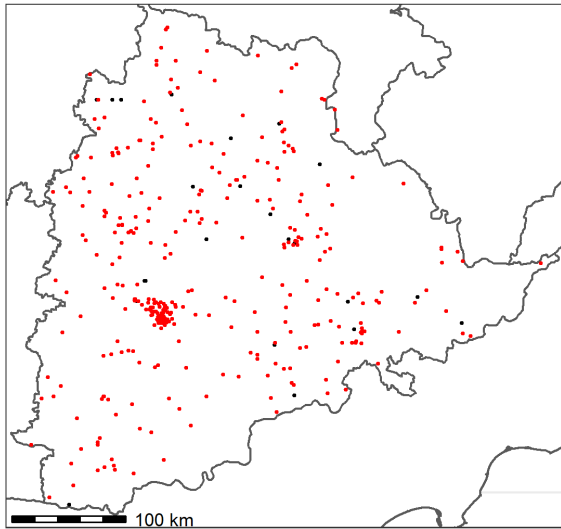

Wasting

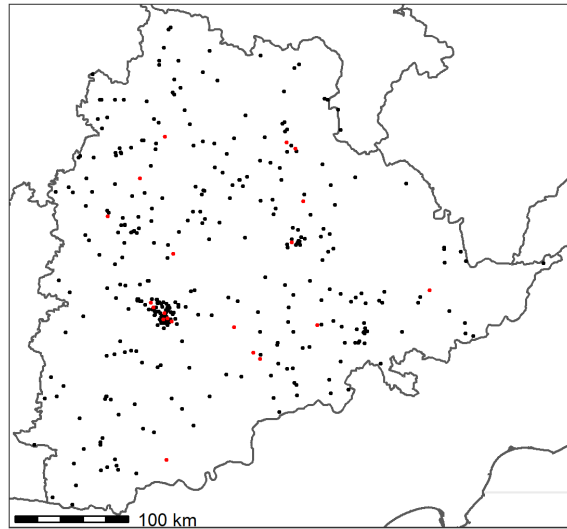



Timor-Leste

Fever

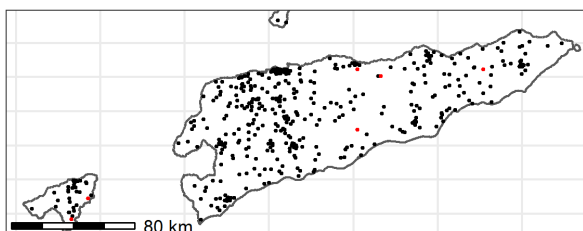

Diarrhoea

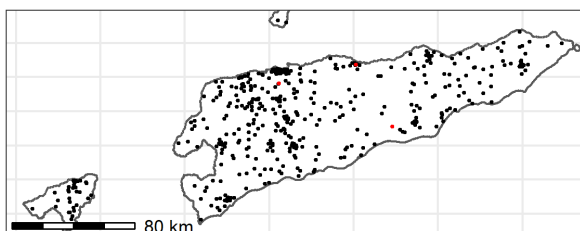

ARI

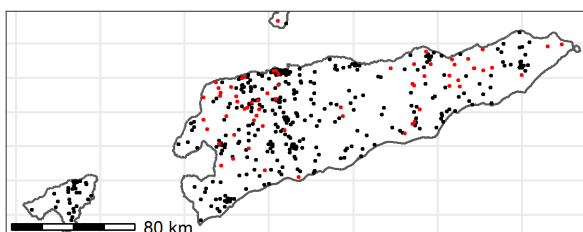

Wasting

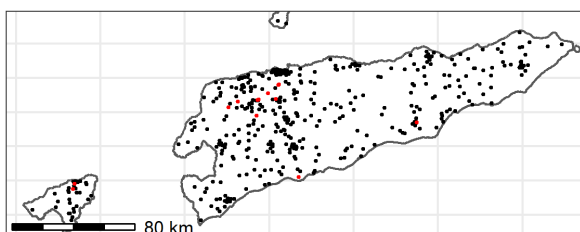

Togo

Fever

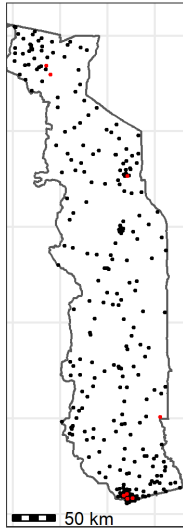

Diarrhoea

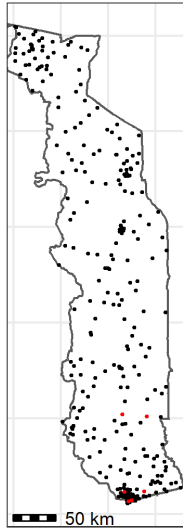

ARI

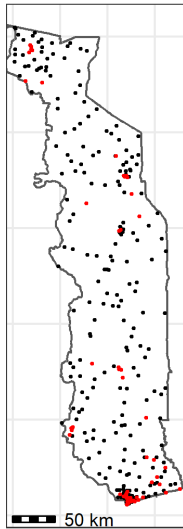

Wasting

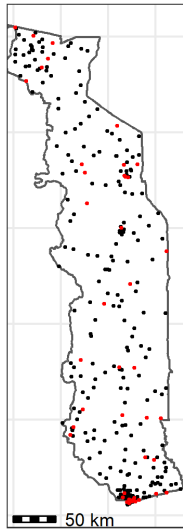

Tripura

Fever

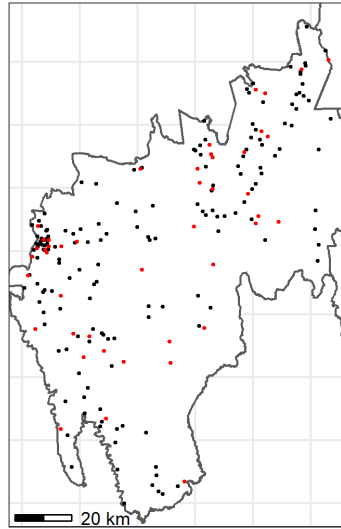

Diarrhoea

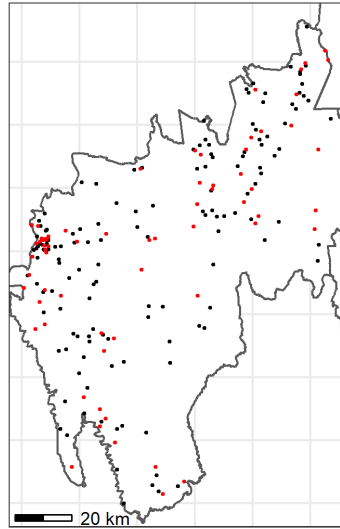

ARI

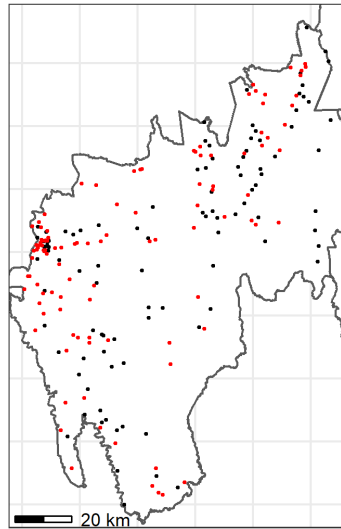

Wasting

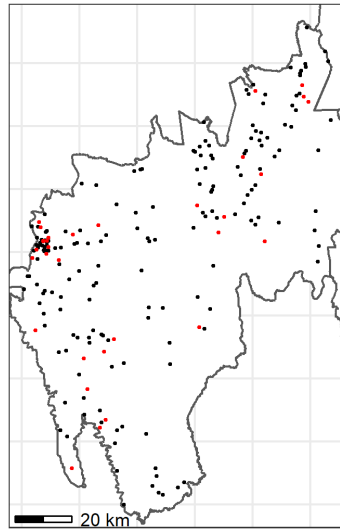

Uganda

Fever

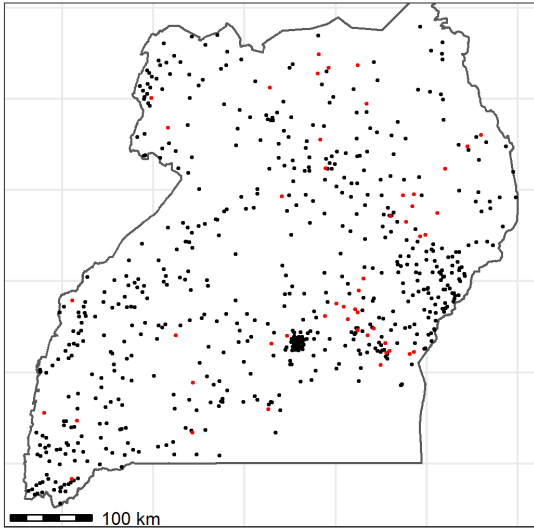

Diarrhoea

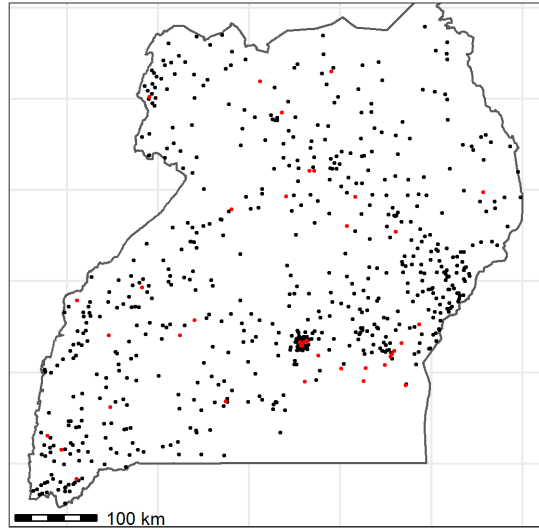

ARI

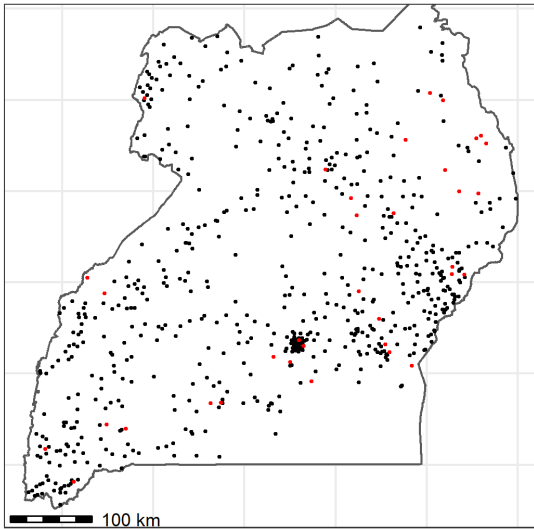

Wasting

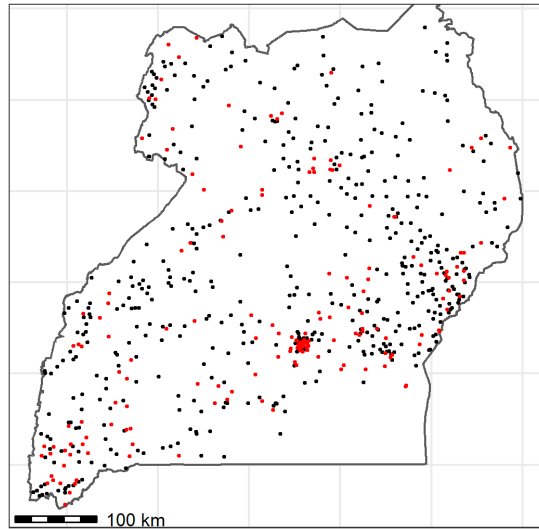

Benin

Fever

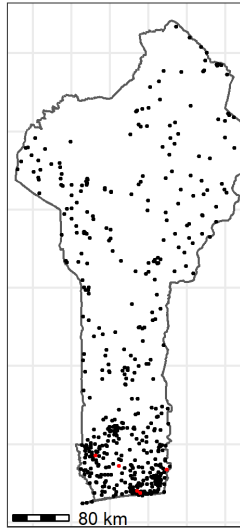

Diarrhoea

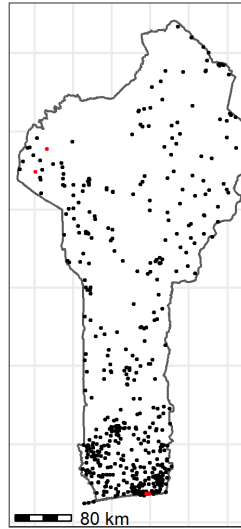

ARI

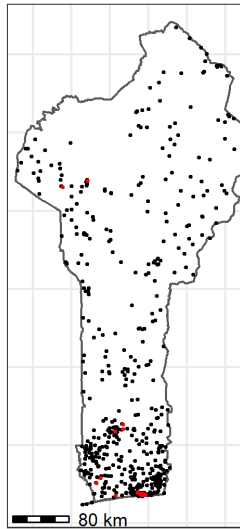

Wasting

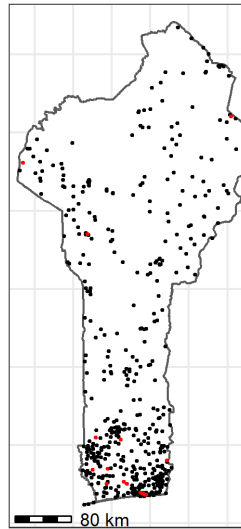

Uttar Pradesh

Fever

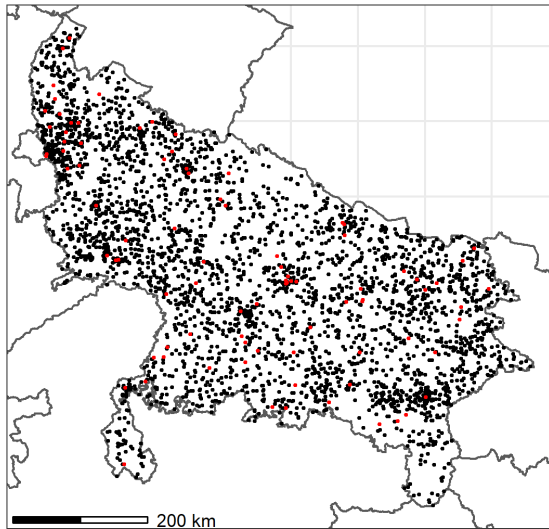

Diarrhoea

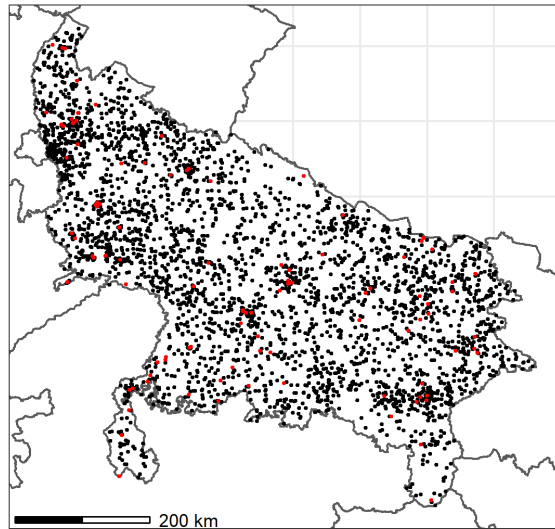

ARI

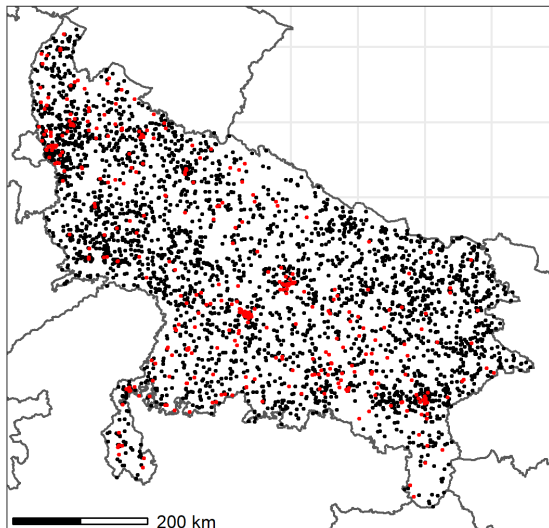

Wasting

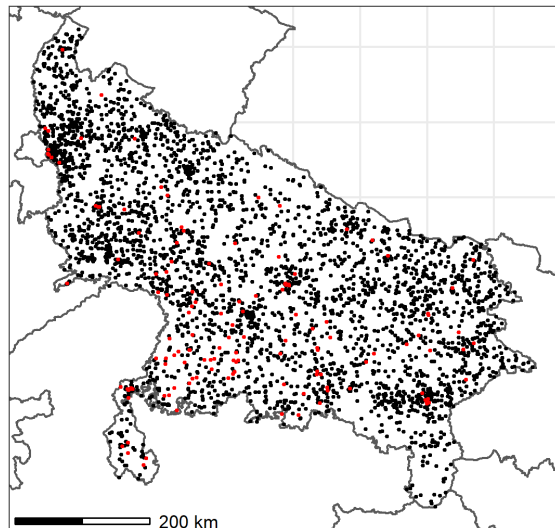

Uttarakhand

Fever

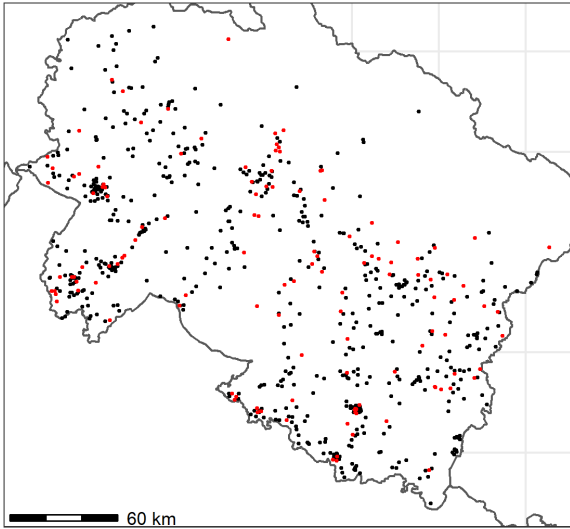

Diarrhoea

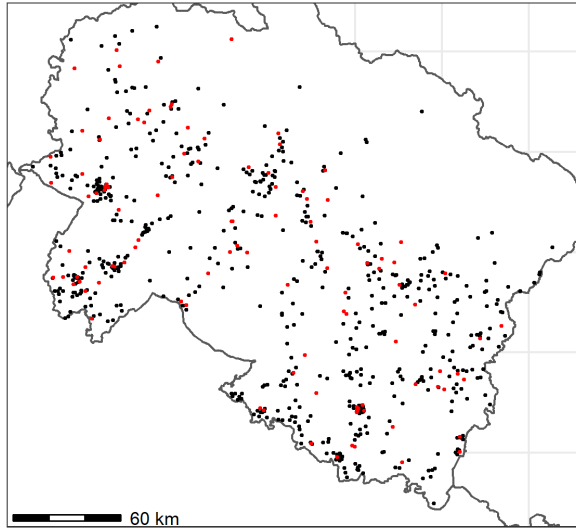

ARI

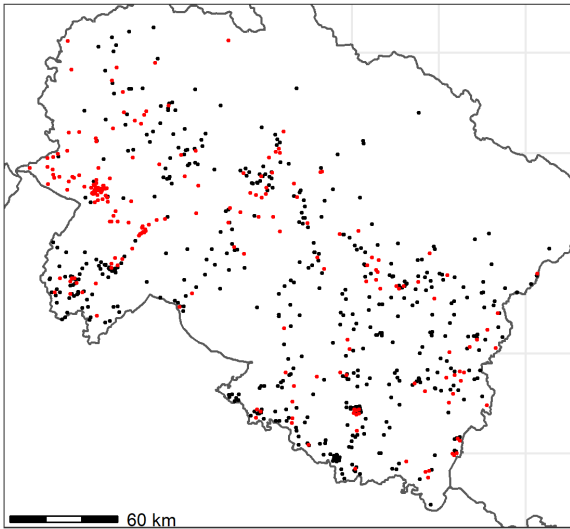

Wasting

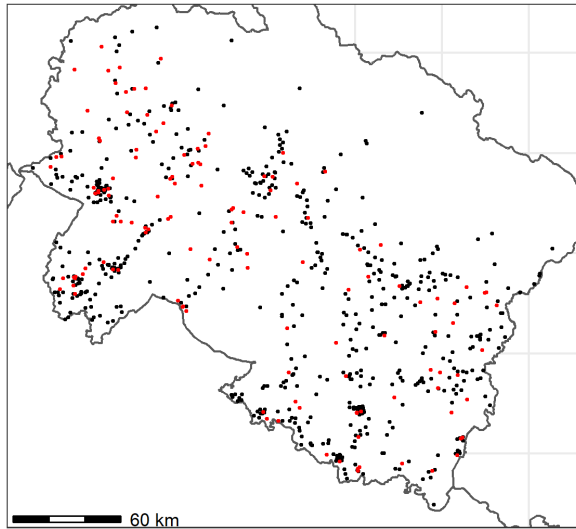

West Bengal

Fever

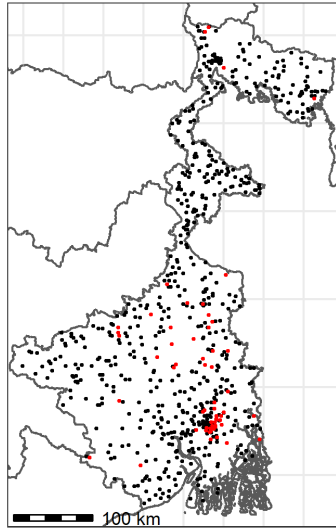

Diarrhoea

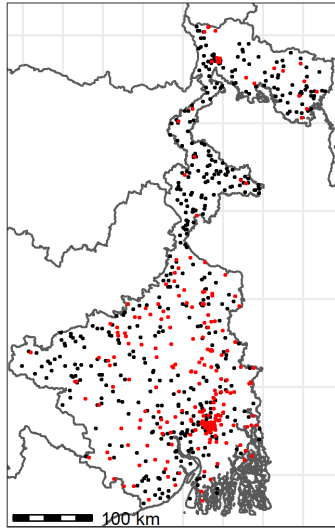

ARI

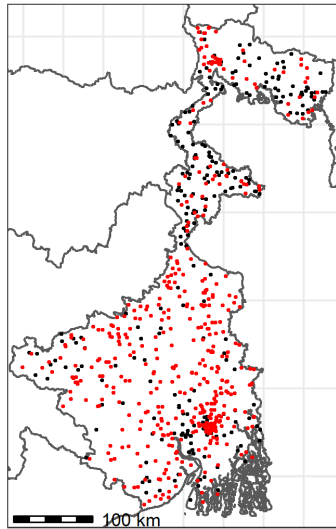

Wasting

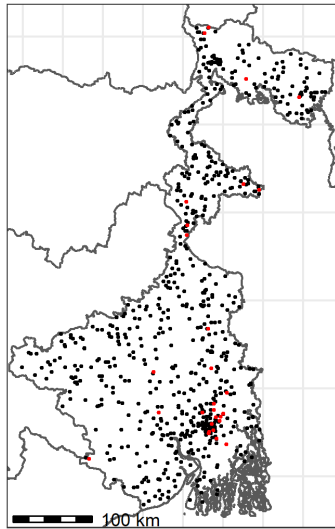



Zambia

Fever

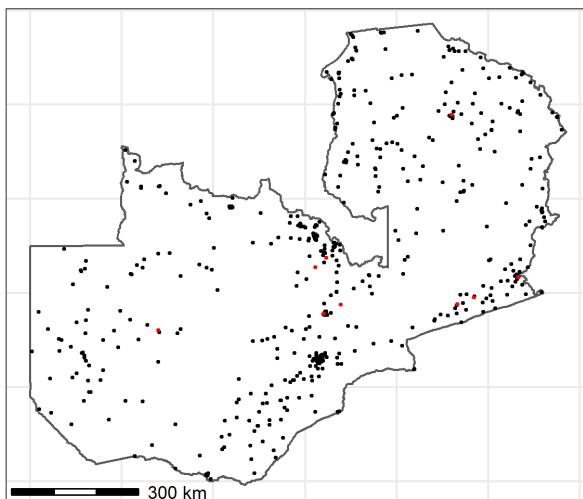

Diarrhoea

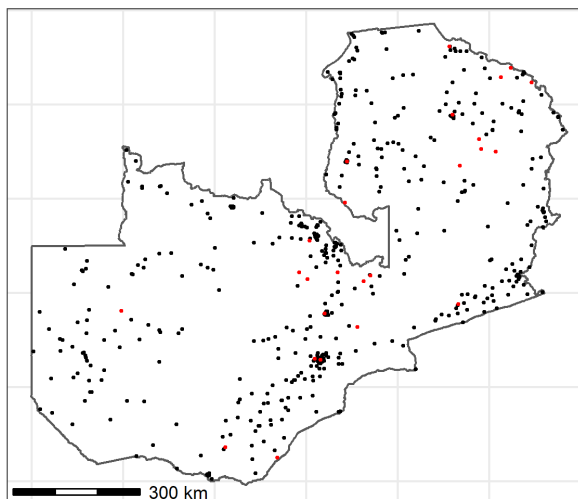

ARI

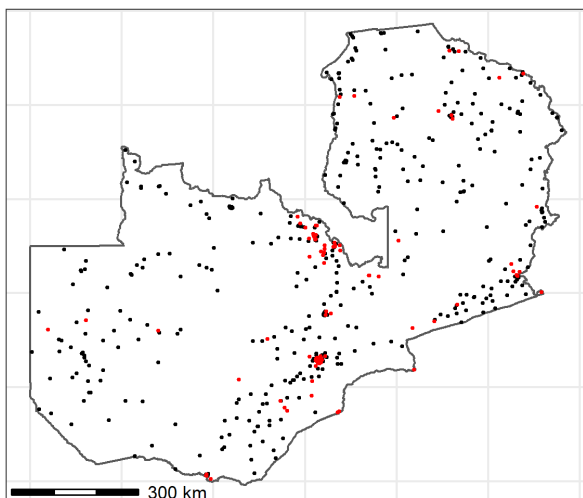

Wasting

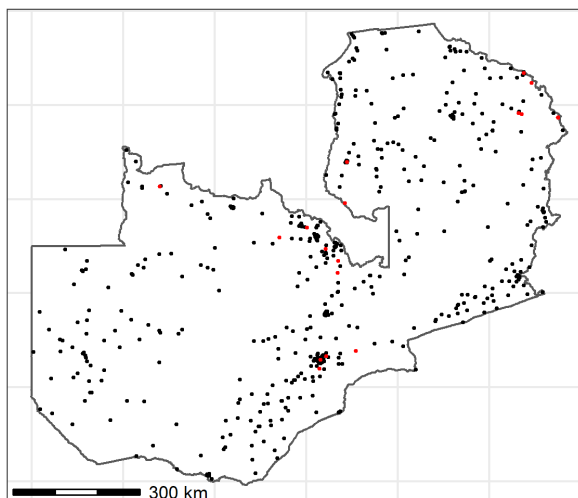

Zimbabwe

Fever

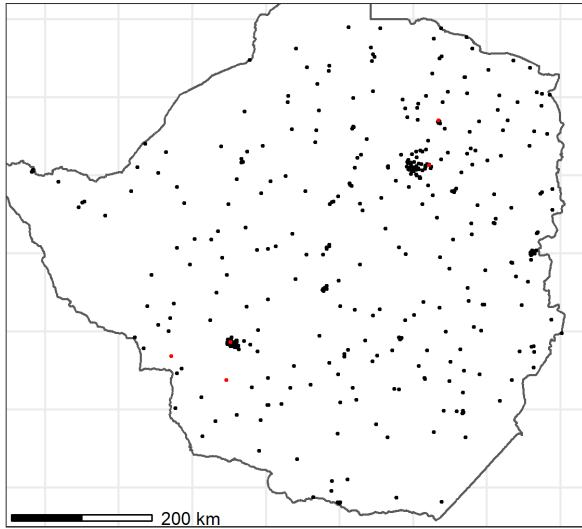

Diarrhoea

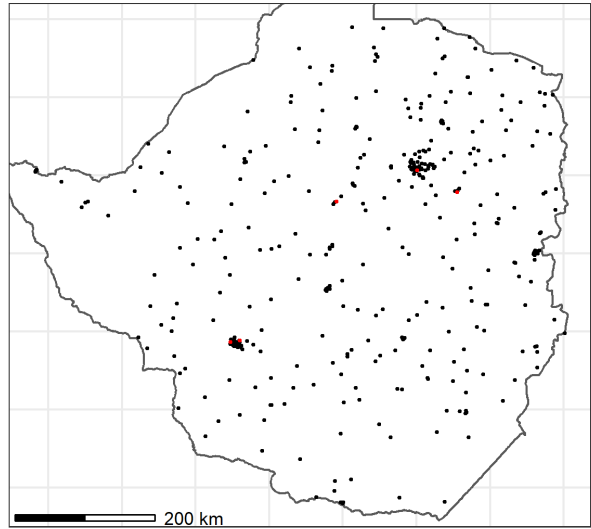

ARI

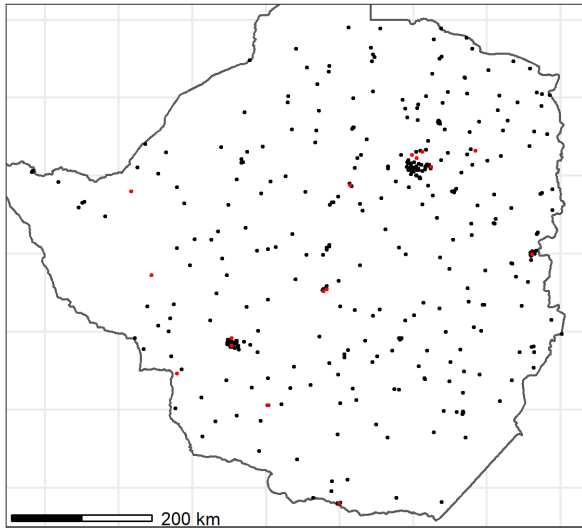

Wasting

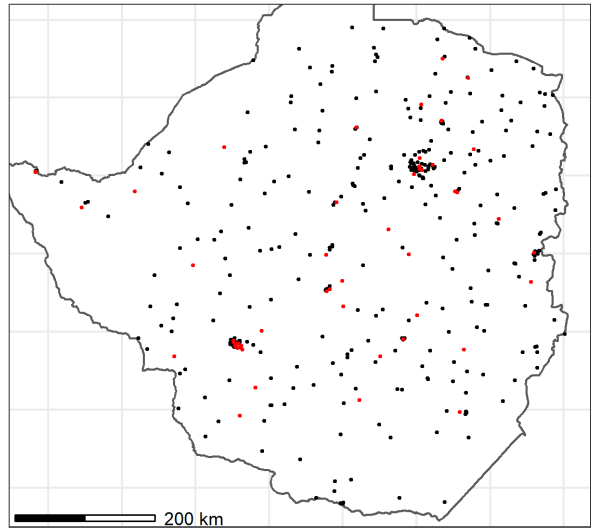

Bihar

Fever

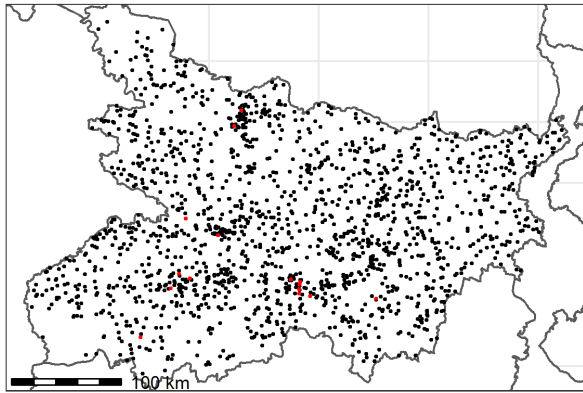

Diarrhoea

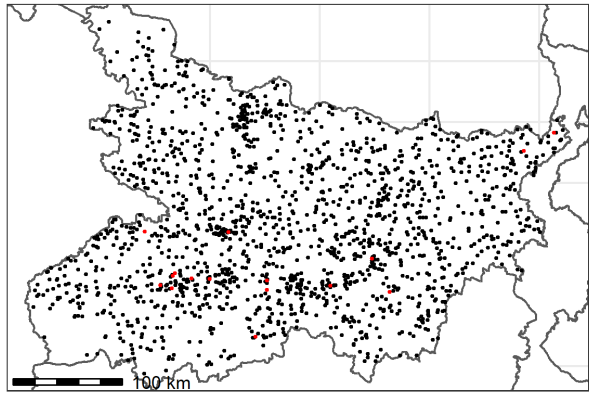

ARI

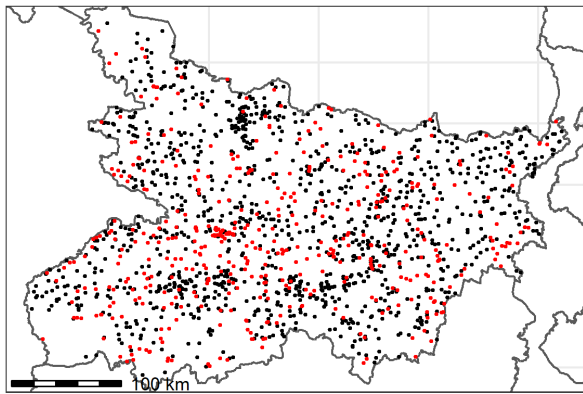

Wasting

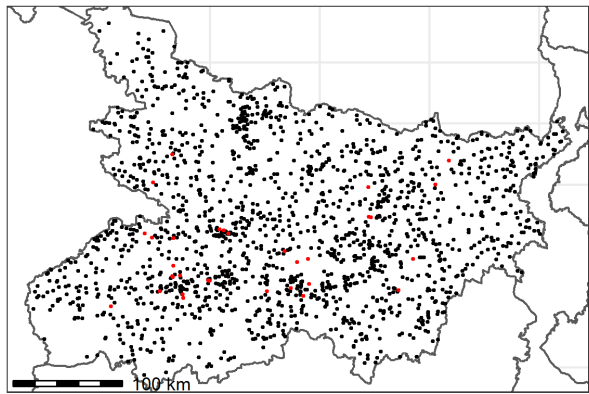

Burkina Faso

Fever

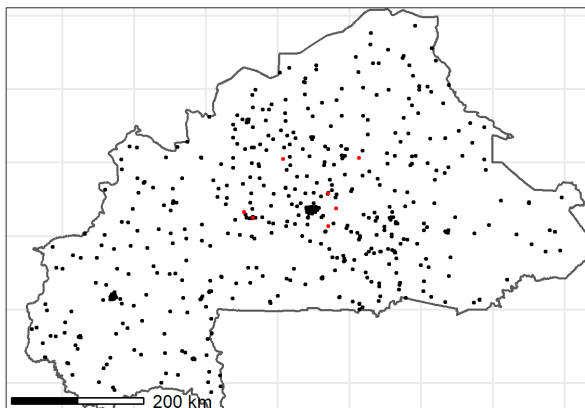

Diarrhoea

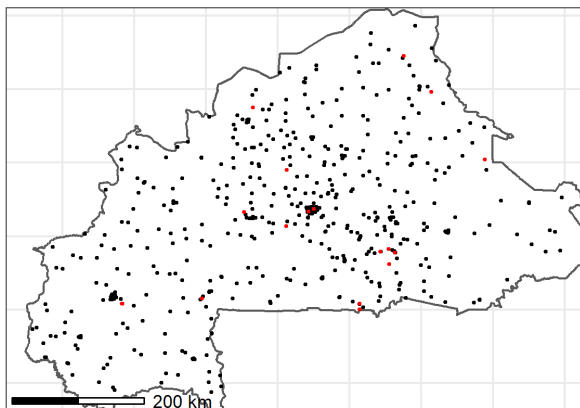

ARI

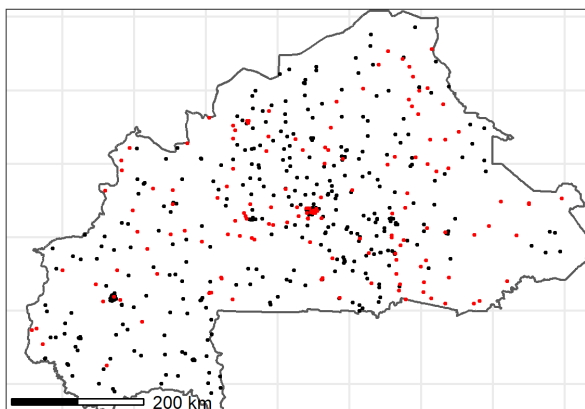

Wasting

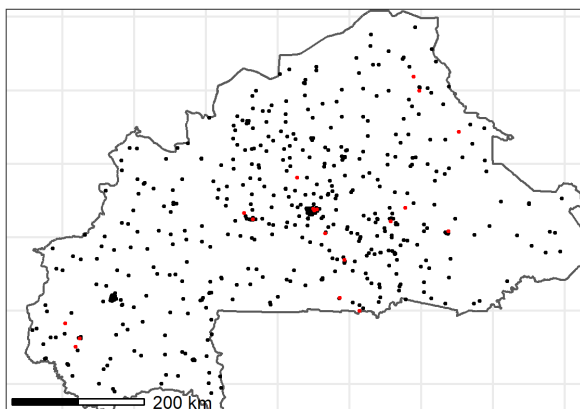

Supplement: MOESM6 [file 19290572]
