# Supplementary material for: Health inequities and clustering of fever, acute respiratory infection, diarrhoea and wasting in children under five in low- and middle-income countries: a Demographic and Health Surveys analysis
Source: Springer Nature journal article supplement (doi:10.1186/s12916-021-02018-0), 2021-06-24
Supplement: MOESM1 [file 19290572]

# Health inequities and clustering of fever, acute respiratory infection, diarrhoea and wasting in children under five in low- and middle-income countries: A Demographic and Health Surveys analysis.

## Supplementary Information: Surveys

[1] “Angola (2015), Bangladesh (2011), Bangladesh (2014), Benin (2012), Benin (2017), Burkina Faso (2010), Burundi (2010), Burundi (2016), Cambodia (2010), Cambodia (2014), Cameroon (2011), Cameroon (2018), Chad (2014), Comoros (2012), Congo (2011), Congo Democratic Republic (2013), Cote d’Ivoire (2012), Egypt (2014), Ethiopia (2011), Ethiopia (2016), Gabon (2012), Gambia (2013), Ghana (2014), Guinea (2012), Guinea (2018), Haiti (2012), Haiti (2016), India (2015), Kenya (2014), Lesotho (2014), Liberia (2013), Malawi (2010), Malawi (2015), Mali (2012), Mali (2018), Mozambique (2011), Myanmar (2016), Namibia (2013), Nepal (2011), Nepal (2016), Niger (2012), Nigeria (2013), Nigeria (2018), Pakistan (2012), Pakistan (2017), Papua New Guinea (2017), Philippines (2013), Philippines (2017), Rwanda (2010), Rwanda (2015), Senegal (2010), Senegal (2012), Senegal (2014), Senegal (2015), Senegal (2016), Senegal (2017), Senegal (2018), Sierra Leone (2013), South Africa (2016), Tanzania (2010), Tanzania (2015), Timor-Leste (2016), Togo (2013), Uganda (2011), Uganda (2016), Zambia (2013), Zambia (2018), Zimbabwe (2010), Zimbabwe (2015),”
