# Supplementary material for: Health inequities and clustering of fever, acute respiratory infection, diarrhoea and wasting in children under five in low- and middle-income countries: a Demographic and Health Surveys analysis
Source: Springer Nature journal article supplement (doi:10.1186/s12916-021-02018-0), 2021-06-24

# Health inequities and clustering of fever, acute respiratory infection, diarrhoea and wasting in children under five in low- and middle-income countries: A Demographic and Health Surveys analysis.

## Supplementary Information: P(2+ conditions | ari, diarrhoea, wasting)

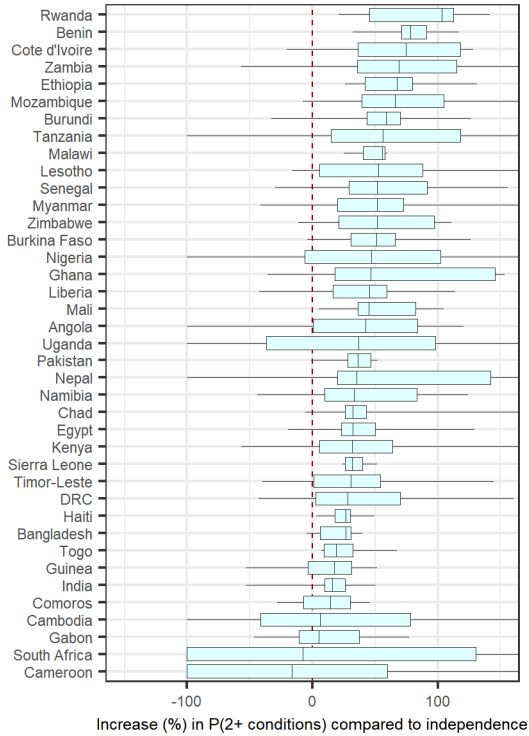

Supplement: MOESM3 [file 19290572]
