# Supplementary material for: Health inequities and clustering of fever, acute respiratory infection, diarrhoea and wasting in children under five in low- and middle-income countries: a Demographic and Health Surveys analysis
Source: Springer Nature journal article supplement (doi:10.1186/s12916-021-02018-0), 2021-06-24
Supplement: MOESM4 [file 19290572]

**Health inequities and clustering of fever, acute respiratory infection, diarrhoea and wasting in children under five in low- and middle-income countries: A Demographic and Health Surveys analysis.**

**Supplementary Information: Model parameter tables**

All fixed effect coefficient estimates are shown in SI: Coefficient\_Tables.

| Name                      | Response | Group             | Level               | Estimate | Error | lci    | uci   |
|---------------------------|----------|-------------------|---------------------|----------|-------|--------|-------|
| Andaman & Nicobar Islands | ari      | Intercept         | -                   | -17.16   | 8.72  | -34.68 | -0.44 |
| Andaman & Nicobar Islands | ari      | Age               | 1-2                 | -1.00    | 3.91  | -8.93  | 6.31  |
| Andaman & Nicobar Islands | ari      | Age               | 2-3                 | 1.18     | 3.81  | -6.53  | 8.43  |
| Andaman & Nicobar Islands | ari      | Age               | 3-4                 | -0.59    | 4.03  | -8.98  | 7.00  |
| Andaman & Nicobar Islands | ari      | Age               | 4-5                 | 1.08     | 3.92  | -6.99  | 8.73  |
| Andaman & Nicobar Islands | ari      | Month             | May                 | -1.80    | 4.05  | -10.03 | 5.81  |
| Andaman & Nicobar Islands | ari      | Month             | June                | -1.08    | 3.98  | -9.17  | 6.62  |
| Andaman & Nicobar Islands | ari      | Month             | July                | 2.01     | 3.87  | -5.57  | 9.62  |
| Andaman & Nicobar Islands | ari      | Wealth            | Poorer              | 0.10     | 4.43  | -8.87  | 8.39  |
| Andaman & Nicobar Islands | ari      | Wealth            | Middle              | -0.58    | 4.30  | -9.12  | 7.68  |
| Andaman & Nicobar Islands | ari      | Wealth            | Richer              | 0.83     | 3.90  | -6.95  | 8.44  |
| Andaman & Nicobar Islands | ari      | Wealth            | Richest             | 0.27     | 4.12  | -7.87  | 8.30  |
| Andaman & Nicobar Islands | ari      | Mothers education | Primary             | -1.10    | 4.61  | -10.37 | 7.69  |
| Andaman & Nicobar Islands | ari      | Mothers education | Secondary           | 0.21     | 3.95  | -7.43  | 8.15  |
| Andaman & Nicobar Islands | ari      | Mothers education | Higher              | 1.01     | 4.19  | -7.08  | 9.32  |
| Andaman & Nicobar Islands | ari      | Mothers age       | 20-30               | 1.09     | 3.89  | -6.53  | 8.94  |
| Andaman & Nicobar Islands | ari      | Mothers age       | 30-40               | -0.28    | 4.07  | -8.38  | 7.49  |
| Andaman & Nicobar Islands | ari      | Sex               | Female              | -0.04    | 3.48  | -6.89  | 6.73  |
| Andaman & Nicobar Islands | ari      | Birth weight      | Average             | -3.20    | 3.50  | -10.03 | 3.73  |
| Andaman & Nicobar Islands | ari      | Birth weight      | Below Average       | -1.14    | 4.40  | -10.07 | 7.11  |
| Andaman & Nicobar Islands | ari      | Breastfed         | No                  | -2.81    | 3.80  | -10.47 | 4.29  |
| Andaman & Nicobar Islands | ari      | Toilet            | Unimproved          | -1.08    | 4.36  | -9.79  | 7.13  |
| Andaman & Nicobar Islands | ari      | Toilet            | Improved            | -0.52    | 4.56  | -9.84  | 8.05  |
| Andaman & Nicobar Islands | ari      | Location          | Urban               | 1.33     | 3.66  | -5.89  | 8.51  |
| Andaman & Nicobar Islands | ari      | Cookign fuel      | Solid               | -1.28    | 3.90  | -9.04  | 6.36  |
| Andaman & Nicobar Islands | ari      | Household size    | 05-Oct              | 3.47     | 3.61  | -3.39  | 10.85 |
| Andaman & Nicobar Islands | ari      | Household size    | 10+                 | -0.42    | 4.54  | -9.64  | 8.20  |
| Andaman & Nicobar Islands | ari      | LLIN              | Yes                 | 0.54     | 3.82  | -7.27  | 7.82  |
| Andaman & Nicobar Islands | ari      | Access            | Significant problem | 0.09     | 4.32  | -8.60  | 8.26  |
| Andaman & Nicobar Islands | ari      | Vaccination       | -                   | -0.01    | 4.88  | -9.60  | 9.57  |

| Name   | Response | Group             | Level               | Estimate | Error | lci   | uci   |
|--------|----------|-------------------|---------------------|----------|-------|-------|-------|
| Angola | dia      | Intercept         | -                   | -2.10    | 0.38  | -2.85 | -1.34 |
| Angola | dia      | Age               | 1-2                 | -0.17    | 0.13  | -0.43 | 0.09  |
| Angola | dia      | Age               | 2-3                 | -0.63    | 0.14  | -0.90 | -0.35 |
| Angola | dia      | Age               | 3-4                 | -1.60    | 0.17  | -1.94 | -1.26 |
| Angola | dia      | Age               | 4-5                 | -1.79    | 0.19  | -2.16 | -1.42 |
| Angola | dia      | Month             | February            | -0.26    | 0.22  | -0.70 | 0.16  |
| Angola | dia      | Month             | March               | -0.76    | 0.35  | -1.45 | -0.09 |
| Angola | dia      | Month             | October             | 0.96     | 0.26  | 0.45  | 1.46  |
| Angola | dia      | Month             | November            | 0.58     | 0.18  | 0.22  | 0.94  |
| Angola | dia      | Month             | December            | 0.08     | 0.20  | -0.31 | 0.46  |
| Angola | dia      | Wealth            | Poorer              | 0.19     | 0.16  | -0.11 | 0.49  |
| Angola | dia      | Wealth            | Middle              | 0.38     | 0.23  | -0.08 | 0.84  |
| Angola | dia      | Wealth            | Richer              | 0.77     | 0.28  | 0.23  | 1.33  |
| Angola | dia      | Wealth            | Richest             | 0.60     | 0.31  | 0.01  | 1.21  |
| Angola | dia      | Mothers education | Primary             | 0.12     | 0.12  | -0.12 | 0.36  |
| Angola | dia      | Mothers education | Secondary           | -0.13    | 0.15  | -0.43 | 0.16  |
| Angola | dia      | Mothers education | Higher              | -1.38    | 0.48  | -2.40 | -0.50 |
| Angola | dia      | Mothers age       | 20-30               | -0.15    | 0.12  | -0.38 | 0.10  |
| Angola | dia      | Mothers age       | 30-40               | -0.23    | 0.15  | -0.52 | 0.06  |
| Angola | dia      | Mothers age       | 40+                 | -0.75    | 0.27  | -1.29 | -0.25 |
| Angola | dia      | Sex               | Female              | -0.31    | 0.09  | -0.49 | -0.13 |
| Angola | dia      | Birth weight      | Average             | 0.11     | 0.11  | -0.09 | 0.32  |
| Angola | dia      | Birth weight      | Below Average       | 0.43     | 0.16  | 0.12  | 0.74  |
| Angola | dia      | Breastfed         | No                  | -0.37    | 0.11  | -0.58 | -0.15 |
| Angola | dia      | Toilet            | Improved            | 0.04     | 0.13  | -0.22 | 0.30  |
| Angola | dia      | Location          | Urban               | -0.10    | 0.19  | -0.48 | 0.27  |
| Angola | dia      | Cookign fuel      | Solid               | 0.53     | 0.17  | 0.19  | 0.87  |
| Angola | dia      | Household size    | 05-Oct              | 0.11     | 0.12  | -0.12 | 0.33  |
| Angola | dia      | Household size    | 10+                 | -0.42    | 0.20  | -0.81 | -0.04 |
| Angola | dia      | LLIN              | Yes                 | 0.06     | 0.11  | -0.15 | 0.28  |
| Angola | dia      | Access            | Significant problem | 0.25     | 0.11  | 0.04  | 0.47  |
| Angola | dia      | Vaccination       | -                   | 0.95     | 0.70  | -0.41 | 2.31  |

| Name | Response | Group             | Level               | Estimate | Error | Ici    | uci  |
|------|----------|-------------------|---------------------|----------|-------|--------|------|
| Goa  | wasted   | Intercept         | -                   | -1.98    | 4.64  | -11.05 | 7.09 |
| Goa  | wasted   | Age               | 1-2                 | 0.22     | 0.98  | -1.64  | 2.22 |
| Goa  | wasted   | Age               | 2-3                 | 0.53     | 1.00  | -1.34  | 2.65 |
| Goa  | wasted   | Age               | 3-4                 | 0.31     | 1.01  | -1.61  | 2.35 |
| Goa  | wasted   | Age               | 4-5                 | -0.90    | 1.09  | -2.99  | 1.29 |
| Goa  | wasted   | Month             | February            | 0.34     | 1.25  | -1.99  | 2.96 |
| Goa  | wasted   | Month             | March               | 3.23     | 2.17  | -0.70  | 7.84 |
| Goa  | wasted   | Month             | April               | 3.64     | 2.27  | -0.56  | 8.30 |
| Goa  | wasted   | Wealth            | Middle              | -2.33    | 1.30  | -5.01  | 0.08 |
| Goa  | wasted   | Wealth            | Richer              | -1.07    | 1.24  | -3.63  | 1.31 |
| Goa  | wasted   | Wealth            | Richest             | -1.15    | 1.34  | -3.81  | 1.46 |
| Goa  | wasted   | Mothers education | Primary             | -0.70    | 1.21  | -3.12  | 1.56 |
| Goa  | wasted   | Mothers education | Secondary           | 0.23     | 0.90  | -1.52  | 2.02 |
| Goa  | wasted   | Mothers education | Higher              | -0.59    | 1.14  | -2.83  | 1.62 |
| Goa  | wasted   | Mothers age       | 20-30               | 0.04     | 1.15  | -2.20  | 2.41 |
| Goa  | wasted   | Mothers age       | 30-40               | -0.00    | 1.24  | -2.39  | 2.50 |
| Goa  | wasted   | Mothers age       | 40+                 | 2.32     | 2.12  | -1.85  | 6.62 |
| Goa  | wasted   | Sex               | Female              | -0.27    | 0.51  | -1.28  | 0.74 |
| Goa  | wasted   | Birth weight      | Average             | -0.53    | 0.56  | -1.63  | 0.60 |
| Goa  | wasted   | Birth weight      | Below Average       | -0.11    | 0.90  | -1.92  | 1.60 |
| Goa  | wasted   | Breastfed         | No                  | 0.81     | 0.58  | -0.32  | 1.95 |
| Goa  | wasted   | Toilet            | Unimproved          | 1.70     | 0.92  | -0.10  | 3.55 |
| Goa  | wasted   | Toilet            | Improved            | -3.04    | 3.49  | -10.71 | 2.55 |
| Goa  | wasted   | Location          | Urban               | -1.65    | 1.96  | -5.96  | 1.78 |
| Goa  | wasted   | Cookign fuel      | Solid               | -1.16    | 1.02  | -3.29  | 0.74 |
| Goa  | wasted   | Household size    | 05-Oct              | 0.20     | 0.54  | -0.87  | 1.24 |
| Goa  | wasted   | Household size    | 10+                 | -0.48    | 1.26  | -3.06  | 1.83 |
| Goa  | wasted   | LLIN              | Yes                 | -1.73    | 2.29  | -6.81  | 2.03 |
| Goa  | wasted   | Access            | Significant problem | -0.75    | 0.88  | -2.57  | 0.88 |
| Goa  | wasted   | Vaccination       | -                   | -0.03    | 5.08  | -9.93  | 9.67 |

| Name   | Response | Group             | Level               | Estimate | Error | lci    | uci  |
|--------|----------|-------------------|---------------------|----------|-------|--------|------|
| Guinea | ari      | Intercept         | -                   | -3.61    | 2.21  | -8.30  | 0.36 |
| Guinea | ari      | Age               | 1-2                 | -0.05    | 0.55  | -1.08  | 1.07 |
| Guinea | ari      | Age               | 2-3                 | -0.07    | 0.56  | -1.12  | 1.04 |
| Guinea | ari      | Age               | 3-4                 | 0.03     | 0.56  | -1.02  | 1.21 |
| Guinea | ari      | Age               | 4-5                 | -1.14    | 0.67  | -2.46  | 0.16 |
| Guinea | ari      | Month             | April               | 0.32     | 1.14  | -1.76  | 2.71 |
| Guinea | ari      | Month             | May                 | 0.71     | 1.14  | -1.39  | 3.11 |
| Guinea | ari      | Month             | June                | -1.23    | 1.90  | -5.33  | 2.21 |
| Guinea | ari      | Wealth            | Poorer              | 0.62     | 0.49  | -0.32  | 1.61 |
| Guinea | ari      | Wealth            | Middle              | 0.19     | 0.55  | -0.87  | 1.26 |
| Guinea | ari      | Wealth            | Richer              | -0.67    | 0.71  | -2.09  | 0.72 |
| Guinea | ari      | Wealth            | Richest             | -1.09    | 0.90  | -2.89  | 0.66 |
| Guinea | ari      | Mothers education | Primary             | 0.06     | 0.50  | -0.96  | 0.99 |
| Guinea | ari      | Mothers education | Secondary           | -0.30    | 0.61  | -1.55  | 0.83 |
| Guinea | ari      | Mothers education | Higher              | -4.08    | 3.15  | -11.25 | 0.69 |
| Guinea | ari      | Mothers age       | 20-30               | -0.33    | 0.40  | -1.09  | 0.46 |
| Guinea | ari      | Mothers age       | 30-40               | -0.45    | 0.47  | -1.35  | 0.46 |
| Guinea | ari      | Mothers age       | 40+                 | -1.07    | 0.84  | -2.85  | 0.41 |
| Guinea | ari      | Sex               | Female              | -0.22    | 0.30  | -0.81  | 0.38 |
| Guinea | ari      | Birth weight      | Average             | -0.35    | 0.36  | -1.07  | 0.36 |
| Guinea | ari      | Birth weight      | Below Average       | -0.35    | 0.54  | -1.47  | 0.63 |
| Guinea | ari      | Breastfed         | No                  | -0.28    | 0.35  | -0.94  | 0.40 |
| Guinea | ari      | Toilet            | Unimproved          | -0.27    | 0.37  | -1.00  | 0.47 |
| Guinea | ari      | Toilet            | Improved            | -0.90    | 0.51  | -1.93  | 0.04 |
| Guinea | ari      | Location          | Urban               | 0.70     | 0.61  | -0.50  | 1.88 |
| Guinea | ari      | Cookign fuel      | Solid               | 0.35     | 1.66  | -2.30  | 4.12 |
| Guinea | ari      | Household size    | 05-Oct              | -0.69    | 0.42  | -1.49  | 0.13 |
| Guinea | ari      | Household size    | 10+                 | 0.22     | 0.46  | -0.66  | 1.15 |
| Guinea | ari      | LLIN              | Yes                 | -0.39    | 0.39  | -1.17  | 0.35 |
| Guinea | ari      | Access            | Significant problem | -0.37    | 0.36  | -1.06  | 0.33 |
| Guinea | ari      | Vaccination       | -                   | -3.55    | 2.69  | -8.90  | 1.67 |

| Name   | Response | Group             | Level               | Estimate | Error | lci   | uci   |
|--------|----------|-------------------|---------------------|----------|-------|-------|-------|
| Guinea | dia      | Intercept         | -                   | -0.60    | 0.82  | -2.24 | 1.02  |
| Guinea | dia      | Age               | 1-2                 | -0.20    | 0.19  | -0.58 | 0.18  |
| Guinea | dia      | Age               | 2-3                 | -0.80    | 0.22  | -1.23 | -0.37 |
| Guinea | dia      | Age               | 3-4                 | -1.00    | 0.22  | -1.44 | -0.56 |
| Guinea | dia      | Age               | 4-5                 | -1.32    | 0.25  | -1.81 | -0.84 |
| Guinea | dia      | Month             | April               | -0.89    | 0.40  | -1.68 | -0.10 |
| Guinea | dia      | Month             | May                 | -0.90    | 0.41  | -1.71 | -0.09 |
| Guinea | dia      | Month             | June                | -1.12    | 0.56  | -2.24 | -0.04 |
| Guinea | dia      | Wealth            | Poorer              | 0.15     | 0.19  | -0.21 | 0.52  |
| Guinea | dia      | Wealth            | Middle              | -0.06    | 0.22  | -0.50 | 0.37  |
| Guinea | dia      | Wealth            | Richer              | 0.41     | 0.28  | -0.14 | 0.96  |
| Guinea | dia      | Wealth            | Richest             | 0.61     | 0.37  | -0.12 | 1.34  |
| Guinea | dia      | Mothers education | Primary             | -0.06    | 0.21  | -0.47 | 0.34  |
| Guinea | dia      | Mothers education | Secondary           | 0.05     | 0.23  | -0.40 | 0.49  |
| Guinea | dia      | Mothers education | Higher              | -0.57    | 0.56  | -1.75 | 0.44  |
| Guinea | dia      | Mothers age       | 20-30               | -0.29    | 0.18  | -0.63 | 0.05  |
| Guinea | dia      | Mothers age       | 30-40               | -0.19    | 0.20  | -0.58 | 0.20  |
| Guinea | dia      | Mothers age       | 40+                 | -0.49    | 0.32  | -1.13 | 0.12  |
| Guinea | dia      | Sex               | Female              | 0.32     | 0.13  | 0.07  | 0.58  |
| Guinea | dia      | Birth weight      | Average             | -0.13    | 0.14  | -0.41 | 0.14  |
| Guinea | dia      | Birth weight      | Below Average       | -0.39    | 0.21  | -0.83 | 0.03  |
| Guinea | dia      | Breastfed         | No                  | -0.53    | 0.15  | -0.84 | -0.22 |
| Guinea | dia      | Toilet            | Unimproved          | 0.45     | 0.17  | 0.11  | 0.79  |
| Guinea | dia      | Toilet            | Improved            | -0.35    | 0.18  | -0.70 | 0.01  |
| Guinea | dia      | Location          | Urban               | -0.41    | 0.28  | -0.95 | 0.15  |
| Guinea | dia      | Cookign fuel      | Solid               | 0.34     | 0.62  | -0.80 | 1.63  |
| Guinea | dia      | Household size    | 05-Oct              | -0.30    | 0.17  | -0.63 | 0.04  |
| Guinea | dia      | Household size    | 10+                 | -0.46    | 0.21  | -0.87 | -0.05 |
| Guinea | dia      | LLIN              | Yes                 | 0.08     | 0.15  | -0.21 | 0.36  |
| Guinea | dia      | Access            | Significant problem | 0.54     | 0.17  | 0.20  | 0.87  |
| Guinea | dia      | Vaccination       | -                   | -2.42    | 1.24  | -4.89 | 0.04  |

| Name   | Response | Group             | Level               | Estimate | Error | lci   | uci   |
|--------|----------|-------------------|---------------------|----------|-------|-------|-------|
| Guinea | fever    | Intercept         | -                   | -1.17    | 0.67  | -2.48 | 0.15  |
| Guinea | fever    | Age               | 1-2                 | 0.25     | 0.19  | -0.11 | 0.62  |
| Guinea | fever    | Age               | 2-3                 | -0.06    | 0.20  | -0.45 | 0.33  |
| Guinea | fever    | Age               | 3-4                 | -0.69    | 0.21  | -1.11 | -0.28 |
| Guinea | fever    | Age               | 4-5                 | -0.59    | 0.22  | -1.02 | -0.15 |
| Guinea | fever    | Month             | April               | 0.10     | 0.36  | -0.59 | 0.81  |
| Guinea | fever    | Month             | May                 | 0.12     | 0.37  | -0.59 | 0.85  |
| Guinea | fever    | Month             | June                | 0.15     | 0.48  | -0.79 | 1.08  |
| Guinea | fever    | Wealth            | Poorer              | 0.14     | 0.17  | -0.18 | 0.47  |
| Guinea | fever    | Wealth            | Middle              | 0.02     | 0.20  | -0.37 | 0.39  |
| Guinea | fever    | Wealth            | Richer              | 0.15     | 0.25  | -0.34 | 0.65  |
| Guinea | fever    | Wealth            | Richest             | 0.48     | 0.32  | -0.14 | 1.12  |
| Guinea | fever    | Mothers education | Primary             | 0.18     | 0.18  | -0.17 | 0.53  |
| Guinea | fever    | Mothers education | Secondary           | -0.10    | 0.20  | -0.51 | 0.29  |
| Guinea | fever    | Mothers education | Higher              | -0.94    | 0.52  | -2.05 | 0.02  |
| Guinea | fever    | Mothers age       | 20-30               | -0.11    | 0.16  | -0.42 | 0.21  |
| Guinea | fever    | Mothers age       | 30-40               | 0.26     | 0.17  | -0.08 | 0.61  |
| Guinea | fever    | Mothers age       | 40+                 | 0.08     | 0.27  | -0.45 | 0.60  |
| Guinea | fever    | Sex               | Female              | -0.14    | 0.11  | -0.35 | 0.08  |
| Guinea | fever    | Birth weight      | Average             | -0.08    | 0.12  | -0.32 | 0.16  |
| Guinea | fever    | Birth weight      | Below Average       | 0.29     | 0.17  | -0.05 | 0.61  |
| Guinea | fever    | Breastfed         | No                  | -0.15    | 0.13  | -0.40 | 0.10  |
| Guinea | fever    | Toilet            | Unimproved          | -0.03    | 0.15  | -0.32 | 0.26  |
| Guinea | fever    | Toilet            | Improved            | -0.24    | 0.16  | -0.56 | 0.07  |
| Guinea | fever    | Location          | Urban               | 0.05     | 0.23  | -0.41 | 0.51  |
| Guinea | fever    | Cookign fuel      | Solid               | -0.26    | 0.48  | -1.15 | 0.71  |
| Guinea | fever    | Household size    | 05-Oct              | -0.28    | 0.15  | -0.58 | 0.03  |
| Guinea | fever    | Household size    | 10+                 | -0.56    | 0.19  | -0.93 | -0.20 |
| Guinea | fever    | LLIN              | Yes                 | 0.01     | 0.13  | -0.24 | 0.26  |
| Guinea | fever    | Access            | Significant problem | 0.61     | 0.14  | 0.33  | 0.89  |
| Guinea | fever    | Vaccination       | -                   | -2.33    | 1.05  | -4.39 | -0.30 |

| Name   | Response | Group             | Level               | Estimate | Error | lci   | uci   |
|--------|----------|-------------------|---------------------|----------|-------|-------|-------|
| Guinea | wasted   | Intercept         | -                   | -2.39    | 0.88  | -4.18 | -0.73 |
| Guinea | wasted   | Age               | 1-2                 | -0.14    | 0.26  | -0.63 | 0.37  |
| Guinea | wasted   | Age               | 2-3                 | -0.04    | 0.27  | -0.57 | 0.48  |
| Guinea | wasted   | Age               | 3-4                 | -0.37    | 0.28  | -0.91 | 0.17  |
| Guinea | wasted   | Age               | 4-5                 | -0.22    | 0.28  | -0.78 | 0.33  |
| Guinea | wasted   | Month             | April               | 0.18     | 0.49  | -0.75 | 1.17  |
| Guinea | wasted   | Month             | May                 | 0.26     | 0.50  | -0.70 | 1.28  |
| Guinea | wasted   | Month             | June                | 0.47     | 0.65  | -0.78 | 1.80  |
| Guinea | wasted   | Wealth            | Poorer              | 0.24     | 0.23  | -0.20 | 0.70  |
| Guinea | wasted   | Wealth            | Middle              | 0.40     | 0.26  | -0.11 | 0.91  |
| Guinea | wasted   | Wealth            | Richer              | 0.07     | 0.34  | -0.59 | 0.73  |
| Guinea | wasted   | Wealth            | Richest             | -0.12    | 0.42  | -0.95 | 0.70  |
| Guinea | wasted   | Mothers education | Primary             | -0.45    | 0.27  | -0.99 | 0.07  |
| Guinea | wasted   | Mothers education | Secondary           | -0.29    | 0.28  | -0.84 | 0.24  |
| Guinea | wasted   | Mothers education | Higher              | -0.07    | 0.56  | -1.22 | 0.96  |
| Guinea | wasted   | Mothers age       | 20-30               | 0.31     | 0.23  | -0.13 | 0.76  |
| Guinea | wasted   | Mothers age       | 30-40               | -0.02    | 0.26  | -0.51 | 0.48  |
| Guinea | wasted   | Mothers age       | 40+                 | 0.10     | 0.37  | -0.64 | 0.83  |
| Guinea | wasted   | Sex               | Female              | -0.00    | 0.14  | -0.30 | 0.29  |
| Guinea | wasted   | Birth weight      | Average             | 0.04     | 0.16  | -0.27 | 0.36  |
| Guinea | wasted   | Birth weight      | Below Average       | 0.30     | 0.23  | -0.16 | 0.76  |
| Guinea | wasted   | Breastfed         | No                  | -0.24    | 0.18  | -0.58 | 0.11  |
| Guinea | wasted   | Toilet            | Unimproved          | 0.11     | 0.20  | -0.27 | 0.50  |
| Guinea | wasted   | Toilet            | Improved            | -0.04    | 0.21  | -0.46 | 0.37  |
| Guinea | wasted   | Location          | Urban               | 0.28     | 0.32  | -0.34 | 0.91  |
| Guinea | wasted   | Cookign fuel      | Solid               | -0.67    | 0.58  | -1.79 | 0.49  |
| Guinea | wasted   | Household size    | 05-Oct              | -0.06    | 0.21  | -0.46 | 0.35  |
| Guinea | wasted   | Household size    | 10+                 | -0.42    | 0.25  | -0.93 | 0.08  |
| Guinea | wasted   | LLIN              | Yes                 | -0.19    | 0.18  | -0.54 | 0.15  |
| Guinea | wasted   | Access            | Significant problem | -0.05    | 0.18  | -0.40 | 0.31  |
| Guinea | wasted   | Vaccination       | -                   | 0.79     | 1.38  | -1.93 | 3.53  |



| Name    | Response | Group             | Level               | Estimate | Error | Ici    | uci   |
|---------|----------|-------------------|---------------------|----------|-------|--------|-------|
| Gujarat | ari      | Intercept         | -                   | -5.79    | 2.48  | -10.59 | -1.02 |
| Gujarat | ari      | Age               | 1-2                 | 0.64     | 0.45  | -0.22  | 1.56  |
| Gujarat | ari      | Age               | 2-3                 | 0.77     | 0.45  | -0.07  | 1.68  |
| Gujarat | ari      | Age               | 3-4                 | 0.29     | 0.45  | -0.56  | 1.19  |
| Gujarat | ari      | Age               | 4-5                 | 0.16     | 0.47  | -0.72  | 1.10  |
| Gujarat | ari      | Month             | March               | -0.23    | 0.52  | -1.24  | 0.79  |
| Gujarat | ari      | Month             | April               | -0.38    | 0.53  | -1.43  | 0.67  |
| Gujarat | ari      | Month             | May                 | -3.90    | 1.04  | -6.16  | -2.12 |
| Gujarat | ari      | Month             | June                | -1.73    | 0.71  | -3.19  | -0.42 |
| Gujarat | ari      | Wealth            | Poorer              | 0.19     | 0.50  | -0.76  | 1.20  |
| Gujarat | ari      | Wealth            | Middle              | 0.19     | 0.56  | -0.88  | 1.34  |
| Gujarat | ari      | Wealth            | Richer              | -0.72    | 0.71  | -2.11  | 0.68  |
| Gujarat | ari      | Wealth            | Richest             | -1.06    | 0.77  | -2.57  | 0.49  |
| Gujarat | ari      | Mothers education | Primary             | -0.28    | 0.48  | -1.26  | 0.62  |
| Gujarat | ari      | Mothers education | Secondary           | 0.46     | 0.37  | -0.25  | 1.19  |
| Gujarat | ari      | Mothers education | Higher              | 1.30     | 0.51  | 0.30   | 2.33  |
| Gujarat | ari      | Mothers age       | 20-30               | -0.02    | 0.44  | -0.84  | 0.88  |
| Gujarat | ari      | Mothers age       | 30-40               | 0.10     | 0.53  | -0.91  | 1.15  |
| Gujarat | ari      | Sex               | Female              | -0.16    | 0.24  | -0.63  | 0.31  |
| Gujarat | ari      | Birth weight      | Average             | 0.02     | 0.28  | -0.51  | 0.58  |
| Gujarat | ari      | Birth weight      | Below Average       | -0.41    | 0.42  | -1.25  | 0.39  |
| Gujarat | ari      | Breastfed         | No                  | 0.02     | 0.25  | -0.47  | 0.51  |
| Gujarat | ari      | Toilet            | Unimproved          | 0.14     | 0.40  | -0.64  | 0.94  |
| Gujarat | ari      | Toilet            | Improved            | 0.42     | 0.53  | -0.63  | 1.43  |
| Gujarat | ari      | Location          | Urban               | 0.42     | 0.49  | -0.54  | 1.39  |
| Gujarat | ari      | Cookign fuel      | Solid               | -0.58    | 0.49  | -1.52  | 0.41  |
| Gujarat | ari      | Household size    | 05-Oct              | -1.04    | 0.29  | -1.61  | -0.49 |
| Gujarat | ari      | Household size    | 10+                 | -0.83    | 0.40  | -1.64  | -0.07 |
| Gujarat | ari      | LLIN              | Yes                 | -2.80    | 1.91  | -7.27  | 0.11  |
| Gujarat | ari      | Access            | Significant problem | 0.66     | 0.27  | 0.14   | 1.18  |
| Gujarat | ari      | Vaccination       | -                   | 0.03     | 5.12  | -9.84  | 10.01 |

| Name    | Response | Group             | Level               | Estimate | Error | lci   | uci   |
|---------|----------|-------------------|---------------------|----------|-------|-------|-------|
| Gujarat | dia      | Intercept         | -                   | -0.89    | 2.18  | -5.07 | 3.37  |
| Gujarat | dia      | Age               | 1-2                 | -0.71    | 0.15  | -0.99 | -0.42 |
| Gujarat | dia      | Age               | 2-3                 | -1.21    | 0.16  | -1.52 | -0.89 |
| Gujarat | dia      | Age               | 3-4                 | -1.86    | 0.17  | -2.19 | -1.52 |
| Gujarat | dia      | Age               | 4-5                 | -2.47    | 0.21  | -2.88 | -2.07 |
| Gujarat | dia      | Month             | March               | -0.29    | 0.24  | -0.75 | 0.17  |
| Gujarat | dia      | Month             | April               | -0.63    | 0.24  | -1.10 | -0.15 |
| Gujarat | dia      | Month             | May                 | -0.76    | 0.25  | -1.24 | -0.28 |
| Gujarat | dia      | Month             | June                | -0.96    | 0.28  | -1.50 | -0.42 |
| Gujarat | dia      | Wealth            | Poorer              | -0.38    | 0.20  | -0.77 | 0.03  |
| Gujarat | dia      | Wealth            | Middle              | -0.41    | 0.23  | -0.86 | 0.03  |
| Gujarat | dia      | Wealth            | Richer              | -0.39    | 0.29  | -0.95 | 0.16  |
| Gujarat | dia      | Wealth            | Richest             | -0.73    | 0.34  | -1.41 | -0.07 |
| Gujarat | dia      | Mothers education | Primary             | 0.67     | 0.17  | 0.32  | 1.01  |
| Gujarat | dia      | Mothers education | Secondary           | 0.20     | 0.15  | -0.10 | 0.50  |
| Gujarat | dia      | Mothers education | Higher              | -0.74    | 0.29  | -1.32 | -0.18 |
| Gujarat | dia      | Mothers age       | 20-30               | -0.09    | 0.18  | -0.43 | 0.28  |
| Gujarat | dia      | Mothers age       | 30-40               | 0.01     | 0.22  | -0.42 | 0.44  |
| Gujarat | dia      | Sex               | Female              | -0.18    | 0.10  | -0.38 | 0.02  |
| Gujarat | dia      | Birth weight      | Average             | -0.04    | 0.13  | -0.28 | 0.22  |
| Gujarat | dia      | Birth weight      | Below Average       | -0.24    | 0.18  | -0.60 | 0.10  |
| Gujarat | dia      | Breastfed         | No                  | 0.04     | 0.12  | -0.19 | 0.27  |
| Gujarat | dia      | Toilet            | Unimproved          | -0.58    | 0.17  | -0.92 | -0.26 |
| Gujarat | dia      | Toilet            | Improved            | -0.10    | 0.25  | -0.60 | 0.40  |
| Gujarat | dia      | Location          | Urban               | -0.15    | 0.20  | -0.53 | 0.23  |
| Gujarat | dia      | Cookign fuel      | Solid               | 0.07     | 0.19  | -0.30 | 0.46  |
| Gujarat | dia      | Household size    | 05-Oct              | -0.06    | 0.14  | -0.34 | 0.21  |
| Gujarat | dia      | Household size    | 10+                 | 0.13     | 0.19  | -0.24 | 0.49  |
| Gujarat | dia      | LLIN              | Yes                 | -1.19    | 0.68  | -2.64 | 0.01  |
| Gujarat | dia      | Access            | Significant problem | 0.30     | 0.12  | 0.07  | 0.53  |
| Gujarat | dia      | Vaccination       | -                   | 0.04     | 4.94  | -9.46 | 9.57  |

| Name    | Response | Group             | Level               | Estimate | Error | lci   | uci   |
|---------|----------|-------------------|---------------------|----------|-------|-------|-------|
| Gujarat | fever    | Intercept         | -                   | -2.97    | 2.22  | -7.35 | 1.40  |
| Gujarat | fever    | Age               | 1-2                 | 0.34     | 0.16  | 0.02  | 0.66  |
| Gujarat | fever    | Age               | 2-3                 | -0.41    | 0.18  | -0.76 | -0.05 |
| Gujarat | fever    | Age               | 3-4                 | -0.60    | 0.17  | -0.93 | -0.26 |
| Gujarat | fever    | Age               | 4-5                 | -0.59    | 0.18  | -0.95 | -0.23 |
| Gujarat | fever    | Month             | March               | -0.46    | 0.24  | -0.94 | 0.01  |
| Gujarat | fever    | Month             | April               | -0.59    | 0.25  | -1.07 | -0.09 |
| Gujarat | fever    | Month             | May                 | -1.23    | 0.27  | -1.76 | -0.72 |
| Gujarat | fever    | Month             | June                | -1.47    | 0.30  | -2.06 | -0.89 |
| Gujarat | fever    | Wealth            | Poorer              | 0.05     | 0.21  | -0.36 | 0.46  |
| Gujarat | fever    | Wealth            | Middle              | 0.01     | 0.23  | -0.45 | 0.47  |
| Gujarat | fever    | Wealth            | Richer              | 0.53     | 0.28  | -0.03 | 1.08  |
| Gujarat | fever    | Wealth            | Richest             | 0.29     | 0.33  | -0.35 | 0.94  |
| Gujarat | fever    | Mothers education | Primary             | 0.56     | 0.18  | 0.22  | 0.90  |
| Gujarat | fever    | Mothers education | Secondary           | 0.31     | 0.16  | 0.01  | 0.63  |
| Gujarat | fever    | Mothers education | Higher              | -0.27    | 0.25  | -0.77 | 0.23  |
| Gujarat | fever    | Mothers age       | 20-30               | 0.29     | 0.19  | -0.06 | 0.66  |
| Gujarat | fever    | Mothers age       | 30-40               | 0.30     | 0.22  | -0.14 | 0.74  |
| Gujarat | fever    | Sex               | Female              | -0.05    | 0.10  | -0.25 | 0.15  |
| Gujarat | fever    | Birth weight      | Average             | 0.47     | 0.13  | 0.22  | 0.72  |
| Gujarat | fever    | Birth weight      | Below Average       | 0.39     | 0.17  | 0.04  | 0.73  |
| Gujarat | fever    | Breastfed         | No                  | -0.31    | 0.11  | -0.53 | -0.09 |
| Gujarat | fever    | Toilet            | Unimproved          | -0.28    | 0.16  | -0.60 | 0.03  |
| Gujarat | fever    | Toilet            | Improved            | 0.55     | 0.24  | 0.09  | 1.02  |
| Gujarat | fever    | Location          | Urban               | -0.25    | 0.20  | -0.65 | 0.14  |
| Gujarat | fever    | Cookign fuel      | Solid               | 0.21     | 0.19  | -0.15 | 0.57  |
| Gujarat | fever    | Household size    | 05-Oct              | -0.28    | 0.13  | -0.54 | -0.02 |
| Gujarat | fever    | Household size    | 10+                 | -0.03    | 0.18  | -0.39 | 0.32  |
| Gujarat | fever    | LLIN              | Yes                 | -0.56    | 0.57  | -1.75 | 0.47  |
| Gujarat | fever    | Access            | Significant problem | 0.13     | 0.12  | -0.10 | 0.36  |
| Gujarat | fever    | Vaccination       | -                   | -0.01    | 5.06  | -9.89 | 9.83  |

| Name    | Response | Group             | Level               | Estimate | Error | lci   | uci   |
|---------|----------|-------------------|---------------------|----------|-------|-------|-------|
| Gujarat | wasted   | Intercept         | -                   | -0.55    | 2.19  | -4.85 | 3.67  |
| Gujarat | wasted   | Age               | 1-2                 | -0.40    | 0.11  | -0.62 | -0.18 |
| Gujarat | wasted   | Age               | 2-3                 | -0.50    | 0.11  | -0.72 | -0.28 |
| Gujarat | wasted   | Age               | 3-4                 | -0.47    | 0.11  | -0.68 | -0.25 |
| Gujarat | wasted   | Age               | 4-5                 | -0.78    | 0.12  | -1.00 | -0.55 |
| Gujarat | wasted   | Month             | March               | 0.30     | 0.16  | -0.03 | 0.62  |
| Gujarat | wasted   | Month             | April               | 0.19     | 0.17  | -0.13 | 0.51  |
| Gujarat | wasted   | Month             | May                 | 0.27     | 0.16  | -0.05 | 0.58  |
| Gujarat | wasted   | Month             | June                | 0.39     | 0.18  | 0.04  | 0.74  |
| Gujarat | wasted   | Wealth            | Poorer              | 0.10     | 0.13  | -0.14 | 0.35  |
| Gujarat | wasted   | Wealth            | Middle              | -0.13    | 0.14  | -0.40 | 0.14  |
| Gujarat | wasted   | Wealth            | Richer              | -0.30    | 0.18  | -0.64 | 0.04  |
| Gujarat | wasted   | Wealth            | Richest             | -0.27    | 0.20  | -0.66 | 0.13  |
| Gujarat | wasted   | Mothers education | Primary             | -0.03    | 0.11  | -0.24 | 0.18  |
| Gujarat | wasted   | Mothers education | Secondary           | -0.10    | 0.09  | -0.28 | 0.08  |
| Gujarat | wasted   | Mothers education | Higher              | -0.07    | 0.15  | -0.37 | 0.22  |
| Gujarat | wasted   | Mothers age       | 20-30               | -0.10    | 0.12  | -0.33 | 0.12  |
| Gujarat | wasted   | Mothers age       | 30-40               | -0.23    | 0.14  | -0.50 | 0.04  |
| Gujarat | wasted   | Sex               | Female              | -0.18    | 0.06  | -0.30 | -0.06 |
| Gujarat | wasted   | Birth weight      | Average             | 0.15     | 0.08  | -0.01 | 0.30  |
| Gujarat | wasted   | Birth weight      | Below Average       | 0.48     | 0.11  | 0.27  | 0.69  |
| Gujarat | wasted   | Breastfed         | No                  | -0.05    | 0.07  | -0.19 | 0.10  |
| Gujarat | wasted   | Toilet            | Unimproved          | -0.03    | 0.10  | -0.23 | 0.17  |
| Gujarat | wasted   | Toilet            | Improved            | -0.08    | 0.16  | -0.40 | 0.24  |
| Gujarat | wasted   | Location          | Urban               | -0.32    | 0.12  | -0.56 | -0.09 |
| Gujarat | wasted   | Cookign fuel      | Solid               | -0.06    | 0.12  | -0.29 | 0.16  |
| Gujarat | wasted   | Household size    | 05-Oct              | -0.06    | 0.08  | -0.21 | 0.10  |
| Gujarat | wasted   | Household size    | 10+                 | -0.30    | 0.12  | -0.54 | -0.07 |
| Gujarat | wasted   | LLIN              | Yes                 | 0.15     | 0.29  | -0.44 | 0.69  |
| Gujarat | wasted   | Access            | Significant problem | -0.09    | 0.07  | -0.23 | 0.05  |
| Gujarat | wasted   | Vaccination       | -                   | 0.06     | 5.01  | -9.67 | 9.97  |

| Name  | Response | Group             | Level               | Estimate | Error | lci   | uci   |
|-------|----------|-------------------|---------------------|----------|-------|-------|-------|
| Haiti | ari      | Intercept         | -                   | -2.99    | 0.63  | -4.23 | -1.77 |
| Haiti | ari      | Age               | 1-2                 | -0.01    | 0.18  | -0.37 | 0.36  |
| Haiti | ari      | Age               | 2-3                 | 0.09     | 0.18  | -0.26 | 0.46  |
| Haiti | ari      | Age               | 3-4                 | -0.05    | 0.19  | -0.42 | 0.33  |
| Haiti | ari      | Age               | 4-5                 | -0.09    | 0.19  | -0.46 | 0.30  |
| Haiti | ari      | Month             | February            | 0.00     | 0.23  | -0.47 | 0.46  |
| Haiti | ari      | Month             | March               | -0.12    | 0.21  | -0.53 | 0.29  |
| Haiti | ari      | Month             | April               | 0.35     | 0.26  | -0.17 | 0.86  |
| Haiti | ari      | Month             | December            | 0.44     | 0.21  | 0.03  | 0.85  |
| Haiti | ari      | Wealth            | Poorer              | -0.01    | 0.16  | -0.33 | 0.30  |
| Haiti | ari      | Wealth            | Middle              | -0.15    | 0.20  | -0.54 | 0.24  |
| Haiti | ari      | Wealth            | Richer              | 0.01     | 0.24  | -0.46 | 0.48  |
| Haiti | ari      | Wealth            | Richest             | 0.09     | 0.28  | -0.47 | 0.65  |
| Haiti | ari      | Mothers education | Primary             | 0.60     | 0.16  | 0.29  | 0.91  |
| Haiti | ari      | Mothers education | Secondary           | 0.34     | 0.19  | -0.02 | 0.71  |
| Haiti | ari      | Mothers education | Higher              | 0.73     | 0.33  | 0.09  | 1.35  |
| Haiti | ari      | Mothers age       | 20-30               | 0.02     | 0.18  | -0.33 | 0.37  |
| Haiti | ari      | Mothers age       | 30-40               | 0.11     | 0.19  | -0.26 | 0.48  |
| Haiti | ari      | Mothers age       | 40+                 | 0.66     | 0.25  | 0.17  | 1.14  |
| Haiti | ari      | Sex               | Female              | -0.09    | 0.10  | -0.29 | 0.12  |
| Haiti | ari      | Birth weight      | Average             | -0.05    | 0.13  | -0.30 | 0.21  |
| Haiti | ari      | Birth weight      | Below Average       | 0.42     | 0.14  | 0.14  | 0.70  |
| Haiti | ari      | Breastfed         | No                  | -0.13    | 0.11  | -0.36 | 0.09  |
| Haiti | ari      | Toilet            | Unimproved          | -0.13    | 0.14  | -0.40 | 0.14  |
| Haiti | ari      | Location          | Urban               | -0.27    | 0.20  | -0.67 | 0.11  |
| Haiti | ari      | Cookign fuel      | Solid               | 0.40     | 0.35  | -0.26 | 1.12  |
| Haiti | ari      | Household size    | 05-Oct              | 0.17     | 0.12  | -0.07 | 0.40  |
| Haiti | ari      | Household size    | 10+                 | 0.13     | 0.21  | -0.28 | 0.53  |
| Haiti | ari      | LLIN              | Yes                 | -0.00    | 0.14  | -0.28 | 0.27  |
| Haiti | ari      | Access            | Significant problem | -0.09    | 0.14  | -0.36 | 0.19  |
| Haiti | ari      | Vaccination       | -                   | -0.76    | 0.94  | -2.61 | 1.10  |

| Name   | Response | Group             | Level               | Estimate | Error | lci   | uci   |
|--------|----------|-------------------|---------------------|----------|-------|-------|-------|
| Angola | fever    | Intercept         | -                   | -1.61    | 0.37  | -2.35 | -0.88 |
| Angola | fever    | Age               | 1-2                 | -0.08    | 0.14  | -0.35 | 0.21  |
| Angola | fever    | Age               | 2-3                 | -0.28    | 0.15  | -0.58 | 0.02  |
| Angola | fever    | Age               | 3-4                 | -0.50    | 0.16  | -0.80 | -0.17 |
| Angola | fever    | Age               | 4-5                 | -0.67    | 0.17  | -1.01 | -0.35 |
| Angola | fever    | Month             | February            | -0.49    | 0.21  | -0.90 | -0.07 |
| Angola | fever    | Month             | March               | -1.17    | 0.36  | -1.89 | -0.49 |
| Angola | fever    | Month             | October             | 0.15     | 0.26  | -0.36 | 0.67  |
| Angola | fever    | Month             | November            | 0.02     | 0.18  | -0.33 | 0.38  |
| Angola | fever    | Month             | December            | -0.33    | 0.19  | -0.70 | 0.04  |
| Angola | fever    | Wealth            | Poorer              | -0.05    | 0.15  | -0.34 | 0.24  |
| Angola | fever    | Wealth            | Middle              | -0.43    | 0.23  | -0.87 | 0.01  |
| Angola | fever    | Wealth            | Richer              | -0.31    | 0.28  | -0.87 | 0.24  |
| Angola | fever    | Wealth            | Richest             | -0.75    | 0.31  | -1.37 | -0.15 |
| Angola | fever    | Mothers education | Primary             | 0.22     | 0.12  | -0.01 | 0.45  |
| Angola | fever    | Mothers education | Secondary           | 0.28     | 0.15  | -0.02 | 0.59  |
| Angola | fever    | Mothers education | Higher              | -0.21    | 0.39  | -0.99 | 0.53  |
| Angola | fever    | Mothers age       | 20-30               | -0.10    | 0.12  | -0.34 | 0.14  |
| Angola | fever    | Mothers age       | 30-40               | -0.07    | 0.15  | -0.36 | 0.21  |
| Angola | fever    | Mothers age       | 40+                 | 0.47     | 0.22  | 0.05  | 0.89  |
| Angola | fever    | Sex               | Female              | 0.02     | 0.09  | -0.15 | 0.19  |
| Angola | fever    | Birth weight      | Average             | 0.07     | 0.10  | -0.13 | 0.27  |
| Angola | fever    | Birth weight      | Below Average       | 0.31     | 0.16  | 0.01  | 0.61  |
| Angola | fever    | Breastfed         | No                  | -0.13    | 0.10  | -0.34 | 0.07  |
| Angola | fever    | Toilet            | Improved            | 0.09     | 0.13  | -0.17 | 0.34  |
| Angola | fever    | Location          | Urban               | 0.03     | 0.19  | -0.32 | 0.41  |
| Angola | fever    | Cookign fuel      | Solid               | 0.10     | 0.18  | -0.25 | 0.46  |
| Angola | fever    | Household size    | 05-Oct              | -0.09    | 0.11  | -0.30 | 0.13  |
| Angola | fever    | Household size    | 10+                 | -0.52    | 0.19  | -0.90 | -0.15 |
| Angola | fever    | LLIN              | Yes                 | -0.14    | 0.11  | -0.36 | 0.08  |
| Angola | fever    | Access            | Significant problem | 0.12     | 0.11  | -0.09 | 0.33  |
| Angola | fever    | Vaccination       | -                   | 0.89     | 0.70  | -0.43 | 2.29  |

| Name  | Response | Group             | Level               | Estimate | Error | lci   | uci   |
|-------|----------|-------------------|---------------------|----------|-------|-------|-------|
| Haiti | dia      | Intercept         | -                   | -1.37    | 0.50  | -2.37 | -0.43 |
| Haiti | dia      | Age               | 1-2                 | -0.25    | 0.12  | -0.49 | -0.02 |
| Haiti | dia      | Age               | 2-3                 | -0.85    | 0.13  | -1.11 | -0.60 |
| Haiti | dia      | Age               | 3-4                 | -1.41    | 0.14  | -1.68 | -1.12 |
| Haiti | dia      | Age               | 4-5                 | -1.91    | 0.15  | -2.20 | -1.60 |
| Haiti | dia      | Month             | February            | -0.03    | 0.17  | -0.37 | 0.30  |
| Haiti | dia      | Month             | March               | -0.35    | 0.15  | -0.64 | -0.06 |
| Haiti | dia      | Month             | April               | -0.14    | 0.19  | -0.52 | 0.24  |
| Haiti | dia      | Month             | December            | 0.12     | 0.15  | -0.18 | 0.42  |
| Haiti | dia      | Wealth            | Poorer              | -0.20    | 0.12  | -0.44 | 0.05  |
| Haiti | dia      | Wealth            | Middle              | -0.04    | 0.15  | -0.32 | 0.25  |
| Haiti | dia      | Wealth            | Richer              | 0.14     | 0.18  | -0.21 | 0.49  |
| Haiti | dia      | Wealth            | Richest             | -0.27    | 0.22  | -0.70 | 0.17  |
| Haiti | dia      | Mothers education | Primary             | 0.12     | 0.12  | -0.11 | 0.35  |
| Haiti | dia      | Mothers education | Secondary           | 0.18     | 0.14  | -0.08 | 0.45  |
| Haiti | dia      | Mothers education | Higher              | -0.15    | 0.29  | -0.72 | 0.40  |
| Haiti | dia      | Mothers age       | 20-30               | -0.04    | 0.13  | -0.30 | 0.23  |
| Haiti | dia      | Mothers age       | 30-40               | -0.12    | 0.14  | -0.40 | 0.16  |
| Haiti | dia      | Mothers age       | 40+                 | -0.04    | 0.20  | -0.44 | 0.36  |
| Haiti | dia      | Sex               | Female              | -0.08    | 0.08  | -0.23 | 0.07  |
| Haiti | dia      | Birth weight      | Average             | -0.16    | 0.10  | -0.34 | 0.03  |
| Haiti | dia      | Birth weight      | Below Average       | -0.21    | 0.11  | -0.44 | 0.01  |
| Haiti | dia      | Breastfed         | No                  | -0.12    | 0.09  | -0.30 | 0.06  |
| Haiti | dia      | Toilet            | Unimproved          | 0.19     | 0.10  | -0.01 | 0.39  |
| Haiti | dia      | Location          | Urban               | 0.16     | 0.15  | -0.13 | 0.44  |
| Haiti | dia      | Cookign fuel      | Solid               | 0.75     | 0.32  | 0.13  | 1.43  |
| Haiti | dia      | Household size    | 05-Oct              | -0.16    | 0.09  | -0.33 | 0.02  |
| Haiti | dia      | Household size    | 10+                 | 0.08     | 0.15  | -0.21 | 0.38  |
| Haiti | dia      | LLIN              | Yes                 | -0.08    | 0.10  | -0.28 | 0.13  |
| Haiti | dia      | Access            | Significant problem | 0.23     | 0.11  | 0.02  | 0.44  |
| Haiti | dia      | Vaccination       | -                   | 0.43     | 0.68  | -0.91 | 1.76  |

| Name  | Response | Group             | Level               | Estimate | Error | lci   | uci   |
|-------|----------|-------------------|---------------------|----------|-------|-------|-------|
| Haiti | fever    | Intercept         | -                   | -0.77    | 0.43  | -1.62 | 0.07  |
| Haiti | fever    | Age               | 1-2                 | -0.06    | 0.12  | -0.30 | 0.18  |
| Haiti | fever    | Age               | 2-3                 | -0.17    | 0.12  | -0.41 | 0.08  |
| Haiti | fever    | Age               | 3-4                 | -0.36    | 0.13  | -0.61 | -0.11 |
| Haiti | fever    | Age               | 4-5                 | -0.57    | 0.13  | -0.82 | -0.32 |
| Haiti | fever    | Month             | February            | -0.11    | 0.16  | -0.43 | 0.21  |
| Haiti | fever    | Month             | March               | -0.04    | 0.14  | -0.31 | 0.24  |
| Haiti | fever    | Month             | April               | -0.08    | 0.19  | -0.44 | 0.28  |
| Haiti | fever    | Month             | December            | 0.72     | 0.15  | 0.44  | 1.01  |
| Haiti | fever    | Wealth            | Poorer              | -0.01    | 0.11  | -0.22 | 0.20  |
| Haiti | fever    | Wealth            | Middle              | -0.01    | 0.13  | -0.27 | 0.24  |
| Haiti | fever    | Wealth            | Richer              | 0.25     | 0.16  | -0.06 | 0.55  |
| Haiti | fever    | Wealth            | Richest             | -0.11    | 0.19  | -0.49 | 0.27  |
| Haiti | fever    | Mothers education | Primary             | -0.23    | 0.10  | -0.42 | -0.04 |
| Haiti | fever    | Mothers education | Secondary           | -0.25    | 0.12  | -0.48 | -0.02 |
| Haiti | fever    | Mothers education | Higher              | -0.17    | 0.24  | -0.63 | 0.29  |
| Haiti | fever    | Mothers age       | 20-30               | 0.06     | 0.12  | -0.18 | 0.30  |
| Haiti | fever    | Mothers age       | 30-40               | -0.01    | 0.13  | -0.25 | 0.24  |
| Haiti | fever    | Mothers age       | 40+                 | -0.07    | 0.18  | -0.42 | 0.28  |
| Haiti | fever    | Sex               | Female              | -0.05    | 0.07  | -0.18 | 0.09  |
| Haiti | fever    | Birth weight      | Average             | -0.04    | 0.09  | -0.21 | 0.13  |
| Haiti | fever    | Birth weight      | Below Average       | 0.11     | 0.10  | -0.08 | 0.31  |
| Haiti | fever    | Breastfed         | No                  | -0.27    | 0.08  | -0.43 | -0.12 |
| Haiti | fever    | Toilet            | Unimproved          | 0.08     | 0.09  | -0.10 | 0.26  |
| Haiti | fever    | Location          | Urban               | -0.17    | 0.14  | -0.44 | 0.09  |
| Haiti | fever    | Cookign fuel      | Solid               | 0.57     | 0.24  | 0.11  | 1.06  |
| Haiti | fever    | Household size    | 05-Oct              | -0.11    | 0.08  | -0.26 | 0.05  |
| Haiti | fever    | Household size    | 10+                 | -0.12    | 0.14  | -0.40 | 0.15  |
| Haiti | fever    | LLIN              | Yes                 | -0.01    | 0.09  | -0.20 | 0.18  |
| Haiti | fever    | Access            | Significant problem | 0.10     | 0.09  | -0.08 | 0.28  |
| Haiti | fever    | Vaccination       | -                   | -0.39    | 0.65  | -1.66 | 0.85  |



| Name  | Response | Group             | Level               | Estimate | Error | lci   | uci   |
|-------|----------|-------------------|---------------------|----------|-------|-------|-------|
| Haiti | wasted   | Intercept         | -                   | -3.08    | 0.96  | -5.00 | -1.23 |
| Haiti | wasted   | Age               | 1-2                 | -0.64    | 0.24  | -1.10 | -0.16 |
| Haiti | wasted   | Age               | 2-3                 | -1.29    | 0.27  | -1.83 | -0.77 |
| Haiti | wasted   | Age               | 3-4                 | -1.87    | 0.33  | -2.53 | -1.26 |
| Haiti | wasted   | Age               | 4-5                 | -1.69    | 0.31  | -2.31 | -1.09 |
| Haiti | wasted   | Month             | February            | -0.14    | 0.38  | -0.90 | 0.59  |
| Haiti | wasted   | Month             | March               | -0.04    | 0.32  | -0.68 | 0.58  |
| Haiti | wasted   | Month             | April               | -0.18    | 0.44  | -1.06 | 0.66  |
| Haiti | wasted   | Month             | December            | 0.34     | 0.32  | -0.29 | 0.96  |
| Haiti | wasted   | Wealth            | Poorer              | -0.23    | 0.28  | -0.79 | 0.30  |
| Haiti | wasted   | Wealth            | Middle              | -0.44    | 0.35  | -1.12 | 0.24  |
| Haiti | wasted   | Wealth            | Richer              | 0.04     | 0.40  | -0.76 | 0.84  |
| Haiti | wasted   | Wealth            | Richest             | 0.04     | 0.49  | -0.92 | 1.00  |
| Haiti | wasted   | Mothers education | Primary             | 0.43     | 0.28  | -0.10 | 0.99  |
| Haiti | wasted   | Mothers education | Secondary           | 0.28     | 0.33  | -0.35 | 0.94  |
| Haiti | wasted   | Mothers education | Higher              | 0.35     | 0.60  | -0.86 | 1.51  |
| Haiti | wasted   | Mothers age       | 20-30               | -0.43    | 0.28  | -0.97 | 0.11  |
| Haiti | wasted   | Mothers age       | 30-40               | -0.65    | 0.30  | -1.24 | -0.06 |
| Haiti | wasted   | Mothers age       | 40+                 | -0.00    | 0.40  | -0.80 | 0.78  |
| Haiti | wasted   | Sex               | Female              | -0.20    | 0.18  | -0.56 | 0.15  |
| Haiti | wasted   | Birth weight      | Average             | 0.54     | 0.26  | 0.05  | 1.08  |
| Haiti | wasted   | Birth weight      | Below Average       | 0.61     | 0.29  | 0.06  | 1.18  |
| Haiti | wasted   | Breastfed         | No                  | -0.02    | 0.21  | -0.43 | 0.39  |
| Haiti | wasted   | Toilet            | Unimproved          | 0.29     | 0.25  | -0.19 | 0.77  |
| Haiti | wasted   | Location          | Urban               | 0.25     | 0.33  | -0.39 | 0.90  |
| Haiti | wasted   | Cookign fuel      | Solid               | -0.04    | 0.55  | -1.07 | 1.09  |
| Haiti | wasted   | Household size    | 05-Oct              | -0.02    | 0.21  | -0.42 | 0.39  |
| Haiti | wasted   | Household size    | 10+                 | 0.26     | 0.33  | -0.40 | 0.90  |
| Haiti | wasted   | LLIN              | Yes                 | -0.65    | 0.28  | -1.21 | -0.12 |
| Haiti | wasted   | Access            | Significant problem | 0.11     | 0.25  | -0.37 | 0.61  |
| Haiti | wasted   | Vaccination       | -                   | -0.33    | 1.43  | -3.18 | 2.53  |

| Name    | Response | Group             | Level               | Estimate | Error | lci    | uci   |
|---------|----------|-------------------|---------------------|----------|-------|--------|-------|
| Haryana | ari      | Intercept         | -                   | -3.29    | 2.97  | -9.07  | 2.59  |
| Haryana | ari      | Age               | 1-2                 | -0.22    | 0.32  | -0.83  | 0.40  |
| Haryana | ari      | Age               | 2-3                 | -0.29    | 0.32  | -0.92  | 0.33  |
| Haryana | ari      | Age               | 3-4                 | -0.80    | 0.35  | -1.48  | -0.12 |
| Haryana | ari      | Age               | 4-5                 | -0.76    | 0.35  | -1.44  | -0.08 |
| Haryana | ari      | Month             | March               | -0.09    | 0.31  | -0.70  | 0.53  |
| Haryana | ari      | Month             | April               | -0.78    | 0.35  | -1.46  | -0.09 |
| Haryana | ari      | Month             | May                 | -1.27    | 0.41  | -2.08  | -0.47 |
| Haryana | ari      | Month             | June                | -0.87    | 0.46  | -1.81  | 0.00  |
| Haryana | ari      | Wealth            | Poorer              | 0.00     | 0.50  | -0.93  | 1.03  |
| Haryana | ari      | Wealth            | Middle              | -0.11    | 0.49  | -1.03  | 0.89  |
| Haryana | ari      | Wealth            | Richer              | -0.05    | 0.53  | -1.05  | 1.01  |
| Haryana | ari      | Wealth            | Richest             | -0.23    | 0.57  | -1.32  | 0.92  |
| Haryana | ari      | Mothers education | Primary             | -0.10    | 0.33  | -0.74  | 0.52  |
| Haryana | ari      | Mothers education | Secondary           | -0.14    | 0.27  | -0.65  | 0.38  |
| Haryana | ari      | Mothers education | Higher              | -0.51    | 0.42  | -1.36  | 0.29  |
| Haryana | ari      | Mothers age       | 20-30               | 0.10     | 0.36  | -0.57  | 0.84  |
| Haryana | ari      | Mothers age       | 30-40               | 0.28     | 0.43  | -0.56  | 1.16  |
| Haryana | ari      | Sex               | Female              | -0.18    | 0.19  | -0.56  | 0.19  |
| Haryana | ari      | Birth weight      | Average             | -0.24    | 0.26  | -0.73  | 0.28  |
| Haryana | ari      | Birth weight      | Below Average       | 0.28     | 0.36  | -0.44  | 0.98  |
| Haryana | ari      | Breastfed         | No                  | 0.17     | 0.21  | -0.23  | 0.58  |
| Haryana | ari      | Toilet            | Unimproved          | 0.15     | 0.29  | -0.42  | 0.72  |
| Haryana | ari      | Toilet            | Improved            | 0.12     | 0.56  | -1.04  | 1.16  |
| Haryana | ari      | Location          | Urban               | 0.08     | 0.27  | -0.44  | 0.62  |
| Haryana | ari      | Cookign fuel      | Solid               | 0.01     | 0.27  | -0.51  | 0.56  |
| Haryana | ari      | Household size    | 05-Oct              | 0.13     | 0.28  | -0.42  | 0.71  |
| Haryana | ari      | Household size    | 10+                 | 0.40     | 0.35  | -0.28  | 1.10  |
| Haryana | ari      | LLIN              | Yes                 | 1.11     | 0.53  | 0.02   | 2.08  |
| Haryana | ari      | Access            | Significant problem | 0.37     | 0.21  | -0.05  | 0.78  |
| Haryana | ari      | Vaccination       | -                   | -0.02    | 5.10  | -10.09 | 9.90  |

| Name    | Response | Group             | Level               | Estimate | Error | Ici   | uci   |
|---------|----------|-------------------|---------------------|----------|-------|-------|-------|
| Haryana | dia      | Intercept         | -                   | -1.28    | 2.83  | -6.84 | 4.21  |
| Haryana | dia      | Age               | 1-2                 | -0.37    | 0.18  | -0.72 | -0.01 |
| Haryana | dia      | Age               | 2-3                 | -0.86    | 0.20  | -1.23 | -0.47 |
| Haryana | dia      | Age               | 3-4                 | -1.12    | 0.21  | -1.53 | -0.71 |
| Haryana | dia      | Age               | 4-5                 | -1.57    | 0.24  | -2.04 | -1.10 |
| Haryana | dia      | Month             | March               | -0.08    | 0.22  | -0.52 | 0.37  |
| Haryana | dia      | Month             | April               | -0.38    | 0.24  | -0.85 | 0.09  |
| Haryana | dia      | Month             | May                 | 0.29     | 0.23  | -0.16 | 0.75  |
| Haryana | dia      | Month             | June                | -0.05    | 0.28  | -0.59 | 0.50  |
| Haryana | dia      | Wealth            | Poorer              | -0.48    | 0.38  | -1.23 | 0.25  |
| Haryana | dia      | Wealth            | Middle              | -0.93    | 0.38  | -1.65 | -0.19 |
| Haryana | dia      | Wealth            | Richer              | -1.04    | 0.39  | -1.83 | -0.26 |
| Haryana | dia      | Wealth            | Richest             | -0.65    | 0.41  | -1.45 | 0.14  |
| Haryana | dia      | Mothers education | Primary             | -0.13    | 0.23  | -0.59 | 0.32  |
| Haryana | dia      | Mothers education | Secondary           | -0.05    | 0.18  | -0.41 | 0.32  |
| Haryana | dia      | Mothers education | Higher              | -0.15    | 0.25  | -0.63 | 0.34  |
| Haryana | dia      | Mothers age       | 20-30               | -0.10    | 0.24  | -0.55 | 0.38  |
| Haryana | dia      | Mothers age       | 30-40               | 0.05     | 0.30  | -0.53 | 0.63  |
| Haryana | dia      | Sex               | Female              | -0.02    | 0.13  | -0.27 | 0.22  |
| Haryana | dia      | Birth weight      | Average             | 0.04     | 0.18  | -0.31 | 0.41  |
| Haryana | dia      | Birth weight      | Below Average       | 0.60     | 0.25  | 0.10  | 1.06  |
| Haryana | dia      | Breastfed         | No                  | -0.14    | 0.14  | -0.41 | 0.13  |
| Haryana | dia      | Toilet            | Unimproved          | -0.17    | 0.22  | -0.61 | 0.25  |
| Haryana | dia      | Toilet            | Improved            | -0.56    | 0.54  | -1.72 | 0.39  |
| Haryana | dia      | Location          | Urban               | 0.11     | 0.17  | -0.23 | 0.43  |
| Haryana | dia      | Cookign fuel      | Solid               | 0.11     | 0.17  | -0.22 | 0.45  |
| Haryana | dia      | Household size    | 05-Oct              | -0.01    | 0.17  | -0.34 | 0.32  |
| Haryana | dia      | Household size    | 10+                 | 0.36     | 0.22  | -0.07 | 0.80  |
| Haryana | dia      | LLIN              | Yes                 | 0.64     | 0.34  | -0.05 | 1.29  |
| Haryana | dia      | Access            | Significant problem | 0.17     | 0.14  | -0.11 | 0.44  |
| Haryana | dia      | Vaccination       | -                   | -0.03    | 4.93  | -9.74 | 9.83  |

| Name    | Response | Group             | Level               | Estimate | Error | lci    | uci   |
|---------|----------|-------------------|---------------------|----------|-------|--------|-------|
| Haryana | fever    | Intercept         | -                   | -1.39    | 2.89  | -7.14  | 4.36  |
| Haryana | fever    | Age               | 1-2                 | -0.14    | 0.19  | -0.51  | 0.23  |
| Haryana | fever    | Age               | 2-3                 | -0.49    | 0.20  | -0.88  | -0.10 |
| Haryana | fever    | Age               | 3-4                 | -0.60    | 0.20  | -0.99  | -0.20 |
| Haryana | fever    | Age               | 4-5                 | -0.81    | 0.21  | -1.22  | -0.39 |
| Haryana | fever    | Month             | March               | -0.37    | 0.21  | -0.80  | 0.04  |
| Haryana | fever    | Month             | April               | -0.70    | 0.22  | -1.13  | -0.27 |
| Haryana | fever    | Month             | May                 | -0.78    | 0.23  | -1.24  | -0.33 |
| Haryana | fever    | Month             | June                | -1.14    | 0.29  | -1.73  | -0.58 |
| Haryana | fever    | Wealth            | Poorer              | -0.16    | 0.36  | -0.86  | 0.54  |
| Haryana | fever    | Wealth            | Middle              | -0.29    | 0.36  | -0.98  | 0.42  |
| Haryana | fever    | Wealth            | Richer              | -0.32    | 0.37  | -1.03  | 0.43  |
| Haryana | fever    | Wealth            | Richest             | -0.29    | 0.40  | -1.06  | 0.50  |
| Haryana | fever    | Mothers education | Primary             | 0.54     | 0.19  | 0.16   | 0.92  |
| Haryana | fever    | Mothers education | Secondary           | 0.06     | 0.18  | -0.29  | 0.40  |
| Haryana | fever    | Mothers education | Higher              | -0.20    | 0.24  | -0.67  | 0.27  |
| Haryana | fever    | Mothers age       | 20-30               | 0.15     | 0.23  | -0.29  | 0.62  |
| Haryana | fever    | Mothers age       | 30-40               | -0.05    | 0.29  | -0.62  | 0.54  |
| Haryana | fever    | Sex               | Female              | -0.23    | 0.12  | -0.47  | -0.00 |
| Haryana | fever    | Birth weight      | Average             | -0.29    | 0.16  | -0.60  | 0.02  |
| Haryana | fever    | Birth weight      | Below Average       | 0.09     | 0.23  | -0.37  | 0.53  |
| Haryana | fever    | Breastfed         | No                  | -0.12    | 0.13  | -0.37  | 0.14  |
| Haryana | fever    | Toilet            | Unimproved          | 0.16     | 0.19  | -0.23  | 0.54  |
| Haryana | fever    | Toilet            | Improved            | -0.22    | 0.41  | -1.05  | 0.54  |
| Haryana | fever    | Location          | Urban               | -0.04    | 0.17  | -0.38  | 0.29  |
| Haryana | fever    | Cookign fuel      | Solid               | -0.20    | 0.17  | -0.52  | 0.13  |
| Haryana | fever    | Household size    | 05-Oct              | 0.24     | 0.17  | -0.08  | 0.57  |
| Haryana | fever    | Household size    | 10+                 | 0.44     | 0.22  | 0.02   | 0.86  |
| Haryana | fever    | LLIN              | Yes                 | 0.36     | 0.38  | -0.42  | 1.07  |
| Haryana | fever    | Access            | Significant problem | 0.07     | 0.13  | -0.19  | 0.33  |
| Haryana | fever    | Vaccination       | -                   | -0.07    | 5.07  | -10.13 | 9.82  |

| Name    | Response | Group             | Level               | Estimate | Error | Ici   | uci   |
|---------|----------|-------------------|---------------------|----------|-------|-------|-------|
| Haryana | wasted   | Intercept         | -                   | -1.62    | 2.82  | -7.19 | 3.78  |
| Haryana | wasted   | Age               | 1-2                 | -0.34    | 0.15  | -0.64 | -0.05 |
| Haryana | wasted   | Age               | 2-3                 | -0.22    | 0.14  | -0.51 | 0.07  |
| Haryana | wasted   | Age               | 3-4                 | -0.34    | 0.15  | -0.63 | -0.05 |
| Haryana | wasted   | Age               | 4-5                 | -0.36    | 0.15  | -0.66 | -0.07 |
| Haryana | wasted   | Month             | March               | -0.24    | 0.17  | -0.57 | 0.11  |
| Haryana | wasted   | Month             | April               | 0.10     | 0.17  | -0.23 | 0.43  |
| Haryana | wasted   | Month             | May                 | 0.54     | 0.17  | 0.21  | 0.86  |
| Haryana | wasted   | Month             | June                | 0.33     | 0.20  | -0.04 | 0.72  |
| Haryana | wasted   | Wealth            | Poorer              | 0.40     | 0.34  | -0.25 | 1.07  |
| Haryana | wasted   | Wealth            | Middle              | 0.46     | 0.34  | -0.19 | 1.13  |
| Haryana | wasted   | Wealth            | Richer              | 0.45     | 0.35  | -0.20 | 1.14  |
| Haryana | wasted   | Wealth            | Richest             | 0.20     | 0.36  | -0.48 | 0.92  |
| Haryana | wasted   | Mothers education | Primary             | -0.06    | 0.15  | -0.35 | 0.21  |
| Haryana | wasted   | Mothers education | Secondary           | -0.07    | 0.12  | -0.31 | 0.17  |
| Haryana | wasted   | Mothers education | Higher              | -0.17    | 0.17  | -0.51 | 0.17  |
| Haryana | wasted   | Mothers age       | 20-30               | 0.01     | 0.16  | -0.30 | 0.32  |
| Haryana | wasted   | Mothers age       | 30-40               | 0.08     | 0.20  | -0.31 | 0.48  |
| Haryana | wasted   | Sex               | Female              | -0.05    | 0.08  | -0.22 | 0.11  |
| Haryana | wasted   | Birth weight      | Average             | 0.01     | 0.12  | -0.23 | 0.24  |
| Haryana | wasted   | Birth weight      | Below Average       | 0.18     | 0.18  | -0.17 | 0.52  |
| Haryana | wasted   | Breastfed         | No                  | -0.13    | 0.09  | -0.31 | 0.04  |
| Haryana | wasted   | Toilet            | Unimproved          | 0.26     | 0.14  | -0.00 | 0.54  |
| Haryana | wasted   | Toilet            | Improved            | -0.20    | 0.34  | -0.89 | 0.44  |
| Haryana | wasted   | Location          | Urban               | 0.11     | 0.12  | -0.12 | 0.35  |
| Haryana | wasted   | Cookign fuel      | Solid               | -0.21    | 0.11  | -0.43 | 0.01  |
| Haryana | wasted   | Household size    | 05-Oct              | 0.07     | 0.11  | -0.14 | 0.28  |
| Haryana | wasted   | Household size    | 10+                 | -0.14    | 0.16  | -0.45 | 0.18  |
| Haryana | wasted   | LLIN              | Yes                 | 0.38     | 0.26  | -0.14 | 0.88  |
| Haryana | wasted   | Access            | Significant problem | 0.15     | 0.10  | -0.04 | 0.34  |
| Haryana | wasted   | Vaccination       | -                   | -0.01    | 4.94  | -9.45 | 9.71  |

| Name             | Response | Group             | Level               | Estimate | Error | lci    | uci   |
|------------------|----------|-------------------|---------------------|----------|-------|--------|-------|
| Himachal Pradesh | ari      | Intercept         | -                   | -6.09    | 4.43  | -15.00 | 2.48  |
| Himachal Pradesh | ari      | Age               | 1-2                 | 0.30     | 0.98  | -1.51  | 2.39  |
| Himachal Pradesh | ari      | Age               | 2-3                 | -0.54    | 1.14  | -2.76  | 1.79  |
| Himachal Pradesh | ari      | Age               | 3-4                 | -0.04    | 1.04  | -2.00  | 2.14  |
| Himachal Pradesh | ari      | Age               | 4-5                 | -0.77    | 1.14  | -3.01  | 1.53  |
| Himachal Pradesh | ari      | Month             | March               | -0.13    | 0.76  | -1.61  | 1.37  |
| Himachal Pradesh | ari      | Month             | April               | -1.12    | 1.01  | -3.24  | 0.76  |
| Himachal Pradesh | ari      | Month             | May                 | -2.08    | 1.56  | -5.66  | 0.44  |
| Himachal Pradesh | ari      | Month             | June                | -0.75    | 0.94  | -2.66  | 1.01  |
| Himachal Pradesh | ari      | Month             | July                | -1.96    | 2.42  | -7.58  | 1.79  |
| Himachal Pradesh | ari      | Wealth            | Poorer              | -0.06    | 1.85  | -3.62  | 3.79  |
| Himachal Pradesh | ari      | Wealth            | Middle              | 0.44     | 1.67  | -2.55  | 4.05  |
| Himachal Pradesh | ari      | Wealth            | Richer              | 0.71     | 1.68  | -2.29  | 4.36  |
| Himachal Pradesh | ari      | Wealth            | Richest             | 1.23     | 1.77  | -1.91  | 5.06  |
| Himachal Pradesh | ari      | Mothers education | Primary             | 1.13     | 1.96  | -2.42  | 5.35  |
| Himachal Pradesh | ari      | Mothers education | Secondary           | 1.39     | 1.77  | -1.57  | 5.43  |
| Himachal Pradesh | ari      | Mothers education | Higher              | 1.42     | 1.89  | -1.84  | 5.58  |
| Himachal Pradesh | ari      | Mothers age       | 20-30               | -0.99    | 1.02  | -2.81  | 1.19  |
| Himachal Pradesh | ari      | Mothers age       | 30-40               | -1.87    | 1.42  | -4.79  | 0.87  |
| Himachal Pradesh | ari      | Sex               | Female              | 0.30     | 0.57  | -0.81  | 1.44  |
| Himachal Pradesh | ari      | Birth weight      | Average             | -0.08    | 1.05  | -1.88  | 2.22  |
| Himachal Pradesh | ari      | Birth weight      | Below Average       | 0.52     | 1.17  | -1.59  | 3.00  |
| Himachal Pradesh | ari      | Breastfed         | No                  | 0.10     | 0.62  | -1.11  | 1.29  |
| Himachal Pradesh | ari      | Toilet            | Unimproved          | 0.56     | 0.80  | -1.10  | 2.06  |
| Himachal Pradesh | ari      | Toilet            | Improved            | -0.10    | 1.39  | -3.31  | 2.18  |
| Himachal Pradesh | ari      | Location          | Urban               | -0.34    | 1.70  | -4.27  | 2.45  |
| Himachal Pradesh | ari      | Cookign fuel      | Solid               | 1.00     | 0.91  | -0.66  | 2.94  |
| Himachal Pradesh | ari      | Household size    | 05-Oct              | -0.44    | 0.65  | -1.69  | 0.89  |
| Himachal Pradesh | ari      | Household size    | 10+                 | -3.14    | 2.00  | -7.87  | -0.04 |
| Himachal Pradesh | ari      | LLIN              | Yes                 | -1.61    | 4.06  | -10.32 | 5.35  |
| Himachal Pradesh | ari      | Access            | Significant problem | 0.45     | 0.62  | -0.82  | 1.62  |
| Himachal Pradesh | ari      | Vaccination       | -                   | -0.11    | 4.99  | -9.84  | 9.73  |

| Name             | Response | Group             | Level               | Estimate | Error | lci    | uci   |
|------------------|----------|-------------------|---------------------|----------|-------|--------|-------|
| Himachal Pradesh | dia      | Intercept         | -                   | -5.21    | 3.96  | -13.16 | 2.37  |
| Himachal Pradesh | dia      | Age               | 1-2                 | -0.37    | 0.44  | -1.22  | 0.53  |
| Himachal Pradesh | dia      | Age               | 2-3                 | -0.64    | 0.47  | -1.54  | 0.30  |
| Himachal Pradesh | dia      | Age               | 3-4                 | -2.05    | 0.64  | -3.40  | -0.88 |
| Himachal Pradesh | dia      | Age               | 4-5                 | -1.71    | 0.58  | -2.88  | -0.58 |
| Himachal Pradesh | dia      | Month             | March               | 0.15     | 0.48  | -0.77  | 1.10  |
| Himachal Pradesh | dia      | Month             | April               | -0.69    | 0.59  | -1.87  | 0.47  |
| Himachal Pradesh | dia      | Month             | May                 | 0.12     | 0.56  | -0.97  | 1.22  |
| Himachal Pradesh | dia      | Month             | June                | -0.42    | 0.54  | -1.52  | 0.63  |
| Himachal Pradesh | dia      | Month             | July                | -0.19    | 1.06  | -2.52  | 1.64  |
| Himachal Pradesh | dia      | Wealth            | Poorer              | -0.74    | 1.08  | -2.76  | 1.51  |
| Himachal Pradesh | dia      | Wealth            | Middle              | -0.55    | 1.02  | -2.41  | 1.59  |
| Himachal Pradesh | dia      | Wealth            | Richer              | -0.54    | 1.03  | -2.39  | 1.64  |
| Himachal Pradesh | dia      | Wealth            | Richest             | -0.08    | 1.09  | -2.08  | 2.17  |
| Himachal Pradesh | dia      | Mothers education | Primary             | 3.36     | 1.85  | 0.34   | 7.55  |
| Himachal Pradesh | dia      | Mothers education | Secondary           | 2.83     | 1.80  | -0.06  | 6.91  |
| Himachal Pradesh | dia      | Mothers education | Higher              | 2.92     | 1.84  | -0.08  | 7.11  |
| Himachal Pradesh | dia      | Mothers age       | 20-30               | 0.32     | 0.89  | -1.18  | 2.27  |
| Himachal Pradesh | dia      | Mothers age       | 30-40               | 0.14     | 0.97  | -1.59  | 2.23  |
| Himachal Pradesh | dia      | Sex               | Female              | -0.17    | 0.32  | -0.82  | 0.46  |
| Himachal Pradesh | dia      | Birth weight      | Average             | 0.29     | 0.64  | -0.87  | 1.62  |
| Himachal Pradesh | dia      | Birth weight      | Below Average       | 0.94     | 0.70  | -0.35  | 2.37  |
| Himachal Pradesh | dia      | Breastfed         | No                  | 0.11     | 0.35  | -0.58  | 0.78  |
| Himachal Pradesh | dia      | Toilet            | Unimproved          | 0.40     | 0.47  | -0.54  | 1.28  |
| Himachal Pradesh | dia      | Toilet            | Improved            | 0.44     | 0.68  | -1.00  | 1.66  |
| Himachal Pradesh | dia      | Location          | Urban               | 0.21     | 0.60  | -1.04  | 1.34  |
| Himachal Pradesh | dia      | Cookign fuel      | Solid               | -0.34    | 0.44  | -1.21  | 0.52  |
| Himachal Pradesh | dia      | Household size    | 05-Oct              | 0.09     | 0.41  | -0.71  | 0.92  |
| Himachal Pradesh | dia      | Household size    | 10+                 | 0.34     | 0.59  | -0.83  | 1.48  |
| Himachal Pradesh | dia      | LLIN              | Yes                 | 2.09     | 2.13  | -2.40  | 6.02  |
| Himachal Pradesh | dia      | Access            | Significant problem | 0.23     | 0.36  | -0.51  | 0.90  |
| Himachal Pradesh | dia      | Vaccination       | -                   | 0.03     | 5.06  | -9.87  | 9.93  |

| Name             | Response | Group             | Level               | Estimate | Error | lci    | uci   |
|------------------|----------|-------------------|---------------------|----------|-------|--------|-------|
| Himachal Pradesh | fever    | Intercept         | -                   | -2.84    | 3.55  | -9.87  | 4.14  |
| Himachal Pradesh | fever    | Age               | 1-2                 | -0.24    | 0.38  | -0.98  | 0.51  |
| Himachal Pradesh | fever    | Age               | 2-3                 | -0.22    | 0.38  | -0.97  | 0.55  |
| Himachal Pradesh | fever    | Age               | 3-4                 | -0.12    | 0.37  | -0.85  | 0.63  |
| Himachal Pradesh | fever    | Age               | 4-5                 | -0.70    | 0.42  | -1.52  | 0.11  |
| Himachal Pradesh | fever    | Month             | March               | -0.01    | 0.34  | -0.67  | 0.66  |
| Himachal Pradesh | fever    | Month             | April               | -0.35    | 0.39  | -1.11  | 0.39  |
| Himachal Pradesh | fever    | Month             | May                 | -0.50    | 0.46  | -1.41  | 0.36  |
| Himachal Pradesh | fever    | Month             | June                | -0.18    | 0.37  | -0.92  | 0.56  |
| Himachal Pradesh | fever    | Month             | July                | -0.15    | 0.72  | -1.69  | 1.17  |
| Himachal Pradesh | fever    | Wealth            | Poorer              | -1.27    | 0.82  | -2.83  | 0.40  |
| Himachal Pradesh | fever    | Wealth            | Middle              | -0.75    | 0.76  | -2.18  | 0.80  |
| Himachal Pradesh | fever    | Wealth            | Richer              | -0.70    | 0.77  | -2.14  | 0.87  |
| Himachal Pradesh | fever    | Wealth            | Richest             | -0.61    | 0.81  | -2.16  | 1.01  |
| Himachal Pradesh | fever    | Mothers education | Primary             | 1.36     | 1.11  | -0.61  | 3.78  |
| Himachal Pradesh | fever    | Mothers education | Secondary           | 1.90     | 1.04  | 0.13   | 4.17  |
| Himachal Pradesh | fever    | Mothers education | Higher              | 1.51     | 1.08  | -0.37  | 3.86  |
| Himachal Pradesh | fever    | Mothers age       | 20-30               | 0.11     | 0.58  | -0.92  | 1.34  |
| Himachal Pradesh | fever    | Mothers age       | 30-40               | 0.14     | 0.64  | -1.04  | 1.45  |
| Himachal Pradesh | fever    | Sex               | Female              | -0.11    | 0.23  | -0.55  | 0.32  |
| Himachal Pradesh | fever    | Birth weight      | Average             | -0.37    | 0.39  | -1.11  | 0.41  |
| Himachal Pradesh | fever    | Birth weight      | Below Average       | 0.43     | 0.44  | -0.43  | 1.29  |
| Himachal Pradesh | fever    | Breastfed         | No                  | -0.01    | 0.24  | -0.48  | 0.45  |
| Himachal Pradesh | fever    | Toilet            | Unimproved          | 0.23     | 0.33  | -0.43  | 0.85  |
| Himachal Pradesh | fever    | Toilet            | Improved            | 0.09     | 0.52  | -0.98  | 1.06  |
| Himachal Pradesh | fever    | Location          | Urban               | 0.19     | 0.46  | -0.76  | 1.06  |
| Himachal Pradesh | fever    | Cookign fuel      | Solid               | -0.09    | 0.31  | -0.70  | 0.53  |
| Himachal Pradesh | fever    | Household size    | 05-Oct              | 0.25     | 0.30  | -0.33  | 0.85  |
| Himachal Pradesh | fever    | Household size    | 10+                 | 0.27     | 0.43  | -0.59  | 1.12  |
| Himachal Pradesh | fever    | LLIN              | Yes                 | -2.89    | 3.54  | -10.85 | 2.67  |
| Himachal Pradesh | fever    | Access            | Significant problem | 0.27     | 0.25  | -0.23  | 0.76  |
| Himachal Pradesh | fever    | Vaccination       | -                   | 0.03     | 5.08  | -10.09 | 10.00 |



| Name   | Response | Group             | Level               | Estimate | Error | lci   | uci   |
|--------|----------|-------------------|---------------------|----------|-------|-------|-------|
| Angola | wasted   | Intercept         | -                   | -2.98    | 0.57  | -4.13 | -1.87 |
| Angola | wasted   | Age               | 1-2                 | -0.43    | 0.20  | -0.82 | -0.04 |
| Angola | wasted   | Age               | 2-3                 | -0.88    | 0.23  | -1.33 | -0.43 |
| Angola | wasted   | Age               | 3-4                 | -1.91    | 0.29  | -2.49 | -1.35 |
| Angola | wasted   | Age               | 4-5                 | -1.30    | 0.26  | -1.81 | -0.78 |
| Angola | wasted   | Month             | February            | -0.03    | 0.28  | -0.59 | 0.52  |
| Angola | wasted   | Month             | March               | -0.22    | 0.43  | -1.10 | 0.59  |
| Angola | wasted   | Month             | October             | -0.49    | 0.40  | -1.30 | 0.29  |
| Angola | wasted   | Month             | November            | -0.25    | 0.26  | -0.74 | 0.26  |
| Angola | wasted   | Month             | December            | -0.53    | 0.28  | -1.10 | 0.01  |
| Angola | wasted   | Wealth            | Poorer              | -0.31    | 0.24  | -0.80 | 0.17  |
| Angola | wasted   | Wealth            | Middle              | -0.48    | 0.37  | -1.22 | 0.24  |
| Angola | wasted   | Wealth            | Richer              | -0.70    | 0.45  | -1.59 | 0.17  |
| Angola | wasted   | Wealth            | Richest             | -0.67    | 0.48  | -1.62 | 0.27  |
| Angola | wasted   | Mothers education | Primary             | -0.13    | 0.18  | -0.48 | 0.22  |
| Angola | wasted   | Mothers education | Secondary           | -0.48    | 0.24  | -0.95 | -0.01 |
| Angola | wasted   | Mothers education | Higher              | -0.75    | 0.64  | -2.10 | 0.42  |
| Angola | wasted   | Mothers age       | 20-30               | 0.34     | 0.21  | -0.06 | 0.77  |
| Angola | wasted   | Mothers age       | 30-40               | 0.24     | 0.25  | -0.24 | 0.74  |
| Angola | wasted   | Mothers age       | 40+                 | 0.03     | 0.41  | -0.80 | 0.78  |
| Angola | wasted   | Sex               | Female              | -0.46    | 0.15  | -0.75 | -0.18 |
| Angola | wasted   | Birth weight      | Average             | 0.71     | 0.19  | 0.34  | 1.10  |
| Angola | wasted   | Birth weight      | Below Average       | 0.93     | 0.27  | 0.40  | 1.45  |
| Angola | wasted   | Breastfed         | No                  | 0.35     | 0.17  | 0.01  | 0.70  |
| Angola | wasted   | Toilet            | Improved            | -0.17    | 0.21  | -0.57 | 0.24  |
| Angola | wasted   | Location          | Urban               | 0.47     | 0.28  | -0.06 | 1.02  |
| Angola | wasted   | Cookign fuel      | Solid               | -0.01    | 0.28  | -0.57 | 0.53  |
| Angola | wasted   | Household size    | 05-Oct              | -0.13    | 0.18  | -0.48 | 0.22  |
| Angola | wasted   | Household size    | 10+                 | -0.24    | 0.29  | -0.82 | 0.32  |
| Angola | wasted   | LLIN              | Yes                 | -0.22    | 0.19  | -0.60 | 0.14  |
| Angola | wasted   | Access            | Significant problem | 0.53     | 0.18  | 0.18  | 0.89  |
| Angola | wasted   | Vaccination       | -                   | -0.00    | 0.99  | -1.93 | 1.96  |

| Name             | Response | Group             | Level               | Estimate | Error | lci    | uci  |
|------------------|----------|-------------------|---------------------|----------|-------|--------|------|
| Himachal Pradesh | wasted   | Intercept         | -                   | -1.30    | 3.42  | -7.97  | 5.33 |
| Himachal Pradesh | wasted   | Age               | 1-2                 | -0.49    | 0.38  | -1.21  | 0.27 |
| Himachal Pradesh | wasted   | Age               | 2-3                 | -0.44    | 0.38  | -1.18  | 0.32 |
| Himachal Pradesh | wasted   | Age               | 3-4                 | -0.71    | 0.39  | -1.45  | 0.06 |
| Himachal Pradesh | wasted   | Age               | 4-5                 | -0.58    | 0.39  | -1.33  | 0.18 |
| Himachal Pradesh | wasted   | Month             | March               | -0.41    | 0.38  | -1.15  | 0.37 |
| Himachal Pradesh | wasted   | Month             | April               | 0.15     | 0.38  | -0.57  | 0.91 |
| Himachal Pradesh | wasted   | Month             | May                 | 0.53     | 0.41  | -0.26  | 1.36 |
| Himachal Pradesh | wasted   | Month             | June                | 0.10     | 0.38  | -0.63  | 0.86 |
| Himachal Pradesh | wasted   | Month             | July                | -0.06    | 0.72  | -1.54  | 1.25 |
| Himachal Pradesh | wasted   | Wealth            | Poorer              | 0.62     | 0.88  | -0.99  | 2.50 |
| Himachal Pradesh | wasted   | Wealth            | Middle              | 0.01     | 0.89  | -1.62  | 1.87 |
| Himachal Pradesh | wasted   | Wealth            | Richer              | 0.07     | 0.90  | -1.52  | 1.97 |
| Himachal Pradesh | wasted   | Wealth            | Richest             | -0.24    | 0.94  | -1.95  | 1.68 |
| Himachal Pradesh | wasted   | Mothers education | Primary             | -0.30    | 0.69  | -1.65  | 1.08 |
| Himachal Pradesh | wasted   | Mothers education | Secondary           | 0.24     | 0.60  | -0.85  | 1.45 |
| Himachal Pradesh | wasted   | Mothers education | Higher              | -0.07    | 0.67  | -1.35  | 1.29 |
| Himachal Pradesh | wasted   | Mothers age       | 20-30               | -0.25    | 0.53  | -1.22  | 0.84 |
| Himachal Pradesh | wasted   | Mothers age       | 30-40               | 0.09     | 0.58  | -1.01  | 1.26 |
| Himachal Pradesh | wasted   | Sex               | Female              | 0.07     | 0.22  | -0.37  | 0.51 |
| Himachal Pradesh | wasted   | Birth weight      | Average             | -0.09    | 0.39  | -0.82  | 0.72 |
| Himachal Pradesh | wasted   | Birth weight      | Below Average       | -0.02    | 0.46  | -0.90  | 0.89 |
| Himachal Pradesh | wasted   | Breastfed         | No                  | -0.09    | 0.24  | -0.58  | 0.39 |
| Himachal Pradesh | wasted   | Toilet            | Unimproved          | -0.20    | 0.33  | -0.86  | 0.43 |
| Himachal Pradesh | wasted   | Toilet            | Improved            | 0.05     | 0.51  | -1.01  | 0.99 |
| Himachal Pradesh | wasted   | Location          | Urban               | 0.39     | 0.41  | -0.43  | 1.17 |
| Himachal Pradesh | wasted   | Cookign fuel      | Solid               | -0.14    | 0.32  | -0.76  | 0.50 |
| Himachal Pradesh | wasted   | Household size    | 05-Oct              | -0.15    | 0.28  | -0.68  | 0.41 |
| Himachal Pradesh | wasted   | Household size    | 10+                 | -0.16    | 0.42  | -1.01  | 0.64 |
| Himachal Pradesh | wasted   | LLIN              | Yes                 | -3.23    | 3.39  | -10.93 | 2.11 |
| Himachal Pradesh | wasted   | Access            | Significant problem | -0.01    | 0.26  | -0.53  | 0.49 |
| Himachal Pradesh | wasted   | Vaccination       | -                   | 0.00     | 4.98  | -9.58  | 9.80 |

| Name            | Response | Group             | Level               | Estimate | Error | lci   | uci  |
|-----------------|----------|-------------------|---------------------|----------|-------|-------|------|
| Jammu & Kashmir | ari      | Intercept         | -                   | -1.95    | 3.57  | -8.99 | 5.13 |
| Jammu & Kashmir | ari      | Age               | 1-2                 | -0.08    | 0.43  | -0.89 | 0.80 |
| Jammu & Kashmir | ari      | Age               | 2-3                 | -0.47    | 0.45  | -1.33 | 0.42 |
| Jammu & Kashmir | ari      | Age               | 3-4                 | -0.53    | 0.47  | -1.44 | 0.39 |
| Jammu & Kashmir | ari      | Age               | 4-5                 | -0.63    | 0.47  | -1.56 | 0.29 |
| Jammu & Kashmir | ari      | Month             | March               | 0.09     | 0.40  | -0.68 | 0.89 |
| Jammu & Kashmir | ari      | Month             | April               | 0.12     | 0.42  | -0.70 | 0.96 |
| Jammu & Kashmir | ari      | Month             | May                 | 0.11     | 0.44  | -0.75 | 0.97 |
| Jammu & Kashmir | ari      | Month             | June                | -0.28    | 0.68  | -1.71 | 0.96 |
| Jammu & Kashmir | ari      | Month             | July                | -0.78    | 1.17  | -3.35 | 1.18 |
| Jammu & Kashmir | ari      | Month             | October             | -2.00    | 1.86  | -6.44 | 0.80 |
| Jammu & Kashmir | ari      | Month             | November            | -0.58    | 0.74  | -2.10 | 0.80 |
| Jammu & Kashmir | ari      | Wealth            | Poorer              | 0.07     | 0.55  | -0.98 | 1.20 |
| Jammu & Kashmir | ari      | Wealth            | Middle              | 0.06     | 0.57  | -1.03 | 1.22 |
| Jammu & Kashmir | ari      | Wealth            | Richer              | -0.17    | 0.62  | -1.35 | 1.06 |
| Jammu & Kashmir | ari      | Wealth            | Richest             | -0.49    | 0.70  | -1.85 | 0.94 |
| Jammu & Kashmir | ari      | Mothers education | Primary             | -0.18    | 0.61  | -1.48 | 0.95 |
| Jammu & Kashmir | ari      | Mothers education | Secondary           | 0.03     | 0.33  | -0.62 | 0.70 |
| Jammu & Kashmir | ari      | Mothers education | Higher              | 0.39     | 0.50  | -0.60 | 1.37 |
| Jammu & Kashmir | ari      | Mothers age       | 20-30               | -0.45    | 0.52  | -1.41 | 0.61 |
| Jammu & Kashmir | ari      | Mothers age       | 30-40               | -0.26    | 0.56  | -1.32 | 0.87 |
| Jammu & Kashmir | ari      | Mothers age       | 40+                 | -1.42    | 1.51  | -4.89 | 1.00 |
| Jammu & Kashmir | ari      | Sex               | Female              | -0.24    | 0.25  | -0.75 | 0.25 |
| Jammu & Kashmir | ari      | Birth weight      | Average             | -0.04    | 0.44  | -0.84 | 0.85 |
| Jammu & Kashmir | ari      | Birth weight      | Below Average       | 0.38     | 0.54  | -0.65 | 1.46 |
| Jammu & Kashmir | ari      | Breastfed         | No                  | 0.29     | 0.28  | -0.27 | 0.84 |
| Jammu & Kashmir | ari      | Toilet            | Unimproved          | -0.37    | 0.33  | -1.01 | 0.27 |
| Jammu & Kashmir | ari      | Toilet            | Improved            | -0.44    | 0.41  | -1.28 | 0.32 |
| Jammu & Kashmir | ari      | Location          | Urban               | -0.68    | 0.42  | -1.53 | 0.10 |
| Jammu & Kashmir | ari      | Cookign fuel      | Solid               | -0.20    | 0.35  | -0.90 | 0.48 |
| Jammu & Kashmir | ari      | Household size    | 05-Oct              | -0.26    | 0.30  | -0.84 | 0.34 |
| Jammu & Kashmir | ari      | Household size    | 10+                 | -0.56    | 0.51  | -1.61 | 0.39 |
| Jammu & Kashmir | ari      | LLIN              | Yes                 | -0.01    | 2.85  | -6.77 | 4.63 |
| Jammu & Kashmir | ari      | Access            | Significant problem | 0.54     | 0.28  | -0.00 | 1.10 |
| Jammu & Kashmir | ari      | Vaccination       | -                   | -0.03    | 4.95  | -9.83 | 9.75 |

| Name            | Response | Group             | Level               | Estimate | Error | Ici    | uci   |
|-----------------|----------|-------------------|---------------------|----------|-------|--------|-------|
| Jammu & Kashmir | dia      | Intercept         | -                   | -1.98    | 3.61  | -9.02  | 4.98  |
| Jammu & Kashmir | dia      | Age               | 1-2                 | -0.16    | 0.33  | -0.80  | 0.51  |
| Jammu & Kashmir | dia      | Age               | 2-3                 | -0.61    | 0.35  | -1.29  | 0.06  |
| Jammu & Kashmir | dia      | Age               | 3-4                 | -1.25    | 0.41  | -2.04  | -0.46 |
| Jammu & Kashmir | dia      | Age               | 4-5                 | -1.03    | 0.39  | -1.77  | -0.26 |
| Jammu & Kashmir | dia      | Month             | March               | 0.02     | 0.35  | -0.66  | 0.72  |
| Jammu & Kashmir | dia      | Month             | April               | 0.33     | 0.35  | -0.33  | 1.03  |
| Jammu & Kashmir | dia      | Month             | May                 | 0.47     | 0.36  | -0.23  | 1.18  |
| Jammu & Kashmir | dia      | Month             | June                | -0.05    | 0.56  | -1.18  | 1.02  |
| Jammu & Kashmir | dia      | Month             | July                | 0.32     | 0.73  | -1.25  | 1.66  |
| Jammu & Kashmir | dia      | Month             | October             | -4.54    | 3.01  | -11.71 | -0.16 |
| Jammu & Kashmir | dia      | Month             | November            | -0.39    | 0.62  | -1.65  | 0.77  |
| Jammu & Kashmir | dia      | Wealth            | Poorer              | -0.27    | 0.39  | -1.02  | 0.48  |
| Jammu & Kashmir | dia      | Wealth            | Middle              | -0.84    | 0.44  | -1.71  | 0.02  |
| Jammu & Kashmir | dia      | Wealth            | Richer              | -0.96    | 0.48  | -1.91  | -0.02 |
| Jammu & Kashmir | dia      | Wealth            | Richest             | -0.89    | 0.54  | -1.95  | 0.19  |
| Jammu & Kashmir | dia      | Mothers education | Primary             | -0.21    | 0.47  | -1.19  | 0.67  |
| Jammu & Kashmir | dia      | Mothers education | Secondary           | -0.14    | 0.27  | -0.65  | 0.39  |
| Jammu & Kashmir | dia      | Mothers education | Higher              | -0.21    | 0.44  | -1.09  | 0.63  |
| Jammu & Kashmir | dia      | Mothers age       | 20-30               | 0.30     | 0.56  | -0.72  | 1.48  |
| Jammu & Kashmir | dia      | Mothers age       | 30-40               | 0.17     | 0.59  | -0.92  | 1.41  |
| Jammu & Kashmir | dia      | Mothers age       | 40+                 | 0.24     | 0.94  | -1.71  | 1.99  |
| Jammu & Kashmir | dia      | Sex               | Female              | 0.02     | 0.21  | -0.40  | 0.43  |
| Jammu & Kashmir | dia      | Birth weight      | Average             | 0.32     | 0.40  | -0.41  | 1.16  |
| Jammu & Kashmir | dia      | Birth weight      | Below Average       | 0.53     | 0.49  | -0.42  | 1.52  |
| Jammu & Kashmir | dia      | Breastfed         | No                  | 0.04     | 0.25  | -0.45  | 0.52  |
| Jammu & Kashmir | dia      | Toilet            | Unimproved          | -0.18    | 0.28  | -0.73  | 0.37  |
| Jammu & Kashmir | dia      | Toilet            | Improved            | -0.40    | 0.34  | -1.09  | 0.23  |
| Jammu & Kashmir | dia      | Location          | Urban               | -0.37    | 0.33  | -1.02  | 0.26  |
| Jammu & Kashmir | dia      | Cookign fuel      | Solid               | -0.34    | 0.31  | -0.94  | 0.28  |
| Jammu & Kashmir | dia      | Household size    | 05-Oct              | 0.20     | 0.28  | -0.33  | 0.76  |
| Jammu & Kashmir | dia      | Household size    | 10+                 | 0.30     | 0.40  | -0.51  | 1.06  |
| Jammu & Kashmir | dia      | LLIN              | Yes                 | -0.28    | 2.64  | -6.26  | 4.00  |
| Jammu & Kashmir | dia      | Access            | Significant problem | 0.37     | 0.24  | -0.10  | 0.83  |
| Jammu & Kashmir | dia      | Vaccination       | -                   | -0.00    | 5.05  | -9.82  | 9.83  |

| Name            | Response | Group             | Level               | Estimate | Error | lci   | uci   |
|-----------------|----------|-------------------|---------------------|----------|-------|-------|-------|
| Jammu & Kashmir | fever    | Intercept         | -                   | -0.68    | 3.54  | -7.66 | 6.15  |
| Jammu & Kashmir | fever    | Age               | 1-2                 | -0.07    | 0.28  | -0.60 | 0.49  |
| Jammu & Kashmir | fever    | Age               | 2-3                 | -0.31    | 0.28  | -0.88 | 0.25  |
| Jammu & Kashmir | fever    | Age               | 3-4                 | -0.57    | 0.31  | -1.17 | 0.02  |
| Jammu & Kashmir | fever    | Age               | 4-5                 | -0.72    | 0.31  | -1.33 | -0.11 |
| Jammu & Kashmir | fever    | Month             | March               | -0.16    | 0.26  | -0.67 | 0.34  |
| Jammu & Kashmir | fever    | Month             | April               | -0.02    | 0.27  | -0.54 | 0.49  |
| Jammu & Kashmir | fever    | Month             | May                 | -0.01    | 0.28  | -0.56 | 0.53  |
| Jammu & Kashmir | fever    | Month             | June                | -0.55    | 0.44  | -1.42 | 0.26  |
| Jammu & Kashmir | fever    | Month             | July                | 0.03     | 0.58  | -1.14 | 1.12  |
| Jammu & Kashmir | fever    | Month             | October             | -2.26    | 1.30  | -5.28 | -0.24 |
| Jammu & Kashmir | fever    | Month             | November            | -0.76    | 0.45  | -1.69 | 0.09  |
| Jammu & Kashmir | fever    | Wealth            | Poorer              | -0.05    | 0.34  | -0.72 | 0.64  |
| Jammu & Kashmir | fever    | Wealth            | Middle              | -0.17    | 0.36  | -0.91 | 0.53  |
| Jammu & Kashmir | fever    | Wealth            | Richer              | -0.34    | 0.40  | -1.13 | 0.42  |
| Jammu & Kashmir | fever    | Wealth            | Richest             | -0.64    | 0.45  | -1.52 | 0.24  |
| Jammu & Kashmir | fever    | Mothers education | Primary             | 0.09     | 0.35  | -0.63 | 0.75  |
| Jammu & Kashmir | fever    | Mothers education | Secondary           | -0.15    | 0.21  | -0.57 | 0.28  |
| Jammu & Kashmir | fever    | Mothers education | Higher              | 0.04     | 0.33  | -0.61 | 0.69  |
| Jammu & Kashmir | fever    | Mothers age       | 20-30               | -0.21    | 0.39  | -0.96 | 0.60  |
| Jammu & Kashmir | fever    | Mothers age       | 30-40               | -0.08    | 0.42  | -0.87 | 0.78  |
| Jammu & Kashmir | fever    | Mothers age       | 40+                 | -0.18    | 0.73  | -1.70 | 1.17  |
| Jammu & Kashmir | fever    | Sex               | Female              | -0.06    | 0.17  | -0.38 | 0.26  |
| Jammu & Kashmir | fever    | Birth weight      | Average             | 0.08     | 0.29  | -0.46 | 0.67  |
| Jammu & Kashmir | fever    | Birth weight      | Below Average       | 0.40     | 0.36  | -0.29 | 1.12  |
| Jammu & Kashmir | fever    | Breastfed         | No                  | -0.00    | 0.19  | -0.38 | 0.37  |
| Jammu & Kashmir | fever    | Toilet            | Unimproved          | -0.28    | 0.21  | -0.71 | 0.12  |
| Jammu & Kashmir | fever    | Toilet            | Improved            | -0.48    | 0.28  | -1.03 | 0.05  |
| Jammu & Kashmir | fever    | Location          | Urban               | -0.49    | 0.26  | -1.01 | -0.00 |
| Jammu & Kashmir | fever    | Cookign fuel      | Solid               | -0.22    | 0.24  | -0.67 | 0.25  |
| Jammu & Kashmir | fever    | Household size    | 05-Oct              | 0.10     | 0.21  | -0.30 | 0.53  |
| Jammu & Kashmir | fever    | Household size    | 10+                 | -0.05    | 0.33  | -0.70 | 0.59  |
| Jammu & Kashmir | fever    | LLIN              | Yes                 | 2.40     | 2.04  | -1.63 | 6.75  |
| Jammu & Kashmir | fever    | Access            | Significant problem | 0.07     | 0.18  | -0.29 | 0.43  |
| Jammu & Kashmir | fever    | Vaccination       | -                   | -0.05    | 5.03  | -9.63 | 9.82  |

| Name            | Response | Group             | Level               | Estimate | Error | lci   | uci   |
|-----------------|----------|-------------------|---------------------|----------|-------|-------|-------|
| Jammu & Kashmir | wasted   | Intercept         | -                   | -2.61    | 3.54  | -9.61 | 4.35  |
| Jammu & Kashmir | wasted   | Age               | 1-2                 | -0.38    | 0.30  | -0.96 | 0.21  |
| Jammu & Kashmir | wasted   | Age               | 2-3                 | -0.47    | 0.30  | -1.06 | 0.12  |
| Jammu & Kashmir | wasted   | Age               | 3-4                 | -0.72    | 0.33  | -1.37 | -0.07 |
| Jammu & Kashmir | wasted   | Age               | 4-5                 | -0.54    | 0.31  | -1.15 | 0.08  |
| Jammu & Kashmir | wasted   | Month             | March               | 0.55     | 0.30  | -0.02 | 1.14  |
| Jammu & Kashmir | wasted   | Month             | April               | 0.15     | 0.33  | -0.50 | 0.79  |
| Jammu & Kashmir | wasted   | Month             | May                 | 0.04     | 0.35  | -0.65 | 0.73  |
| Jammu & Kashmir | wasted   | Month             | June                | 0.09     | 0.50  | -0.94 | 1.04  |
| Jammu & Kashmir | wasted   | Month             | July                | -0.09    | 0.78  | -1.77 | 1.31  |
| Jammu & Kashmir | wasted   | Month             | October             | 1.12     | 0.54  | 0.02  | 2.16  |
| Jammu & Kashmir | wasted   | Month             | November            | 1.41     | 0.39  | 0.65  | 2.19  |
| Jammu & Kashmir | wasted   | Wealth            | Poorer              | -0.39    | 0.35  | -1.07 | 0.29  |
| Jammu & Kashmir | wasted   | Wealth            | Middle              | -0.54    | 0.38  | -1.27 | 0.21  |
| Jammu & Kashmir | wasted   | Wealth            | Richer              | -0.45    | 0.41  | -1.26 | 0.38  |
| Jammu & Kashmir | wasted   | Wealth            | Richest             | -0.22    | 0.46  | -1.12 | 0.70  |
| Jammu & Kashmir | wasted   | Mothers education | Primary             | -0.03    | 0.36  | -0.75 | 0.66  |
| Jammu & Kashmir | wasted   | Mothers education | Secondary           | -0.45    | 0.22  | -0.88 | 0.00  |
| Jammu & Kashmir | wasted   | Mothers education | Higher              | -0.61    | 0.35  | -1.32 | 0.06  |
| Jammu & Kashmir | wasted   | Mothers age       | 20-30               | 0.92     | 0.57  | -0.08 | 2.12  |
| Jammu & Kashmir | wasted   | Mothers age       | 30-40               | 0.67     | 0.59  | -0.39 | 1.91  |
| Jammu & Kashmir | wasted   | Mothers age       | 40+                 | 0.56     | 0.89  | -1.26 | 2.30  |
| Jammu & Kashmir | wasted   | Sex               | Female              | -0.02    | 0.17  | -0.35 | 0.32  |
| Jammu & Kashmir | wasted   | Birth weight      | Average             | 0.40     | 0.32  | -0.20 | 1.08  |
| Jammu & Kashmir | wasted   | Birth weight      | Below Average       | 0.36     | 0.41  | -0.43 | 1.18  |
| Jammu & Kashmir | wasted   | Breastfed         | No                  | -0.03    | 0.20  | -0.43 | 0.37  |
| Jammu & Kashmir | wasted   | Toilet            | Unimproved          | 0.06     | 0.22  | -0.38 | 0.50  |
| Jammu & Kashmir | wasted   | Toilet            | Improved            | 0.52     | 0.25  | 0.03  | 1.01  |
| Jammu & Kashmir | wasted   | Location          | Urban               | 0.30     | 0.24  | -0.18 | 0.77  |
| Jammu & Kashmir | wasted   | Cookign fuel      | Solid               | 0.18     | 0.27  | -0.35 | 0.70  |
| Jammu & Kashmir | wasted   | Household size    | 05-Oct              | -0.11    | 0.21  | -0.52 | 0.32  |
| Jammu & Kashmir | wasted   | Household size    | 10+                 | 0.08     | 0.33  | -0.57 | 0.72  |
| Jammu & Kashmir | wasted   | LLIN              | Yes                 | -1.55    | 3.09  | -8.66 | 3.33  |
| Jammu & Kashmir | wasted   | Access            | Significant problem | -0.27    | 0.19  | -0.64 | 0.11  |
| Jammu & Kashmir | wasted   | Vaccination       | -                   | -0.01    | 4.99  | -9.93 | 9.79  |

| Name      | Response | Group             | Level               | Estimate | Error | Ici    | uci   |
|-----------|----------|-------------------|---------------------|----------|-------|--------|-------|
| Jharkhand | ari      | Intercept         | -                   | -4.09    | 3.09  | -10.06 | 2.01  |
| Jharkhand | ari      | Age               | 1-2                 | -0.19    | 0.28  | -0.72  | 0.36  |
| Jharkhand | ari      | Age               | 2-3                 | -0.40    | 0.29  | -0.96  | 0.17  |
| Jharkhand | ari      | Age               | 3-4                 | -0.56    | 0.30  | -1.15  | 0.04  |
| Jharkhand | ari      | Age               | 4-5                 | -0.68    | 0.32  | -1.30  | -0.04 |
| Jharkhand | ari      | Month             | May                 | -1.02    | 0.45  | -1.92  | -0.18 |
| Jharkhand | ari      | Month             | June                | -1.41    | 0.52  | -2.50  | -0.44 |
| Jharkhand | ari      | Month             | July                | -0.58    | 0.39  | -1.35  | 0.16  |
| Jharkhand | ari      | Month             | August              | -0.88    | 0.37  | -1.60  | -0.17 |
| Jharkhand | ari      | Month             | September           | 0.38     | 0.30  | -0.19  | 0.98  |
| Jharkhand | ari      | Month             | October             | -0.01    | 0.32  | -0.62  | 0.63  |
| Jharkhand | ari      | Month             | November            | -0.24    | 0.72  | -1.74  | 1.07  |
| Jharkhand | ari      | Wealth            | Poorer              | 0.16     | 0.23  | -0.29  | 0.61  |
| Jharkhand | ari      | Wealth            | Middle              | 0.40     | 0.29  | -0.18  | 0.98  |
| Jharkhand | ari      | Wealth            | Richer              | 0.66     | 0.42  | -0.17  | 1.49  |
| Jharkhand | ari      | Wealth            | Richest             | -0.16    | 0.65  | -1.47  | 1.09  |
| Jharkhand | ari      | Mothers education | Primary             | 0.09     | 0.26  | -0.42  | 0.59  |
| Jharkhand | ari      | Mothers education | Secondary           | -0.00    | 0.22  | -0.43  | 0.42  |
| Jharkhand | ari      | Mothers education | Higher              | 0.25     | 0.42  | -0.60  | 1.07  |
| Jharkhand | ari      | Mothers age       | 20-30               | 0.04     | 0.25  | -0.43  | 0.55  |
| Jharkhand | ari      | Mothers age       | 30-40               | -0.14    | 0.36  | -0.83  | 0.55  |
| Jharkhand | ari      | Mothers age       | 40+                 | -0.36    | 1.02  | -2.64  | 1.33  |
| Jharkhand | ari      | Sex               | Female              | -0.34    | 0.17  | -0.66  | -0.01 |
| Jharkhand | ari      | Birth weight      | Average             | 0.45     | 0.29  | -0.10  | 1.03  |
| Jharkhand | ari      | Birth weight      | Below Average       | 1.21     | 0.35  | 0.54   | 1.91  |
| Jharkhand | ari      | Breastfed         | No                  | -0.22    | 0.19  | -0.60  | 0.15  |
| Jharkhand | ari      | Toilet            | Unimproved          | -0.07    | 0.27  | -0.59  | 0.46  |
| Jharkhand | ari      | Toilet            | Improved            | 0.03     | 0.20  | -0.37  | 0.42  |
| Jharkhand | ari      | Location          | Urban               | -0.02    | 0.28  | -0.58  | 0.51  |
| Jharkhand | ari      | Cookign fuel      | Solid               | -0.08    | 0.34  | -0.74  | 0.61  |
| Jharkhand | ari      | Household size    | 05-Oct              | 0.15     | 0.21  | -0.26  | 0.57  |
| Jharkhand | ari      | Household size    | 10+                 | 0.25     | 0.29  | -0.34  | 0.81  |
| Jharkhand | ari      | LLIN              | Yes                 | -1.11    | 0.67  | -2.56  | 0.06  |
| Jharkhand | ari      | Access            | Significant problem | 0.36     | 0.19  | -0.00  | 0.73  |
| Jharkhand | ari      | Vaccination       | -                   | 0.02     | 4.98  | -9.95  | 9.70  |

| Name      | Response | Group             | Level               | Estimate | Error | Ici   | uci   |
|-----------|----------|-------------------|---------------------|----------|-------|-------|-------|
| Jharkhand | dia      | Intercept         | -                   | -1.30    | 3.07  | -7.28 | 4.71  |
| Jharkhand | dia      | Age               | 1-2                 | -0.17    | 0.17  | -0.50 | 0.15  |
| Jharkhand | dia      | Age               | 2-3                 | -0.92    | 0.19  | -1.28 | -0.55 |
| Jharkhand | dia      | Age               | 3-4                 | -1.27    | 0.21  | -1.68 | -0.86 |
| Jharkhand | dia      | Age               | 4-5                 | -1.38    | 0.22  | -1.81 | -0.95 |
| Jharkhand | dia      | Month             | May                 | -0.75    | 0.23  | -1.21 | -0.30 |
| Jharkhand | dia      | Month             | June                | -0.99    | 0.25  | -1.51 | -0.51 |
| Jharkhand | dia      | Month             | July                | -0.42    | 0.22  | -0.85 | 0.00  |
| Jharkhand | dia      | Month             | August              | -1.08    | 0.23  | -1.52 | -0.64 |
| Jharkhand | dia      | Month             | September           | -1.19    | 0.22  | -1.64 | -0.76 |
| Jharkhand | dia      | Month             | October             | -1.33    | 0.24  | -1.80 | -0.88 |
| Jharkhand | dia      | Month             | November            | -0.68    | 0.48  | -1.67 | 0.19  |
| Jharkhand | dia      | Wealth            | Poorer              | 0.12     | 0.16  | -0.19 | 0.44  |
| Jharkhand | dia      | Wealth            | Middle              | -0.01    | 0.23  | -0.46 | 0.43  |
| Jharkhand | dia      | Wealth            | Richer              | 0.02     | 0.35  | -0.67 | 0.69  |
| Jharkhand | dia      | Wealth            | Richest             | -0.08    | 0.46  | -0.99 | 0.81  |
| Jharkhand | dia      | Mothers education | Primary             | 0.04     | 0.18  | -0.31 | 0.39  |
| Jharkhand | dia      | Mothers education | Secondary           | -0.18    | 0.14  | -0.46 | 0.10  |
| Jharkhand | dia      | Mothers education | Higher              | 0.10     | 0.29  | -0.49 | 0.64  |
| Jharkhand | dia      | Mothers age       | 20-30               | 0.09     | 0.17  | -0.24 | 0.44  |
| Jharkhand | dia      | Mothers age       | 30-40               | -0.17    | 0.24  | -0.64 | 0.30  |
| Jharkhand | dia      | Mothers age       | 40+                 | 0.51     | 0.52  | -0.60 | 1.47  |
| Jharkhand | dia      | Sex               | Female              | -0.14    | 0.11  | -0.36 | 0.09  |
| Jharkhand | dia      | Birth weight      | Average             | -0.19    | 0.16  | -0.51 | 0.13  |
| Jharkhand | dia      | Birth weight      | Below Average       | 0.31     | 0.22  | -0.12 | 0.74  |
| Jharkhand | dia      | Breastfed         | No                  | -0.18    | 0.13  | -0.44 | 0.08  |
| Jharkhand | dia      | Toilet            | Unimproved          | 0.01     | 0.20  | -0.38 | 0.40  |
| Jharkhand | dia      | Toilet            | Improved            | -0.07    | 0.14  | -0.35 | 0.20  |
| Jharkhand | dia      | Location          | Urban               | -0.01    | 0.21  | -0.42 | 0.41  |
| Jharkhand | dia      | Cookign fuel      | Solid               | -0.18    | 0.27  | -0.71 | 0.37  |
| Jharkhand | dia      | Household size    | 05-Oct              | 0.08     | 0.14  | -0.19 | 0.35  |
| Jharkhand | dia      | Household size    | 10+                 | 0.06     | 0.20  | -0.34 | 0.46  |
| Jharkhand | dia      | LLIN              | Yes                 | -0.45    | 0.40  | -1.28 | 0.30  |
| Jharkhand | dia      | Access            | Significant problem | 0.37     | 0.13  | 0.13  | 0.62  |
| Jharkhand | dia      | Vaccination       | -                   | -0.03    | 5.00  | -9.85 | 9.65  |



| Name      | Response | Group             | Level               | Estimate | Error | Ici   | uci   |
|-----------|----------|-------------------|---------------------|----------|-------|-------|-------|
| Jharkhand | fever    | Intercept         | -                   | -1.17    | 3.07  | -7.25 | 4.69  |
| Jharkhand | fever    | Age               | 1-2                 | -0.19    | 0.14  | -0.47 | 0.09  |
| Jharkhand | fever    | Age               | 2-3                 | -0.65    | 0.15  | -0.95 | -0.35 |
| Jharkhand | fever    | Age               | 3-4                 | -0.84    | 0.16  | -1.15 | -0.52 |
| Jharkhand | fever    | Age               | 4-5                 | -1.06    | 0.17  | -1.40 | -0.72 |
| Jharkhand | fever    | Month             | May                 | -0.40    | 0.21  | -0.80 | 0.01  |
| Jharkhand | fever    | Month             | June                | -1.15    | 0.25  | -1.64 | -0.66 |
| Jharkhand | fever    | Month             | July                | -0.19    | 0.20  | -0.59 | 0.20  |
| Jharkhand | fever    | Month             | August              | -0.24    | 0.19  | -0.62 | 0.13  |
| Jharkhand | fever    | Month             | September           | -0.16    | 0.18  | -0.52 | 0.20  |
| Jharkhand | fever    | Month             | October             | -0.36    | 0.19  | -0.73 | 0.01  |
| Jharkhand | fever    | Month             | November            | -0.82    | 0.48  | -1.80 | 0.08  |
| Jharkhand | fever    | Wealth            | Poorer              | 0.20     | 0.13  | -0.05 | 0.45  |
| Jharkhand | fever    | Wealth            | Middle              | 0.42     | 0.16  | 0.10  | 0.74  |
| Jharkhand | fever    | Wealth            | Richer              | 0.56     | 0.24  | 0.09  | 1.02  |
| Jharkhand | fever    | Wealth            | Richest             | 0.17     | 0.33  | -0.46 | 0.81  |
| Jharkhand | fever    | Mothers education | Primary             | 0.01     | 0.14  | -0.27 | 0.28  |
| Jharkhand | fever    | Mothers education | Secondary           | -0.08    | 0.12  | -0.31 | 0.15  |
| Jharkhand | fever    | Mothers education | Higher              | -0.15    | 0.22  | -0.60 | 0.28  |
| Jharkhand | fever    | Mothers age       | 20-30               | -0.04    | 0.13  | -0.29 | 0.22  |
| Jharkhand | fever    | Mothers age       | 30-40               | -0.17    | 0.18  | -0.52 | 0.18  |
| Jharkhand | fever    | Mothers age       | 40+                 | 0.15     | 0.46  | -0.80 | 1.01  |
| Jharkhand | fever    | Sex               | Female              | -0.16    | 0.09  | -0.34 | 0.01  |
| Jharkhand | fever    | Birth weight      | Average             | -0.03    | 0.13  | -0.29 | 0.23  |
| Jharkhand | fever    | Birth weight      | Below Average       | 0.40     | 0.18  | 0.06  | 0.75  |
| Jharkhand | fever    | Breastfed         | No                  | 0.00     | 0.10  | -0.19 | 0.20  |
| Jharkhand | fever    | Toilet            | Unimproved          | -0.16    | 0.14  | -0.44 | 0.13  |
| Jharkhand | fever    | Toilet            | Improved            | 0.06     | 0.11  | -0.16 | 0.27  |
| Jharkhand | fever    | Location          | Urban               | 0.15     | 0.15  | -0.14 | 0.44  |
| Jharkhand | fever    | Cookign fuel      | Solid               | -0.17    | 0.19  | -0.54 | 0.20  |
| Jharkhand | fever    | Household size    | 05-Oct              | -0.02    | 0.11  | -0.23 | 0.19  |
| Jharkhand | fever    | Household size    | 10+                 | -0.31    | 0.16  | -0.64 | 0.01  |
| Jharkhand | fever    | LLIN              | Yes                 | -0.37    | 0.28  | -0.95 | 0.16  |
| Jharkhand | fever    | Access            | Significant problem | 0.17     | 0.10  | -0.02 | 0.36  |
| Jharkhand | fever    | Vaccination       | -                   | -0.01    | 5.01  | -9.69 | 9.87  |

| Name      | Response | Group             | Level               | Estimate | Error | Ici    | uci   |
|-----------|----------|-------------------|---------------------|----------|-------|--------|-------|
| Jharkhand | wasted   | Intercept         | -                   | -0.83    | 3.07  | -7.01  | 5.27  |
| Jharkhand | wasted   | Age               | 1-2                 | -0.24    | 0.11  | -0.45  | -0.02 |
| Jharkhand | wasted   | Age               | 2-3                 | -0.37    | 0.11  | -0.59  | -0.15 |
| Jharkhand | wasted   | Age               | 3-4                 | -0.67    | 0.12  | -0.91  | -0.43 |
| Jharkhand | wasted   | Age               | 4-5                 | -0.42    | 0.12  | -0.66  | -0.19 |
| Jharkhand | wasted   | Month             | May                 | 0.18     | 0.14  | -0.09  | 0.45  |
| Jharkhand | wasted   | Month             | June                | 0.34     | 0.14  | 0.07   | 0.61  |
| Jharkhand | wasted   | Month             | July                | 0.56     | 0.13  | 0.29   | 0.82  |
| Jharkhand | wasted   | Month             | August              | 0.25     | 0.13  | -0.00  | 0.49  |
| Jharkhand | wasted   | Month             | September           | -0.01    | 0.12  | -0.25  | 0.22  |
| Jharkhand | wasted   | Month             | October             | 0.10     | 0.12  | -0.14  | 0.35  |
| Jharkhand | wasted   | Month             | November            | -0.58    | 0.32  | -1.22  | 0.04  |
| Jharkhand | wasted   | Wealth            | Poorer              | -0.19    | 0.09  | -0.36  | -0.01 |
| Jharkhand | wasted   | Wealth            | Middle              | -0.44    | 0.12  | -0.68  | -0.20 |
| Jharkhand | wasted   | Wealth            | Richer              | -0.09    | 0.19  | -0.46  | 0.27  |
| Jharkhand | wasted   | Wealth            | Richest             | -0.37    | 0.26  | -0.86  | 0.14  |
| Jharkhand | wasted   | Mothers education | Primary             | -0.10    | 0.10  | -0.30  | 0.09  |
| Jharkhand | wasted   | Mothers education | Secondary           | -0.12    | 0.08  | -0.28  | 0.04  |
| Jharkhand | wasted   | Mothers education | Higher              | -0.01    | 0.17  | -0.35  | 0.31  |
| Jharkhand | wasted   | Mothers age       | 20-30               | 0.03     | 0.10  | -0.15  | 0.22  |
| Jharkhand | wasted   | Mothers age       | 30-40               | 0.10     | 0.13  | -0.15  | 0.36  |
| Jharkhand | wasted   | Mothers age       | 40+                 | 0.16     | 0.31  | -0.44  | 0.75  |
| Jharkhand | wasted   | Sex               | Female              | -0.13    | 0.06  | -0.26  | -0.00 |
| Jharkhand | wasted   | Birth weight      | Average             | -0.01    | 0.09  | -0.19  | 0.17  |
| Jharkhand | wasted   | Birth weight      | Below Average       | 0.34     | 0.13  | 0.09   | 0.60  |
| Jharkhand | wasted   | Breastfed         | No                  | -0.18    | 0.07  | -0.32  | -0.04 |
| Jharkhand | wasted   | Toilet            | Unimproved          | 0.19     | 0.11  | -0.02  | 0.41  |
| Jharkhand | wasted   | Toilet            | Improved            | 0.04     | 0.08  | -0.11  | 0.18  |
| Jharkhand | wasted   | Location          | Urban               | 0.18     | 0.11  | -0.04  | 0.39  |
| Jharkhand | wasted   | Cookign fuel      | Solid               | 0.21     | 0.15  | -0.09  | 0.51  |
| Jharkhand | wasted   | Household size    | 05-Oct              | -0.11    | 0.08  | -0.26  | 0.04  |
| Jharkhand | wasted   | Household size    | 10+                 | -0.05    | 0.11  | -0.27  | 0.17  |
| Jharkhand | wasted   | LLIN              | Yes                 | -0.16    | 0.20  | -0.57  | 0.23  |
| Jharkhand | wasted   | Access            | Significant problem | 0.06     | 0.07  | -0.08  | 0.19  |
| Jharkhand | wasted   | Vaccination       | -                   | -0.01    | 5.03  | -10.00 | 10.01 |

| Name      | Response | Group             | Level               | Estimate | Error | Ici    | uci   |
|-----------|----------|-------------------|---------------------|----------|-------|--------|-------|
| Karnataka | ari      | Intercept         | -                   | -9.60    | 3.57  | -16.73 | -2.72 |
| Karnataka | ari      | Age               | 1-2                 | -0.50    | 0.46  | -1.38  | 0.40  |
| Karnataka | ari      | Age               | 2-3                 | -0.83    | 0.49  | -1.79  | 0.15  |
| Karnataka | ari      | Age               | 3-4                 | -0.64    | 0.50  | -1.63  | 0.33  |
| Karnataka | ari      | Age               | 4-5                 | -0.22    | 0.48  | -1.16  | 0.74  |
| Karnataka | ari      | Month             | March               | 3.04     | 1.64  | 0.11   | 6.50  |
| Karnataka | ari      | Month             | April               | 0.80     | 1.71  | -2.25  | 4.40  |
| Karnataka | ari      | Month             | May                 | 1.94     | 1.69  | -1.12  | 5.45  |
| Karnataka | ari      | Month             | June                | 1.90     | 1.68  | -1.11  | 5.43  |
| Karnataka | ari      | Month             | July                | 1.14     | 1.79  | -2.12  | 4.88  |
| Karnataka | ari      | Wealth            | Poorer              | -0.04    | 0.72  | -1.41  | 1.42  |
| Karnataka | ari      | Wealth            | Middle              | -0.05    | 0.73  | -1.45  | 1.41  |
| Karnataka | ari      | Wealth            | Richer              | 0.55     | 0.81  | -1.02  | 2.16  |
| Karnataka | ari      | Wealth            | Richest             | -0.52    | 0.99  | -2.48  | 1.39  |
| Karnataka | ari      | Mothers education | Primary             | 0.21     | 0.70  | -1.16  | 1.62  |
| Karnataka | ari      | Mothers education | Secondary           | 0.29     | 0.56  | -0.78  | 1.45  |
| Karnataka | ari      | Mothers education | Higher              | 1.06     | 0.70  | -0.29  | 2.46  |
| Karnataka | ari      | Mothers age       | 20-30               | 0.25     | 0.47  | -0.64  | 1.20  |
| Karnataka | ari      | Mothers age       | 30-40               | 0.09     | 0.62  | -1.12  | 1.30  |
| Karnataka | ari      | Sex               | Female              | -0.18    | 0.28  | -0.72  | 0.37  |
| Karnataka | ari      | Birth weight      | Average             | -0.64    | 0.32  | -1.27  | -0.02 |
| Karnataka | ari      | Birth weight      | Below Average       | -1.77    | 0.75  | -3.37  | -0.40 |
| Karnataka | ari      | Breastfed         | No                  | -0.57    | 0.33  | -1.23  | 0.05  |
| Karnataka | ari      | Toilet            | Unimproved          | -0.48    | 0.43  | -1.35  | 0.36  |
| Karnataka | ari      | Toilet            | Improved            | 1.02     | 0.55  | -0.07  | 2.08  |
| Karnataka | ari      | Location          | Urban               | -0.28    | 0.52  | -1.35  | 0.74  |
| Karnataka | ari      | Cookign fuel      | Solid               | 0.43     | 0.44  | -0.42  | 1.29  |
| Karnataka | ari      | Household size    | 05-Oct              | -0.66    | 0.34  | -1.34  | 0.00  |
| Karnataka | ari      | Household size    | 10+                 | -0.34    | 0.49  | -1.30  | 0.61  |
| Karnataka | ari      | LLIN              | Yes                 | 1.33     | 0.58  | 0.19   | 2.46  |
| Karnataka | ari      | Access            | Significant problem | 0.99     | 0.36  | 0.31   | 1.70  |
| Karnataka | ari      | Vaccination       | -                   | -0.00    | 4.97  | -9.75  | 9.75  |

| Name              | Response | Group             | Level               | Estimate | Error | Ici    | uci   |
|-------------------|----------|-------------------|---------------------|----------|-------|--------|-------|
| Arunachal Pradesh | ari      | Intercept         | -                   | -12.78   | 5.33  | -23.59 | -2.79 |
| Arunachal Pradesh | ari      | Age               | 1-2                 | 1.58     | 2.45  | -3.17  | 6.46  |
| Arunachal Pradesh | ari      | Age               | 2-3                 | -0.07    | 2.62  | -5.39  | 5.05  |
| Arunachal Pradesh | ari      | Age               | 3-4                 | 0.33     | 2.52  | -4.67  | 5.26  |
| Arunachal Pradesh | ari      | Age               | 4-5                 | 0.01     | 2.58  | -5.10  | 5.04  |
| Arunachal Pradesh | ari      | Month             | May                 | -0.09    | 2.81  | -5.92  | 5.23  |
| Arunachal Pradesh | ari      | Month             | June                | -0.90    | 4.41  | -10.12 | 7.14  |
| Arunachal Pradesh | ari      | Month             | August              | -0.60    | 2.96  | -6.90  | 4.86  |
| Arunachal Pradesh | ari      | Month             | September           | 1.48     | 2.64  | -3.99  | 6.49  |
| Arunachal Pradesh | ari      | Month             | October             | 1.39     | 2.51  | -3.70  | 6.21  |
| Arunachal Pradesh | ari      | Month             | November            | 1.86     | 2.49  | -3.00  | 6.71  |
| Arunachal Pradesh | ari      | Wealth            | Poorer              | -0.04    | 2.29  | -4.74  | 4.32  |
| Arunachal Pradesh | ari      | Wealth            | Middle              | 0.93     | 2.28  | -3.66  | 5.31  |
| Arunachal Pradesh | ari      | Wealth            | Richer              | 0.13     | 2.81  | -5.56  | 5.49  |
| Arunachal Pradesh | ari      | Wealth            | Richest             | -1.28    | 3.66  | -8.83  | 5.47  |
| Arunachal Pradesh | ari      | Mothers education | Primary             | -0.13    | 2.50  | -5.47  | 4.42  |
| Arunachal Pradesh | ari      | Mothers education | Secondary           | 0.18     | 1.93  | -3.56  | 4.08  |
| Arunachal Pradesh | ari      | Mothers education | Higher              | -0.35    | 3.34  | -7.43  | 5.78  |
| Arunachal Pradesh | ari      | Mothers age       | 20-30               | 1.85     | 2.48  | -2.53  | 7.11  |
| Arunachal Pradesh | ari      | Mothers age       | 30-40               | 1.14     | 2.81  | -4.39  | 6.79  |
| Arunachal Pradesh | ari      | Mothers age       | 40+                 | -0.48    | 4.18  | -9.12  | 7.17  |
| Arunachal Pradesh | ari      | Sex               | Female              | 0.29     | 1.64  | -2.98  | 3.54  |
| Arunachal Pradesh | ari      | Birth weight      | Average             | 1.94     | 2.44  | -2.32  | 7.25  |
| Arunachal Pradesh | ari      | Birth weight      | Below Average       | -1.15    | 3.39  | -8.23  | 5.13  |
| Arunachal Pradesh | ari      | Breastfed         | No                  | 1.56     | 1.78  | -1.88  | 5.13  |
| Arunachal Pradesh | ari      | Toilet            | Unimproved          | 1.46     | 1.92  | -2.38  | 5.21  |
| Arunachal Pradesh | ari      | Toilet            | Improved            | 0.11     | 2.18  | -4.57  | 4.06  |
| Arunachal Pradesh | ari      | Location          | Urban               | -2.19    | 2.50  | -7.67  | 2.30  |
| Arunachal Pradesh | ari      | Cookign fuel      | Solid               | -1.34    | 2.20  | -5.67  | 2.92  |
| Arunachal Pradesh | ari      | Household size    | 05-Oct              | -0.91    | 1.71  | -4.27  | 2.50  |
| Arunachal Pradesh | ari      | Household size    | 10+                 | -1.02    | 3.27  | -8.08  | 4.85  |
| Arunachal Pradesh | ari      | LLIN              | Yes                 | -0.80    | 1.83  | -4.60  | 2.59  |
| Arunachal Pradesh | ari      | Access            | Significant problem | -0.56    | 1.70  | -3.92  | 2.82  |
| Arunachal Pradesh | ari      | Vaccination       | -                   | 0.03     | 5.01  | -9.98  | 9.71  |

| Name      | Response | Group             | Level               | Estimate | Error | lci   | uci   |
|-----------|----------|-------------------|---------------------|----------|-------|-------|-------|
| Karnataka | dia      | Intercept         | -                   | -2.99    | 3.00  | -8.89 | 2.83  |
| Karnataka | dia      | Age               | 1-2                 | -0.02    | 0.22  | -0.45 | 0.40  |
| Karnataka | dia      | Age               | 2-3                 | -0.64    | 0.23  | -1.10 | -0.18 |
| Karnataka | dia      | Age               | 3-4                 | -1.30    | 0.26  | -1.80 | -0.79 |
| Karnataka | dia      | Age               | 4-5                 | -1.09    | 0.26  | -1.61 | -0.58 |
| Karnataka | dia      | Month             | March               | 0.31     | 0.64  | -0.89 | 1.59  |
| Karnataka | dia      | Month             | April               | -0.40    | 0.65  | -1.65 | 0.92  |
| Karnataka | dia      | Month             | May                 | -0.01    | 0.66  | -1.26 | 1.31  |
| Karnataka | dia      | Month             | June                | -0.72    | 0.65  | -1.96 | 0.60  |
| Karnataka | dia      | Month             | July                | -1.79    | 0.72  | -3.19 | -0.34 |
| Karnataka | dia      | Wealth            | Poorer              | 0.21     | 0.33  | -0.41 | 0.86  |
| Karnataka | dia      | Wealth            | Middle              | 0.05     | 0.33  | -0.59 | 0.71  |
| Karnataka | dia      | Wealth            | Richer              | 0.35     | 0.40  | -0.41 | 1.14  |
| Karnataka | dia      | Wealth            | Richest             | 0.24     | 0.46  | -0.64 | 1.15  |
| Karnataka | dia      | Mothers education | Primary             | -0.45    | 0.29  | -1.03 | 0.10  |
| Karnataka | dia      | Mothers education | Secondary           | -0.38    | 0.21  | -0.80 | 0.03  |
| Karnataka | dia      | Mothers education | Higher              | -1.65    | 0.36  | -2.37 | -0.95 |
| Karnataka | dia      | Mothers age       | 20-30               | 0.22     | 0.24  | -0.25 | 0.71  |
| Karnataka | dia      | Mothers age       | 30-40               | -0.48    | 0.34  | -1.16 | 0.18  |
| Karnataka | dia      | Sex               | Female              | -0.19    | 0.14  | -0.46 | 0.07  |
| Karnataka | dia      | Birth weight      | Average             | -0.14    | 0.16  | -0.46 | 0.17  |
| Karnataka | dia      | Birth weight      | Below Average       | -0.67    | 0.33  | -1.35 | -0.04 |
| Karnataka | dia      | Breastfed         | No                  | -0.09    | 0.16  | -0.40 | 0.22  |
| Karnataka | dia      | Toilet            | Unimproved          | -0.07    | 0.20  | -0.46 | 0.33  |
| Karnataka | dia      | Toilet            | Improved            | -0.45    | 0.38  | -1.22 | 0.26  |
| Karnataka | dia      | Location          | Urban               | 0.12     | 0.24  | -0.34 | 0.59  |
| Karnataka | dia      | Cookign fuel      | Solid               | 0.20     | 0.23  | -0.25 | 0.65  |
| Karnataka | dia      | Household size    | 05-Oct              | -0.28    | 0.16  | -0.60 | 0.04  |
| Karnataka | dia      | Household size    | 10+                 | -0.55    | 0.26  | -1.06 | -0.05 |
| Karnataka | dia      | LLIN              | Yes                 | 0.72     | 0.30  | 0.11  | 1.31  |
| Karnataka | dia      | Access            | Significant problem | 0.38     | 0.17  | 0.04  | 0.71  |
| Karnataka | dia      | Vaccination       | -                   | -0.05    | 4.99  | -9.78 | 9.67  |

| Name      | Response | Group             | Level               | Estimate | Error | lci   | uci   |
|-----------|----------|-------------------|---------------------|----------|-------|-------|-------|
| Karnataka | fever    | Intercept         | -                   | -1.81    | 2.97  | -7.70 | 4.03  |
| Karnataka | fever    | Age               | 1-2                 | 0.12     | 0.19  | -0.25 | 0.47  |
| Karnataka | fever    | Age               | 2-3                 | -0.20    | 0.20  | -0.59 | 0.17  |
| Karnataka | fever    | Age               | 3-4                 | -0.15    | 0.20  | -0.54 | 0.24  |
| Karnataka | fever    | Age               | 4-5                 | -0.21    | 0.20  | -0.61 | 0.19  |
| Karnataka | fever    | Month             | March               | 0.31     | 0.43  | -0.53 | 1.16  |
| Karnataka | fever    | Month             | April               | -0.92    | 0.46  | -1.80 | 0.01  |
| Karnataka | fever    | Month             | May                 | -0.71    | 0.46  | -1.62 | 0.21  |
| Karnataka | fever    | Month             | June                | -0.60    | 0.46  | -1.48 | 0.29  |
| Karnataka | fever    | Month             | July                | -1.19    | 0.50  | -2.15 | -0.20 |
| Karnataka | fever    | Wealth            | Poorer              | -0.91    | 0.25  | -1.40 | -0.41 |
| Karnataka | fever    | Wealth            | Middle              | -0.48    | 0.25  | -0.97 | 0.02  |
| Karnataka | fever    | Wealth            | Richer              | -0.30    | 0.30  | -0.89 | 0.28  |
| Karnataka | fever    | Wealth            | Richest             | -0.41    | 0.35  | -1.09 | 0.27  |
| Karnataka | fever    | Mothers education | Primary             | 0.02     | 0.25  | -0.46 | 0.50  |
| Karnataka | fever    | Mothers education | Secondary           | 0.29     | 0.20  | -0.09 | 0.69  |
| Karnataka | fever    | Mothers education | Higher              | 0.17     | 0.28  | -0.36 | 0.71  |
| Karnataka | fever    | Mothers age       | 20-30               | -0.27    | 0.17  | -0.60 | 0.07  |
| Karnataka | fever    | Mothers age       | 30-40               | -0.29    | 0.24  | -0.76 | 0.17  |
| Karnataka | fever    | Sex               | Female              | -0.20    | 0.11  | -0.41 | 0.01  |
| Karnataka | fever    | Birth weight      | Average             | -0.26    | 0.12  | -0.49 | -0.03 |
| Karnataka | fever    | Birth weight      | Below Average       | 0.22     | 0.20  | -0.18 | 0.63  |
| Karnataka | fever    | Breastfed         | No                  | -0.49    | 0.12  | -0.74 | -0.25 |
| Karnataka | fever    | Toilet            | Unimproved          | -0.35    | 0.16  | -0.66 | -0.04 |
| Karnataka | fever    | Toilet            | Improved            | 0.55     | 0.22  | 0.10  | 0.98  |
| Karnataka | fever    | Location          | Urban               | -0.24    | 0.18  | -0.59 | 0.13  |
| Karnataka | fever    | Cookign fuel      | Solid               | 0.40     | 0.16  | 0.08  | 0.71  |
| Karnataka | fever    | Household size    | 05-Oct              | -0.07    | 0.14  | -0.33 | 0.19  |
| Karnataka | fever    | Household size    | 10+                 | -0.07    | 0.19  | -0.45 | 0.31  |
| Karnataka | fever    | LLIN              | Yes                 | 0.82     | 0.23  | 0.36  | 1.26  |
| Karnataka | fever    | Access            | Significant problem | 0.06     | 0.13  | -0.20 | 0.31  |
| Karnataka | fever    | Vaccination       | -                   | -0.02    | 5.00  | -9.84 | 9.87  |

| Name      | Response | Group             | Level               | Estimate | Error | lci   | uci   |
|-----------|----------|-------------------|---------------------|----------|-------|-------|-------|
| Karnataka | wasted   | Intercept         | -                   | -1.60    | 2.89  | -7.07 | 4.01  |
| Karnataka | wasted   | Age               | 1-2                 | -0.19    | 0.11  | -0.41 | 0.04  |
| Karnataka | wasted   | Age               | 2-3                 | -0.13    | 0.11  | -0.35 | 0.10  |
| Karnataka | wasted   | Age               | 3-4                 | -0.19    | 0.12  | -0.44 | 0.04  |
| Karnataka | wasted   | Age               | 4-5                 | 0.11     | 0.12  | -0.12 | 0.34  |
| Karnataka | wasted   | Month             | March               | 0.08     | 0.33  | -0.55 | 0.75  |
| Karnataka | wasted   | Month             | April               | 0.36     | 0.33  | -0.28 | 1.01  |
| Karnataka | wasted   | Month             | May                 | 0.60     | 0.33  | -0.05 | 1.27  |
| Karnataka | wasted   | Month             | June                | 0.80     | 0.33  | 0.17  | 1.47  |
| Karnataka | wasted   | Month             | July                | 0.82     | 0.34  | 0.16  | 1.51  |
| Karnataka | wasted   | Wealth            | Poorer              | -0.02    | 0.14  | -0.30 | 0.27  |
| Karnataka | wasted   | Wealth            | Middle              | -0.11    | 0.15  | -0.40 | 0.19  |
| Karnataka | wasted   | Wealth            | Richer              | -0.02    | 0.19  | -0.38 | 0.34  |
| Karnataka | wasted   | Wealth            | Richest             | 0.03     | 0.21  | -0.39 | 0.45  |
| Karnataka | wasted   | Mothers education | Primary             | -0.26    | 0.12  | -0.50 | -0.01 |
| Karnataka | wasted   | Mothers education | Secondary           | -0.17    | 0.10  | -0.37 | 0.02  |
| Karnataka | wasted   | Mothers education | Higher              | -0.67    | 0.15  | -0.97 | -0.37 |
| Karnataka | wasted   | Mothers age       | 20-30               | 0.01     | 0.11  | -0.21 | 0.22  |
| Karnataka | wasted   | Mothers age       | 30-40               | -0.03    | 0.15  | -0.33 | 0.26  |
| Karnataka | wasted   | Sex               | Female              | -0.08    | 0.06  | -0.20 | 0.04  |
| Karnataka | wasted   | Birth weight      | Average             | -0.14    | 0.07  | -0.28 | 0.00  |
| Karnataka | wasted   | Birth weight      | Below Average       | -0.09    | 0.13  | -0.35 | 0.17  |
| Karnataka | wasted   | Breastfed         | No                  | -0.12    | 0.07  | -0.26 | 0.02  |
| Karnataka | wasted   | Toilet            | Unimproved          | -0.08    | 0.10  | -0.27 | 0.12  |
| Karnataka | wasted   | Toilet            | Improved            | -0.09    | 0.17  | -0.42 | 0.24  |
| Karnataka | wasted   | Location          | Urban               | 0.10     | 0.11  | -0.11 | 0.32  |
| Karnataka | wasted   | Cookign fuel      | Solid               | 0.19     | 0.10  | -0.01 | 0.40  |
| Karnataka | wasted   | Household size    | 05-Oct              | 0.08     | 0.08  | -0.08 | 0.23  |
| Karnataka | wasted   | Household size    | 10+                 | -0.17    | 0.12  | -0.40 | 0.06  |
| Karnataka | wasted   | LLIN              | Yes                 | 0.03     | 0.18  | -0.31 | 0.39  |
| Karnataka | wasted   | Access            | Significant problem | 0.10     | 0.08  | -0.05 | 0.26  |
| Karnataka | wasted   | Vaccination       | -                   | 0.06     | 4.93  | -9.45 | 9.57  |

| Name  | Response | Group             | Level      | Estimate | Error | lci   | uci   |
|-------|----------|-------------------|------------|----------|-------|-------|-------|
| Kenya | ari      | Intercept         | -          | -2.05    | 0.33  | -2.71 | -1.39 |
| Kenya | ari      | Age               | 1-2        | -0.11    | 0.10  | -0.30 | 0.08  |
| Kenya | ari      | Age               | 2-3        | -0.25    | 0.10  | -0.45 | -0.06 |
| Kenya | ari      | Age               | 3-4        | -0.37    | 0.10  | -0.58 | -0.17 |
| Kenya | ari      | Age               | 4-5        | -0.39    | 0.11  | -0.59 | -0.18 |
| Kenya | ari      | Month             | June       | -0.07    | 0.13  | -0.33 | 0.19  |
| Kenya | ari      | Month             | July       | 0.09     | 0.13  | -0.16 | 0.34  |
| Kenya | ari      | Month             | August     | 0.11     | 0.13  | -0.14 | 0.36  |
| Kenya | ari      | Month             | September  | -0.36    | 0.14  | -0.62 | -0.09 |
| Kenya | ari      | Month             | October    | -1.13    | 0.26  | -1.65 | -0.64 |
| Kenya | ari      | Wealth            | Poorer     | -0.09    | 0.10  | -0.28 | 0.10  |
| Kenya | ari      | Wealth            | Middle     | 0.06     | 0.10  | -0.15 | 0.26  |
| Kenya | ari      | Wealth            | Richer     | -0.12    | 0.12  | -0.35 | 0.12  |
| Kenya | ari      | Wealth            | Richest    | -0.38    | 0.15  | -0.68 | -0.07 |
| Kenya | ari      | Mothers education | Primary    | 0.36     | 0.13  | 0.12  | 0.61  |
| Kenya | ari      | Mothers education | Secondary  | 0.24     | 0.14  | -0.04 | 0.52  |
| Kenya | ari      | Mothers education | Higher     | 0.20     | 0.18  | -0.15 | 0.57  |
| Kenya | ari      | Mothers age       | 20-30      | -0.05    | 0.09  | -0.24 | 0.13  |
| Kenya | ari      | Mothers age       | 30-40      | -0.14    | 0.11  | -0.35 | 0.07  |
| Kenya | ari      | Mothers age       | 40+        | -0.08    | 0.19  | -0.45 | 0.29  |
| Kenya | ari      | Sex               | Female     | -0.05    | 0.06  | -0.16 | 0.07  |
| Kenya | ari      | Breastfed         | No         | -0.11    | 0.06  | -0.24 | 0.02  |
| Kenya | ari      | Toilet            | Unimproved | 0.01     | 0.07  | -0.14 | 0.15  |
| Kenya | ari      | Toilet            | Improved   | -0.09    | 0.08  | -0.24 | 0.06  |
| Kenya | ari      | Location          | Urban      | -0.04    | 0.10  | -0.24 | 0.15  |
| Kenya | ari      | Cookign fuel      | Solid      | -0.24    | 0.16  | -0.55 | 0.07  |
| Kenya | ari      | Household size    | 05-Oct     | 0.01     | 0.07  | -0.12 | 0.15  |
| Kenya | ari      | Household size    | 10+        | -0.12    | 0.13  | -0.38 | 0.14  |
| Kenya | ari      | LLIN              | Yes        | -0.06    | 0.06  | -0.19 | 0.06  |
| Kenya | ari      | Vaccination       | -          | 0.13     | 0.35  | -0.52 | 0.85  |



| Name  | Response | Group             | Level      | Estimate | Error | lci   | uci   |
|-------|----------|-------------------|------------|----------|-------|-------|-------|
| Kenya | dia      | Intercept         | -          | -0.21    | 0.28  | -0.77 | 0.32  |
| Kenya | dia      | Age               | 1-2        | -0.14    | 0.07  | -0.28 | 0.01  |
| Kenya | dia      | Age               | 2-3        | -0.67    | 0.08  | -0.82 | -0.51 |
| Kenya | dia      | Age               | 3-4        | -1.34    | 0.09  | -1.51 | -1.18 |
| Kenya | dia      | Age               | 4-5        | -1.70    | 0.09  | -1.89 | -1.51 |
| Kenya | dia      | Month             | June       | -0.15    | 0.11  | -0.36 | 0.07  |
| Kenya | dia      | Month             | July       | -0.24    | 0.11  | -0.46 | -0.01 |
| Kenya | dia      | Month             | August     | -0.20    | 0.11  | -0.42 | 0.02  |
| Kenya | dia      | Month             | September  | -0.49    | 0.11  | -0.71 | -0.26 |
| Kenya | dia      | Month             | October    | -0.62    | 0.18  | -0.97 | -0.26 |
| Kenya | dia      | Wealth            | Poorer     | 0.02     | 0.08  | -0.14 | 0.17  |
| Kenya | dia      | Wealth            | Middle     | -0.18    | 0.09  | -0.35 | 0.00  |
| Kenya | dia      | Wealth            | Richer     | -0.16    | 0.10  | -0.36 | 0.04  |
| Kenya | dia      | Wealth            | Richest    | -0.67    | 0.13  | -0.93 | -0.41 |
| Kenya | dia      | Mothers education | Primary    | 0.04     | 0.09  | -0.15 | 0.22  |
| Kenya | dia      | Mothers education | Secondary  | 0.03     | 0.11  | -0.19 | 0.24  |
| Kenya | dia      | Mothers education | Higher     | -0.45    | 0.15  | -0.75 | -0.16 |
| Kenya | dia      | Mothers age       | 20-30      | -0.24    | 0.08  | -0.38 | -0.09 |
| Kenya | dia      | Mothers age       | 30-40      | -0.32    | 0.09  | -0.48 | -0.14 |
| Kenya | dia      | Mothers age       | 40+        | -0.30    | 0.15  | -0.60 | 0.01  |
| Kenya | dia      | Sex               | Female     | -0.15    | 0.05  | -0.24 | -0.06 |
| Kenya | dia      | Breastfed         | No         | -0.01    | 0.05  | -0.11 | 0.09  |
| Kenya | dia      | Toilet            | Unimproved | 0.03     | 0.06  | -0.09 | 0.15  |
| Kenya | dia      | Toilet            | Improved   | 0.05     | 0.06  | -0.08 | 0.17  |
| Kenya | dia      | Location          | Urban      | 0.21     | 0.08  | 0.04  | 0.37  |
| Kenya | dia      | Cookign fuel      | Solid      | -0.10    | 0.14  | -0.38 | 0.17  |
| Kenya | dia      | Household size    | 05-Oct     | -0.20    | 0.06  | -0.31 | -0.08 |
| Kenya | dia      | Household size    | 10+        | -0.30    | 0.11  | -0.53 | -0.08 |
| Kenya | dia      | LLIN              | Yes        | -0.03    | 0.05  | -0.14 | 0.07  |
| Kenya | dia      | Vaccination       | -          | -0.17    | 0.30  | -0.74 | 0.43  |

| Name  | Response | Group             | Level      | Estimate | Error | lci   | uci   |
|-------|----------|-------------------|------------|----------|-------|-------|-------|
| Kenya | fever    | Intercept         | -          | -0.79    | 0.25  | -1.27 | -0.32 |
| Kenya | fever    | Age               | 1-2        | -0.04    | 0.07  | -0.17 | 0.10  |
| Kenya | fever    | Age               | 2-3        | -0.32    | 0.07  | -0.46 | -0.18 |
| Kenya | fever    | Age               | 3-4        | -0.49    | 0.07  | -0.63 | -0.35 |
| Kenya | fever    | Age               | 4-5        | -0.55    | 0.07  | -0.69 | -0.40 |
| Kenya | fever    | Month             | June       | -0.02    | 0.10  | -0.21 | 0.19  |
| Kenya | fever    | Month             | July       | -0.08    | 0.10  | -0.28 | 0.12  |
| Kenya | fever    | Month             | August     | -0.20    | 0.10  | -0.39 | 0.01  |
| Kenya | fever    | Month             | September  | -0.69    | 0.10  | -0.89 | -0.48 |
| Kenya | fever    | Month             | October    | -0.73    | 0.17  | -1.05 | -0.41 |
| Kenya | fever    | Wealth            | Poorer     | 0.03     | 0.07  | -0.11 | 0.16  |
| Kenya | fever    | Wealth            | Middle     | -0.03    | 0.08  | -0.18 | 0.11  |
| Kenya | fever    | Wealth            | Richer     | -0.06    | 0.09  | -0.22 | 0.11  |
| Kenya | fever    | Wealth            | Richest    | -0.27    | 0.11  | -0.48 | -0.06 |
| Kenya | fever    | Mothers education | Primary    | 0.47     | 0.09  | 0.30  | 0.65  |
| Kenya | fever    | Mothers education | Secondary  | 0.40     | 0.10  | 0.20  | 0.59  |
| Kenya | fever    | Mothers education | Higher     | 0.41     | 0.13  | 0.17  | 0.66  |
| Kenya | fever    | Mothers age       | 20-30      | 0.01     | 0.07  | -0.12 | 0.13  |
| Kenya | fever    | Mothers age       | 30-40      | 0.07     | 0.08  | -0.08 | 0.21  |
| Kenya | fever    | Mothers age       | 40+        | 0.13     | 0.13  | -0.12 | 0.38  |
| Kenya | fever    | Sex               | Female     | -0.03    | 0.04  | -0.11 | 0.05  |
| Kenya | fever    | Breastfed         | No         | -0.03    | 0.04  | -0.12 | 0.06  |
| Kenya | fever    | Toilet            | Unimproved | 0.00     | 0.05  | -0.10 | 0.10  |
| Kenya | fever    | Toilet            | Improved   | 0.01     | 0.06  | -0.09 | 0.12  |
| Kenya | fever    | Location          | Urban      | -0.06    | 0.08  | -0.20 | 0.09  |
| Kenya | fever    | Cookign fuel      | Solid      | 0.29     | 0.11  | 0.06  | 0.51  |
| Kenya | fever    | Household size    | 05-Oct     | -0.07    | 0.05  | -0.17 | 0.02  |
| Kenya | fever    | Household size    | 10+        | -0.09    | 0.09  | -0.27 | 0.09  |
| Kenya | fever    | LLIN              | Yes        | -0.00    | 0.05  | -0.09 | 0.09  |
| Kenya | fever    | Vaccination       | -          | -0.66    | 0.27  | -1.19 | -0.13 |

| Name  | Response | Group             | Level      | Estimate | Error | lci   | uci   |
|-------|----------|-------------------|------------|----------|-------|-------|-------|
| Kenya | wasted   | Intercept         | -          | -0.73    | 0.47  | -1.63 | 0.20  |
| Kenya | wasted   | Age               | 1-2        | -0.34    | 0.13  | -0.59 | -0.07 |
| Kenya | wasted   | Age               | 2-3        | -0.92    | 0.14  | -1.21 | -0.64 |
| Kenya | wasted   | Age               | 3-4        | -0.92    | 0.15  | -1.20 | -0.63 |
| Kenya | wasted   | Age               | 4-5        | -0.77    | 0.14  | -1.05 | -0.49 |
| Kenya | wasted   | Month             | June       | -0.27    | 0.20  | -0.66 | 0.12  |
| Kenya | wasted   | Month             | July       | -0.10    | 0.19  | -0.46 | 0.27  |
| Kenya | wasted   | Month             | August     | -0.12    | 0.19  | -0.48 | 0.24  |
| Kenya | wasted   | Month             | September  | -0.09    | 0.18  | -0.45 | 0.28  |
| Kenya | wasted   | Month             | October    | 0.23     | 0.26  | -0.30 | 0.73  |
| Kenya | wasted   | Wealth            | Poorer     | -0.43    | 0.15  | -0.72 | -0.15 |
| Kenya | wasted   | Wealth            | Middle     | -0.28    | 0.16  | -0.59 | 0.02  |
| Kenya | wasted   | Wealth            | Richer     | -0.80    | 0.19  | -1.19 | -0.43 |
| Kenya | wasted   | Wealth            | Richest    | -0.91    | 0.23  | -1.37 | -0.46 |
| Kenya | wasted   | Mothers education | Primary    | -0.60    | 0.14  | -0.87 | -0.33 |
| Kenya | wasted   | Mothers education | Secondary  | -0.56    | 0.17  | -0.90 | -0.22 |
| Kenya | wasted   | Mothers education | Higher     | -1.19    | 0.29  | -1.77 | -0.63 |
| Kenya | wasted   | Mothers age       | 20-30      | 0.17     | 0.15  | -0.12 | 0.47  |
| Kenya | wasted   | Mothers age       | 30-40      | 0.16     | 0.17  | -0.17 | 0.48  |
| Kenya | wasted   | Mothers age       | 40+        | 0.14     | 0.28  | -0.41 | 0.68  |
| Kenya | wasted   | Sex               | Female     | -0.16    | 0.09  | -0.33 | 0.01  |
| Kenya | wasted   | Breastfed         | No         | 0.19     | 0.10  | -0.00 | 0.38  |
| Kenya | wasted   | Toilet            | Unimproved | -0.13    | 0.11  | -0.36 | 0.08  |
| Kenya | wasted   | Toilet            | Improved   | 0.03     | 0.11  | -0.19 | 0.25  |
| Kenya | wasted   | Location          | Urban      | 0.16     | 0.14  | -0.12 | 0.44  |
| Kenya | wasted   | Cookign fuel      | Solid      | -0.18    | 0.27  | -0.70 | 0.35  |
| Kenya | wasted   | Household size    | 05-Oct     | 0.05     | 0.11  | -0.15 | 0.26  |
| Kenya | wasted   | Household size    | 10+        | -0.09    | 0.20  | -0.47 | 0.30  |
| Kenya | wasted   | LLIN              | Yes        | -0.21    | 0.10  | -0.40 | -0.02 |
| Kenya | wasted   | Vaccination       | -          | -1.76    | 0.44  | -2.63 | -0.92 |

| Name   | Response | Group             | Level               | Estimate | Error | lci    | uci    |
|--------|----------|-------------------|---------------------|----------|-------|--------|--------|
| Kerala | ari      | Intercept         | -                   | -23.85   | 7.28  | -38.42 | -10.16 |
| Kerala | ari      | Age               | 1-2                 | -4.22    | 1.76  | -7.73  | -0.86  |
| Kerala | ari      | Age               | 2-3                 | 0.67     | 1.45  | -2.04  | 3.60   |
| Kerala | ari      | Age               | 3-4                 | 2.82     | 1.55  | -0.07  | 6.03   |
| Kerala | ari      | Age               | 4-5                 | 0.54     | 1.61  | -2.56  | 3.77   |
| Kerala | ari      | Month             | April               | 0.66     | 2.21  | -3.69  | 4.92   |
| Kerala | ari      | Month             | May                 | -0.68    | 2.41  | -5.46  | 4.07   |
| Kerala | ari      | Month             | June                | -1.22    | 2.54  | -6.33  | 3.65   |
| Kerala | ari      | Month             | July                | 1.93     | 2.65  | -3.34  | 7.26   |
| Kerala | ari      | Wealth            | Middle              | 5.24     | 2.45  | 0.54   | 10.12  |
| Kerala | ari      | Wealth            | Richer              | 2.12     | 2.46  | -2.63  | 6.95   |
| Kerala | ari      | Wealth            | Richest             | 2.90     | 2.59  | -2.10  | 7.97   |
| Kerala | ari      | Mothers education | Secondary           | 0.76     | 3.22  | -5.29  | 7.21   |
| Kerala | ari      | Mothers education | Higher              | 0.87     | 3.25  | -5.39  | 7.28   |
| Kerala | ari      | Mothers age       | 20-30               | -0.16    | 1.33  | -2.75  | 2.49   |
| Kerala | ari      | Mothers age       | 30-40               | 2.28     | 1.45  | -0.40  | 5.33   |
| Kerala | ari      | Sex               | Female              | -0.85    | 0.81  | -2.43  | 0.75   |
| Kerala | ari      | Birth weight      | Average             | -0.65    | 0.95  | -2.55  | 1.21   |
| Kerala | ari      | Birth weight      | Below Average       | 0.74     | 1.40  | -2.04  | 3.43   |
| Kerala | ari      | Breastfed         | No                  | -1.15    | 0.84  | -2.86  | 0.47   |
| Kerala | ari      | Toilet            | Unimproved          | -2.44    | 2.96  | -8.30  | 3.36   |
| Kerala | ari      | Toilet            | Improved            | 3.78     | 1.58  | 0.74   | 6.94   |
| Kerala | ari      | Location          | Urban               | -1.03    | 1.97  | -5.04  | 2.82   |
| Kerala | ari      | Cookign fuel      | Solid               | 0.92     | 1.01  | -1.03  | 2.94   |
| Kerala | ari      | Household size    | 05-Oct              | -1.52    | 0.90  | -3.33  | 0.23   |
| Kerala | ari      | Household size    | 10+                 | 1.80     | 1.98  | -2.17  | 5.59   |
| Kerala | ari      | LLIN              | Yes                 | -2.36    | 3.89  | -10.60 | 4.49   |
| Kerala | ari      | Access            | Significant problem | 3.67     | 1.71  | 0.48   | 7.25   |
| Kerala | ari      | Vaccination       | -                   | -0.01    | 4.94  | -9.81  | 9.79   |

| Name   | Response | Group             | Level               | Estimate | Error | Ici    | uci   |
|--------|----------|-------------------|---------------------|----------|-------|--------|-------|
| Kerala | dia      | Intercept         | -                   | -3.80    | 4.57  | -12.90 | 5.04  |
| Kerala | dia      | Age               | 1-2                 | -0.37    | 0.43  | -1.22  | 0.48  |
| Kerala | dia      | Age               | 2-3                 | -1.92    | 0.45  | -2.81  | -1.05 |
| Kerala | dia      | Age               | 3-4                 | -3.02    | 0.59  | -4.22  | -1.89 |
| Kerala | dia      | Age               | 4-5                 | -2.66    | 0.54  | -3.74  | -1.62 |
| Kerala | dia      | Month             | April               | 0.32     | 0.84  | -1.30  | 1.99  |
| Kerala | dia      | Month             | May                 | -0.41    | 0.89  | -2.17  | 1.32  |
| Kerala | dia      | Month             | June                | 0.71     | 0.82  | -0.87  | 2.39  |
| Kerala | dia      | Month             | July                | 1.55     | 0.94  | -0.28  | 3.45  |
| Kerala | dia      | Wealth            | Middle              | 0.65     | 1.12  | -1.48  | 2.91  |
| Kerala | dia      | Wealth            | Richer              | 0.40     | 1.11  | -1.68  | 2.65  |
| Kerala | dia      | Wealth            | Richest             | -1.06    | 1.17  | -3.30  | 1.27  |
| Kerala | dia      | Mothers education | Secondary           | 0.31     | 1.40  | -2.19  | 3.25  |
| Kerala | dia      | Mothers education | Higher              | 1.07     | 1.43  | -1.45  | 4.07  |
| Kerala | dia      | Mothers age       | 20-30               | -2.20    | 0.57  | -3.33  | -1.13 |
| Kerala | dia      | Mothers age       | 30-40               | -2.52    | 0.65  | -3.84  | -1.29 |
| Kerala | dia      | Sex               | Female              | -0.30    | 0.29  | -0.87  | 0.25  |
| Kerala | dia      | Birth weight      | Average             | 0.15     | 0.38  | -0.57  | 0.93  |
| Kerala | dia      | Birth weight      | Below Average       | 0.63     | 0.59  | -0.53  | 1.79  |
| Kerala | dia      | Breastfed         | No                  | 0.27     | 0.39  | -0.50  | 1.03  |
| Kerala | dia      | Toilet            | Unimproved          | 3.07     | 1.39  | 0.27   | 5.78  |
| Kerala | dia      | Toilet            | Improved            | 1.31     | 0.59  | 0.14   | 2.45  |
| Kerala | dia      | Location          | Urban               | -1.04    | 0.62  | -2.34  | 0.13  |
| Kerala | dia      | Cookign fuel      | Solid               | -0.25    | 0.36  | -0.96  | 0.49  |
| Kerala | dia      | Household size    | 05-Oct              | 0.00     | 0.35  | -0.66  | 0.68  |
| Kerala | dia      | Household size    | 10+                 | 0.44     | 0.62  | -0.80  | 1.65  |
| Kerala | dia      | LLIN              | Yes                 | -0.05    | 0.63  | -1.30  | 1.14  |
| Kerala | dia      | Access            | Significant problem | -0.19    | 0.63  | -1.46  | 1.01  |
| Kerala | dia      | Vaccination       | -                   | -0.05    | 5.04  | -9.86  | 9.93  |

| Name   | Response | Group             | Level               | Estimate | Error | Ici   | uci   |
|--------|----------|-------------------|---------------------|----------|-------|-------|-------|
| Kerala | fever    | Intercept         | -                   | -0.65    | 4.24  | -8.97 | 7.71  |
| Kerala | fever    | Age               | 1-2                 | 0.90     | 0.29  | 0.34  | 1.48  |
| Kerala | fever    | Age               | 2-3                 | 0.14     | 0.29  | -0.43 | 0.70  |
| Kerala | fever    | Age               | 3-4                 | 0.11     | 0.30  | -0.48 | 0.70  |
| Kerala | fever    | Age               | 4-5                 | 0.13     | 0.31  | -0.46 | 0.73  |
| Kerala | fever    | Month             | April               | -0.70    | 0.36  | -1.41 | 0.00  |
| Kerala | fever    | Month             | May                 | -1.17    | 0.37  | -1.91 | -0.46 |
| Kerala | fever    | Month             | June                | -1.52    | 0.39  | -2.29 | -0.79 |
| Kerala | fever    | Month             | July                | -1.05    | 0.47  | -1.98 | -0.15 |
| Kerala | fever    | Wealth            | Middle              | 0.25     | 0.64  | -0.97 | 1.52  |
| Kerala | fever    | Wealth            | Richer              | -0.49    | 0.63  | -1.74 | 0.75  |
| Kerala | fever    | Wealth            | Richest             | -0.95    | 0.66  | -2.24 | 0.36  |
| Kerala | fever    | Mothers education | Secondary           | -1.77    | 0.65  | -3.02 | -0.47 |
| Kerala | fever    | Mothers education | Higher              | -2.04    | 0.67  | -3.32 | -0.73 |
| Kerala | fever    | Mothers age       | 20-30               | 0.78     | 0.43  | -0.04 | 1.65  |
| Kerala | fever    | Mothers age       | 30-40               | 0.65     | 0.46  | -0.20 | 1.55  |
| Kerala | fever    | Sex               | Female              | 0.09     | 0.15  | -0.19 | 0.37  |
| Kerala | fever    | Birth weight      | Average             | -0.32    | 0.19  | -0.68 | 0.05  |
| Kerala | fever    | Birth weight      | Below Average       | 0.33     | 0.29  | -0.24 | 0.88  |
| Kerala | fever    | Breastfed         | No                  | -0.39    | 0.19  | -0.77 | -0.01 |
| Kerala | fever    | Toilet            | Unimproved          | -2.86    | 1.51  | -6.24 | -0.30 |
| Kerala | fever    | Toilet            | Improved            | 0.54     | 0.30  | -0.07 | 1.13  |
| Kerala | fever    | Location          | Urban               | -0.11    | 0.27  | -0.63 | 0.42  |
| Kerala | fever    | Cookign fuel      | Solid               | -0.24    | 0.20  | -0.63 | 0.13  |
| Kerala | fever    | Household size    | 05-Oct              | -0.03    | 0.17  | -0.34 | 0.30  |
| Kerala | fever    | Household size    | 10+                 | 0.11     | 0.34  | -0.56 | 0.76  |
| Kerala | fever    | LLIN              | Yes                 | 0.56     | 0.41  | -0.27 | 1.36  |
| Kerala | fever    | Access            | Significant problem | 0.22     | 0.35  | -0.47 | 0.88  |
| Kerala | fever    | Vaccination       | -                   | 0.03     | 5.04  | -9.96 | 9.95  |

| Name              | Response | Group             | Level               | Estimate | Error | lci    | uci  |
|-------------------|----------|-------------------|---------------------|----------|-------|--------|------|
| Arunachal Pradesh | dia      | Intercept         | -                   | -4.00    | 3.25  | -10.54 | 2.14 |
| Arunachal Pradesh | dia      | Age               | 1-2                 | -0.04    | 1.46  | -2.92  | 2.90 |
| Arunachal Pradesh | dia      | Age               | 2-3                 | -0.47    | 1.48  | -3.34  | 2.49 |
| Arunachal Pradesh | dia      | Age               | 3-4                 | -0.76    | 1.53  | -3.76  | 2.32 |
| Arunachal Pradesh | dia      | Age               | 4-5                 | -0.98    | 1.54  | -3.97  | 2.14 |
| Arunachal Pradesh | dia      | Month             | May                 | 0.14     | 1.33  | -2.42  | 2.79 |
| Arunachal Pradesh | dia      | Month             | June                | -0.52    | 3.64  | -8.28  | 5.94 |
| Arunachal Pradesh | dia      | Month             | August              | -0.52    | 1.54  | -3.69  | 2.42 |
| Arunachal Pradesh | dia      | Month             | September           | -0.41    | 1.62  | -3.72  | 2.69 |
| Arunachal Pradesh | dia      | Month             | October             | -0.80    | 1.50  | -3.77  | 2.18 |
| Arunachal Pradesh | dia      | Month             | November            | -0.65    | 1.62  | -3.96  | 2.51 |
| Arunachal Pradesh | dia      | Wealth            | Poorer              | 0.33     | 1.28  | -2.22  | 2.90 |
| Arunachal Pradesh | dia      | Wealth            | Middle              | -0.49    | 1.51  | -3.51  | 2.42 |
| Arunachal Pradesh | dia      | Wealth            | Richer              | -0.11    | 1.78  | -3.64  | 3.38 |
| Arunachal Pradesh | dia      | Wealth            | Richest             | -1.84    | 2.43  | -6.92  | 2.68 |
| Arunachal Pradesh | dia      | Mothers education | Primary             | 0.44     | 1.40  | -2.42  | 3.12 |
| Arunachal Pradesh | dia      | Mothers education | Secondary           | 0.54     | 1.13  | -1.58  | 2.85 |
| Arunachal Pradesh | dia      | Mothers education | Higher              | 0.53     | 1.95  | -3.67  | 4.06 |
| Arunachal Pradesh | dia      | Mothers age       | 20-30               | 0.54     | 1.32  | -1.85  | 3.43 |
| Arunachal Pradesh | dia      | Mothers age       | 30-40               | 0.04     | 1.58  | -3.03  | 3.27 |
| Arunachal Pradesh | dia      | Mothers age       | 40+                 | 0.29     | 2.89  | -5.97  | 5.31 |
| Arunachal Pradesh | dia      | Sex               | Female              | 0.05     | 0.83  | -1.63  | 1.67 |
| Arunachal Pradesh | dia      | Birth weight      | Average             | 0.15     | 1.10  | -1.89  | 2.48 |
| Arunachal Pradesh | dia      | Birth weight      | Below Average       | 0.22     | 1.45  | -2.65  | 3.07 |
| Arunachal Pradesh | dia      | Breastfed         | No                  | 0.68     | 0.93  | -1.14  | 2.51 |
| Arunachal Pradesh | dia      | Toilet            | Unimproved          | 0.46     | 1.06  | -1.69  | 2.54 |
| Arunachal Pradesh | dia      | Toilet            | Improved            | -0.41    | 1.31  | -3.29  | 1.92 |
| Arunachal Pradesh | dia      | Location          | Urban               | -0.17    | 1.13  | -2.47  | 1.96 |
| Arunachal Pradesh | dia      | Cookign fuel      | Solid               | -0.77    | 1.33  | -3.43  | 1.85 |
| Arunachal Pradesh | dia      | Household size    | 05-Oct              | -0.14    | 0.92  | -1.90  | 1.70 |
| Arunachal Pradesh | dia      | Household size    | 10+                 | 1.12     | 1.73  | -2.50  | 4.31 |
| Arunachal Pradesh | dia      | LLIN              | Yes                 | 0.04     | 0.98  | -1.96  | 1.91 |
| Arunachal Pradesh | dia      | Access            | Significant problem | -0.01    | 0.91  | -1.75  | 1.80 |
| Arunachal Pradesh | dia      | Vaccination       | -                   | -0.03    | 4.99  | -9.71  | 9.68 |

| Name   | Response | Group             | Level               | Estimate | Error | lci    | uci   |
|--------|----------|-------------------|---------------------|----------|-------|--------|-------|
| Kerala | wasted   | Intercept         | -                   | -3.21    | 4.18  | -11.41 | 5.02  |
| Kerala | wasted   | Age               | 1-2                 | -0.96    | 0.23  | -1.41  | -0.52 |
| Kerala | wasted   | Age               | 2-3                 | -0.60    | 0.22  | -1.03  | -0.18 |
| Kerala | wasted   | Age               | 3-4                 | -1.26    | 0.24  | -1.72  | -0.80 |
| Kerala | wasted   | Age               | 4-5                 | -1.12    | 0.24  | -1.58  | -0.65 |
| Kerala | wasted   | Month             | April               | 0.08     | 0.32  | -0.54  | 0.72  |
| Kerala | wasted   | Month             | May                 | 0.42     | 0.32  | -0.23  | 1.05  |
| Kerala | wasted   | Month             | June                | -0.19    | 0.34  | -0.85  | 0.48  |
| Kerala | wasted   | Month             | July                | -0.82    | 0.45  | -1.70  | 0.03  |
| Kerala | wasted   | Wealth            | Middle              | 0.23     | 0.53  | -0.78  | 1.32  |
| Kerala | wasted   | Wealth            | Richer              | -0.48    | 0.52  | -1.47  | 0.58  |
| Kerala | wasted   | Wealth            | Richest             | -0.50    | 0.54  | -1.54  | 0.60  |
| Kerala | wasted   | Mothers education | Secondary           | 1.33     | 1.07  | -0.56  | 3.61  |
| Kerala | wasted   | Mothers education | Higher              | 0.91     | 1.08  | -1.02  | 3.20  |
| Kerala | wasted   | Mothers age       | 20-30               | 0.36     | 0.32  | -0.25  | 0.99  |
| Kerala | wasted   | Mothers age       | 30-40               | 1.21     | 0.34  | 0.56   | 1.90  |
| Kerala | wasted   | Sex               | Female              | 0.06     | 0.13  | -0.18  | 0.32  |
| Kerala | wasted   | Birth weight      | Average             | 0.06     | 0.19  | -0.31  | 0.43  |
| Kerala | wasted   | Birth weight      | Below Average       | 1.23     | 0.27  | 0.73   | 1.75  |
| Kerala | wasted   | Breastfed         | No                  | 0.08     | 0.17  | -0.25  | 0.41  |
| Kerala | wasted   | Toilet            | Unimproved          | 0.03     | 0.82  | -1.65  | 1.55  |
| Kerala | wasted   | Toilet            | Improved            | 0.58     | 0.26  | 0.06   | 1.08  |
| Kerala | wasted   | Location          | Urban               | -0.12    | 0.23  | -0.58  | 0.34  |
| Kerala | wasted   | Cookign fuel      | Solid               | -0.49    | 0.16  | -0.82  | -0.18 |
| Kerala | wasted   | Household size    | 05-Oct              | 0.41     | 0.16  | 0.11   | 0.73  |
| Kerala | wasted   | Household size    | 10+                 | 0.38     | 0.32  | -0.27  | 1.00  |
| Kerala | wasted   | LLIN              | Yes                 | 0.28     | 0.42  | -0.58  | 1.10  |
| Kerala | wasted   | Access            | Significant problem | -0.18    | 0.32  | -0.80  | 0.45  |
| Kerala | wasted   | Vaccination       | -                   | -0.04    | 4.94  | -9.74  | 9.76  |



| <b>Name</b> | <b>Response</b> | <b>Group</b>      | <b>Level</b>        | <b>Estimate</b> | <b>Error</b> | <b>lci</b> | <b>uci</b> |
|-------------|-----------------|-------------------|---------------------|-----------------|--------------|------------|------------|
| Lakshadweep | ari             | Intercept         | -                   | -16.43          | 11.55        | -39.25     | 5.56       |
| Lakshadweep | ari             | Age               | 1-2                 | 0.30            | 4.57         | -8.81      | 9.16       |
| Lakshadweep | ari             | Age               | 2-3                 | 0.73            | 4.57         | -8.29      | 9.50       |
| Lakshadweep | ari             | Age               | 3-4                 | -0.50           | 4.55         | -9.66      | 8.22       |
| Lakshadweep | ari             | Age               | 4-5                 | -0.35           | 4.68         | -9.52      | 8.61       |
| Lakshadweep | ari             | Month             | August              | -0.90           | 4.55         | -9.75      | 7.94       |
| Lakshadweep | ari             | Month             | September           | -0.39           | 4.76         | -9.73      | 8.99       |
| Lakshadweep | ari             | Wealth            | Richer              | 0.01            | 4.33         | -8.45      | 8.58       |
| Lakshadweep | ari             | Wealth            | Richest             | 0.36            | 4.45         | -8.32      | 9.03       |
| Lakshadweep | ari             | Mothers education | Secondary           | -0.46           | 4.38         | -8.97      | 8.31       |
| Lakshadweep | ari             | Mothers education | Higher              | 0.03            | 4.53         | -8.89      | 8.74       |
| Lakshadweep | ari             | Mothers age       | 30-40               | -0.27           | 4.28         | -8.48      | 7.76       |
| Lakshadweep | ari             | Mothers age       | 40+                 | -0.06           | 5.01         | -9.63      | 9.53       |
| Lakshadweep | ari             | Sex               | Female              | -0.32           | 4.32         | -8.71      | 8.30       |
| Lakshadweep | ari             | Birth weight      | Average             | -0.25           | 4.25         | -8.55      | 7.97       |
| Lakshadweep | ari             | Birth weight      | Below Average       | 0.84            | 4.44         | -8.11      | 9.48       |
| Lakshadweep | ari             | Breastfed         | No                  | 0.11            | 4.37         | -8.53      | 8.38       |
| Lakshadweep | ari             | Toilet            | Improved            | 0.37            | 4.63         | -8.85      | 9.38       |
| Lakshadweep | ari             | Location          | Urban               | 0.52            | 4.76         | -8.65      | 10.20      |
| Lakshadweep | ari             | Cookign fuel      | Solid               | 0.25            | 4.42         | -8.27      | 8.89       |
| Lakshadweep | ari             | Household size    | 05-Oct              | -1.02           | 4.37         | -9.46      | 7.66       |
| Lakshadweep | ari             | Household size    | 10+                 | -0.04           | 4.52         | -9.11      | 8.70       |
| Lakshadweep | ari             | LLIN              | Yes                 | 0.00            | 4.97         | -9.55      | 9.73       |
| Lakshadweep | ari             | Access            | Significant problem | -0.68           | 4.36         | -9.48      | 7.89       |
| Lakshadweep | ari             | Vaccination       | -                   | 0.03            | 4.99         | -9.62      | 9.73       |

| <b>Name</b> | <b>Response</b> | <b>Group</b>      | <b>Level</b>        | <b>Estimate</b> | <b>Error</b> | <b>lci</b> | <b>uci</b> |
|-------------|-----------------|-------------------|---------------------|-----------------|--------------|------------|------------|
| Lakshadweep | dia             | Intercept         | -                   | -9.38           | 10.55        | -30.58     | 10.43      |
| Lakshadweep | dia             | Age               | 1-2                 | 0.06            | 3.88         | -7.65      | 7.60       |
| Lakshadweep | dia             | Age               | 2-3                 | -2.06           | 4.13         | -10.44     | 5.82       |
| Lakshadweep | dia             | Age               | 3-4                 | -1.79           | 4.04         | -9.98      | 5.80       |
| Lakshadweep | dia             | Age               | 4-5                 | 0.05            | 3.93         | -7.80      | 7.52       |
| Lakshadweep | dia             | Month             | August              | 1.73            | 4.30         | -6.67      | 10.25      |
| Lakshadweep | dia             | Month             | September           | -0.63           | 4.69         | -9.99      | 8.22       |
| Lakshadweep | dia             | Wealth            | Richer              | 0.21            | 3.93         | -7.52      | 7.98       |
| Lakshadweep | dia             | Wealth            | Richest             | -0.98           | 4.10         | -9.03      | 7.06       |
| Lakshadweep | dia             | Mothers education | Secondary           | -0.02           | 3.99         | -7.72      | 8.03       |
| Lakshadweep | dia             | Mothers education | Higher              | -0.15           | 4.33         | -8.65      | 8.24       |
| Lakshadweep | dia             | Mothers age       | 30-40               | 1.60            | 3.57         | -5.27      | 8.66       |
| Lakshadweep | dia             | Mothers age       | 40+                 | 0.61            | 4.85         | -8.91      | 9.89       |
| Lakshadweep | dia             | Sex               | Female              | 0.27            | 3.64         | -7.02      | 7.41       |
| Lakshadweep | dia             | Birth weight      | Average             | -2.27           | 3.67         | -9.57      | 4.87       |
| Lakshadweep | dia             | Birth weight      | Below Average       | -0.04           | 3.99         | -8.07      | 7.70       |
| Lakshadweep | dia             | Breastfed         | No                  | -1.06           | 3.97         | -9.05      | 6.38       |
| Lakshadweep | dia             | Toilet            | Improved            | -1.11           | 4.19         | -9.68      | 6.78       |
| Lakshadweep | dia             | Location          | Urban               | -2.19           | 4.21         | -10.38     | 6.19       |
| Lakshadweep | dia             | Cookign fuel      | Solid               | 0.44            | 4.00         | -7.26      | 8.52       |
| Lakshadweep | dia             | Household size    | 05-Oct              | 1.24            | 3.96         | -6.38      | 9.18       |
| Lakshadweep | dia             | Household size    | 10+                 | -0.01           | 4.12         | -8.35      | 8.03       |
| Lakshadweep | dia             | LLIN              | Yes                 | -0.12           | 4.91         | -9.76      | 9.48       |
| Lakshadweep | dia             | Access            | Significant problem | -0.59           | 3.73         | -8.14      | 6.66       |
| Lakshadweep | dia             | Vaccination       | -                   | -0.02           | 5.06         | -9.99      | 9.92       |

| Name        | Response | Group             | Level               | Estimate | Error | lci    | uci   |
|-------------|----------|-------------------|---------------------|----------|-------|--------|-------|
| Lakshadweep | fever    | Intercept         | -                   | -2.32    | 9.41  | -21.08 | 15.69 |
| Lakshadweep | fever    | Age               | 1-2                 | -0.23    | 3.55  | -7.29  | 6.61  |
| Lakshadweep | fever    | Age               | 2-3                 | 1.94     | 3.42  | -4.82  | 8.65  |
| Lakshadweep | fever    | Age               | 3-4                 | -1.48    | 3.61  | -8.82  | 5.53  |
| Lakshadweep | fever    | Age               | 4-5                 | -0.89    | 3.74  | -8.35  | 6.10  |
| Lakshadweep | fever    | Month             | August              | -0.10    | 3.89  | -7.54  | 7.55  |
| Lakshadweep | fever    | Month             | September           | -0.42    | 4.46  | -9.35  | 8.16  |
| Lakshadweep | fever    | Wealth            | Richer              | 1.34     | 3.77  | -5.89  | 8.73  |
| Lakshadweep | fever    | Wealth            | Richest             | 0.79     | 3.75  | -6.34  | 8.15  |
| Lakshadweep | fever    | Mothers education | Secondary           | -0.86    | 3.59  | -7.90  | 6.30  |
| Lakshadweep | fever    | Mothers education | Higher              | -1.03    | 3.89  | -8.70  | 6.58  |
| Lakshadweep | fever    | Mothers age       | 30-40               | -2.22    | 3.23  | -8.75  | 3.96  |
| Lakshadweep | fever    | Mothers age       | 40+                 | 0.13     | 4.75  | -9.50  | 9.28  |
| Lakshadweep | fever    | Sex               | Female              | -1.02    | 3.11  | -7.26  | 4.92  |
| Lakshadweep | fever    | Birth weight      | Average             | -1.37    | 3.24  | -7.58  | 5.12  |
| Lakshadweep | fever    | Birth weight      | Below Average       | 1.34     | 3.67  | -5.93  | 8.45  |
| Lakshadweep | fever    | Breastfed         | No                  | -2.24    | 3.58  | -9.52  | 4.38  |
| Lakshadweep | fever    | Toilet            | Improved            | -0.45    | 3.85  | -8.25  | 6.69  |
| Lakshadweep | fever    | Location          | Urban               | -0.39    | 3.90  | -7.82  | 7.39  |
| Lakshadweep | fever    | Cookign fuel      | Solid               | -0.56    | 3.47  | -7.38  | 6.41  |
| Lakshadweep | fever    | Household size    | 05-Oct              | -1.17    | 3.41  | -7.76  | 5.44  |
| Lakshadweep | fever    | Household size    | 10+                 | -1.69    | 3.81  | -9.34  | 5.68  |
| Lakshadweep | fever    | LLIN              | Yes                 | -0.15    | 5.06  | -10.03 | 9.69  |
| Lakshadweep | fever    | Access            | Significant problem | -1.08    | 3.19  | -7.58  | 5.13  |
| Lakshadweep | fever    | Vaccination       | -                   | 0.07     | 4.93  | -9.79  | 9.90  |

| Name        | Response | Group             | Level               | Estimate | Error | lci    | uci  |
|-------------|----------|-------------------|---------------------|----------|-------|--------|------|
| Lakshadweep | wasted   | Intercept         | -                   | -9.28    | 9.69  | -28.37 | 9.21 |
| Lakshadweep | wasted   | Age               | 1-2                 | 0.42     | 3.68  | -6.81  | 7.54 |
| Lakshadweep | wasted   | Age               | 2-3                 | 0.48     | 3.71  | -6.96  | 7.49 |
| Lakshadweep | wasted   | Age               | 3-4                 | 0.67     | 3.56  | -6.38  | 7.52 |
| Lakshadweep | wasted   | Age               | 4-5                 | 0.14     | 3.74  | -7.39  | 7.30 |
| Lakshadweep | wasted   | Month             | August              | 0.51     | 3.91  | -6.99  | 8.27 |
| Lakshadweep | wasted   | Month             | September           | 0.78     | 4.41  | -7.90  | 9.43 |
| Lakshadweep | wasted   | Wealth            | Richer              | 1.10     | 3.75  | -6.22  | 8.53 |
| Lakshadweep | wasted   | Wealth            | Richest             | -0.20    | 3.85  | -7.97  | 7.21 |
| Lakshadweep | wasted   | Mothers education | Secondary           | 1.07     | 3.89  | -6.38  | 8.79 |
| Lakshadweep | wasted   | Mothers education | Higher              | -2.55    | 4.19  | -10.93 | 5.52 |
| Lakshadweep | wasted   | Mothers age       | 30-40               | 0.98     | 3.15  | -5.25  | 7.17 |
| Lakshadweep | wasted   | Mothers age       | 40+                 | -0.55    | 4.74  | -9.93  | 8.55 |
| Lakshadweep | wasted   | Sex               | Female              | -2.14    | 3.13  | -8.39  | 3.95 |
| Lakshadweep | wasted   | Birth weight      | Average             | 0.87     | 3.39  | -5.48  | 7.71 |
| Lakshadweep | wasted   | Birth weight      | Below Average       | 1.43     | 3.70  | -5.95  | 8.70 |
| Lakshadweep | wasted   | Breastfed         | No                  | -0.34    | 3.47  | -7.40  | 6.19 |
| Lakshadweep | wasted   | Toilet            | Improved            | -0.79    | 3.87  | -8.53  | 6.49 |
| Lakshadweep | wasted   | Location          | Urban               | -1.25    | 3.95  | -8.65  | 6.80 |
| Lakshadweep | wasted   | Cookign fuel      | Solid               | 0.14     | 3.67  | -6.76  | 7.59 |
| Lakshadweep | wasted   | Household size    | 05-Oct              | 1.29     | 3.53  | -5.47  | 8.47 |
| Lakshadweep | wasted   | Household size    | 10+                 | -1.04    | 3.91  | -8.81  | 6.54 |
| Lakshadweep | wasted   | LLIN              | Yes                 | -0.21    | 4.94  | -9.88  | 9.47 |
| Lakshadweep | wasted   | Access            | Significant problem | 0.55     | 3.15  | -5.64  | 6.70 |
| Lakshadweep | wasted   | Vaccination       | -                   | 0.02     | 4.96  | -9.86  | 9.89 |

| Name    | Response | Group             | Level               | Estimate | Error | Ici    | uci   |
|---------|----------|-------------------|---------------------|----------|-------|--------|-------|
| Lesotho | ari      | Intercept         | -                   | -8.43    | 2.63  | -13.86 | -3.56 |
| Lesotho | ari      | Age               | 1-2                 | 0.73     | 0.63  | -0.50  | 2.04  |
| Lesotho | ari      | Age               | 2-3                 | -0.02    | 0.71  | -1.42  | 1.39  |
| Lesotho | ari      | Age               | 3-4                 | 0.82     | 0.68  | -0.50  | 2.17  |
| Lesotho | ari      | Age               | 4-5                 | 0.34     | 0.71  | -1.06  | 1.73  |
| Lesotho | ari      | Month             | October             | 0.34     | 0.79  | -1.14  | 1.94  |
| Lesotho | ari      | Month             | November            | 0.15     | 0.78  | -1.33  | 1.74  |
| Lesotho | ari      | Month             | December            | 0.27     | 1.19  | -2.16  | 2.55  |
| Lesotho | ari      | Wealth            | Poorer              | 0.26     | 0.58  | -0.86  | 1.40  |
| Lesotho | ari      | Wealth            | Middle              | 0.45     | 0.70  | -0.92  | 1.82  |
| Lesotho | ari      | Wealth            | Richer              | 1.56     | 0.75  | 0.08   | 3.05  |
| Lesotho | ari      | Wealth            | Richest             | 1.56     | 0.98  | -0.34  | 3.48  |
| Lesotho | ari      | Mothers education | Primary             | 0.75     | 1.52  | -1.89  | 4.17  |
| Lesotho | ari      | Mothers education | Secondary           | -0.03    | 1.54  | -2.73  | 3.37  |
| Lesotho | ari      | Mothers education | Higher              | -0.87    | 1.79  | -4.26  | 2.83  |
| Lesotho | ari      | Mothers age       | 20-30               | 0.62     | 0.60  | -0.50  | 1.87  |
| Lesotho | ari      | Mothers age       | 30-40               | 1.08     | 0.64  | -0.11  | 2.39  |
| Lesotho | ari      | Mothers age       | 40+                 | 0.41     | 0.95  | -1.48  | 2.22  |
| Lesotho | ari      | Sex               | Female              | -0.23    | 0.36  | -0.94  | 0.47  |
| Lesotho | ari      | Birth weight      | Average             | -0.85    | 0.44  | -1.73  | 0.04  |
| Lesotho | ari      | Birth weight      | Below Average       | 0.08     | 0.58  | -1.08  | 1.22  |
| Lesotho | ari      | Breastfed         | No                  | -0.72    | 0.47  | -1.64  | 0.16  |
| Lesotho | ari      | Toilet            | Unimproved          | 0.50     | 0.51  | -0.52  | 1.51  |
| Lesotho | ari      | Toilet            | Improved            | -1.20    | 0.58  | -2.41  | -0.15 |
| Lesotho | ari      | Location          | Urban               | -0.02    | 0.66  | -1.33  | 1.28  |
| Lesotho | ari      | Cookign fuel      | Solid               | 1.23     | 0.65  | 0.01   | 2.60  |
| Lesotho | ari      | Household size    | 05-Oct              | -0.13    | 0.41  | -0.91  | 0.69  |
| Lesotho | ari      | Household size    | 10+                 | -0.51    | 0.78  | -2.15  | 0.91  |
| Lesotho | ari      | Access            | Significant problem | 0.07     | 0.39  | -0.68  | 0.83  |
| Lesotho | ari      | Vaccination       | -                   | 2.48     | 2.63  | -2.60  | 7.80  |

| Name    | Response | Group             | Level               | Estimate | Error | Ici    | uci   |
|---------|----------|-------------------|---------------------|----------|-------|--------|-------|
| Lesotho | dia      | Intercept         | -                   | -5.67    | 2.50  | -10.89 | -1.14 |
| Lesotho | dia      | Age               | 1-2                 | -0.05    | 0.32  | -0.67  | 0.56  |
| Lesotho | dia      | Age               | 2-3                 | -1.32    | 0.39  | -2.11  | -0.56 |
| Lesotho | dia      | Age               | 3-4                 | -2.18    | 0.49  | -3.20  | -1.26 |
| Lesotho | dia      | Age               | 4-5                 | -2.26    | 0.50  | -3.26  | -1.30 |
| Lesotho | dia      | Month             | October             | 0.07     | 0.49  | -0.86  | 1.05  |
| Lesotho | dia      | Month             | November            | -0.49    | 0.50  | -1.46  | 0.50  |
| Lesotho | dia      | Month             | December            | -0.23    | 0.82  | -1.86  | 1.32  |
| Lesotho | dia      | Wealth            | Poorer              | -0.06    | 0.37  | -0.81  | 0.67  |
| Lesotho | dia      | Wealth            | Middle              | -0.49    | 0.46  | -1.40  | 0.39  |
| Lesotho | dia      | Wealth            | Richer              | -1.20    | 0.58  | -2.39  | -0.08 |
| Lesotho | dia      | Wealth            | Richest             | -0.78    | 0.67  | -2.12  | 0.51  |
| Lesotho | dia      | Mothers education | Primary             | 2.51     | 2.03  | -0.88  | 6.94  |
| Lesotho | dia      | Mothers education | Secondary           | 2.46     | 2.03  | -0.96  | 6.87  |
| Lesotho | dia      | Mothers education | Higher              | 0.46     | 2.17  | -3.38  | 5.03  |
| Lesotho | dia      | Mothers age       | 20-30               | -0.49    | 0.30  | -1.09  | 0.11  |
| Lesotho | dia      | Mothers age       | 30-40               | -0.84    | 0.39  | -1.62  | -0.10 |
| Lesotho | dia      | Mothers age       | 40+                 | -0.67    | 0.67  | -2.03  | 0.56  |
| Lesotho | dia      | Sex               | Female              | -0.01    | 0.24  | -0.48  | 0.46  |
| Lesotho | dia      | Birth weight      | Average             | -0.24    | 0.33  | -0.88  | 0.42  |
| Lesotho | dia      | Birth weight      | Below Average       | 0.30     | 0.42  | -0.53  | 1.13  |
| Lesotho | dia      | Breastfed         | No                  | -0.23    | 0.32  | -0.87  | 0.39  |
| Lesotho | dia      | Toilet            | Unimproved          | 0.19     | 0.36  | -0.51  | 0.90  |
| Lesotho | dia      | Toilet            | Improved            | 0.28     | 0.33  | -0.37  | 0.93  |
| Lesotho | dia      | Location          | Urban               | 0.47     | 0.45  | -0.41  | 1.35  |
| Lesotho | dia      | Cookign fuel      | Solid               | -0.51    | 0.46  | -1.42  | 0.40  |
| Lesotho | dia      | Household size    | 05-Oct              | -0.05    | 0.28  | -0.59  | 0.50  |
| Lesotho | dia      | Household size    | 10+                 | -0.56    | 0.52  | -1.60  | 0.43  |
| Lesotho | dia      | Access            | Significant problem | -0.01    | 0.26  | -0.54  | 0.50  |
| Lesotho | dia      | Vaccination       | -                   | 4.54     | 1.93  | 0.82   | 8.38  |

| Name    | Response | Group             | Level               | Estimate | Error | lci   | uci   |
|---------|----------|-------------------|---------------------|----------|-------|-------|-------|
| Lesotho | fever    | Intercept         | -                   | -3.32    | 1.62  | -6.61 | -0.31 |
| Lesotho | fever    | Age               | 1-2                 | 0.07     | 0.34  | -0.58 | 0.75  |
| Lesotho | fever    | Age               | 2-3                 | 0.16     | 0.36  | -0.53 | 0.87  |
| Lesotho | fever    | Age               | 3-4                 | 0.07     | 0.39  | -0.70 | 0.86  |
| Lesotho | fever    | Age               | 4-5                 | -0.22    | 0.39  | -0.98 | 0.54  |
| Lesotho | fever    | Month             | October             | -0.11    | 0.44  | -0.96 | 0.77  |
| Lesotho | fever    | Month             | November            | -0.37    | 0.45  | -1.27 | 0.51  |
| Lesotho | fever    | Month             | December            | -0.86    | 0.75  | -2.35 | 0.55  |
| Lesotho | fever    | Wealth            | Poorer              | 0.20     | 0.35  | -0.48 | 0.89  |
| Lesotho | fever    | Wealth            | Middle              | 0.67     | 0.41  | -0.12 | 1.49  |
| Lesotho | fever    | Wealth            | Richer              | 1.17     | 0.47  | 0.24  | 2.11  |
| Lesotho | fever    | Wealth            | Richest             | 1.43     | 0.57  | 0.34  | 2.58  |
| Lesotho | fever    | Mothers education | Primary             | -0.19    | 0.91  | -1.88 | 1.68  |
| Lesotho | fever    | Mothers education | Secondary           | -0.12    | 0.92  | -1.84 | 1.79  |
| Lesotho | fever    | Mothers education | Higher              | -1.85    | 1.09  | -3.93 | 0.35  |
| Lesotho | fever    | Mothers age       | 20-30               | 0.47     | 0.32  | -0.14 | 1.11  |
| Lesotho | fever    | Mothers age       | 30-40               | 0.53     | 0.35  | -0.15 | 1.23  |
| Lesotho | fever    | Mothers age       | 40+                 | 0.61     | 0.52  | -0.42 | 1.65  |
| Lesotho | fever    | Sex               | Female              | -0.18    | 0.21  | -0.59 | 0.22  |
| Lesotho | fever    | Birth weight      | Average             | -0.13    | 0.28  | -0.69 | 0.44  |
| Lesotho | fever    | Birth weight      | Below Average       | 0.50     | 0.36  | -0.20 | 1.22  |
| Lesotho | fever    | Breastfed         | No                  | -0.56    | 0.26  | -1.08 | -0.05 |
| Lesotho | fever    | Toilet            | Unimproved          | 0.20     | 0.31  | -0.41 | 0.80  |
| Lesotho | fever    | Toilet            | Improved            | -0.48    | 0.32  | -1.13 | 0.13  |
| Lesotho | fever    | Location          | Urban               | 0.41     | 0.40  | -0.37 | 1.20  |
| Lesotho | fever    | Cookign fuel      | Solid               | 0.73     | 0.36  | 0.03  | 1.44  |
| Lesotho | fever    | Household size    | 05-Oct              | 0.50     | 0.26  | -0.00 | 1.02  |
| Lesotho | fever    | Household size    | 10+                 | 0.04     | 0.46  | -0.86 | 0.92  |
| Lesotho | fever    | Access            | Significant problem | 0.78     | 0.24  | 0.33  | 1.26  |
| Lesotho | fever    | Vaccination       | -                   | -0.79    | 1.72  | -4.09 | 2.60  |

| Name    | Response | Group             | Level               | Estimate | Error | Ici    | uci   |
|---------|----------|-------------------|---------------------|----------|-------|--------|-------|
| Lesotho | wasted   | Intercept         | -                   | -18.10   | 5.20  | -28.88 | -8.64 |
| Lesotho | wasted   | Age               | 1-2                 | 0.17     | 0.93  | -1.56  | 2.11  |
| Lesotho | wasted   | Age               | 2-3                 | -1.65    | 1.04  | -3.80  | 0.33  |
| Lesotho | wasted   | Age               | 3-4                 | -5.61    | 1.84  | -9.71  | -2.39 |
| Lesotho | wasted   | Age               | 4-5                 | -3.17    | 1.25  | -5.80  | -0.90 |
| Lesotho | wasted   | Month             | October             | -0.95    | 1.51  | -3.87  | 2.18  |
| Lesotho | wasted   | Month             | November            | 0.17     | 1.48  | -2.61  | 3.23  |
| Lesotho | wasted   | Month             | December            | -2.31    | 2.76  | -8.09  | 2.83  |
| Lesotho | wasted   | Wealth            | Poorer              | 1.06     | 0.91  | -0.63  | 2.94  |
| Lesotho | wasted   | Wealth            | Middle              | -1.08    | 1.44  | -4.15  | 1.51  |
| Lesotho | wasted   | Wealth            | Richer              | 1.32     | 1.57  | -1.75  | 4.45  |
| Lesotho | wasted   | Wealth            | Richest             | -2.97    | 2.74  | -8.77  | 1.95  |
| Lesotho | wasted   | Mothers education | Primary             | 2.47     | 2.62  | -2.25  | 7.93  |
| Lesotho | wasted   | Mothers education | Secondary           | 0.32     | 2.64  | -4.45  | 5.78  |
| Lesotho | wasted   | Mothers education | Higher              | -0.59    | 3.33  | -7.34  | 5.86  |
| Lesotho | wasted   | Mothers age       | 20-30               | 0.69     | 0.98  | -1.14  | 2.70  |
| Lesotho | wasted   | Mothers age       | 30-40               | -0.42    | 1.19  | -2.85  | 1.84  |
| Lesotho | wasted   | Mothers age       | 40+                 | 1.25     | 1.58  | -1.75  | 4.42  |
| Lesotho | wasted   | Sex               | Female              | 0.70     | 0.68  | -0.60  | 2.08  |
| Lesotho | wasted   | Birth weight      | Average             | 1.76     | 1.18  | -0.31  | 4.34  |
| Lesotho | wasted   | Birth weight      | Below Average       | 3.29     | 1.38  | 0.90   | 6.34  |
| Lesotho | wasted   | Breastfed         | No                  | 0.96     | 0.82  | -0.67  | 2.57  |
| Lesotho | wasted   | Toilet            | Unimproved          | 2.11     | 1.05  | 0.21   | 4.43  |
| Lesotho | wasted   | Toilet            | Improved            | 0.79     | 0.99  | -1.01  | 2.93  |
| Lesotho | wasted   | Location          | Urban               | 2.06     | 1.47  | -0.68  | 5.33  |
| Lesotho | wasted   | Cookign fuel      | Solid               | 2.33     | 1.72  | -0.76  | 6.03  |
| Lesotho | wasted   | Household size    | 05-Oct              | 0.44     | 0.82  | -1.15  | 2.08  |
| Lesotho | wasted   | Household size    | 10+                 | -1.03    | 1.67  | -4.52  | 2.04  |
| Lesotho | wasted   | Access            | Significant problem | 0.75     | 0.84  | -0.77  | 2.60  |
| Lesotho | wasted   | Vaccination       | -                   | 4.37     | 3.90  | -3.55  | 11.71 |



| Name    | Response | Group             | Level               | Estimate | Error | lci   | uci   |
|---------|----------|-------------------|---------------------|----------|-------|-------|-------|
| Liberia | ari      | Intercept         | -                   | -1.47    | 0.67  | -2.79 | -0.15 |
| Liberia | ari      | Age               | 1-2                 | -0.32    | 0.26  | -0.82 | 0.18  |
| Liberia | ari      | Age               | 2-3                 | -0.84    | 0.29  | -1.41 | -0.27 |
| Liberia | ari      | Age               | 3-4                 | -0.79    | 0.30  | -1.37 | -0.21 |
| Liberia | ari      | Age               | 4-5                 | -1.41    | 0.33  | -2.08 | -0.77 |
| Liberia | ari      | Month             | April               | -0.77    | 0.46  | -1.67 | 0.12  |
| Liberia | ari      | Month             | May                 | -0.08    | 0.53  | -1.12 | 0.96  |
| Liberia | ari      | Month             | June                | 0.36     | 0.56  | -0.73 | 1.46  |
| Liberia | ari      | Month             | July                | 0.22     | 0.71  | -1.19 | 1.61  |
| Liberia | ari      | Wealth            | Poorer              | -0.06    | 0.27  | -0.59 | 0.46  |
| Liberia | ari      | Wealth            | Middle              | -0.56    | 0.36  | -1.29 | 0.14  |
| Liberia | ari      | Wealth            | Richer              | -0.29    | 0.43  | -1.14 | 0.54  |
| Liberia | ari      | Wealth            | Richest             | -0.10    | 0.48  | -1.05 | 0.83  |
| Liberia | ari      | Mothers education | Primary             | -0.43    | 0.24  | -0.90 | 0.03  |
| Liberia | ari      | Mothers education | Secondary           | 0.12     | 0.27  | -0.41 | 0.63  |
| Liberia | ari      | Mothers age       | 20-30               | -0.19    | 0.27  | -0.70 | 0.34  |
| Liberia | ari      | Mothers age       | 30-40               | -0.09    | 0.30  | -0.67 | 0.50  |
| Liberia | ari      | Mothers age       | 40+                 | 0.29     | 0.43  | -0.56 | 1.13  |
| Liberia | ari      | Sex               | Female              | -0.26    | 0.19  | -0.63 | 0.10  |
| Liberia | ari      | Birth weight      | Average             | -0.15    | 0.21  | -0.57 | 0.27  |
| Liberia | ari      | Birth weight      | Below Average       | 0.17     | 0.24  | -0.30 | 0.65  |
| Liberia | ari      | Breastfed         | No                  | 0.07     | 0.21  | -0.35 | 0.48  |
| Liberia | ari      | Toilet            | Unimproved          | 0.08     | 0.23  | -0.38 | 0.55  |
| Liberia | ari      | Toilet            | Improved            | 0.23     | 0.24  | -0.24 | 0.72  |
| Liberia | ari      | Location          | Urban               | -0.30    | 0.32  | -0.93 | 0.34  |
| Liberia | ari      | Household size    | 05-Oct              | 0.14     | 0.23  | -0.30 | 0.58  |
| Liberia | ari      | Household size    | 10+                 | 0.17     | 0.31  | -0.45 | 0.77  |
| Liberia | ari      | LLIN              | Yes                 | 0.16     | 0.20  | -0.22 | 0.55  |
| Liberia | ari      | Access            | Significant problem | 0.22     | 0.22  | -0.21 | 0.65  |
| Liberia | ari      | Vaccination       | -                   | -1.81    | 1.52  | -4.76 | 1.17  |

| Name              | Response | Group             | Level               | Estimate | Error | lci   | uci  |
|-------------------|----------|-------------------|---------------------|----------|-------|-------|------|
| Arunachal Pradesh | fever    | Intercept         | -                   | -2.99    | 2.71  | -8.35 | 2.24 |
| Arunachal Pradesh | fever    | Age               | 1-2                 | -0.10    | 1.16  | -2.36 | 2.22 |
| Arunachal Pradesh | fever    | Age               | 2-3                 | 0.07     | 1.13  | -2.07 | 2.39 |
| Arunachal Pradesh | fever    | Age               | 3-4                 | -0.50    | 1.19  | -2.83 | 1.88 |
| Arunachal Pradesh | fever    | Age               | 4-5                 | -1.01    | 1.25  | -3.48 | 1.47 |
| Arunachal Pradesh | fever    | Month             | May                 | -0.56    | 1.15  | -2.84 | 1.76 |
| Arunachal Pradesh | fever    | Month             | June                | -1.80    | 3.69  | -9.83 | 4.49 |
| Arunachal Pradesh | fever    | Month             | August              | -0.29    | 1.19  | -2.70 | 2.02 |
| Arunachal Pradesh | fever    | Month             | September           | -0.16    | 1.23  | -2.65 | 2.17 |
| Arunachal Pradesh | fever    | Month             | October             | 0.06     | 1.08  | -2.06 | 2.19 |
| Arunachal Pradesh | fever    | Month             | November            | -0.73    | 1.29  | -3.33 | 1.71 |
| Arunachal Pradesh | fever    | Wealth            | Poorer              | 0.26     | 0.97  | -1.64 | 2.18 |
| Arunachal Pradesh | fever    | Wealth            | Middle              | -0.04    | 1.16  | -2.35 | 2.25 |
| Arunachal Pradesh | fever    | Wealth            | Richer              | 0.22     | 1.48  | -2.66 | 3.16 |
| Arunachal Pradesh | fever    | Wealth            | Richest             | 0.04     | 1.83  | -3.67 | 3.50 |
| Arunachal Pradesh | fever    | Mothers education | Primary             | -0.12    | 1.03  | -2.23 | 1.84 |
| Arunachal Pradesh | fever    | Mothers education | Secondary           | -0.20    | 0.83  | -1.80 | 1.45 |
| Arunachal Pradesh | fever    | Mothers education | Higher              | -0.74    | 1.71  | -4.35 | 2.33 |
| Arunachal Pradesh | fever    | Mothers age       | 20-30               | 0.56     | 1.09  | -1.39 | 2.97 |
| Arunachal Pradesh | fever    | Mothers age       | 30-40               | 0.27     | 1.26  | -2.12 | 2.92 |
| Arunachal Pradesh | fever    | Mothers age       | 40+                 | -0.27    | 2.62  | -6.14 | 4.28 |
| Arunachal Pradesh | fever    | Sex               | Female              | 0.03     | 0.64  | -1.25 | 1.30 |
| Arunachal Pradesh | fever    | Birth weight      | Average             | 0.10     | 0.87  | -1.52 | 1.93 |
| Arunachal Pradesh | fever    | Birth weight      | Below Average       | 0.31     | 1.16  | -2.03 | 2.59 |
| Arunachal Pradesh | fever    | Breastfed         | No                  | 0.05     | 0.72  | -1.40 | 1.44 |
| Arunachal Pradesh | fever    | Toilet            | Unimproved          | 0.32     | 0.81  | -1.28 | 1.91 |
| Arunachal Pradesh | fever    | Toilet            | Improved            | 0.21     | 0.90  | -1.65 | 1.89 |
| Arunachal Pradesh | fever    | Location          | Urban               | 0.00     | 0.92  | -1.80 | 1.75 |
| Arunachal Pradesh | fever    | Cookign fuel      | Solid               | -0.27    | 1.06  | -2.29 | 1.87 |
| Arunachal Pradesh | fever    | Household size    | 05-Oct              | 0.36     | 0.74  | -1.03 | 1.83 |
| Arunachal Pradesh | fever    | Household size    | 10+                 | 0.44     | 1.54  | -2.79 | 3.22 |
| Arunachal Pradesh | fever    | LLIN              | Yes                 | -0.12    | 0.73  | -1.61 | 1.29 |
| Arunachal Pradesh | fever    | Access            | Significant problem | -0.20    | 0.71  | -1.58 | 1.21 |
| Arunachal Pradesh | fever    | Vaccination       | -                   | 0.08     | 4.91  | -9.56 | 9.70 |

| Name    | Response | Group             | Level               | Estimate | Error | lci   | uci   |
|---------|----------|-------------------|---------------------|----------|-------|-------|-------|
| Liberia | dia      | Intercept         | -                   | 0.34     | 0.41  | -0.47 | 1.15  |
| Liberia | dia      | Age               | 1-2                 | 0.10     | 0.17  | -0.23 | 0.42  |
| Liberia | dia      | Age               | 2-3                 | -0.25    | 0.18  | -0.60 | 0.09  |
| Liberia | dia      | Age               | 3-4                 | -0.58    | 0.19  | -0.95 | -0.21 |
| Liberia | dia      | Age               | 4-5                 | -0.94    | 0.20  | -1.33 | -0.55 |
| Liberia | dia      | Month             | April               | 0.62     | 0.28  | 0.07  | 1.17  |
| Liberia | dia      | Month             | May                 | 0.37     | 0.33  | -0.27 | 0.99  |
| Liberia | dia      | Month             | June                | 0.32     | 0.34  | -0.34 | 1.00  |
| Liberia | dia      | Month             | July                | -0.47    | 0.46  | -1.38 | 0.43  |
| Liberia | dia      | Wealth            | Poorer              | 0.29     | 0.17  | -0.04 | 0.62  |
| Liberia | dia      | Wealth            | Middle              | 0.41     | 0.21  | 0.00  | 0.81  |
| Liberia | dia      | Wealth            | Richer              | 0.46     | 0.26  | -0.04 | 0.96  |
| Liberia | dia      | Wealth            | Richest             | 0.61     | 0.30  | 0.00  | 1.20  |
| Liberia | dia      | Mothers education | Primary             | -0.03    | 0.14  | -0.30 | 0.24  |
| Liberia | dia      | Mothers education | Secondary           | -0.10    | 0.16  | -0.41 | 0.22  |
| Liberia | dia      | Mothers age       | 20-30               | -0.03    | 0.15  | -0.32 | 0.28  |
| Liberia | dia      | Mothers age       | 30-40               | -0.26    | 0.17  | -0.59 | 0.09  |
| Liberia | dia      | Mothers age       | 40+                 | -0.95    | 0.32  | -1.58 | -0.34 |
| Liberia | dia      | Sex               | Female              | 0.01     | 0.11  | -0.20 | 0.23  |
| Liberia | dia      | Birth weight      | Average             | 0.05     | 0.13  | -0.19 | 0.30  |
| Liberia | dia      | Birth weight      | Below Average       | 0.08     | 0.15  | -0.21 | 0.36  |
| Liberia | dia      | Breastfed         | No                  | -0.26    | 0.13  | -0.52 | -0.01 |
| Liberia | dia      | Toilet            | Unimproved          | -0.05    | 0.14  | -0.32 | 0.23  |
| Liberia | dia      | Toilet            | Improved            | 0.53     | 0.15  | 0.24  | 0.84  |
| Liberia | dia      | Location          | Urban               | -0.11    | 0.19  | -0.47 | 0.26  |
| Liberia | dia      | Household size    | 05-Oct              | -0.10    | 0.13  | -0.36 | 0.16  |
| Liberia | dia      | Household size    | 10+                 | -0.06    | 0.18  | -0.43 | 0.30  |
| Liberia | dia      | LLIN              | Yes                 | -0.10    | 0.12  | -0.33 | 0.14  |
| Liberia | dia      | Access            | Significant problem | -0.24    | 0.13  | -0.49 | 0.01  |
| Liberia | dia      | Vaccination       | -                   | -3.34    | 0.92  | -5.11 | -1.55 |

| Name    | Response | Group             | Level               | Estimate | Error | lci   | uci   |
|---------|----------|-------------------|---------------------|----------|-------|-------|-------|
| Liberia | fever    | Intercept         | -                   | 0.43     | 0.40  | -0.34 | 1.21  |
| Liberia | fever    | Age               | 1-2                 | -0.18    | 0.16  | -0.50 | 0.14  |
| Liberia | fever    | Age               | 2-3                 | -0.44    | 0.17  | -0.76 | -0.12 |
| Liberia | fever    | Age               | 3-4                 | -0.66    | 0.17  | -1.01 | -0.32 |
| Liberia | fever    | Age               | 4-5                 | -0.67    | 0.18  | -1.02 | -0.31 |
| Liberia | fever    | Month             | April               | -0.39    | 0.27  | -0.93 | 0.14  |
| Liberia | fever    | Month             | May                 | -0.13    | 0.31  | -0.74 | 0.48  |
| Liberia | fever    | Month             | June                | 0.22     | 0.33  | -0.43 | 0.86  |
| Liberia | fever    | Month             | July                | -0.30    | 0.42  | -1.14 | 0.53  |
| Liberia | fever    | Wealth            | Poorer              | -0.14    | 0.16  | -0.44 | 0.17  |
| Liberia | fever    | Wealth            | Middle              | -0.02    | 0.19  | -0.39 | 0.36  |
| Liberia | fever    | Wealth            | Richer              | -0.38    | 0.24  | -0.86 | 0.09  |
| Liberia | fever    | Wealth            | Richest             | -0.51    | 0.28  | -1.07 | 0.04  |
| Liberia | fever    | Mothers education | Primary             | 0.26     | 0.13  | 0.01  | 0.51  |
| Liberia | fever    | Mothers education | Secondary           | 0.63     | 0.15  | 0.35  | 0.92  |
| Liberia | fever    | Mothers age       | 20-30               | 0.10     | 0.14  | -0.18 | 0.38  |
| Liberia | fever    | Mothers age       | 30-40               | 0.23     | 0.16  | -0.09 | 0.57  |
| Liberia | fever    | Mothers age       | 40+                 | 0.45     | 0.26  | -0.05 | 0.96  |
| Liberia | fever    | Sex               | Female              | -0.12    | 0.10  | -0.33 | 0.08  |
| Liberia | fever    | Birth weight      | Average             | -0.24    | 0.12  | -0.46 | -0.01 |
| Liberia | fever    | Birth weight      | Below Average       | -0.03    | 0.14  | -0.30 | 0.23  |
| Liberia | fever    | Breastfed         | No                  | -0.21    | 0.12  | -0.44 | 0.02  |
| Liberia | fever    | Toilet            | Unimproved          | -0.15    | 0.13  | -0.41 | 0.11  |
| Liberia | fever    | Toilet            | Improved            | 0.37     | 0.14  | 0.09  | 0.64  |
| Liberia | fever    | Location          | Urban               | -0.38    | 0.18  | -0.74 | -0.03 |
| Liberia | fever    | Household size    | 05-Oct              | -0.11    | 0.12  | -0.35 | 0.13  |
| Liberia | fever    | Household size    | 10+                 | 0.12     | 0.17  | -0.21 | 0.45  |
| Liberia | fever    | LLIN              | Yes                 | 0.22     | 0.11  | 0.01  | 0.44  |
| Liberia | fever    | Access            | Significant problem | -0.14    | 0.12  | -0.38 | 0.09  |
| Liberia | fever    | Vaccination       | -                   | -1.30    | 0.88  | -2.99 | 0.45  |

| Name    | Response | Group             | Level               | Estimate | Error | lci   | uci   |
|---------|----------|-------------------|---------------------|----------|-------|-------|-------|
| Liberia | wasted   | Intercept         | -                   | -3.07    | 0.75  | -4.55 | -1.64 |
| Liberia | wasted   | Age               | 1-2                 | -0.64    | 0.24  | -1.11 | -0.17 |
| Liberia | wasted   | Age               | 2-3                 | -1.41    | 0.29  | -1.99 | -0.86 |
| Liberia | wasted   | Age               | 3-4                 | -2.19    | 0.35  | -2.92 | -1.53 |
| Liberia | wasted   | Age               | 4-5                 | -2.12    | 0.37  | -2.86 | -1.40 |
| Liberia | wasted   | Month             | April               | 0.59     | 0.48  | -0.35 | 1.55  |
| Liberia | wasted   | Month             | May                 | 0.99     | 0.55  | -0.10 | 2.08  |
| Liberia | wasted   | Month             | June                | 0.93     | 0.58  | -0.25 | 2.08  |
| Liberia | wasted   | Month             | July                | 1.13     | 0.73  | -0.32 | 2.56  |
| Liberia | wasted   | Wealth            | Poorer              | 0.25     | 0.30  | -0.34 | 0.87  |
| Liberia | wasted   | Wealth            | Middle              | 0.24     | 0.36  | -0.48 | 0.94  |
| Liberia | wasted   | Wealth            | Richer              | 0.01     | 0.43  | -0.83 | 0.88  |
| Liberia | wasted   | Wealth            | Richest             | -0.10    | 0.51  | -1.13 | 0.90  |
| Liberia | wasted   | Mothers education | Primary             | -0.11    | 0.25  | -0.59 | 0.38  |
| Liberia | wasted   | Mothers education | Secondary           | 0.17     | 0.28  | -0.38 | 0.72  |
| Liberia | wasted   | Mothers age       | 20-30               | 0.23     | 0.27  | -0.29 | 0.79  |
| Liberia | wasted   | Mothers age       | 30-40               | 0.26     | 0.31  | -0.35 | 0.88  |
| Liberia | wasted   | Mothers age       | 40+                 | -0.44    | 0.64  | -1.79 | 0.74  |
| Liberia | wasted   | Sex               | Female              | -0.27    | 0.19  | -0.65 | 0.10  |
| Liberia | wasted   | Birth weight      | Average             | 0.94     | 0.24  | 0.48  | 1.41  |
| Liberia | wasted   | Birth weight      | Below Average       | 1.57     | 0.25  | 1.07  | 2.05  |
| Liberia | wasted   | Breastfed         | No                  | 0.12     | 0.23  | -0.34 | 0.58  |
| Liberia | wasted   | Toilet            | Unimproved          | 0.01     | 0.24  | -0.46 | 0.49  |
| Liberia | wasted   | Toilet            | Improved            | 0.21     | 0.27  | -0.32 | 0.72  |
| Liberia | wasted   | Location          | Urban               | 0.07     | 0.31  | -0.54 | 0.67  |
| Liberia | wasted   | Household size    | 05-Oct              | 0.40     | 0.25  | -0.07 | 0.90  |
| Liberia | wasted   | Household size    | 10+                 | 0.87     | 0.32  | 0.25  | 1.50  |
| Liberia | wasted   | LLIN              | Yes                 | 0.12     | 0.21  | -0.28 | 0.53  |
| Liberia | wasted   | Access            | Significant problem | -0.17    | 0.23  | -0.60 | 0.28  |
| Liberia | wasted   | Vaccination       | -                   | -2.37    | 1.50  | -5.35 | 0.58  |

| Name           | Response | Group             | Level               | Estimate | Error | Ici   | uci   |
|----------------|----------|-------------------|---------------------|----------|-------|-------|-------|
| Madhya Pradesh | ari      | Intercept         | -                   | -4.16    | 2.31  | -8.56 | 0.32  |
| Madhya Pradesh | ari      | Age               | 1-2                 | 0.26     | 0.22  | -0.18 | 0.70  |
| Madhya Pradesh | ari      | Age               | 2-3                 | -0.03    | 0.24  | -0.50 | 0.44  |
| Madhya Pradesh | ari      | Age               | 3-4                 | -0.23    | 0.25  | -0.71 | 0.26  |
| Madhya Pradesh | ari      | Age               | 4-5                 | -0.40    | 0.26  | -0.91 | 0.11  |
| Madhya Pradesh | ari      | Month             | March               | -0.52    | 0.20  | -0.91 | -0.11 |
| Madhya Pradesh | ari      | Month             | April               | -0.88    | 0.23  | -1.32 | -0.44 |
| Madhya Pradesh | ari      | Month             | May                 | -1.09    | 0.23  | -1.54 | -0.62 |
| Madhya Pradesh | ari      | Month             | June                | -1.70    | 0.30  | -2.30 | -1.14 |
| Madhya Pradesh | ari      | Month             | July                | -2.34    | 0.59  | -3.63 | -1.33 |
| Madhya Pradesh | ari      | Wealth            | Poorer              | 0.06     | 0.18  | -0.29 | 0.39  |
| Madhya Pradesh | ari      | Wealth            | Middle              | 0.25     | 0.23  | -0.21 | 0.70  |
| Madhya Pradesh | ari      | Wealth            | Richer              | 0.30     | 0.33  | -0.34 | 0.93  |
| Madhya Pradesh | ari      | Wealth            | Richest             | 0.70     | 0.40  | -0.10 | 1.47  |
| Madhya Pradesh | ari      | Mothers education | Primary             | 0.31     | 0.19  | -0.06 | 0.68  |
| Madhya Pradesh | ari      | Mothers education | Secondary           | 0.18     | 0.18  | -0.16 | 0.54  |
| Madhya Pradesh | ari      | Mothers education | Higher              | 0.05     | 0.37  | -0.70 | 0.77  |
| Madhya Pradesh | ari      | Mothers age       | 20-30               | -0.05    | 0.22  | -0.46 | 0.37  |
| Madhya Pradesh | ari      | Mothers age       | 30-40               | 0.23     | 0.28  | -0.33 | 0.78  |
| Madhya Pradesh | ari      | Sex               | Female              | 0.15     | 0.13  | -0.10 | 0.41  |
| Madhya Pradesh | ari      | Birth weight      | Average             | -0.10    | 0.17  | -0.44 | 0.24  |
| Madhya Pradesh | ari      | Birth weight      | Below Average       | 0.24     | 0.22  | -0.20 | 0.67  |
| Madhya Pradesh | ari      | Breastfed         | No                  | -0.17    | 0.15  | -0.46 | 0.12  |
| Madhya Pradesh | ari      | Toilet            | Unimproved          | 0.48     | 0.23  | 0.04  | 0.93  |
| Madhya Pradesh | ari      | Toilet            | Improved            | -0.36    | 0.21  | -0.78 | 0.04  |
| Madhya Pradesh | ari      | Location          | Urban               | -0.51    | 0.23  | -0.97 | -0.06 |
| Madhya Pradesh | ari      | Cookign fuel      | Solid               | 0.20     | 0.27  | -0.32 | 0.74  |
| Madhya Pradesh | ari      | Household size    | 05-Oct              | -0.08    | 0.16  | -0.39 | 0.25  |
| Madhya Pradesh | ari      | Household size    | 10+                 | -0.39    | 0.25  | -0.91 | 0.09  |
| Madhya Pradesh | ari      | LLIN              | Yes                 | -0.91    | 0.65  | -2.34 | 0.22  |
| Madhya Pradesh | ari      | Access            | Significant problem | -0.05    | 0.14  | -0.33 | 0.23  |
| Madhya Pradesh | ari      | Vaccination       | -                   | -0.05    | 4.97  | -9.75 | 9.44  |

| Name           | Response | Group             | Level               | Estimate | Error | lci   | uci   |
|----------------|----------|-------------------|---------------------|----------|-------|-------|-------|
| Madhya Pradesh | dia      | Intercept         | -                   | -1.75    | 2.30  | -6.17 | 2.80  |
| Madhya Pradesh | dia      | Age               | 1-2                 | -0.21    | 0.10  | -0.39 | -0.02 |
| Madhya Pradesh | dia      | Age               | 2-3                 | -0.84    | 0.11  | -1.05 | -0.63 |
| Madhya Pradesh | dia      | Age               | 3-4                 | -1.24    | 0.12  | -1.46 | -1.00 |
| Madhya Pradesh | dia      | Age               | 4-5                 | -1.44    | 0.13  | -1.69 | -1.20 |
| Madhya Pradesh | dia      | Month             | March               | -0.37    | 0.12  | -0.61 | -0.13 |
| Madhya Pradesh | dia      | Month             | April               | -0.18    | 0.12  | -0.42 | 0.06  |
| Madhya Pradesh | dia      | Month             | May                 | -0.09    | 0.12  | -0.33 | 0.14  |
| Madhya Pradesh | dia      | Month             | June                | -0.35    | 0.13  | -0.61 | -0.10 |
| Madhya Pradesh | dia      | Month             | July                | -0.44    | 0.19  | -0.81 | -0.07 |
| Madhya Pradesh | dia      | Wealth            | Poorer              | 0.08     | 0.09  | -0.11 | 0.26  |
| Madhya Pradesh | dia      | Wealth            | Middle              | 0.12     | 0.12  | -0.12 | 0.35  |
| Madhya Pradesh | dia      | Wealth            | Richer              | -0.06    | 0.16  | -0.38 | 0.25  |
| Madhya Pradesh | dia      | Wealth            | Richest             | -0.04    | 0.19  | -0.42 | 0.34  |
| Madhya Pradesh | dia      | Mothers education | Primary             | 0.19     | 0.10  | -0.00 | 0.38  |
| Madhya Pradesh | dia      | Mothers education | Secondary           | 0.10     | 0.09  | -0.07 | 0.28  |
| Madhya Pradesh | dia      | Mothers education | Higher              | -0.06    | 0.17  | -0.40 | 0.27  |
| Madhya Pradesh | dia      | Mothers age       | 20-30               | 0.12     | 0.12  | -0.11 | 0.36  |
| Madhya Pradesh | dia      | Mothers age       | 30-40               | 0.12     | 0.15  | -0.18 | 0.42  |
| Madhya Pradesh | dia      | Sex               | Female              | -0.07    | 0.07  | -0.19 | 0.06  |
| Madhya Pradesh | dia      | Birth weight      | Average             | -0.10    | 0.09  | -0.26 | 0.07  |
| Madhya Pradesh | dia      | Birth weight      | Below Average       | 0.25     | 0.12  | 0.02  | 0.48  |
| Madhya Pradesh | dia      | Breastfed         | No                  | -0.18    | 0.08  | -0.33 | -0.04 |
| Madhya Pradesh | dia      | Toilet            | Unimproved          | 0.03     | 0.11  | -0.19 | 0.23  |
| Madhya Pradesh | dia      | Toilet            | Improved            | -0.15    | 0.10  | -0.35 | 0.04  |
| Madhya Pradesh | dia      | Location          | Urban               | 0.11     | 0.11  | -0.10 | 0.31  |
| Madhya Pradesh | dia      | Cookign fuel      | Solid               | -0.09    | 0.13  | -0.34 | 0.15  |
| Madhya Pradesh | dia      | Household size    | 05-Oct              | 0.07     | 0.08  | -0.09 | 0.24  |
| Madhya Pradesh | dia      | Household size    | 10+                 | 0.03     | 0.12  | -0.21 | 0.26  |
| Madhya Pradesh | dia      | LLIN              | Yes                 | -0.04    | 0.22  | -0.50 | 0.39  |
| Madhya Pradesh | dia      | Access            | Significant problem | 0.10     | 0.07  | -0.04 | 0.24  |
| Madhya Pradesh | dia      | Vaccination       | -                   | 0.08     | 5.03  | -9.78 | 9.82  |

| Name           | Response | Group             | Level               | Estimate | Error | lci   | uci   |
|----------------|----------|-------------------|---------------------|----------|-------|-------|-------|
| Madhya Pradesh | fever    | Intercept         | -                   | -1.40    | 2.27  | -5.89 | 3.19  |
| Madhya Pradesh | fever    | Age               | 1-2                 | 0.05     | 0.10  | -0.15 | 0.25  |
| Madhya Pradesh | fever    | Age               | 2-3                 | -0.31    | 0.11  | -0.51 | -0.10 |
| Madhya Pradesh | fever    | Age               | 3-4                 | -0.34    | 0.11  | -0.56 | -0.13 |
| Madhya Pradesh | fever    | Age               | 4-5                 | -0.57    | 0.11  | -0.78 | -0.34 |
| Madhya Pradesh | fever    | Month             | March               | -0.31    | 0.11  | -0.51 | -0.10 |
| Madhya Pradesh | fever    | Month             | April               | -0.52    | 0.11  | -0.74 | -0.31 |
| Madhya Pradesh | fever    | Month             | May                 | -0.61    | 0.11  | -0.82 | -0.39 |
| Madhya Pradesh | fever    | Month             | June                | -1.13    | 0.13  | -1.38 | -0.89 |
| Madhya Pradesh | fever    | Month             | July                | -0.80    | 0.17  | -1.15 | -0.46 |
| Madhya Pradesh | fever    | Wealth            | Poorer              | 0.15     | 0.09  | -0.02 | 0.31  |
| Madhya Pradesh | fever    | Wealth            | Middle              | 0.19     | 0.11  | -0.03 | 0.40  |
| Madhya Pradesh | fever    | Wealth            | Richer              | 0.20     | 0.14  | -0.08 | 0.49  |
| Madhya Pradesh | fever    | Wealth            | Richest             | 0.14     | 0.18  | -0.20 | 0.49  |
| Madhya Pradesh | fever    | Mothers education | Primary             | 0.23     | 0.09  | 0.06  | 0.41  |
| Madhya Pradesh | fever    | Mothers education | Secondary           | 0.25     | 0.08  | 0.09  | 0.41  |
| Madhya Pradesh | fever    | Mothers education | Higher              | 0.22     | 0.16  | -0.09 | 0.52  |
| Madhya Pradesh | fever    | Mothers age       | 20-30               | -0.09    | 0.10  | -0.28 | 0.12  |
| Madhya Pradesh | fever    | Mothers age       | 30-40               | 0.10     | 0.13  | -0.16 | 0.35  |
| Madhya Pradesh | fever    | Sex               | Female              | 0.02     | 0.06  | -0.10 | 0.14  |
| Madhya Pradesh | fever    | Birth weight      | Average             | -0.16    | 0.08  | -0.31 | -0.00 |
| Madhya Pradesh | fever    | Birth weight      | Below Average       | 0.28     | 0.10  | 0.08  | 0.48  |
| Madhya Pradesh | fever    | Breastfed         | No                  | -0.34    | 0.07  | -0.47 | -0.20 |
| Madhya Pradesh | fever    | Toilet            | Unimproved          | 0.02     | 0.10  | -0.18 | 0.22  |
| Madhya Pradesh | fever    | Toilet            | Improved            | -0.13    | 0.09  | -0.31 | 0.04  |
| Madhya Pradesh | fever    | Location          | Urban               | -0.25    | 0.10  | -0.46 | -0.05 |
| Madhya Pradesh | fever    | Cookign fuel      | Solid               | -0.13    | 0.11  | -0.35 | 0.09  |
| Madhya Pradesh | fever    | Household size    | 05-Oct              | -0.05    | 0.07  | -0.20 | 0.10  |
| Madhya Pradesh | fever    | Household size    | 10+                 | -0.12    | 0.11  | -0.32 | 0.09  |
| Madhya Pradesh | fever    | LLIN              | Yes                 | -0.07    | 0.20  | -0.47 | 0.32  |
| Madhya Pradesh | fever    | Access            | Significant problem | 0.05     | 0.07  | -0.08 | 0.18  |
| Madhya Pradesh | fever    | Vaccination       | -                   | 0.02     | 4.97  | -9.83 | 9.92  |



| Name           | Response | Group             | Level               | Estimate | Error | lci   | uci   |
|----------------|----------|-------------------|---------------------|----------|-------|-------|-------|
| Madhya Pradesh | wasted   | Intercept         | -                   | -0.98    | 2.26  | -5.36 | 3.39  |
| Madhya Pradesh | wasted   | Age               | 1-2                 | -0.26    | 0.07  | -0.40 | -0.12 |
| Madhya Pradesh | wasted   | Age               | 2-3                 | -0.48    | 0.08  | -0.63 | -0.34 |
| Madhya Pradesh | wasted   | Age               | 3-4                 | -0.63    | 0.08  | -0.78 | -0.48 |
| Madhya Pradesh | wasted   | Age               | 4-5                 | -0.69    | 0.08  | -0.85 | -0.54 |
| Madhya Pradesh | wasted   | Month             | March               | 0.28     | 0.07  | 0.14  | 0.43  |
| Madhya Pradesh | wasted   | Month             | April               | 0.30     | 0.08  | 0.15  | 0.45  |
| Madhya Pradesh | wasted   | Month             | May                 | 0.61     | 0.07  | 0.46  | 0.76  |
| Madhya Pradesh | wasted   | Month             | June                | 0.61     | 0.08  | 0.46  | 0.77  |
| Madhya Pradesh | wasted   | Month             | July                | 0.41     | 0.11  | 0.19  | 0.62  |
| Madhya Pradesh | wasted   | Wealth            | Poorer              | -0.08    | 0.06  | -0.20 | 0.03  |
| Madhya Pradesh | wasted   | Wealth            | Middle              | -0.18    | 0.08  | -0.33 | -0.03 |
| Madhya Pradesh | wasted   | Wealth            | Richer              | -0.11    | 0.10  | -0.32 | 0.09  |
| Madhya Pradesh | wasted   | Wealth            | Richest             | -0.40    | 0.13  | -0.66 | -0.15 |
| Madhya Pradesh | wasted   | Mothers education | Primary             | -0.12    | 0.06  | -0.25 | 0.00  |
| Madhya Pradesh | wasted   | Mothers education | Secondary           | -0.05    | 0.06  | -0.16 | 0.06  |
| Madhya Pradesh | wasted   | Mothers education | Higher              | -0.12    | 0.12  | -0.35 | 0.10  |
| Madhya Pradesh | wasted   | Mothers age       | 20-30               | 0.01     | 0.07  | -0.13 | 0.16  |
| Madhya Pradesh | wasted   | Mothers age       | 30-40               | 0.08     | 0.09  | -0.10 | 0.27  |
| Madhya Pradesh | wasted   | Sex               | Female              | -0.12    | 0.04  | -0.20 | -0.04 |
| Madhya Pradesh | wasted   | Birth weight      | Average             | 0.02     | 0.06  | -0.10 | 0.13  |
| Madhya Pradesh | wasted   | Birth weight      | Below Average       | 0.44     | 0.08  | 0.29  | 0.58  |
| Madhya Pradesh | wasted   | Breastfed         | No                  | -0.11    | 0.05  | -0.20 | -0.01 |
| Madhya Pradesh | wasted   | Toilet            | Unimproved          | 0.15     | 0.07  | 0.01  | 0.29  |
| Madhya Pradesh | wasted   | Toilet            | Improved            | 0.04     | 0.06  | -0.08 | 0.15  |
| Madhya Pradesh | wasted   | Location          | Urban               | -0.08    | 0.07  | -0.22 | 0.05  |
| Madhya Pradesh | wasted   | Cookign fuel      | Solid               | 0.05     | 0.08  | -0.12 | 0.21  |
| Madhya Pradesh | wasted   | Household size    | 05-Oct              | -0.04    | 0.05  | -0.15 | 0.06  |
| Madhya Pradesh | wasted   | Household size    | 10+                 | -0.02    | 0.08  | -0.17 | 0.13  |
| Madhya Pradesh | wasted   | LLIN              | Yes                 | -0.25    | 0.15  | -0.55 | 0.04  |
| Madhya Pradesh | wasted   | Access            | Significant problem | 0.08     | 0.05  | -0.01 | 0.17  |
| Madhya Pradesh | wasted   | Vaccination       | -                   | -0.04    | 4.97  | -9.70 | 9.52  |

| Name        | Response | Group             | Level               | Estimate | Error | lci    | uci   |
|-------------|----------|-------------------|---------------------|----------|-------|--------|-------|
| Maharashtra | ari      | Intercept         | -                   | -7.31    | 2.73  | -12.71 | -2.01 |
| Maharashtra | ari      | Age               | 1-2                 | -0.16    | 0.20  | -0.56  | 0.23  |
| Maharashtra | ari      | Age               | 2-3                 | -0.55    | 0.20  | -0.95  | -0.14 |
| Maharashtra | ari      | Age               | 3-4                 | -0.67    | 0.22  | -1.12  | -0.24 |
| Maharashtra | ari      | Age               | 4-5                 | -0.36    | 0.21  | -0.77  | 0.05  |
| Maharashtra | ari      | Month             | May                 | -1.23    | 0.53  | -2.29  | -0.21 |
| Maharashtra | ari      | Month             | June                | -1.34    | 0.51  | -2.36  | -0.32 |
| Maharashtra | ari      | Month             | July                | -1.39    | 0.53  | -2.41  | -0.34 |
| Maharashtra | ari      | Month             | August              | -2.16    | 0.63  | -3.43  | -0.95 |
| Maharashtra | ari      | Month             | September           | -2.41    | 0.77  | -4.00  | -0.92 |
| Maharashtra | ari      | Wealth            | Poorer              | -0.18    | 0.29  | -0.75  | 0.42  |
| Maharashtra | ari      | Wealth            | Middle              | 0.25     | 0.32  | -0.36  | 0.88  |
| Maharashtra | ari      | Wealth            | Richer              | 0.82     | 0.36  | 0.14   | 1.54  |
| Maharashtra | ari      | Wealth            | Richest             | 0.83     | 0.41  | 0.04   | 1.65  |
| Maharashtra | ari      | Mothers education | Primary             | 1.78     | 0.38  | 1.05   | 2.54  |
| Maharashtra | ari      | Mothers education | Secondary           | 1.18     | 0.35  | 0.53   | 1.88  |
| Maharashtra | ari      | Mothers education | Higher              | 0.73     | 0.40  | -0.03  | 1.52  |
| Maharashtra | ari      | Mothers age       | 20-30               | -0.03    | 0.20  | -0.42  | 0.38  |
| Maharashtra | ari      | Mothers age       | 30-40               | -0.72    | 0.28  | -1.27  | -0.17 |
| Maharashtra | ari      | Sex               | Female              | -0.28    | 0.13  | -0.53  | -0.04 |
| Maharashtra | ari      | Birth weight      | Average             | -0.19    | 0.17  | -0.51  | 0.15  |
| Maharashtra | ari      | Birth weight      | Below Average       | -0.24    | 0.23  | -0.70  | 0.22  |
| Maharashtra | ari      | Breastfed         | No                  | -1.16    | 0.17  | -1.50  | -0.83 |
| Maharashtra | ari      | Toilet            | Unimproved          | 0.21     | 0.18  | -0.15  | 0.57  |
| Maharashtra | ari      | Toilet            | Improved            | -0.03    | 0.29  | -0.62  | 0.55  |
| Maharashtra | ari      | Location          | Urban               | 0.22     | 0.38  | -0.53  | 0.94  |
| Maharashtra | ari      | Cookign fuel      | Solid               | 0.89     | 0.22  | 0.45   | 1.32  |
| Maharashtra | ari      | Household size    | 05-Oct              | 0.24     | 0.17  | -0.08  | 0.57  |
| Maharashtra | ari      | Household size    | 10+                 | -0.37    | 0.23  | -0.81  | 0.09  |
| Maharashtra | ari      | LLIN              | Yes                 | 0.00     | 0.26  | -0.51  | 0.50  |
| Maharashtra | ari      | Access            | Significant problem | 0.10     | 0.16  | -0.21  | 0.40  |
| Maharashtra | ari      | Vaccination       | -                   | 0.02     | 4.89  | -9.51  | 9.78  |

| Name        | Response | Group             | Level               | Estimate | Error | lci   | uci   |
|-------------|----------|-------------------|---------------------|----------|-------|-------|-------|
| Maharashtra | dia      | Intercept         | -                   | -2.63    | 2.70  | -7.82 | 2.74  |
| Maharashtra | dia      | Age               | 1-2                 | -0.30    | 0.10  | -0.50 | -0.10 |
| Maharashtra | dia      | Age               | 2-3                 | -1.15    | 0.11  | -1.38 | -0.93 |
| Maharashtra | dia      | Age               | 3-4                 | -1.18    | 0.12  | -1.41 | -0.95 |
| Maharashtra | dia      | Age               | 4-5                 | -1.64    | 0.13  | -1.89 | -1.39 |
| Maharashtra | dia      | Month             | May                 | -0.68    | 0.25  | -1.18 | -0.17 |
| Maharashtra | dia      | Month             | June                | -0.29    | 0.23  | -0.76 | 0.16  |
| Maharashtra | dia      | Month             | July                | 0.18     | 0.24  | -0.28 | 0.66  |
| Maharashtra | dia      | Month             | August              | 0.22     | 0.27  | -0.30 | 0.74  |
| Maharashtra | dia      | Month             | September           | -1.43    | 0.36  | -2.14 | -0.74 |
| Maharashtra | dia      | Wealth            | Poorer              | 0.30     | 0.15  | 0.01  | 0.59  |
| Maharashtra | dia      | Wealth            | Middle              | 0.25     | 0.16  | -0.06 | 0.56  |
| Maharashtra | dia      | Wealth            | Richer              | 0.23     | 0.18  | -0.14 | 0.58  |
| Maharashtra | dia      | Wealth            | Richest             | -0.00    | 0.22  | -0.43 | 0.42  |
| Maharashtra | dia      | Mothers education | Primary             | 0.19     | 0.17  | -0.14 | 0.51  |
| Maharashtra | dia      | Mothers education | Secondary           | 0.14     | 0.15  | -0.14 | 0.43  |
| Maharashtra | dia      | Mothers education | Higher              | 0.49     | 0.19  | 0.12  | 0.86  |
| Maharashtra | dia      | Mothers age       | 20-30               | -0.26    | 0.11  | -0.47 | -0.05 |
| Maharashtra | dia      | Mothers age       | 30-40               | -0.13    | 0.16  | -0.43 | 0.19  |
| Maharashtra | dia      | Sex               | Female              | -0.01    | 0.07  | -0.15 | 0.13  |
| Maharashtra | dia      | Birth weight      | Average             | 0.18     | 0.09  | -0.00 | 0.36  |
| Maharashtra | dia      | Birth weight      | Below Average       | 0.54     | 0.13  | 0.29  | 0.79  |
| Maharashtra | dia      | Breastfed         | No                  | -0.54    | 0.09  | -0.70 | -0.36 |
| Maharashtra | dia      | Toilet            | Unimproved          | 0.24     | 0.10  | 0.04  | 0.45  |
| Maharashtra | dia      | Toilet            | Improved            | 0.12     | 0.15  | -0.17 | 0.41  |
| Maharashtra | dia      | Location          | Urban               | -0.16    | 0.16  | -0.47 | 0.17  |
| Maharashtra | dia      | Cookign fuel      | Solid               | 0.01     | 0.11  | -0.21 | 0.22  |
| Maharashtra | dia      | Household size    | 05-Oct              | -0.04    | 0.09  | -0.22 | 0.14  |
| Maharashtra | dia      | Household size    | 10+                 | 0.06     | 0.13  | -0.18 | 0.31  |
| Maharashtra | dia      | LLIN              | Yes                 | 0.23     | 0.16  | -0.08 | 0.54  |
| Maharashtra | dia      | Access            | Significant problem | 0.39     | 0.08  | 0.23  | 0.55  |
| Maharashtra | dia      | Vaccination       | -                   | 0.07     | 5.03  | -9.79 | 9.71  |

| Name        | Response | Group             | Level               | Estimate | Error | lci   | uci   |
|-------------|----------|-------------------|---------------------|----------|-------|-------|-------|
| Maharashtra | fever    | Intercept         | -                   | -2.69    | 2.65  | -8.00 | 2.57  |
| Maharashtra | fever    | Age               | 1-2                 | -0.21    | 0.10  | -0.41 | -0.03 |
| Maharashtra | fever    | Age               | 2-3                 | -0.79    | 0.10  | -0.99 | -0.59 |
| Maharashtra | fever    | Age               | 3-4                 | -0.54    | 0.10  | -0.74 | -0.34 |
| Maharashtra | fever    | Age               | 4-5                 | -0.71    | 0.10  | -0.91 | -0.51 |
| Maharashtra | fever    | Month             | May                 | -0.69    | 0.24  | -1.17 | -0.22 |
| Maharashtra | fever    | Month             | June                | -0.75    | 0.23  | -1.20 | -0.32 |
| Maharashtra | fever    | Month             | July                | -0.64    | 0.24  | -1.10 | -0.17 |
| Maharashtra | fever    | Month             | August              | -0.76    | 0.26  | -1.27 | -0.26 |
| Maharashtra | fever    | Month             | September           | -1.32    | 0.31  | -1.94 | -0.71 |
| Maharashtra | fever    | Wealth            | Poorer              | 0.48     | 0.14  | 0.20  | 0.75  |
| Maharashtra | fever    | Wealth            | Middle              | 0.41     | 0.15  | 0.13  | 0.70  |
| Maharashtra | fever    | Wealth            | Richer              | 0.65     | 0.16  | 0.33  | 0.97  |
| Maharashtra | fever    | Wealth            | Richest             | 0.37     | 0.19  | -0.00 | 0.73  |
| Maharashtra | fever    | Mothers education | Primary             | 0.81     | 0.15  | 0.52  | 1.11  |
| Maharashtra | fever    | Mothers education | Secondary           | 0.51     | 0.14  | 0.24  | 0.79  |
| Maharashtra | fever    | Mothers education | Higher              | 1.02     | 0.17  | 0.68  | 1.36  |
| Maharashtra | fever    | Mothers age       | 20-30               | -0.04    | 0.10  | -0.23 | 0.15  |
| Maharashtra | fever    | Mothers age       | 30-40               | -0.24    | 0.14  | -0.51 | 0.02  |
| Maharashtra | fever    | Sex               | Female              | -0.16    | 0.06  | -0.28 | -0.05 |
| Maharashtra | fever    | Birth weight      | Average             | 0.16     | 0.08  | 0.01  | 0.31  |
| Maharashtra | fever    | Birth weight      | Below Average       | -0.24    | 0.11  | -0.46 | -0.01 |
| Maharashtra | fever    | Breastfed         | No                  | -0.71    | 0.07  | -0.84 | -0.57 |
| Maharashtra | fever    | Toilet            | Unimproved          | 0.25     | 0.08  | 0.09  | 0.41  |
| Maharashtra | fever    | Toilet            | Improved            | 0.03     | 0.13  | -0.23 | 0.28  |
| Maharashtra | fever    | Location          | Urban               | -0.11    | 0.16  | -0.42 | 0.20  |
| Maharashtra | fever    | Cookign fuel      | Solid               | -0.04    | 0.10  | -0.22 | 0.15  |
| Maharashtra | fever    | Household size    | 05-Oct              | 0.13     | 0.08  | -0.02 | 0.28  |
| Maharashtra | fever    | Household size    | 10+                 | -0.02    | 0.11  | -0.23 | 0.20  |
| Maharashtra | fever    | LLIN              | Yes                 | -0.15    | 0.13  | -0.42 | 0.11  |
| Maharashtra | fever    | Access            | Significant problem | 0.34     | 0.07  | 0.20  | 0.48  |
| Maharashtra | fever    | Vaccination       | -                   | -0.03    | 4.94  | -9.85 | 9.91  |

| Name              | Response | Group             | Level               | Estimate | Error | Ici   | uci   |
|-------------------|----------|-------------------|---------------------|----------|-------|-------|-------|
| Arunachal Pradesh | wasted   | Intercept         | -                   | -3.60    | 2.65  | -8.88 | 1.46  |
| Arunachal Pradesh | wasted   | Age               | 1-2                 | -0.13    | 1.15  | -2.38 | 2.16  |
| Arunachal Pradesh | wasted   | Age               | 2-3                 | 0.53     | 1.10  | -1.55 | 2.79  |
| Arunachal Pradesh | wasted   | Age               | 3-4                 | 0.28     | 1.12  | -1.84 | 2.62  |
| Arunachal Pradesh | wasted   | Age               | 4-5                 | 0.17     | 1.13  | -2.01 | 2.51  |
| Arunachal Pradesh | wasted   | Month             | May                 | 0.01     | 1.28  | -2.47 | 2.59  |
| Arunachal Pradesh | wasted   | Month             | June                | 0.23     | 3.20  | -6.67 | 6.08  |
| Arunachal Pradesh | wasted   | Month             | August              | 0.61     | 1.24  | -1.77 | 3.10  |
| Arunachal Pradesh | wasted   | Month             | September           | 1.05     | 1.22  | -1.26 | 3.53  |
| Arunachal Pradesh | wasted   | Month             | October             | 0.89     | 1.16  | -1.27 | 3.27  |
| Arunachal Pradesh | wasted   | Month             | November            | 0.92     | 1.21  | -1.32 | 3.38  |
| Arunachal Pradesh | wasted   | Wealth            | Poorer              | 0.14     | 0.82  | -1.47 | 1.78  |
| Arunachal Pradesh | wasted   | Wealth            | Middle              | -0.23    | 1.01  | -2.24 | 1.74  |
| Arunachal Pradesh | wasted   | Wealth            | Richer              | -0.23    | 1.37  | -3.00 | 2.41  |
| Arunachal Pradesh | wasted   | Wealth            | Richest             | -0.81    | 1.84  | -4.62 | 2.59  |
| Arunachal Pradesh | wasted   | Mothers education | Primary             | 0.15     | 0.87  | -1.57 | 1.87  |
| Arunachal Pradesh | wasted   | Mothers education | Secondary           | -0.29    | 0.74  | -1.73 | 1.15  |
| Arunachal Pradesh | wasted   | Mothers education | Higher              | 0.10     | 1.47  | -2.90 | 2.88  |
| Arunachal Pradesh | wasted   | Mothers age       | 20-30               | 0.51     | 0.95  | -1.21 | 2.50  |
| Arunachal Pradesh | wasted   | Mothers age       | 30-40               | 0.37     | 1.10  | -1.71 | 2.57  |
| Arunachal Pradesh | wasted   | Mothers age       | 40+                 | -1.10    | 2.72  | -7.26 | 3.50  |
| Arunachal Pradesh | wasted   | Sex               | Female              | -0.34    | 0.57  | -1.47 | 0.78  |
| Arunachal Pradesh | wasted   | Birth weight      | Average             | 0.51     | 0.80  | -0.97 | 2.15  |
| Arunachal Pradesh | wasted   | Birth weight      | Below Average       | 0.31     | 1.07  | -1.82 | 2.38  |
| Arunachal Pradesh | wasted   | Breastfed         | No                  | -0.04    | 0.63  | -1.28 | 1.17  |
| Arunachal Pradesh | wasted   | Toilet            | Unimproved          | 0.20     | 0.70  | -1.20 | 1.54  |
| Arunachal Pradesh | wasted   | Toilet            | Improved            | -0.07    | 0.80  | -1.69 | 1.42  |
| Arunachal Pradesh | wasted   | Location          | Urban               | -0.41    | 0.90  | -2.24 | 1.28  |
| Arunachal Pradesh | wasted   | Cookign fuel      | Solid               | -0.09    | 0.96  | -1.93 | 1.79  |
| Arunachal Pradesh | wasted   | Household size    | 05-Oct              | -0.10    | 0.63  | -1.32 | 1.18  |
| Arunachal Pradesh | wasted   | Household size    | 10+                 | -0.57    | 1.58  | -4.02 | 2.21  |
| Arunachal Pradesh | wasted   | LLIN              | Yes                 | 0.02     | 0.64  | -1.23 | 1.25  |
| Arunachal Pradesh | wasted   | Access            | Significant problem | 0.13     | 0.64  | -1.10 | 1.41  |
| Arunachal Pradesh | wasted   | Vaccination       | -                   | 0.05     | 5.05  | -9.99 | 10.18 |

| Name        | Response | Group             | Level               | Estimate | Error | lci   | uci   |
|-------------|----------|-------------------|---------------------|----------|-------|-------|-------|
| Maharashtra | wasted   | Intercept         | -                   | -0.90    | 2.67  | -6.18 | 4.29  |
| Maharashtra | wasted   | Age               | 1-2                 | -0.64    | 0.08  | -0.80 | -0.48 |
| Maharashtra | wasted   | Age               | 2-3                 | -0.67    | 0.08  | -0.83 | -0.51 |
| Maharashtra | wasted   | Age               | 3-4                 | -0.60    | 0.08  | -0.76 | -0.43 |
| Maharashtra | wasted   | Age               | 4-5                 | -0.71    | 0.08  | -0.88 | -0.55 |
| Maharashtra | wasted   | Month             | May                 | 0.31     | 0.17  | -0.02 | 0.65  |
| Maharashtra | wasted   | Month             | June                | 0.55     | 0.16  | 0.24  | 0.87  |
| Maharashtra | wasted   | Month             | July                | 0.41     | 0.17  | 0.07  | 0.75  |
| Maharashtra | wasted   | Month             | August              | 0.38     | 0.19  | 0.01  | 0.74  |
| Maharashtra | wasted   | Month             | September           | 0.74     | 0.21  | 0.34  | 1.15  |
| Maharashtra | wasted   | Wealth            | Poorer              | -0.13    | 0.09  | -0.31 | 0.05  |
| Maharashtra | wasted   | Wealth            | Middle              | -0.49    | 0.10  | -0.69 | -0.30 |
| Maharashtra | wasted   | Wealth            | Richer              | -0.55    | 0.12  | -0.78 | -0.33 |
| Maharashtra | wasted   | Wealth            | Richest             | -0.97    | 0.14  | -1.24 | -0.70 |
| Maharashtra | wasted   | Mothers education | Primary             | -0.02    | 0.10  | -0.22 | 0.17  |
| Maharashtra | wasted   | Mothers education | Secondary           | 0.06     | 0.09  | -0.10 | 0.23  |
| Maharashtra | wasted   | Mothers education | Higher              | -0.25    | 0.12  | -0.49 | -0.01 |
| Maharashtra | wasted   | Mothers age       | 20-30               | 0.26     | 0.07  | 0.12  | 0.41  |
| Maharashtra | wasted   | Mothers age       | 30-40               | 0.55     | 0.10  | 0.35  | 0.76  |
| Maharashtra | wasted   | Sex               | Female              | -0.00    | 0.05  | -0.09 | 0.09  |
| Maharashtra | wasted   | Birth weight      | Average             | 0.04     | 0.06  | -0.07 | 0.16  |
| Maharashtra | wasted   | Birth weight      | Below Average       | 0.39     | 0.09  | 0.21  | 0.56  |
| Maharashtra | wasted   | Breastfed         | No                  | 0.02     | 0.05  | -0.09 | 0.12  |
| Maharashtra | wasted   | Toilet            | Unimproved          | -0.02    | 0.07  | -0.15 | 0.11  |
| Maharashtra | wasted   | Toilet            | Improved            | 0.06     | 0.10  | -0.13 | 0.26  |
| Maharashtra | wasted   | Location          | Urban               | -0.11    | 0.11  | -0.32 | 0.10  |
| Maharashtra | wasted   | Cookign fuel      | Solid               | -0.12    | 0.08  | -0.27 | 0.03  |
| Maharashtra | wasted   | Household size    | 05-Oct              | -0.19    | 0.06  | -0.31 | -0.07 |
| Maharashtra | wasted   | Household size    | 10+                 | -0.25    | 0.08  | -0.42 | -0.09 |
| Maharashtra | wasted   | LLIN              | Yes                 | -0.20    | 0.12  | -0.43 | 0.03  |
| Maharashtra | wasted   | Access            | Significant problem | -0.13    | 0.06  | -0.25 | -0.02 |
| Maharashtra | wasted   | Vaccination       | -                   | 0.02     | 4.98  | -9.61 | 9.89  |

| Name   | Response | Group             | Level               | Estimate | Error | lci    | uci   |
|--------|----------|-------------------|---------------------|----------|-------|--------|-------|
| Malawi | ari      | Intercept         | -                   | -5.99    | 2.53  | -11.19 | -1.34 |
| Malawi | ari      | Age               | 1-2                 | -0.18    | 0.25  | -0.66  | 0.31  |
| Malawi | ari      | Age               | 2-3                 | 0.18     | 0.24  | -0.30  | 0.66  |
| Malawi | ari      | Age               | 3-4                 | -0.02    | 0.26  | -0.53  | 0.48  |
| Malawi | ari      | Age               | 4-5                 | 0.24     | 0.26  | -0.28  | 0.75  |
| Malawi | ari      | Month             | February            | 0.51     | 0.47  | -0.46  | 1.40  |
| Malawi | ari      | Month             | October             | 0.67     | 0.26  | 0.15   | 1.18  |
| Malawi | ari      | Month             | November            | 0.36     | 0.23  | -0.09  | 0.81  |
| Malawi | ari      | Month             | December            | -0.26    | 0.30  | -0.86  | 0.32  |
| Malawi | ari      | Wealth            | Poorer              | -0.17    | 0.21  | -0.57  | 0.24  |
| Malawi | ari      | Wealth            | Middle              | 0.19     | 0.21  | -0.21  | 0.60  |
| Malawi | ari      | Wealth            | Richer              | -0.07    | 0.22  | -0.52  | 0.37  |
| Malawi | ari      | Wealth            | Richest             | -0.30    | 0.31  | -0.92  | 0.31  |
| Malawi | ari      | Mothers education | Primary             | 0.18     | 0.22  | -0.24  | 0.60  |
| Malawi | ari      | Mothers education | Secondary           | 0.20     | 0.28  | -0.36  | 0.74  |
| Malawi | ari      | Mothers education | Higher              | -1.22    | 1.04  | -3.51  | 0.53  |
| Malawi | ari      | Mothers age       | 20-30               | 0.17     | 0.21  | -0.24  | 0.60  |
| Malawi | ari      | Mothers age       | 30-40               | 0.33     | 0.24  | -0.14  | 0.81  |
| Malawi | ari      | Mothers age       | 40+                 | 0.62     | 0.39  | -0.16  | 1.37  |
| Malawi | ari      | Sex               | Female              | -0.15    | 0.14  | -0.43  | 0.12  |
| Malawi | ari      | Birth weight      | Average             | -0.08    | 0.16  | -0.39  | 0.22  |
| Malawi | ari      | Birth weight      | Below Average       | 0.13     | 0.20  | -0.26  | 0.52  |
| Malawi | ari      | Breastfed         | No                  | -1.03    | 0.22  | -1.47  | -0.62 |
| Malawi | ari      | Toilet            | Unimproved          | 0.31     | 0.17  | -0.03  | 0.65  |
| Malawi | ari      | Toilet            | Improved            | 0.24     | 0.21  | -0.17  | 0.63  |
| Malawi | ari      | Location          | Urban               | 0.23     | 0.32  | -0.40  | 0.84  |
| Malawi | ari      | Cookign fuel      | Solid               | 1.96     | 1.55  | -0.41  | 5.60  |
| Malawi | ari      | Household size    | 05-Oct              | 0.34     | 0.17  | 0.01   | 0.67  |
| Malawi | ari      | Household size    | 10+                 | -0.03    | 0.43  | -0.92  | 0.80  |
| Malawi | ari      | LLIN              | Yes                 | -0.12    | 0.15  | -0.41  | 0.17  |
| Malawi | ari      | Access            | Significant problem | -0.05    | 0.16  | -0.37  | 0.27  |
| Malawi | ari      | Vaccination       | -                   | 0.14     | 2.96  | -5.68  | 5.82  |

| Name   | Response | Group             | Level               | Estimate | Error | lci   | uci   |
|--------|----------|-------------------|---------------------|----------|-------|-------|-------|
| Malawi | dia      | Intercept         | -                   | 1.62     | 1.43  | -1.17 | 4.50  |
| Malawi | dia      | Age               | 1-2                 | -0.29    | 0.13  | -0.54 | -0.04 |
| Malawi | dia      | Age               | 2-3                 | -1.10    | 0.14  | -1.37 | -0.84 |
| Malawi | dia      | Age               | 3-4                 | -1.47    | 0.14  | -1.75 | -1.19 |
| Malawi | dia      | Age               | 4-5                 | -1.91    | 0.17  | -2.24 | -1.58 |
| Malawi | dia      | Month             | February            | 0.42     | 0.28  | -0.15 | 0.98  |
| Malawi | dia      | Month             | October             | 0.30     | 0.16  | -0.01 | 0.61  |
| Malawi | dia      | Month             | November            | 0.07     | 0.13  | -0.19 | 0.33  |
| Malawi | dia      | Month             | December            | -0.17    | 0.16  | -0.49 | 0.15  |
| Malawi | dia      | Wealth            | Poorer              | -0.07    | 0.12  | -0.30 | 0.16  |
| Malawi | dia      | Wealth            | Middle              | -0.21    | 0.13  | -0.47 | 0.05  |
| Malawi | dia      | Wealth            | Richer              | -0.23    | 0.14  | -0.50 | 0.05  |
| Malawi | dia      | Wealth            | Richest             | -0.14    | 0.18  | -0.49 | 0.20  |
| Malawi | dia      | Mothers education | Primary             | 0.42     | 0.14  | 0.15  | 0.70  |
| Malawi | dia      | Mothers education | Secondary           | 0.21     | 0.17  | -0.13 | 0.54  |
| Malawi | dia      | Mothers education | Higher              | -0.47    | 0.45  | -1.36 | 0.41  |
| Malawi | dia      | Mothers age       | 20-30               | -0.05    | 0.11  | -0.27 | 0.18  |
| Malawi | dia      | Mothers age       | 30-40               | -0.58    | 0.14  | -0.86 | -0.29 |
| Malawi | dia      | Mothers age       | 40+                 | -0.75    | 0.27  | -1.29 | -0.23 |
| Malawi | dia      | Sex               | Female              | -0.32    | 0.08  | -0.49 | -0.16 |
| Malawi | dia      | Birth weight      | Average             | -0.15    | 0.09  | -0.32 | 0.03  |
| Malawi | dia      | Birth weight      | Below Average       | -0.04    | 0.12  | -0.28 | 0.21  |
| Malawi | dia      | Breastfed         | No                  | -0.57    | 0.13  | -0.82 | -0.33 |
| Malawi | dia      | Toilet            | Unimproved          | 0.05     | 0.11  | -0.17 | 0.27  |
| Malawi | dia      | Toilet            | Improved            | 0.02     | 0.13  | -0.23 | 0.27  |
| Malawi | dia      | Location          | Urban               | 0.60     | 0.18  | 0.24  | 0.96  |
| Malawi | dia      | Cookign fuel      | Solid               | 0.01     | 0.45  | -0.84 | 0.92  |
| Malawi | dia      | Household size    | 05-Oct              | 0.10     | 0.10  | -0.09 | 0.29  |
| Malawi | dia      | Household size    | 10+                 | -0.09    | 0.25  | -0.59 | 0.39  |
| Malawi | dia      | LLIN              | Yes                 | -0.11    | 0.09  | -0.29 | 0.06  |
| Malawi | dia      | Access            | Significant problem | 0.10     | 0.10  | -0.09 | 0.29  |
| Malawi | dia      | Vaccination       | -                   | -3.08    | 2.06  | -7.16 | 0.93  |



| Name   | Response | Group             | Level               | Estimate | Error | lci   | uci   |
|--------|----------|-------------------|---------------------|----------|-------|-------|-------|
| Malawi | fever    | Intercept         | -                   | -0.35    | 1.31  | -2.93 | 2.26  |
| Malawi | fever    | Age               | 1-2                 | 0.06     | 0.13  | -0.19 | 0.31  |
| Malawi | fever    | Age               | 2-3                 | -0.07    | 0.13  | -0.32 | 0.18  |
| Malawi | fever    | Age               | 3-4                 | -0.20    | 0.13  | -0.45 | 0.06  |
| Malawi | fever    | Age               | 4-5                 | -0.57    | 0.14  | -0.85 | -0.29 |
| Malawi | fever    | Month             | February            | 0.39     | 0.27  | -0.14 | 0.93  |
| Malawi | fever    | Month             | October             | 0.71     | 0.15  | 0.42  | 1.00  |
| Malawi | fever    | Month             | November            | 0.26     | 0.13  | 0.01  | 0.51  |
| Malawi | fever    | Month             | December            | 0.11     | 0.15  | -0.18 | 0.41  |
| Malawi | fever    | Wealth            | Poorer              | -0.15    | 0.11  | -0.36 | 0.06  |
| Malawi | fever    | Wealth            | Middle              | -0.16    | 0.11  | -0.39 | 0.06  |
| Malawi | fever    | Wealth            | Richer              | -0.11    | 0.12  | -0.34 | 0.13  |
| Malawi | fever    | Wealth            | Richest             | -0.49    | 0.16  | -0.81 | -0.17 |
| Malawi | fever    | Mothers education | Primary             | 0.23     | 0.12  | 0.01  | 0.45  |
| Malawi | fever    | Mothers education | Secondary           | 0.19     | 0.15  | -0.10 | 0.48  |
| Malawi | fever    | Mothers education | Higher              | 0.40     | 0.36  | -0.31 | 1.10  |
| Malawi | fever    | Mothers age       | 20-30               | 0.10     | 0.11  | -0.10 | 0.31  |
| Malawi | fever    | Mothers age       | 30-40               | -0.06    | 0.13  | -0.31 | 0.19  |
| Malawi | fever    | Mothers age       | 40+                 | 0.00     | 0.22  | -0.44 | 0.43  |
| Malawi | fever    | Sex               | Female              | 0.05     | 0.07  | -0.09 | 0.19  |
| Malawi | fever    | Birth weight      | Average             | -0.13    | 0.08  | -0.28 | 0.03  |
| Malawi | fever    | Birth weight      | Below Average       | 0.17     | 0.11  | -0.04 | 0.38  |
| Malawi | fever    | Breastfed         | No                  | -0.70    | 0.10  | -0.91 | -0.50 |
| Malawi | fever    | Toilet            | Unimproved          | 0.14     | 0.10  | -0.05 | 0.33  |
| Malawi | fever    | Toilet            | Improved            | 0.18     | 0.11  | -0.04 | 0.40  |
| Malawi | fever    | Location          | Urban               | 0.12     | 0.17  | -0.22 | 0.45  |
| Malawi | fever    | Cookign fuel      | Solid               | -0.22    | 0.39  | -0.96 | 0.56  |
| Malawi | fever    | Household size    | 05-Oct              | 0.15     | 0.09  | -0.02 | 0.32  |
| Malawi | fever    | Household size    | 10+                 | 0.02     | 0.21  | -0.40 | 0.42  |
| Malawi | fever    | LLIN              | Yes                 | -0.24    | 0.08  | -0.39 | -0.09 |
| Malawi | fever    | Access            | Significant problem | 0.05     | 0.09  | -0.12 | 0.22  |
| Malawi | fever    | Vaccination       | -                   | -0.71    | 1.89  | -4.41 | 3.00  |

| Name   | Response | Group             | Level               | Estimate | Error | lci    | uci   |
|--------|----------|-------------------|---------------------|----------|-------|--------|-------|
| Malawi | wasted   | Intercept         | -                   | 1.51     | 2.54  | -3.45  | 6.54  |
| Malawi | wasted   | Age               | 1-2                 | -0.28    | 0.32  | -0.89  | 0.34  |
| Malawi | wasted   | Age               | 2-3                 | -0.62    | 0.34  | -1.30  | 0.04  |
| Malawi | wasted   | Age               | 3-4                 | -0.94    | 0.36  | -1.66  | -0.24 |
| Malawi | wasted   | Age               | 4-5                 | -0.77    | 0.38  | -1.52  | -0.04 |
| Malawi | wasted   | Month             | February            | 0.79     | 0.53  | -0.28  | 1.80  |
| Malawi | wasted   | Month             | October             | -0.65    | 0.38  | -1.42  | 0.08  |
| Malawi | wasted   | Month             | November            | -1.08    | 0.34  | -1.75  | -0.43 |
| Malawi | wasted   | Month             | December            | -0.03    | 0.33  | -0.68  | 0.61  |
| Malawi | wasted   | Wealth            | Poorer              | -0.16    | 0.31  | -0.78  | 0.44  |
| Malawi | wasted   | Wealth            | Middle              | 0.05     | 0.31  | -0.57  | 0.66  |
| Malawi | wasted   | Wealth            | Richer              | -0.37    | 0.36  | -1.07  | 0.33  |
| Malawi | wasted   | Wealth            | Richest             | -0.34    | 0.44  | -1.24  | 0.51  |
| Malawi | wasted   | Mothers education | Primary             | 0.34     | 0.37  | -0.35  | 1.07  |
| Malawi | wasted   | Mothers education | Secondary           | 0.56     | 0.44  | -0.30  | 1.44  |
| Malawi | wasted   | Mothers education | Higher              | 1.02     | 0.81  | -0.60  | 2.57  |
| Malawi | wasted   | Mothers age       | 20-30               | -0.44    | 0.27  | -0.96  | 0.09  |
| Malawi | wasted   | Mothers age       | 30-40               | -0.50    | 0.34  | -1.16  | 0.15  |
| Malawi | wasted   | Mothers age       | 40+                 | 0.25     | 0.53  | -0.83  | 1.26  |
| Malawi | wasted   | Sex               | Female              | -0.70    | 0.21  | -1.11  | -0.30 |
| Malawi | wasted   | Birth weight      | Average             | 0.33     | 0.25  | -0.17  | 0.82  |
| Malawi | wasted   | Birth weight      | Below Average       | 1.06     | 0.30  | 0.47   | 1.66  |
| Malawi | wasted   | Breastfed         | No                  | -0.09    | 0.30  | -0.68  | 0.48  |
| Malawi | wasted   | Toilet            | Unimproved          | 0.05     | 0.28  | -0.49  | 0.58  |
| Malawi | wasted   | Toilet            | Improved            | 0.25     | 0.32  | -0.39  | 0.85  |
| Malawi | wasted   | Location          | Urban               | 0.26     | 0.41  | -0.57  | 1.05  |
| Malawi | wasted   | Cookign fuel      | Solid               | -0.81    | 0.75  | -2.23  | 0.72  |
| Malawi | wasted   | Household size    | 05-Oct              | 0.08     | 0.24  | -0.40  | 0.57  |
| Malawi | wasted   | Household size    | 10+                 | 1.34     | 0.45  | 0.44   | 2.20  |
| Malawi | wasted   | LLIN              | Yes                 | -0.24    | 0.22  | -0.68  | 0.18  |
| Malawi | wasted   | Access            | Significant problem | 0.16     | 0.25  | -0.32  | 0.66  |
| Malawi | wasted   | Vaccination       | -                   | -6.57    | 3.58  | -13.57 | 0.45  |

| Name | Response | Group             | Level               | Estimate | Error | lci    | uci   |
|------|----------|-------------------|---------------------|----------|-------|--------|-------|
| Mali | ari      | Intercept         | -                   | -9.03    | 1.64  | -12.38 | -5.90 |
| Mali | ari      | Age               | 1-2                 | 0.26     | 0.30  | -0.33  | 0.86  |
| Mali | ari      | Age               | 2-3                 | 0.06     | 0.32  | -0.56  | 0.70  |
| Mali | ari      | Age               | 3-4                 | -0.14    | 0.34  | -0.82  | 0.53  |
| Mali | ari      | Age               | 4-5                 | -0.19    | 0.36  | -0.90  | 0.53  |
| Mali | ari      | Month             | September           | -0.20    | 0.31  | -0.82  | 0.42  |
| Mali | ari      | Month             | October             | -0.20    | 0.36  | -0.92  | 0.50  |
| Mali | ari      | Month             | November            | -1.25    | 1.07  | -3.54  | 0.58  |
| Mali | ari      | Wealth            | Poorer              | -0.32    | 0.26  | -0.82  | 0.18  |
| Mali | ari      | Wealth            | Middle              | -0.55    | 0.31  | -1.16  | 0.06  |
| Mali | ari      | Wealth            | Richer              | 0.27     | 0.36  | -0.45  | 0.96  |
| Mali | ari      | Wealth            | Richest             | 0.55     | 0.53  | -0.47  | 1.59  |
| Mali | ari      | Mothers education | Primary             | -0.80    | 0.36  | -1.55  | -0.15 |
| Mali | ari      | Mothers education | Secondary           | -0.30    | 0.31  | -0.94  | 0.29  |
| Mali | ari      | Mothers education | Higher              | -0.35    | 0.89  | -2.29  | 1.20  |
| Mali | ari      | Mothers age       | 20-30               | 0.13     | 0.30  | -0.44  | 0.74  |
| Mali | ari      | Mothers age       | 30-40               | -0.05    | 0.33  | -0.68  | 0.61  |
| Mali | ari      | Mothers age       | 40+                 | 0.52     | 0.46  | -0.42  | 1.37  |
| Mali | ari      | Sex               | Female              | 0.05     | 0.17  | -0.29  | 0.40  |
| Mali | ari      | Birth weight      | Average             | -0.40    | 0.19  | -0.77  | -0.03 |
| Mali | ari      | Birth weight      | Below Average       | -0.39    | 0.26  | -0.92  | 0.11  |
| Mali | ari      | Breastfed         | No                  | 0.13     | 0.22  | -0.31  | 0.56  |
| Mali | ari      | Toilet            | Unimproved          | 0.08     | 0.23  | -0.37  | 0.52  |
| Mali | ari      | Toilet            | Improved            | -0.12    | 0.23  | -0.56  | 0.32  |
| Mali | ari      | Location          | Urban               | -1.56    | 0.49  | -2.56  | -0.61 |
| Mali | ari      | Cookign fuel      | Solid               | 0.41     | 1.02  | -1.32  | 2.64  |
| Mali | ari      | Household size    | 05-Oct              | 0.09     | 0.27  | -0.41  | 0.63  |
| Mali | ari      | Household size    | 10+                 | 0.15     | 0.31  | -0.46  | 0.76  |
| Mali | ari      | LLIN              | Yes                 | 0.28     | 0.26  | -0.20  | 0.79  |
| Mali | ari      | Access            | Significant problem | 0.06     | 0.19  | -0.31  | 0.43  |
| Mali | ari      | Vaccination       | -                   | 10.56    | 3.00  | 4.61   | 16.37 |
